# Supplementary material
Source: publisher figshare collection journal article supplement (https://acs.figshare.com/ndownloader/files/5522594)
Supplement: Supplementary file 1 [file 5522594]

REMARK   4      COMPLIES WITH FORMAT V. 3.0, 1-DEC-2006
REMARK   4 FILE COMPLIES WITH FORMAT V. 3.0, 1-DEC-2006
REMARK 888
REMARK 888 WRITTEN BY MAESTRO (A PRODUCT OF SCHRODINGER, LLC)
SEQRES   1 A  310  GLY GLU ALA PRO ASN GLN ALA LEU LEU ARG ILE LEU LYS
SEQRES   2 A  310  GLU THR GLU PHE LYS LYS ILE LYS VAL LEU GLY SER GLY
SEQRES   3 A  310  ALA PHE GLY THR VAL TYR LYS GLY LEU TRP ILE PRO GLU
SEQRES   4 A  310  GLY GLU LYS VAL LYS ILE PRO VAL ALA ILE LYS GLU LEU
SEQRES   5 A  310  ARG GLU ALA THR SER PRO LYS ALA ASN LYS GLU ILE LEU
SEQRES   6 A  310  ASP GLU ALA TYR VAL MET ALA SER VAL ASP ASN PRO HIS
SEQRES   7 A  310  VAL CYS ARG LEU LEU GLY ILE CYS LEU THR SER THR VAL
SEQRES   8 A  310  GLN LEU ILE MET GLN LEU MET PRO PHE GLY CYS LEU LEU
SEQRES   9 A  310  ASP TYR VAL ARG GLU HIS LYS ASP ASN ILE GLY SER GLN
SEQRES  10 A  310  TYR LEU LEU ASN TRP CYS VAL GLN ILE ALA LYS GLY MET
SEQRES  11 A  310  ASN TYR LEU GLU ASP ARG ARG LEU VAL HIS ARG ASP LEU
SEQRES  12 A  310  ALA ALA ARG ASN VAL LEU VAL LYS THR PRO GLN HIS VAL
SEQRES  13 A  310  LYS ILE THR ASP PHE GLY LEU ALA LYS LEU LEU GLY ALA
SEQRES  14 A  310  GLU GLU LYS GLU TYR HIS ALA GLU GLY GLY LYS VAL PRO
SEQRES  15 A  310  ILE LYS TRP MET ALA LEU GLU SER ILE LEU HIS ARG ILE
SEQRES  16 A  310  TYR THR HIS GLN SER ASP VAL TRP SER TYR GLY VAL THR
SEQRES  17 A  310  VAL TRP GLU LEU MET THR PHE GLY SER LYS PRO TYR ASP
SEQRES  18 A  310  GLY ILE PRO ALA SER GLU ILE SER SER ILE LEU GLU LYS
SEQRES  19 A  310  GLY GLU ARG LEU PRO GLN PRO PRO ILE CYS THR ILE ASP
SEQRES  20 A  310  VAL TYR MET ILE MET VAL LYS CYS TRP MET ILE ASP ALA
SEQRES  21 A  310  ASP SER ARG PRO LYS PHE ARG GLU LEU ILE ILE GLU PHE
SEQRES  22 A  310  SER LYS MET ALA ARG ASP PRO GLN ARG TYR LEU VAL ILE
SEQRES  23 A  310  GLN GLY ASP GLU ARG MET HIS GLU GLU ASP MET ASP ASP
SEQRES  24 A  310  VAL VAL ASP ALA ASP GLU TYR LEU ILE PRO GLN
HELIX    1   1 ALA A  755  SER A  768  1
HELIX    2   2 LEU A  798  GLU A  804  1
HELIX    3   3 SER A  811  ASP A  830  1
HELIX    4   4 LEU A  883  HIS A  888  1
HELIX    5   5 HIS A  893  MET A  908  1
HELIX    6   6 ILE A  923  LYS A  929  1
HELIX    7   7 ILE A  941  CYS A  950  1
HELIX    8   8 PHE A  961  ARG A  973  1
TURN     1   1 GLY A 696  GLU A 711
TURN     2   2 ALA A 722  PHE A 723
TURN     3   3 ILE A 732  LYS A 739
TURN     4   4 ARG A 748  LYS A 754
TURN     5   5 VAL A 769  ARG A 776
TURN     6   6 LEU A 782  VAL A 786
TURN     7   7 GLN A 791  CYS A 797
TURN     8   8 HIS A 805  GLY A 810
TURN     9   9 ARG A 831  ARG A 832
TURN    10  10 HIS A 835  ASN A 842
TURN    11  11 PRO A 848  GLN A 849
TURN    12  12 THR A 854  ALA A 859
TURN    13  13 LEU A 862  GLU A 868
TURN    14  14 ALA A 871  ALA A 882
TURN    15  15 ARG A 889  ARG A 889
TURN    16  16 THR A 892  THR A 892
TURN    17  17 THR A 909  GLU A 922
TURN    18  18 GLY A 930  THR A 940
TURN    19  19 TRP A 951  LYS A 960
TURN    20  20 ASP A 974  GLN A1020
SHEET    1   1 1 PHE A 712  GLY A 721  0
SHEET    1   2 1 GLY A 724  TRP A 731  0
SHEET    1   3 1 ILE A 740  LEU A 747  0
SHEET    1   4 1 LEU A 777  CYS A 781  0
SHEET    1   5 1 GLN A 787  MET A 790  0
SHEET    1   6 1 LEU A 833  VAL A 834  0
SHEET    1   7 1 VAL A 843  THR A 847  0
SHEET    1   8 1 HIS A 850  ILE A 853  0
SHEET    1   9 1 LYS A 860  LEU A 861  0
SHEET    1  10 1 TYR A 869  HIS A 870  0
SHEET    1  11 1 ILE A 890  TYR A 891  0
ATOM      1  N   GLY A 696       1.835  45.716  29.099  1.00 76.72           N1+
ATOM      2  CA  GLY A 696       1.616  47.196  29.081  1.00 77.28           C
ATOM      3  C   GLY A 696       2.798  47.923  28.468  1.00 77.43           C
ATOM      4  O   GLY A 696       2.672  48.641  27.469  1.00 77.86           O
ATOM      5  H1  GLY A 696       1.024  45.258  29.490  1.00  0.00           H
ATOM      6  H2  GLY A 696       1.983  45.392  28.153  1.00  0.00           H
ATOM      7  H3  GLY A 696       2.648  45.496  29.656  1.00  0.00           H
ATOM      8  HA2 GLY A 696       0.713  47.417  28.510  1.00  0.00           H
ATOM      9  HA3 GLY A 696       1.453  47.554  30.098  1.00  0.00           H
ATOM     10  N   GLU A 697       3.956  47.726  29.082  1.00 77.41           N
ATOM     11  CA  GLU A 697       5.202  48.277  28.585  1.00 77.51           C
ATOM     12  C   GLU A 697       5.941  47.163  27.827  1.00 76.95           C
ATOM     13  O   GLU A 697       6.338  47.360  26.679  1.00 78.01           O
ATOM     14  CB  GLU A 697       6.020  48.842  29.762  1.00 77.94           C
ATOM     15  CG  GLU A 697       6.882  50.078  29.431  1.00 78.55           C
ATOM     16  CD  GLU A 697       8.263  49.718  28.831  1.00 79.49           C
ATOM     17  OE1 GLU A 697       8.995  48.870  29.392  1.00 81.22           O
ATOM     18  OE2 GLU A 697       8.631  50.291  27.793  1.00 79.51           O1-
ATOM     19  H   GLU A 697       3.993  47.170  29.923  1.00  0.00           H
ATOM     20  HA  GLU A 697       5.017  49.095  27.886  1.00  0.00           H
ATOM     21  HB2 GLU A 697       5.324  49.167  30.537  1.00  0.00           H
ATOM     22  HB3 GLU A 697       6.617  48.066  30.244  1.00  0.00           H
ATOM     23  HG2 GLU A 697       6.351  50.765  28.771  1.00  0.00           H
ATOM     24  HG3 GLU A 697       7.078  50.631  30.350  1.00  0.00           H
ATOM     25  N   ALA A 698       6.059  46.009  28.453  1.00 75.02           N
ATOM     26  CA  ALA A 698       6.767  44.892  27.873  1.00 73.52           C
ATOM     27  C   ALA A 698       6.121  44.302  26.643  1.00 72.44           C
ATOM     28  O   ALA A 698       4.914  44.237  26.531  1.00 72.29           O
ATOM     29  CB  ALA A 698       6.951  43.830  28.900  1.00 73.54           C
ATOM     30  H   ALA A 698       5.708  45.915  29.394  1.00  0.00           H
ATOM     31  HA  ALA A 698       7.752  45.304  27.655  1.00  0.00           H
ATOM     32  HB1 ALA A 698       7.416  42.921  28.520  1.00  0.00           H
ATOM     33  HB2 ALA A 698       7.574  44.189  29.720  1.00  0.00           H
ATOM     34  HB3 ALA A 698       5.994  43.530  29.329  1.00  0.00           H
ATOM     35  N   PRO A 699       6.960  43.872  25.721  1.00 71.08           N
ATOM     36  CA  PRO A 699       6.520  43.160  24.542  1.00 69.60           C
ATOM     37  C   PRO A 699       6.084  41.794  24.973  1.00 68.30           C
ATOM     38  O   PRO A 699       6.688  41.229  25.847  1.00 68.98           O
ATOM     39  CB  PRO A 699       7.796  43.054  23.740  1.00 69.86           C
ATOM     40  CG  PRO A 699       8.811  42.905  24.741  1.00 70.71           C
ATOM     41  CD  PRO A 699       8.399  43.710  25.919  1.00 71.07           C
ATOM     42  HA  PRO A 699       5.738  43.692  23.996  1.00  0.00           H
ATOM     43  HB2 PRO A 699       7.795  42.238  23.015  1.00  0.00           H
ATOM     44  HB3 PRO A 699       7.956  43.980  23.184  1.00  0.00           H
ATOM     45  HG2 PRO A 699       8.920  41.867  25.038  1.00  0.00           H
ATOM     46  HG3 PRO A 699       9.789  43.212  24.369  1.00  0.00           H
ATOM     47  HD2 PRO A 699       8.692  43.205  26.837  1.00  0.00           H
ATOM     48  HD3 PRO A 699       8.889  44.684  25.880  1.00  0.00           H
ATOM     49  N   ASN A 700       5.051  41.270  24.356  1.00 66.28           N
ATOM     50  CA  ASN A 700       4.478  39.994  24.735  1.00 64.57           C
ATOM     51  C   ASN A 700       5.035  38.839  23.913  1.00 63.54           C
ATOM     52  O   ASN A 700       4.418  38.413  22.954  1.00 65.27           O
ATOM     53  CB  ASN A 700       2.956  40.027  24.629  1.00 64.01           C
ATOM     54  CG  ASN A 700       2.341  38.663  24.875  1.00 64.22           C
ATOM     55  OD1 ASN A 700       3.052  37.662  25.049  1.00 64.74           O
ATOM     56  ND2 ASN A 700       1.024  38.604  24.871  1.00 63.10           N
ATOM     57  H   ASN A 700       4.603  41.789  23.615  1.00  0.00           H
ATOM     58  HA  ASN A 700       4.699  39.780  25.784  1.00  0.00           H
ATOM     59  HB2 ASN A 700       2.551  40.736  25.353  1.00  0.00           H
ATOM     60  HB3 ASN A 700       2.648  40.375  23.641  1.00  0.00           H
ATOM     61 HD21 ASN A 700       0.478  39.435  24.698  1.00  0.00           H
ATOM     62 HD22 ASN A 700       0.567  37.713  24.994  1.00  0.00           H
ATOM     63  N   GLN A 701       6.111  38.252  24.351  1.00 61.98           N
ATOM     64  CA  GLN A 701       6.837  37.319  23.553  1.00 61.77           C
ATOM     65  C   GLN A 701       6.275  35.964  23.727  1.00 60.10           C
ATOM     66  O   GLN A 701       6.944  34.985  23.531  1.00 59.40           O
ATOM     67  CB  GLN A 701       8.289  37.297  23.960  1.00 63.63           C
ATOM     68  CG  GLN A 701       9.197  37.990  23.009  1.00 66.73           C
ATOM     69  CD  GLN A 701      10.277  38.685  23.723  1.00 69.29           C
ATOM     70  OE1 GLN A 701      11.467  38.118  23.705  1.00 71.15           O
ATOM     71  NE2 GLN A 701      10.049  39.721  24.314  1.00 69.00           N
ATOM     72  H   GLN A 701       6.544  38.591  25.198  1.00  0.00           H
ATOM     73  HA  GLN A 701       6.755  37.550  22.488  1.00  0.00           H
ATOM     74  HB2 GLN A 701       8.360  37.722  24.965  1.00  0.00           H
ATOM     75  HB3 GLN A 701       8.735  36.313  24.109  1.00  0.00           H
ATOM     76  HG2 GLN A 701       9.604  37.285  22.282  1.00  0.00           H
ATOM     77  HG3 GLN A 701       8.657  38.742  22.431  1.00  0.00           H
ATOM     78 HE21 GLN A 701       9.119  40.113  24.311  1.00  0.00           H
ATOM     79 HE22 GLN A 701      10.797  40.182  24.810  1.00  0.00           H
ATOM     80  N   ALA A 702       5.029  35.906  24.123  1.00 58.59           N
ATOM     81  CA  ALA A 702       4.412  34.633  24.289  1.00 57.63           C
ATOM     82  C   ALA A 702       4.482  33.992  22.938  1.00 57.31           C
ATOM     83  O   ALA A 702       4.326  34.643  21.953  1.00 57.66           O
ATOM     84  CB  ALA A 702       3.025  34.823  24.700  1.00 56.73           C
ATOM     85  H   ALA A 702       4.485  36.748  24.264  1.00  0.00           H
ATOM     86  HA  ALA A 702       4.946  34.039  25.034  1.00  0.00           H
ATOM     87  HB1 ALA A 702       2.536  33.859  24.699  1.00  0.00           H
ATOM     88  HB2 ALA A 702       3.019  35.235  25.709  1.00  0.00           H
ATOM     89  HB3 ALA A 702       2.459  35.466  24.024  1.00  0.00           H
ATOM     90  N   LEU A 703       4.741  32.704  22.888  1.00 56.20           N
ATOM     91  CA  LEU A 703       4.909  32.029  21.628  1.00 56.14           C
ATOM     92  C   LEU A 703       3.714  31.202  21.299  1.00 55.46           C
ATOM     93  O   LEU A 703       3.184  30.523  22.133  1.00 56.13           O
ATOM     94  CB  LEU A 703       6.157  31.146  21.648  1.00 56.63           C
ATOM     95  CG  LEU A 703       6.242  29.851  20.821  1.00 58.53           C
ATOM     96  CD1 LEU A 703       6.731  30.059  19.420  1.00 59.15           C
ATOM     97  CD2 LEU A 703       7.117  28.834  21.454  1.00 57.07           C
ATOM     98  H   LEU A 703       4.859  32.176  23.740  1.00  0.00           H
ATOM     99  HA  LEU A 703       5.068  32.722  20.798  1.00  0.00           H
ATOM    100  HB2 LEU A 703       7.032  31.765  21.443  1.00  0.00           H
ATOM    101  HB3 LEU A 703       6.293  30.843  22.688  1.00  0.00           H
ATOM    102  HG  LEU A 703       5.286  29.336  20.754  1.00  0.00           H
ATOM    103 HD11 LEU A 703       6.735  29.128  18.852  1.00  0.00           H
ATOM    104 HD12 LEU A 703       6.085  30.756  18.886  1.00  0.00           H
ATOM    105 HD13 LEU A 703       7.742  30.468  19.402  1.00  0.00           H
ATOM    106 HD21 LEU A 703       7.140  27.907  20.879  1.00  0.00           H
ATOM    107 HD22 LEU A 703       8.143  29.192  21.550  1.00  0.00           H
ATOM    108 HD23 LEU A 703       6.765  28.577  22.453  1.00  0.00           H
ATOM    109  N   LEU A 704       3.279  31.270  20.062  1.00 54.21           N
ATOM    110  CA  LEU A 704       2.172  30.470  19.641  1.00 52.97           C
ATOM    111  C   LEU A 704       2.706  29.402  18.758  1.00 53.16           C
ATOM    112  O   LEU A 704       3.264  29.679  17.743  1.00 53.58           O
ATOM    113  CB  LEU A 704       1.253  31.334  18.840  1.00 51.90           C
ATOM    114  CG  LEU A 704       0.074  30.639  18.246  1.00 50.76           C
ATOM    115  CD1 LEU A 704      -0.828  30.347  19.338  1.00 50.66           C
ATOM    116  CD2 LEU A 704      -0.558  31.593  17.351  1.00 47.96           C
ATOM    117  H   LEU A 704       3.748  31.851  19.382  1.00  0.00           H
ATOM    118  HA  LEU A 704       1.615  30.021  20.464  1.00  0.00           H
ATOM    119  HB2 LEU A 704       0.929  32.171  19.463  1.00  0.00           H
ATOM    120  HB3 LEU A 704       1.827  31.809  18.040  1.00  0.00           H
ATOM    121  HG  LEU A 704       0.320  29.736  17.685  1.00  0.00           H
ATOM    122 HD11 LEU A 704      -1.780  29.971  18.960  1.00  0.00           H
ATOM    123 HD12 LEU A 704      -0.450  29.561  19.991  1.00  0.00           H
ATOM    124 HD13 LEU A 704      -1.059  31.216  19.957  1.00  0.00           H
ATOM    125 HD21 LEU A 704      -1.466  31.177  16.913  1.00  0.00           H
ATOM    126 HD22 LEU A 704      -0.836  32.522  17.852  1.00  0.00           H
ATOM    127 HD23 LEU A 704       0.096  31.851  16.516  1.00  0.00           H
ATOM    128  N   ARG A 705       2.607  28.161  19.131  1.00 53.13           N
ATOM    129  CA  ARG A 705       3.125  27.256  18.176  1.00 53.01           C
ATOM    130  C   ARG A 705       1.955  26.747  17.428  1.00 53.07           C
ATOM    131  O   ARG A 705       0.878  26.737  17.939  1.00 53.10           O
ATOM    132  CB  ARG A 705       3.972  26.171  18.791  1.00 53.04           C
ATOM    133  CG  ARG A 705       3.399  25.536  19.957  1.00 54.46           C
ATOM    134  CD  ARG A 705       4.482  25.191  20.912  1.00 55.04           C
ATOM    135  NE  ARG A 705       4.362  26.018  22.088  1.00 56.31           N
ATOM    136  CZ  ARG A 705       5.273  26.081  23.026  1.00 57.49           C
ATOM    137  NH1 ARG A 705       5.105  26.863  24.063  1.00 58.04           N
ATOM    138  NH2 ARG A 705       6.351  25.358  22.910  1.00 58.29           N1+
ATOM    139  H   ARG A 705       2.137  27.856  19.970  1.00  0.00           H
ATOM    140  HA  ARG A 705       3.837  27.604  17.421  1.00  0.00           H
ATOM    141  HB2 ARG A 705       4.249  25.417  18.052  1.00  0.00           H
ATOM    142  HB3 ARG A 705       4.907  26.675  19.048  1.00  0.00           H
ATOM    143  HG2 ARG A 705       2.650  26.164  20.423  1.00  0.00           H
ATOM    144  HG3 ARG A 705       2.863  24.636  19.653  1.00  0.00           H
ATOM    145  HD2 ARG A 705       4.344  24.160  21.239  1.00  0.00           H
ATOM    146  HD3 ARG A 705       5.484  25.234  20.482  1.00  0.00           H
ATOM    147  HE  ARG A 705       3.472  26.479  22.224  1.00  0.00           H
ATOM    148 HH11 ARG A 705       4.271  27.428  24.143  1.00  0.00           H
ATOM    149 HH12 ARG A 705       5.803  26.907  24.791  1.00  0.00           H
ATOM    150 HH21 ARG A 705       6.468  24.752  22.111  1.00  0.00           H
ATOM    151 HH22 ARG A 705       7.076  25.393  23.612  1.00  0.00           H
ATOM    152  N   ILE A 706       2.175  26.383  16.183  1.00 52.91           N
ATOM    153  CA  ILE A 706       1.110  25.848  15.339  1.00 52.60           C
ATOM    154  C   ILE A 706       1.489  24.424  15.034  1.00 52.72           C
ATOM    155  O   ILE A 706       2.660  24.149  14.761  1.00 53.99           O
ATOM    156  CB  ILE A 706       0.959  26.599  14.034  1.00 52.00           C
ATOM    157  CG1 ILE A 706       0.224  27.890  14.292  1.00 50.90           C
ATOM    158  CG2 ILE A 706       0.147  25.769  13.063  1.00 51.24           C
ATOM    159  CD1 ILE A 706       0.750  29.008  13.509  1.00 51.38           C
ATOM    160  H   ILE A 706       3.109  26.421  15.801  1.00  0.00           H
ATOM    161  HA  ILE A 706       0.164  25.886  15.851  1.00  0.00           H
ATOM    162  HB  ILE A 706       1.945  26.791  13.606  1.00  0.00           H
ATOM    163 HG12 ILE A 706      -0.848  27.780  14.120  1.00  0.00           H
ATOM    164 HG13 ILE A 706       0.309  28.184  15.339  1.00  0.00           H
ATOM    165 HG21 ILE A 706      -0.150  26.379  12.210  1.00  0.00           H
ATOM    166 HG22 ILE A 706       0.698  24.936  12.624  1.00  0.00           H
ATOM    167 HG23 ILE A 706      -0.777  25.390  13.505  1.00  0.00           H
ATOM    168 HD11 ILE A 706       0.196  29.923  13.721  1.00  0.00           H
ATOM    169 HD12 ILE A 706       1.798  29.199  13.742  1.00  0.00           H
ATOM    170 HD13 ILE A 706       0.672  28.816  12.439  1.00  0.00           H
ATOM    171  N   LEU A 707       0.513  23.548  15.139  1.00 51.51           N
ATOM    172  CA  LEU A 707       0.745  22.162  14.955  1.00 51.57           C
ATOM    173  C   LEU A 707      -0.145  21.598  13.931  1.00 52.32           C
ATOM    174  O   LEU A 707      -1.315  21.798  13.927  1.00 52.43           O
ATOM    175  CB  LEU A 707       0.486  21.427  16.237  1.00 50.99           C
ATOM    176  CG  LEU A 707       0.862  22.191  17.464  1.00 50.13           C
ATOM    177  CD1 LEU A 707       0.673  21.303  18.582  1.00 47.72           C
ATOM    178  CD2 LEU A 707       2.268  22.542  17.342  1.00 49.86           C
ATOM    179  H   LEU A 707      -0.417  23.856  15.394  1.00  0.00           H
ATOM    180  HA  LEU A 707       1.773  21.954  14.648  1.00  0.00           H
ATOM    181  HB2 LEU A 707      -0.579  21.212  16.343  1.00  0.00           H
ATOM    182  HB3 LEU A 707       0.984  20.455  16.197  1.00  0.00           H
ATOM    183  HG  LEU A 707       0.243  23.077  17.618  1.00  0.00           H
ATOM    184 HD11 LEU A 707       0.943  21.784  19.523  1.00  0.00           H
ATOM    185 HD12 LEU A 707      -0.369  20.998  18.679  1.00  0.00           H
ATOM    186 HD13 LEU A 707       1.266  20.393  18.496  1.00  0.00           H
ATOM    187 HD21 LEU A 707       2.418  23.618  17.308  1.00  0.00           H
ATOM    188 HD22 LEU A 707       2.825  22.262  18.237  1.00  0.00           H
ATOM    189 HD23 LEU A 707       2.823  22.061  16.537  1.00  0.00           H
ATOM    190  N   LYS A 708       0.470  20.799  13.086  1.00 53.42           N
ATOM    191  CA  LYS A 708      -0.200  20.024  12.102  1.00 56.91           C
ATOM    192  C   LYS A 708      -0.870  18.912  12.817  1.00 59.07           C
ATOM    193  O   LYS A 708      -0.340  18.362  13.739  1.00 59.96           O
ATOM    194  CB  LYS A 708       0.806  19.435  11.165  1.00 57.96           C
ATOM    195  CG  LYS A 708       2.051  19.026  11.850  1.00 59.79           C
ATOM    196  CD  LYS A 708       2.921  18.222  10.932  1.00 61.76           C
ATOM    197  CE  LYS A 708       4.126  17.713  11.657  1.00 62.57           C
ATOM    198  NZ  LYS A 708       4.729  16.566  10.968  1.00 68.31           N1+
ATOM    199  H   LYS A 708       1.462  20.645  13.205  1.00  0.00           H
ATOM    200  HA  LYS A 708      -0.925  20.628  11.550  1.00  0.00           H
ATOM    201  HB2 LYS A 708       0.369  18.601  10.611  1.00  0.00           H
ATOM    202  HB3 LYS A 708       1.059  20.180  10.409  1.00  0.00           H
ATOM    203  HG2 LYS A 708       2.626  19.894  12.176  1.00  0.00           H
ATOM    204  HG3 LYS A 708       1.853  18.411  12.720  1.00  0.00           H
ATOM    205  HD2 LYS A 708       2.348  17.384  10.539  1.00  0.00           H
ATOM    206  HD3 LYS A 708       3.225  18.815  10.069  1.00  0.00           H
ATOM    207  HE2 LYS A 708       4.867  18.505  11.776  1.00  0.00           H
ATOM    208  HE3 LYS A 708       3.861  17.368  12.648  1.00  0.00           H
ATOM    209  HZ1 LYS A 708       5.661  16.401  11.324  1.00  0.00           H
ATOM    210  HZ2 LYS A 708       4.167  15.737  11.092  1.00  0.00           H
ATOM    211  HZ3 LYS A 708       4.814  16.769   9.983  1.00  0.00           H
ATOM    212  N   GLU A 709      -2.054  18.570  12.377  1.00 60.64           N
ATOM    213  CA  GLU A 709      -2.885  17.686  13.130  1.00 62.01           C
ATOM    214  C   GLU A 709      -2.318  16.324  13.203  1.00 61.79           C
ATOM    215  O   GLU A 709      -2.822  15.481  13.892  1.00 62.35           O
ATOM    216  CB  GLU A 709      -4.182  17.555  12.424  1.00 63.21           C
ATOM    217  CG  GLU A 709      -4.018  16.648  11.310  1.00 66.62           C
ATOM    218  CD  GLU A 709      -5.284  16.434  10.623  1.00 69.89           C
ATOM    219  OE1 GLU A 709      -6.164  17.297  10.779  1.00 70.32           O
ATOM    220  OE2 GLU A 709      -5.397  15.398   9.951  1.00 72.20           O1-
ATOM    221  H   GLU A 709      -2.458  19.048  11.585  1.00  0.00           H
ATOM    222  HA  GLU A 709      -3.046  18.095  14.119  1.00  0.00           H
ATOM    223  HB2 GLU A 709      -4.932  17.175  13.123  1.00  0.00           H
ATOM    224  HB3 GLU A 709      -4.525  18.546  12.114  1.00  0.00           H
ATOM    225  HG2 GLU A 709      -3.300  17.015  10.575  1.00  0.00           H
ATOM    226  HG3 GLU A 709      -3.798  15.599  11.519  1.00  0.00           H
ATOM    227  N   THR A 710      -1.281  16.077  12.452  1.00 60.38           N
ATOM    228  CA  THR A 710      -0.738  14.769  12.457  1.00 58.89           C
ATOM    229  C   THR A 710       0.285  14.714  13.534  1.00 59.05           C
ATOM    230  O   THR A 710       0.907  13.706  13.726  1.00 60.10           O
ATOM    231  CB  THR A 710      -0.110  14.460  11.146  1.00 58.15           C
ATOM    232  OG1 THR A 710       1.072  15.212  11.006  1.00 56.42           O
ATOM    233  CG2 THR A 710      -0.995  14.867  10.090  1.00 57.96           C
ATOM    234  H   THR A 710      -0.875  16.790  11.864  1.00  0.00           H
ATOM    235  HA  THR A 710      -1.482  13.988  12.636  1.00  0.00           H
ATOM    236  HB  THR A 710       0.123  13.397  11.065  1.00  0.00           H
ATOM    237  HG1 THR A 710       1.681  14.923  11.669  1.00  0.00           H
ATOM    238 HG21 THR A 710      -0.620  14.503   9.133  1.00  0.00           H
ATOM    239 HG22 THR A 710      -1.993  14.441  10.210  1.00  0.00           H
ATOM    240 HG23 THR A 710      -1.096  15.948   9.974  1.00  0.00           H
ATOM    241  N   GLU A 711       0.465  15.801  14.254  1.00 57.98           N
ATOM    242  CA  GLU A 711       1.486  15.824  15.267  1.00 57.31           C
ATOM    243  C   GLU A 711       0.954  15.203  16.513  1.00 56.68           C
ATOM    244  O   GLU A 711       1.691  14.890  17.401  1.00 58.04           O
ATOM    245  CB  GLU A 711       1.936  17.242  15.540  1.00 58.23           C
ATOM    246  CG  GLU A 711       3.424  17.441  15.495  1.00 61.58           C
ATOM    247  CD  GLU A 711       3.840  18.889  15.429  1.00 66.81           C
ATOM    248  OE1 GLU A 711       4.767  19.285  16.137  1.00 67.11           O
ATOM    249  OE2 GLU A 711       3.274  19.644  14.644  1.00 67.22           O1-
ATOM    250  H   GLU A 711      -0.056  16.648  14.056  1.00  0.00           H
ATOM    251  HA  GLU A 711       2.355  15.242  14.950  1.00  0.00           H
ATOM    252  HB2 GLU A 711       1.553  17.906  14.796  1.00  0.00           H
ATOM    253  HB3 GLU A 711       1.550  17.635  16.482  1.00  0.00           H
ATOM    254  HG2 GLU A 711       3.846  16.994  16.394  1.00  0.00           H
ATOM    255  HG3 GLU A 711       3.881  16.902  14.671  1.00  0.00           H
ATOM    256  N   PHE A 712      -0.342  15.005  16.582  1.00 55.90           N
ATOM    257  CA  PHE A 712      -0.926  14.428  17.775  1.00 54.75           C
ATOM    258  C   PHE A 712      -2.032  13.463  17.443  1.00 54.37           C
ATOM    259  O   PHE A 712      -2.557  13.504  16.366  1.00 54.18           O
ATOM    260  CB  PHE A 712      -1.477  15.531  18.661  1.00 54.45           C
ATOM    261  CG  PHE A 712      -2.210  16.591  17.918  1.00 53.56           C
ATOM    262  CD1 PHE A 712      -3.571  16.564  17.808  1.00 51.59           C
ATOM    263  CD2 PHE A 712      -1.545  17.611  17.333  1.00 53.85           C
ATOM    264  CE1 PHE A 712      -4.231  17.519  17.133  1.00 50.73           C
ATOM    265  CE2 PHE A 712      -2.218  18.561  16.650  1.00 55.13           C
ATOM    266  CZ  PHE A 712      -3.560  18.509  16.556  1.00 53.23           C
ATOM    267  H   PHE A 712      -0.946  15.252  15.810  1.00  0.00           H
ATOM    268  HA  PHE A 712      -0.203  13.835  18.337  1.00  0.00           H
ATOM    269  HB2 PHE A 712      -2.142  15.162  19.441  1.00  0.00           H
ATOM    270  HB3 PHE A 712      -0.676  16.058  19.166  1.00  0.00           H
ATOM    271  HD1 PHE A 712      -4.132  15.760  18.263  1.00  0.00           H
ATOM    272  HD2 PHE A 712      -0.471  17.680  17.410  1.00  0.00           H
ATOM    273  HE1 PHE A 712      -5.308  17.480  17.054  1.00  0.00           H
ATOM    274  HE2 PHE A 712      -1.680  19.359  16.165  1.00  0.00           H
ATOM    275  HZ  PHE A 712      -4.093  19.273  16.009  1.00  0.00           H
ATOM    276  N   LYS A 713      -2.387  12.588  18.370  1.00 54.15           N
ATOM    277  CA  LYS A 713      -3.472  11.664  18.134  1.00 54.54           C
ATOM    278  C   LYS A 713      -4.432  11.703  19.290  1.00 53.87           C
ATOM    279  O   LYS A 713      -4.074  12.061  20.394  1.00 53.38           O
ATOM    280  CB  LYS A 713      -2.942  10.246  17.894  1.00 57.35           C
ATOM    281  CG  LYS A 713      -2.526   9.470  19.145  1.00 60.86           C
ATOM    282  CD  LYS A 713      -2.638   7.948  18.897  1.00 63.40           C
ATOM    283  CE  LYS A 713      -2.176   7.125  20.121  1.00 63.86           C
ATOM    284  NZ  LYS A 713      -1.071   6.167  19.781  1.00 65.16           N1+
ATOM    285  H   LYS A 713      -1.941  12.602  19.278  1.00  0.00           H
ATOM    286  HA  LYS A 713      -4.060  11.939  17.255  1.00  0.00           H
ATOM    287  HB2 LYS A 713      -3.743   9.694  17.399  1.00  0.00           H
ATOM    288  HB3 LYS A 713      -2.123  10.261  17.173  1.00  0.00           H
ATOM    289  HG2 LYS A 713      -1.506   9.744  19.416  1.00  0.00           H
ATOM    290  HG3 LYS A 713      -3.132   9.670  20.025  1.00  0.00           H
ATOM    291  HD2 LYS A 713      -3.671   7.687  18.661  1.00  0.00           H
ATOM    292  HD3 LYS A 713      -2.052   7.684  18.016  1.00  0.00           H
ATOM    293  HE2 LYS A 713      -1.821   7.776  20.921  1.00  0.00           H
ATOM    294  HE3 LYS A 713      -3.015   6.562  20.531  1.00  0.00           H
ATOM    295  HZ1 LYS A 713      -0.805   5.650  20.607  1.00  0.00           H
ATOM    296  HZ2 LYS A 713      -1.390   5.522  19.072  1.00  0.00           H
ATOM    297  HZ3 LYS A 713      -0.273   6.680  19.433  1.00  0.00           H
ATOM    298  N   LYS A 714      -5.665  11.329  19.025  1.00 54.03           N
ATOM    299  CA  LYS A 714      -6.699  11.420  20.031  1.00 54.63           C
ATOM    300  C   LYS A 714      -7.071  10.047  20.521  1.00 55.46           C
ATOM    301  O   LYS A 714      -7.416   9.161  19.741  1.00 55.75           O
ATOM    302  CB  LYS A 714      -7.939  12.120  19.474  1.00 54.01           C
ATOM    303  CG  LYS A 714      -7.647  13.477  18.909  1.00 53.39           C
ATOM    304  CD  LYS A 714      -8.840  13.992  18.235  1.00 53.19           C
ATOM    305  CE  LYS A 714      -8.507  15.115  17.292  1.00 56.58           C
ATOM    306  NZ  LYS A 714      -9.736  15.541  16.488  1.00 59.20           N1+
ATOM    307  H   LYS A 714      -5.917  11.015  18.099  1.00  0.00           H
ATOM    308  HA  LYS A 714      -6.392  12.021  20.890  1.00  0.00           H
ATOM    309  HB2 LYS A 714      -8.364  11.488  18.692  1.00  0.00           H
ATOM    310  HB3 LYS A 714      -8.707  12.189  20.243  1.00  0.00           H
ATOM    311  HG2 LYS A 714      -7.345  14.160  19.702  1.00  0.00           H
ATOM    312  HG3 LYS A 714      -6.820  13.434  18.200  1.00  0.00           H
ATOM    313  HD2 LYS A 714      -9.129  13.204  17.537  1.00  0.00           H
ATOM    314  HD3 LYS A 714      -9.729  14.024  18.795  1.00  0.00           H
ATOM    315  HE2 LYS A 714      -8.152  15.979  17.853  1.00  0.00           H
ATOM    316  HE3 LYS A 714      -7.715  14.835  16.595  1.00  0.00           H
ATOM    317  HZ1 LYS A 714      -9.505  16.327  15.895  1.00  0.00           H
ATOM    318  HZ2 LYS A 714     -10.057  14.776  15.913  1.00  0.00           H
ATOM    319  HZ3 LYS A 714     -10.478  15.817  17.115  1.00  0.00           H
ATOM    320  N   ILE A 715      -7.037   9.877  21.828  1.00 56.25           N
ATOM    321  CA  ILE A 715      -7.270   8.576  22.347  1.00 57.30           C
ATOM    322  C   ILE A 715      -8.677   8.477  22.760  1.00 57.47           C
ATOM    323  O   ILE A 715      -9.372   7.547  22.375  1.00 58.76           O
ATOM    324  CB  ILE A 715      -6.418   8.279  23.560  1.00 58.29           C
ATOM    325  CG1 ILE A 715      -4.960   8.081  23.137  1.00 59.10           C
ATOM    326  CG2 ILE A 715      -6.904   7.002  24.196  1.00 59.88           C
ATOM    327  CD1 ILE A 715      -4.250   9.371  22.831  1.00 59.02           C
ATOM    328  H   ILE A 715      -6.812  10.637  22.459  1.00  0.00           H
ATOM    329  HA  ILE A 715      -7.078   7.778  21.624  1.00  0.00           H
ATOM    330  HB  ILE A 715      -6.470   9.080  24.301  1.00  0.00           H
ATOM    331 HG12 ILE A 715      -4.401   7.592  23.936  1.00  0.00           H
ATOM    332 HG13 ILE A 715      -4.896   7.410  22.279  1.00  0.00           H
ATOM    333 HG21 ILE A 715      -6.171   6.631  24.913  1.00  0.00           H
ATOM    334 HG22 ILE A 715      -7.808   7.105  24.784  1.00  0.00           H
ATOM    335 HG23 ILE A 715      -7.049   6.202  23.468  1.00  0.00           H
ATOM    336 HD11 ILE A 715      -3.258   9.127  22.470  1.00  0.00           H
ATOM    337 HD12 ILE A 715      -4.653   9.917  21.990  1.00  0.00           H
ATOM    338 HD13 ILE A 715      -4.141   9.925  23.758  1.00  0.00           H
ATOM    339  N   LYS A 716      -9.111   9.380  23.594  1.00 57.45           N
ATOM    340  CA  LYS A 716     -10.435   9.262  24.125  1.00 58.15           C
ATOM    341  C   LYS A 716     -11.008  10.606  24.277  1.00 57.91           C
ATOM    342  O   LYS A 716     -10.309  11.558  24.157  1.00 59.71           O
ATOM    343  CB  LYS A 716     -10.401   8.555  25.452  1.00 59.25           C
ATOM    344  CG  LYS A 716     -10.237   9.444  26.603  1.00 60.57           C
ATOM    345  CD  LYS A 716     -11.280   9.168  27.619  1.00 62.77           C
ATOM    346  CE  LYS A 716     -10.730   8.408  28.770  1.00 64.45           C
ATOM    347  NZ  LYS A 716     -11.811   8.102  29.713  1.00 65.05           N1+
ATOM    348  H   LYS A 716      -8.527  10.155  23.878  1.00  0.00           H
ATOM    349  HA  LYS A 716     -11.110   8.732  23.448  1.00  0.00           H
ATOM    350  HB2 LYS A 716     -11.327   7.981  25.494  1.00  0.00           H
ATOM    351  HB3 LYS A 716      -9.650   7.772  25.481  1.00  0.00           H
ATOM    352  HG2 LYS A 716      -9.248   9.241  27.015  1.00  0.00           H
ATOM    353  HG3 LYS A 716     -10.200  10.522  26.508  1.00  0.00           H
ATOM    354  HD2 LYS A 716     -11.671  10.109  27.998  1.00  0.00           H
ATOM    355  HD3 LYS A 716     -12.168   8.675  27.221  1.00  0.00           H
ATOM    356  HE2 LYS A 716     -10.283   7.470  28.437  1.00  0.00           H
ATOM    357  HE3 LYS A 716      -9.956   8.980  29.285  1.00  0.00           H
ATOM    358  HZ1 LYS A 716     -11.442   7.582  30.496  1.00  0.00           H
ATOM    359  HZ2 LYS A 716     -12.226   8.961  30.044  1.00  0.00           H
ATOM    360  HZ3 LYS A 716     -12.516   7.548  29.248  1.00  0.00           H
ATOM    361  N   VAL A 717     -12.296  10.705  24.488  1.00 57.05           N
ATOM    362  CA  VAL A 717     -12.866  12.010  24.612  1.00 57.14           C
ATOM    363  C   VAL A 717     -13.257  12.193  26.059  1.00 57.99           C
ATOM    364  O   VAL A 717     -13.816  11.284  26.672  1.00 59.30           O
ATOM    365  CB  VAL A 717     -14.047  12.222  23.647  1.00 56.90           C
ATOM    366  CG1 VAL A 717     -13.932  11.285  22.482  1.00 57.34           C
ATOM    367  CG2 VAL A 717     -15.371  11.983  24.339  1.00 57.60           C
ATOM    368  H   VAL A 717     -12.886   9.891  24.577  1.00  0.00           H
ATOM    369  HA  VAL A 717     -12.194  12.823  24.378  1.00  0.00           H
ATOM    370  HB  VAL A 717     -14.028  13.250  23.281  1.00  0.00           H
ATOM    371 HG11 VAL A 717     -14.659  11.552  21.715  1.00  0.00           H
ATOM    372 HG12 VAL A 717     -12.956  11.321  22.004  1.00  0.00           H
ATOM    373 HG13 VAL A 717     -14.137  10.248  22.752  1.00  0.00           H
ATOM    374 HG21 VAL A 717     -16.179  12.062  23.611  1.00  0.00           H
ATOM    375 HG22 VAL A 717     -15.455  10.984  24.768  1.00  0.00           H
ATOM    376 HG23 VAL A 717     -15.612  12.732  25.096  1.00  0.00           H
ATOM    377  N   LEU A 718     -12.937  13.367  26.594  1.00 57.42           N
ATOM    378  CA  LEU A 718     -13.300  13.704  27.939  1.00 56.55           C
ATOM    379  C   LEU A 718     -14.623  14.401  27.899  1.00 57.79           C
ATOM    380  O   LEU A 718     -15.576  13.975  28.554  1.00 58.72           O
ATOM    381  CB  LEU A 718     -12.290  14.663  28.488  1.00 55.66           C
ATOM    382  CG  LEU A 718     -10.907  14.197  28.111  1.00 53.91           C
ATOM    383  CD1 LEU A 718      -9.925  15.240  28.510  1.00 52.96           C
ATOM    384  CD2 LEU A 718     -10.648  12.960  28.879  1.00 52.95           C
ATOM    385  H   LEU A 718     -12.484  14.070  26.025  1.00  0.00           H
ATOM    386  HA  LEU A 718     -13.365  12.826  28.586  1.00  0.00           H
ATOM    387  HB2 LEU A 718     -12.392  15.658  28.058  1.00  0.00           H
ATOM    388  HB3 LEU A 718     -12.411  14.789  29.566  1.00  0.00           H
ATOM    389  HG  LEU A 718     -10.720  14.047  27.048  1.00  0.00           H
ATOM    390 HD11 LEU A 718      -8.902  14.939  28.283  1.00  0.00           H
ATOM    391 HD12 LEU A 718     -10.098  16.180  27.987  1.00  0.00           H
ATOM    392 HD13 LEU A 718      -9.974  15.450  29.578  1.00  0.00           H
ATOM    393 HD21 LEU A 718      -9.596  12.783  29.081  1.00  0.00           H
ATOM    394 HD22 LEU A 718     -11.122  12.966  29.862  1.00  0.00           H
ATOM    395 HD23 LEU A 718     -11.021  12.096  28.341  1.00  0.00           H
ATOM    396  N   GLY A 719     -14.675  15.481  27.130  1.00 58.27           N
ATOM    397  CA  GLY A 719     -15.844  16.317  27.085  1.00 59.69           C
ATOM    398  C   GLY A 719     -16.331  16.476  25.669  1.00 60.99           C
ATOM    399  O   GLY A 719     -15.542  16.446  24.697  1.00 60.85           O
ATOM    400  H   GLY A 719     -13.872  15.749  26.579  1.00  0.00           H
ATOM    401  HA2 GLY A 719     -16.658  15.985  27.733  1.00  0.00           H
ATOM    402  HA3 GLY A 719     -15.603  17.332  27.392  1.00  0.00           H
ATOM    403  N   SER A 720     -17.641  16.585  25.540  1.00 61.95           N
ATOM    404  CA  SER A 720     -18.285  16.787  24.280  1.00 63.20           C
ATOM    405  C   SER A 720     -19.342  17.805  24.511  1.00 64.04           C
ATOM    406  O   SER A 720     -20.003  17.792  25.509  1.00 64.55           O
ATOM    407  CB  SER A 720     -18.932  15.511  23.822  1.00 63.06           C
ATOM    408  OG  SER A 720     -19.241  14.708  24.931  1.00 64.37           O
ATOM    409  H   SER A 720     -18.227  16.575  26.362  1.00  0.00           H
ATOM    410  HA  SER A 720     -17.610  17.155  23.508  1.00  0.00           H
ATOM    411  HB2 SER A 720     -19.818  15.670  23.204  1.00  0.00           H
ATOM    412  HB3 SER A 720     -18.225  14.952  23.207  1.00  0.00           H
ATOM    413  HG  SER A 720     -19.889  15.157  25.453  1.00  0.00           H
ATOM    414  N   GLY A 721     -19.504  18.702  23.573  1.00 64.97           N
ATOM    415  CA  GLY A 721     -20.476  19.743  23.705  1.00 65.66           C
ATOM    416  C   GLY A 721     -20.742  20.243  22.327  1.00 67.46           C
ATOM    417  O   GLY A 721     -20.021  19.919  21.416  1.00 67.64           O
ATOM    418  H   GLY A 721     -18.920  18.702  22.743  1.00  0.00           H
ATOM    419  HA2 GLY A 721     -21.413  19.373  24.128  1.00  0.00           H
ATOM    420  HA3 GLY A 721     -20.109  20.541  24.346  1.00  0.00           H
ATOM    421  N   ALA A 722     -21.777  21.041  22.183  1.00 68.69           N
ATOM    422  CA  ALA A 722     -22.152  21.600  20.909  1.00 68.43           C
ATOM    423  C   ALA A 722     -21.004  22.450  20.470  1.00 68.10           C
ATOM    424  O   ALA A 722     -20.747  22.628  19.294  1.00 68.40           O
ATOM    425  CB  ALA A 722     -23.371  22.420  21.061  1.00 68.06           C
ATOM    426  H   ALA A 722     -22.350  21.261  22.985  1.00  0.00           H
ATOM    427  HA  ALA A 722     -22.323  20.802  20.183  1.00  0.00           H
ATOM    428  HB1 ALA A 722     -23.669  22.864  20.110  1.00  0.00           H
ATOM    429  HB2 ALA A 722     -24.208  21.812  21.406  1.00  0.00           H
ATOM    430  HB3 ALA A 722     -23.238  23.232  21.778  1.00  0.00           H
ATOM    431  N   PHE A 723     -20.324  22.983  21.458  1.00 66.79           N
ATOM    432  CA  PHE A 723     -19.184  23.836  21.272  1.00 65.77           C
ATOM    433  C   PHE A 723     -18.121  23.089  20.552  1.00 65.18           C
ATOM    434  O   PHE A 723     -17.331  23.663  19.851  1.00 65.02           O
ATOM    435  CB  PHE A 723     -18.616  24.173  22.616  1.00 65.51           C
ATOM    436  CG  PHE A 723     -17.737  23.126  23.139  1.00 66.00           C
ATOM    437  CD1 PHE A 723     -16.549  22.867  22.533  1.00 65.50           C
ATOM    438  CD2 PHE A 723     -18.104  22.373  24.214  1.00 65.91           C
ATOM    439  CE1 PHE A 723     -15.741  21.901  23.007  1.00 64.52           C
ATOM    440  CE2 PHE A 723     -17.290  21.410  24.681  1.00 64.62           C
ATOM    441  CZ  PHE A 723     -16.112  21.178  24.077  1.00 64.92           C
ATOM    442  H   PHE A 723     -20.609  22.776  22.403  1.00  0.00           H
ATOM    443  HA  PHE A 723     -19.477  24.737  20.730  1.00  0.00           H
ATOM    444  HB2 PHE A 723     -18.022  25.085  22.533  1.00  0.00           H
ATOM    445  HB3 PHE A 723     -19.408  24.411  23.329  1.00  0.00           H
ATOM    446  HD1 PHE A 723     -16.082  23.533  21.821  1.00  0.00           H
ATOM    447  HD2 PHE A 723     -19.048  22.554  24.706  1.00  0.00           H
ATOM    448  HE1 PHE A 723     -14.785  21.718  22.538  1.00  0.00           H
ATOM    449  HE2 PHE A 723     -17.594  20.806  25.523  1.00  0.00           H
ATOM    450  HZ  PHE A 723     -15.548  20.351  24.423  1.00  0.00           H
ATOM    451  N   GLY A 724     -18.039  21.803  20.806  1.00 63.60           N
ATOM    452  CA  GLY A 724     -17.021  21.000  20.179  1.00 60.71           C
ATOM    453  C   GLY A 724     -16.782  19.741  20.948  1.00 58.77           C
ATOM    454  O   GLY A 724     -17.638  19.264  21.629  1.00 60.73           O
ATOM    455  H   GLY A 724     -18.712  21.345  21.406  1.00  0.00           H
ATOM    456  HA2 GLY A 724     -17.334  20.745  19.166  1.00  0.00           H
ATOM    457  HA3 GLY A 724     -16.083  21.547  20.102  1.00  0.00           H
ATOM    458  N   THR A 725     -15.604  19.187  20.797  1.00 55.36           N
ATOM    459  CA  THR A 725     -15.223  18.028  21.538  1.00 50.32           C
ATOM    460  C   THR A 725     -13.804  18.220  22.033  1.00 48.61           C
ATOM    461  O   THR A 725     -12.986  18.782  21.342  1.00 47.99           O
ATOM    462  CB  THR A 725     -15.310  16.860  20.645  1.00 49.25           C
ATOM    463  OG1 THR A 725     -16.642  16.773  20.162  1.00 49.63           O
ATOM    464  CG2 THR A 725     -15.019  15.666  21.372  1.00 48.72           C
ATOM    465  H   THR A 725     -14.908  19.632  20.209  1.00  0.00           H
ATOM    466  HA  THR A 725     -15.845  17.886  22.422  1.00  0.00           H
ATOM    467  HB  THR A 725     -14.638  16.956  19.789  1.00  0.00           H
ATOM    468  HG1 THR A 725     -16.848  17.579  19.714  1.00  0.00           H
ATOM    469 HG21 THR A 725     -15.197  14.793  20.743  1.00  0.00           H
ATOM    470 HG22 THR A 725     -13.978  15.584  21.684  1.00  0.00           H
ATOM    471 HG23 THR A 725     -15.652  15.546  22.252  1.00  0.00           H
ATOM    472  N   VAL A 726     -13.505  17.770  23.236  1.00 45.55           N
ATOM    473  CA  VAL A 726     -12.142  17.852  23.694  1.00 43.15           C
ATOM    474  C   VAL A 726     -11.608  16.480  23.934  1.00 41.88           C
ATOM    475  O   VAL A 726     -12.194  15.706  24.636  1.00 41.53           O
ATOM    476  CB  VAL A 726     -11.980  18.811  24.891  1.00 42.99           C
ATOM    477  CG1 VAL A 726     -13.275  19.031  25.562  1.00 40.64           C
ATOM    478  CG2 VAL A 726     -10.888  18.341  25.841  1.00 41.88           C
ATOM    479  H   VAL A 726     -14.195  17.293  23.804  1.00  0.00           H
ATOM    480  HA  VAL A 726     -11.533  18.269  22.936  1.00  0.00           H
ATOM    481  HB  VAL A 726     -11.664  19.781  24.505  1.00  0.00           H
ATOM    482 HG11 VAL A 726     -13.153  19.647  26.453  1.00  0.00           H
ATOM    483 HG12 VAL A 726     -13.894  19.593  24.899  1.00  0.00           H
ATOM    484 HG13 VAL A 726     -13.766  18.106  25.863  1.00  0.00           H
ATOM    485 HG21 VAL A 726     -10.715  19.089  26.614  1.00  0.00           H
ATOM    486 HG22 VAL A 726     -11.125  17.410  26.352  1.00  0.00           H
ATOM    487 HG23 VAL A 726      -9.935  18.216  25.325  1.00  0.00           H
ATOM    488  N   TYR A 727     -10.498  16.163  23.319  1.00 40.72           N
ATOM    489  CA  TYR A 727     -10.067  14.811  23.366  1.00 39.88           C
ATOM    490  C   TYR A 727      -8.963  14.750  24.303  1.00 39.38           C
ATOM    491  O   TYR A 727      -8.307  15.755  24.505  1.00 40.13           O
ATOM    492  CB  TYR A 727      -9.536  14.443  22.025  1.00 39.94           C
ATOM    493  CG  TYR A 727     -10.574  14.549  20.960  1.00 38.80           C
ATOM    494  CD1 TYR A 727     -11.464  13.518  20.735  1.00 37.29           C
ATOM    495  CD2 TYR A 727     -10.641  15.664  20.168  1.00 38.57           C
ATOM    496  CE1 TYR A 727     -12.386  13.597  19.756  1.00 38.58           C
ATOM    497  CE2 TYR A 727     -11.545  15.758  19.182  1.00 39.73           C
ATOM    498  CZ  TYR A 727     -12.436  14.725  18.977  1.00 39.68           C
ATOM    499  OH  TYR A 727     -13.370  14.843  17.972  1.00 38.97           O
ATOM    500  H   TYR A 727      -9.988  16.853  22.776  1.00  0.00           H
ATOM    501  HA  TYR A 727     -10.834  14.091  23.612  1.00  0.00           H
ATOM    502  HB2 TYR A 727      -8.670  15.040  21.747  1.00  0.00           H
ATOM    503  HB3 TYR A 727      -9.179  13.412  22.047  1.00  0.00           H
ATOM    504  HD1 TYR A 727     -11.400  12.631  21.345  1.00  0.00           H
ATOM    505  HD2 TYR A 727      -9.952  16.481  20.325  1.00  0.00           H
ATOM    506  HE1 TYR A 727     -13.077  12.784  19.590  1.00  0.00           H
ATOM    507  HE2 TYR A 727     -11.593  16.625  18.555  1.00  0.00           H
ATOM    508  HH  TYR A 727     -13.321  15.659  17.487  1.00  0.00           H
ATOM    509  N   LYS A 728      -8.759  13.575  24.876  1.00 38.75           N
ATOM    510  CA  LYS A 728      -7.524  13.277  25.580  1.00 39.15           C
ATOM    511  C   LYS A 728      -6.613  12.646  24.545  1.00 38.69           C
ATOM    512  O   LYS A 728      -7.045  11.773  23.773  1.00 39.39           O
ATOM    513  CB  LYS A 728      -7.792  12.292  26.693  1.00 40.24           C
ATOM    514  CG  LYS A 728      -6.538  11.752  27.338  1.00 42.91           C
ATOM    515  CD  LYS A 728      -6.861  10.561  28.228  1.00 47.14           C
ATOM    516  CE  LYS A 728      -5.742  10.376  29.244  1.00 51.99           C
ATOM    517  NZ  LYS A 728      -5.993   9.343  30.311  1.00 54.56           N1+
ATOM    518  H   LYS A 728      -9.370  12.799  24.642  1.00  0.00           H
ATOM    519  HA  LYS A 728      -7.064  14.173  26.002  1.00  0.00           H
ATOM    520  HB2 LYS A 728      -8.419  12.769  27.428  1.00  0.00           H
ATOM    521  HB3 LYS A 728      -8.342  11.454  26.277  1.00  0.00           H
ATOM    522  HG2 LYS A 728      -5.776  11.415  26.636  1.00  0.00           H
ATOM    523  HG3 LYS A 728      -6.087  12.562  27.911  1.00  0.00           H
ATOM    524  HD2 LYS A 728      -7.796  10.737  28.762  1.00  0.00           H
ATOM    525  HD3 LYS A 728      -6.997   9.659  27.631  1.00  0.00           H
ATOM    526  HE2 LYS A 728      -4.809  10.134  28.735  1.00  0.00           H
ATOM    527  HE3 LYS A 728      -5.578  11.310  29.770  1.00  0.00           H
ATOM    528  HZ1 LYS A 728      -5.213   9.331  30.954  1.00  0.00           H
ATOM    529  HZ2 LYS A 728      -6.839   9.565  30.815  1.00  0.00           H
ATOM    530  HZ3 LYS A 728      -6.077   8.430  29.886  1.00  0.00           H
ATOM    531  N   GLY A 729      -5.365  13.073  24.499  1.00 38.16           N
ATOM    532  CA  GLY A 729      -4.499  12.478  23.505  1.00 39.47           C
ATOM    533  C   GLY A 729      -3.029  12.621  23.747  1.00 40.04           C
ATOM    534  O   GLY A 729      -2.589  12.878  24.859  1.00 40.43           O
ATOM    535  H   GLY A 729      -5.019  13.803  25.110  1.00  0.00           H
ATOM    536  HA2 GLY A 729      -4.860  11.622  22.997  1.00  0.00           H
ATOM    537  HA3 GLY A 729      -4.643  13.197  22.698  1.00  0.00           H
ATOM    538  N   LEU A 730      -2.260  12.457  22.695  1.00 39.87           N
ATOM    539  CA  LEU A 730      -0.859  12.580  22.846  1.00 39.01           C
ATOM    540  C   LEU A 730      -0.369  13.508  21.808  1.00 40.39           C
ATOM    541  O   LEU A 730      -0.904  13.571  20.722  1.00 40.08           O
ATOM    542  CB  LEU A 730      -0.174  11.226  22.737  1.00 37.88           C
ATOM    543  CG  LEU A 730      -0.047  10.494  24.071  1.00 37.46           C
ATOM    544  CD1 LEU A 730      -1.340   9.850  24.448  1.00 40.76           C
ATOM    545  CD2 LEU A 730       0.968   9.432  23.969  1.00 37.19           C
ATOM    546  H   LEU A 730      -2.654  12.278  21.780  1.00  0.00           H
ATOM    547  HA  LEU A 730      -0.552  13.025  23.793  1.00  0.00           H
ATOM    548  HB2 LEU A 730      -0.655  10.598  21.984  1.00  0.00           H
ATOM    549  HB3 LEU A 730       0.837  11.400  22.359  1.00  0.00           H
ATOM    550  HG  LEU A 730       0.262  11.194  24.849  1.00  0.00           H
ATOM    551 HD11 LEU A 730      -1.192   9.275  25.363  1.00  0.00           H
ATOM    552 HD12 LEU A 730      -2.161  10.494  24.696  1.00  0.00           H
ATOM    553 HD13 LEU A 730      -1.639   9.123  23.702  1.00  0.00           H
ATOM    554 HD21 LEU A 730       1.647   9.455  24.821  1.00  0.00           H
ATOM    555 HD22 LEU A 730       0.544   8.427  23.941  1.00  0.00           H
ATOM    556 HD23 LEU A 730       1.548   9.513  23.057  1.00  0.00           H
ATOM    557  N   TRP A 731       0.639  14.274  22.164  1.00 42.01           N
ATOM    558  CA  TRP A 731       1.230  15.156  21.231  1.00 43.27           C
ATOM    559  C   TRP A 731       2.623  14.681  21.034  1.00 47.02           C
ATOM    560  O   TRP A 731       3.364  14.524  21.996  1.00 48.93           O
ATOM    561  CB  TRP A 731       1.259  16.538  21.788  1.00 40.74           C
ATOM    562  CG  TRP A 731       2.035  17.451  20.966  1.00 37.52           C
ATOM    563  CD1 TRP A 731       2.222  17.392  19.619  1.00 36.91           C
ATOM    564  CD2 TRP A 731       2.707  18.617  21.416  1.00 35.56           C
ATOM    565  NE1 TRP A 731       2.999  18.460  19.193  1.00 35.61           N
ATOM    566  CE3 TRP A 731       2.865  19.221  22.683  1.00 35.18           C
ATOM    567  CE2 TRP A 731       3.310  19.224  20.279  1.00 34.81           C
ATOM    568  CZ3 TRP A 731       3.606  20.411  22.783  1.00 34.85           C
ATOM    569  CZ2 TRP A 731       4.075  20.393  20.366  1.00 36.39           C
ATOM    570  CH2 TRP A 731       4.218  20.981  21.627  1.00 36.73           C
ATOM    571  H   TRP A 731       1.003  14.245  23.109  1.00  0.00           H
ATOM    572  HA  TRP A 731       0.760  15.150  20.258  1.00  0.00           H
ATOM    573  HB2 TRP A 731       0.246  16.933  21.869  1.00  0.00           H
ATOM    574  HB3 TRP A 731       1.663  16.543  22.797  1.00  0.00           H
ATOM    575  HD1 TRP A 731       1.792  16.657  18.967  1.00  0.00           H
ATOM    576  HE1 TRP A 731       3.281  18.621  18.234  1.00  0.00           H
ATOM    577  HE3 TRP A 731       2.413  18.783  23.560  1.00  0.00           H
ATOM    578  HZ3 TRP A 731       3.730  20.885  23.745  1.00  0.00           H
ATOM    579  HZ2 TRP A 731       4.535  20.826  19.490  1.00  0.00           H
ATOM    580  HH2 TRP A 731       4.802  21.883  21.728  1.00  0.00           H
ATOM    581  N   ILE A 732       3.023  14.443  19.806  1.00 50.51           N
ATOM    582  CA  ILE A 732       4.383  14.036  19.574  1.00 54.83           C
ATOM    583  C   ILE A 732       5.095  14.908  18.578  1.00 56.76           C
ATOM    584  O   ILE A 732       5.037  14.660  17.408  1.00 57.03           O
ATOM    585  CB  ILE A 732       4.423  12.637  19.053  1.00 55.70           C
ATOM    586  CG1 ILE A 732       3.486  11.758  19.864  1.00 56.79           C
ATOM    587  CG2 ILE A 732       5.811  12.128  19.139  1.00 56.41           C
ATOM    588  CD1 ILE A 732       2.409  11.126  19.056  1.00 54.85           C
ATOM    589  H   ILE A 732       2.412  14.586  19.010  1.00  0.00           H
ATOM    590  HA  ILE A 732       4.990  13.996  20.476  1.00  0.00           H
ATOM    591  HB  ILE A 732       4.092  12.583  18.013  1.00  0.00           H
ATOM    592 HG12 ILE A 732       4.044  10.906  20.255  1.00  0.00           H
ATOM    593 HG13 ILE A 732       3.089  12.170  20.786  1.00  0.00           H
ATOM    594 HG21 ILE A 732       5.940  11.342  18.395  1.00  0.00           H
ATOM    595 HG22 ILE A 732       6.605  12.848  18.940  1.00  0.00           H
ATOM    596 HG23 ILE A 732       6.039  11.645  20.080  1.00  0.00           H
ATOM    597 HD11 ILE A 732       1.805  10.456  19.669  1.00  0.00           H
ATOM    598 HD12 ILE A 732       1.740  11.881  18.639  1.00  0.00           H
ATOM    599 HD13 ILE A 732       2.817  10.544  18.229  1.00  0.00           H
ATOM    600  N   PRO A 733       5.824  15.897  19.048  1.00 58.83           N
ATOM    601  CA  PRO A 733       6.495  16.775  18.125  1.00 60.75           C
ATOM    602  C   PRO A 733       7.494  15.982  17.357  1.00 63.53           C
ATOM    603  O   PRO A 733       8.162  15.126  17.895  1.00 62.96           O
ATOM    604  CB  PRO A 733       7.170  17.773  19.038  1.00 59.51           C
ATOM    605  CG  PRO A 733       7.061  17.253  20.332  1.00 58.75           C
ATOM    606  CD  PRO A 733       5.899  16.433  20.400  1.00 58.08           C
ATOM    607  HA  PRO A 733       5.785  17.279  17.471  1.00  0.00           H
ATOM    608  HB2 PRO A 733       8.188  17.944  18.709  1.00  0.00           H
ATOM    609  HB3 PRO A 733       6.648  18.730  18.978  1.00  0.00           H
ATOM    610  HG2 PRO A 733       7.932  16.627  20.530  1.00  0.00           H
ATOM    611  HG3 PRO A 733       7.060  18.033  21.095  1.00  0.00           H
ATOM    612  HD2 PRO A 733       6.018  15.681  21.178  1.00  0.00           H
ATOM    613  HD3 PRO A 733       5.008  17.016  20.622  1.00  0.00           H
ATOM    614  N   GLU A 734       7.568  16.296  16.089  1.00 66.22           N
ATOM    615  CA  GLU A 734       8.421  15.560  15.216  1.00 68.34           C
ATOM    616  C   GLU A 734       9.825  15.763  15.652  1.00 68.85           C
ATOM    617  O   GLU A 734      10.202  16.814  16.113  1.00 68.52           O
ATOM    618  CB  GLU A 734       8.241  16.013  13.782  1.00 69.93           C
ATOM    619  CG  GLU A 734       7.110  15.364  13.064  1.00 73.59           C
ATOM    620  CD  GLU A 734       7.123  15.680  11.599  1.00 76.38           C
ATOM    621  OE1 GLU A 734       6.751  14.813  10.792  1.00 80.95           O
ATOM    622  OE2 GLU A 734       7.500  16.799  11.245  1.00 77.44           O1-
ATOM    623  H   GLU A 734       6.993  17.036  15.712  1.00  0.00           H
ATOM    624  HA  GLU A 734       8.174  14.497  15.291  1.00  0.00           H
ATOM    625  HB2 GLU A 734       8.139  17.100  13.752  1.00  0.00           H
ATOM    626  HB3 GLU A 734       9.153  15.794  13.220  1.00  0.00           H
ATOM    627  HG2 GLU A 734       7.164  14.281  13.182  1.00  0.00           H
ATOM    628  HG3 GLU A 734       6.158  15.681  13.492  1.00  0.00           H
ATOM    629  N   GLY A 735      10.607  14.705  15.451  1.00 68.94           N
ATOM    630  CA  GLY A 735      11.980  14.686  15.848  1.00 69.75           C
ATOM    631  C   GLY A 735      12.100  14.517  17.325  1.00 71.04           C
ATOM    632  O   GLY A 735      12.573  13.506  17.764  1.00 70.02           O
ATOM    633  H   GLY A 735      10.213  13.867  15.051  1.00  0.00           H
ATOM    634  HA2 GLY A 735      12.476  13.859  15.339  1.00  0.00           H
ATOM    635  HA3 GLY A 735      12.495  15.597  15.535  1.00  0.00           H
ATOM    636  N   GLU A 736      11.618  15.450  18.118  1.00 73.40           N
ATOM    637  CA  GLU A 736      11.762  15.220  19.525  1.00 74.14           C
ATOM    638  C   GLU A 736      10.951  13.989  19.697  1.00 73.71           C
ATOM    639  O   GLU A 736       9.852  13.891  19.179  1.00 74.29           O
ATOM    640  CB  GLU A 736      11.179  16.336  20.375  1.00 75.39           C
ATOM    641  CG  GLU A 736      11.032  17.686  19.709  1.00 77.83           C
ATOM    642  CD  GLU A 736      10.113  18.633  20.469  1.00 79.35           C
ATOM    643  OE1 GLU A 736       9.997  18.518  21.696  1.00 80.93           O
ATOM    644  OE2 GLU A 736       9.503  19.512  19.843  1.00 79.71           O1-
ATOM    645  H   GLU A 736      11.151  16.274  17.763  1.00  0.00           H
ATOM    646  HA  GLU A 736      12.813  15.071  19.787  1.00  0.00           H
ATOM    647  HB2 GLU A 736      10.195  16.052  20.756  1.00  0.00           H
ATOM    648  HB3 GLU A 736      11.792  16.445  21.271  1.00  0.00           H
ATOM    649  HG2 GLU A 736      12.006  18.156  19.574  1.00  0.00           H
ATOM    650  HG3 GLU A 736      10.582  17.600  18.721  1.00  0.00           H
ATOM    651  N   LYS A 737      11.485  13.026  20.402  1.00 72.49           N
ATOM    652  CA  LYS A 737      10.694  11.878  20.640  1.00 71.83           C
ATOM    653  C   LYS A 737      10.295  12.039  22.054  1.00 69.41           C
ATOM    654  O   LYS A 737      11.089  11.967  22.944  1.00 68.53           O
ATOM    655  CB  LYS A 737      11.506  10.621  20.431  1.00 74.19           C
ATOM    656  CG  LYS A 737      11.133   9.882  19.163  1.00 76.77           C
ATOM    657  CD  LYS A 737      12.121   8.791  18.845  1.00 77.47           C
ATOM    658  CE  LYS A 737      12.106   8.399  17.387  1.00 76.96           C
ATOM    659  NZ  LYS A 737      13.054   9.216  16.596  1.00 76.43           N1+
ATOM    660  H   LYS A 737      12.395  13.117  20.828  1.00  0.00           H
ATOM    661  HA  LYS A 737       9.786  11.767  20.040  1.00  0.00           H
ATOM    662  HB2 LYS A 737      12.571  10.860  20.430  1.00  0.00           H
ATOM    663  HB3 LYS A 737      11.375   9.918  21.257  1.00  0.00           H
ATOM    664  HG2 LYS A 737      10.121   9.480  19.227  1.00  0.00           H
ATOM    665  HG3 LYS A 737      11.127  10.605  18.345  1.00  0.00           H
ATOM    666  HD2 LYS A 737      13.135   9.071  19.135  1.00  0.00           H
ATOM    667  HD3 LYS A 737      11.873   7.922  19.456  1.00  0.00           H
ATOM    668  HE2 LYS A 737      12.418   7.359  17.288  1.00  0.00           H
ATOM    669  HE3 LYS A 737      11.103   8.467  16.963  1.00  0.00           H
ATOM    670  HZ1 LYS A 737      13.032   8.922  15.630  1.00  0.00           H
ATOM    671  HZ2 LYS A 737      12.791  10.190  16.656  1.00  0.00           H
ATOM    672  HZ3 LYS A 737      13.988   9.100  16.961  1.00  0.00           H
ATOM    673  N   VAL A 738       9.024  12.277  22.244  1.00 67.41           N
ATOM    674  CA  VAL A 738       8.452  12.370  23.544  1.00 63.56           C
ATOM    675  C   VAL A 738       7.037  12.273  23.213  1.00 61.23           C
ATOM    676  O   VAL A 738       6.675  12.558  22.107  1.00 60.47           O
ATOM    677  CB  VAL A 738       8.636  13.731  24.109  1.00 62.62           C
ATOM    678  CG1 VAL A 738      10.058  13.949  24.448  1.00 61.27           C
ATOM    679  CG2 VAL A 738       8.171  14.725  23.127  1.00 61.41           C
ATOM    680  H   VAL A 738       8.395  12.369  21.457  1.00  0.00           H
ATOM    681  HA  VAL A 738       8.766  11.564  24.213  1.00  0.00           H
ATOM    682  HB  VAL A 738       8.062  13.835  25.033  1.00  0.00           H
ATOM    683 HG11 VAL A 738      10.124  14.805  25.120  1.00  0.00           H
ATOM    684 HG12 VAL A 738      10.496  13.121  25.006  1.00  0.00           H
ATOM    685 HG13 VAL A 738      10.682  14.235  23.601  1.00  0.00           H
ATOM    686 HG21 VAL A 738       8.465  15.715  23.477  1.00  0.00           H
ATOM    687 HG22 VAL A 738       8.604  14.665  22.128  1.00  0.00           H
ATOM    688 HG23 VAL A 738       7.091  14.815  23.038  1.00  0.00           H
ATOM    689  N   LYS A 739       6.232  11.895  24.176  1.00 58.46           N
ATOM    690  CA  LYS A 739       4.823  11.952  24.003  1.00 55.65           C
ATOM    691  C   LYS A 739       4.340  12.822  25.099  1.00 53.52           C
ATOM    692  O   LYS A 739       4.474  12.488  26.236  1.00 54.23           O
ATOM    693  CB  LYS A 739       4.236  10.577  24.177  1.00 55.76           C
ATOM    694  CG  LYS A 739       5.138   9.478  23.739  1.00 57.04           C
ATOM    695  CD  LYS A 739       4.372   8.393  23.045  1.00 58.85           C
ATOM    696  CE  LYS A 739       5.148   7.861  21.875  1.00 59.51           C
ATOM    697  NZ  LYS A 739       5.195   6.397  21.866  1.00 59.54           N1+
ATOM    698  H   LYS A 739       6.597  11.679  25.093  1.00  0.00           H
ATOM    699  HA  LYS A 739       4.503  12.353  23.038  1.00  0.00           H
ATOM    700  HB2 LYS A 739       3.860  10.354  25.170  1.00  0.00           H
ATOM    701  HB3 LYS A 739       3.344  10.617  23.559  1.00  0.00           H
ATOM    702  HG2 LYS A 739       5.821   9.866  22.988  1.00  0.00           H
ATOM    703  HG3 LYS A 739       5.761   9.095  24.547  1.00  0.00           H
ATOM    704  HD2 LYS A 739       4.127   7.614  23.769  1.00  0.00           H
ATOM    705  HD3 LYS A 739       3.426   8.726  22.634  1.00  0.00           H
ATOM    706  HE2 LYS A 739       4.722   8.219  20.936  1.00  0.00           H
ATOM    707  HE3 LYS A 739       6.195   8.167  21.874  1.00  0.00           H
ATOM    708  HZ1 LYS A 739       5.726   6.079  21.068  1.00  0.00           H
ATOM    709  HZ2 LYS A 739       5.638   6.071  22.714  1.00  0.00           H
ATOM    710  HZ3 LYS A 739       4.257   6.027  21.817  1.00  0.00           H
ATOM    711  N   ILE A 740       3.744  13.936  24.752  1.00 50.69           N
ATOM    712  CA  ILE A 740       3.124  14.799  25.730  1.00 47.99           C
ATOM    713  C   ILE A 740       1.626  14.607  25.767  1.00 46.20           C
ATOM    714  O   ILE A 740       0.948  14.791  24.757  1.00 45.31           O
ATOM    715  CB  ILE A 740       3.341  16.221  25.392  1.00 47.82           C
ATOM    716  CG1 ILE A 740       4.752  16.617  25.740  1.00 46.31           C
ATOM    717  CG2 ILE A 740       2.377  17.066  26.160  1.00 47.96           C
ATOM    718  CD1 ILE A 740       5.568  16.790  24.570  1.00 47.21           C
ATOM    719  H   ILE A 740       3.656  14.177  23.772  1.00  0.00           H
ATOM    720  HA  ILE A 740       3.562  14.610  26.667  1.00  0.00           H
ATOM    721  HB  ILE A 740       3.155  16.389  24.332  1.00  0.00           H
ATOM    722 HG12 ILE A 740       4.864  17.421  26.469  1.00  0.00           H
ATOM    723 HG13 ILE A 740       5.284  15.750  26.053  1.00  0.00           H
ATOM    724 HG21 ILE A 740       2.543  18.111  25.897  1.00  0.00           H
ATOM    725 HG22 ILE A 740       1.318  16.955  26.122  1.00  0.00           H
ATOM    726 HG23 ILE A 740       2.628  16.993  27.213  1.00  0.00           H
ATOM    727 HD11 ILE A 740       6.629  16.786  24.821  1.00  0.00           H
ATOM    728 HD12 ILE A 740       5.408  15.992  23.845  1.00  0.00           H
ATOM    729 HD13 ILE A 740       5.326  17.725  24.064  1.00  0.00           H
ATOM    730  N   PRO A 741       1.114  14.236  26.938  1.00 45.06           N
ATOM    731  CA  PRO A 741      -0.325  14.045  27.169  1.00 44.38           C
ATOM    732  C   PRO A 741      -1.058  15.375  27.173  1.00 42.67           C
ATOM    733  O   PRO A 741      -0.647  16.337  27.851  1.00 42.68           O
ATOM    734  CB  PRO A 741      -0.383  13.400  28.569  1.00 44.39           C
ATOM    735  CG  PRO A 741       0.881  13.770  29.211  1.00 44.36           C
ATOM    736  CD  PRO A 741       1.905  13.776  28.090  1.00 45.07           C
ATOM    737  HA  PRO A 741      -0.735  13.363  26.426  1.00  0.00           H
ATOM    738  HB2 PRO A 741      -1.251  13.698  29.158  1.00  0.00           H
ATOM    739  HB3 PRO A 741      -0.430  12.315  28.461  1.00  0.00           H
ATOM    740  HG2 PRO A 741       0.791  14.767  29.644  1.00  0.00           H
ATOM    741  HG3 PRO A 741       1.156  13.091  30.018  1.00  0.00           H
ATOM    742  HD2 PRO A 741       2.692  14.445  28.434  1.00  0.00           H
ATOM    743  HD3 PRO A 741       2.313  12.780  27.910  1.00  0.00           H
ATOM    744  N   VAL A 742      -2.111  15.447  26.393  1.00 39.77           N
ATOM    745  CA  VAL A 742      -2.658  16.720  26.170  1.00 38.21           C
ATOM    746  C   VAL A 742      -4.115  16.549  26.037  1.00 38.54           C
ATOM    747  O   VAL A 742      -4.617  15.447  25.863  1.00 37.76           O
ATOM    748  CB  VAL A 742      -2.138  17.327  24.852  1.00 37.86           C
ATOM    749  CG1 VAL A 742      -0.702  17.689  24.967  1.00 36.60           C
ATOM    750  CG2 VAL A 742      -2.328  16.378  23.714  1.00 34.71           C
ATOM    751  H   VAL A 742      -2.435  14.654  25.855  1.00  0.00           H
ATOM    752  HA  VAL A 742      -2.511  17.428  26.981  1.00  0.00           H
ATOM    753  HB  VAL A 742      -2.680  18.243  24.619  1.00  0.00           H
ATOM    754 HG11 VAL A 742      -0.460  18.435  24.211  1.00  0.00           H
ATOM    755 HG12 VAL A 742      -0.458  18.124  25.936  1.00  0.00           H
ATOM    756 HG13 VAL A 742      -0.089  16.845  24.716  1.00  0.00           H
ATOM    757 HG21 VAL A 742      -2.012  16.842  22.779  1.00  0.00           H
ATOM    758 HG22 VAL A 742      -1.743  15.464  23.820  1.00  0.00           H
ATOM    759 HG23 VAL A 742      -3.363  16.088  23.569  1.00  0.00           H
ATOM    760  N   ALA A 743      -4.786  17.681  26.069  1.00 38.58           N
ATOM    761  CA  ALA A 743      -6.175  17.737  25.781  1.00 38.96           C
ATOM    762  C   ALA A 743      -6.336  18.557  24.514  1.00 40.10           C
ATOM    763  O   ALA A 743      -5.899  19.694  24.440  1.00 40.72           O
ATOM    764  CB  ALA A 743      -6.849  18.382  26.869  1.00 38.15           C
ATOM    765  H   ALA A 743      -4.286  18.553  26.204  1.00  0.00           H
ATOM    766  HA  ALA A 743      -6.600  16.749  25.675  1.00  0.00           H
ATOM    767  HB1 ALA A 743      -7.919  18.477  26.679  1.00  0.00           H
ATOM    768  HB2 ALA A 743      -6.743  17.803  27.788  1.00  0.00           H
ATOM    769  HB3 ALA A 743      -6.460  19.382  27.073  1.00  0.00           H
ATOM    770  N   ILE A 744      -6.964  17.971  23.511  1.00 41.40           N
ATOM    771  CA  ILE A 744      -7.156  18.641  22.267  1.00 42.36           C
ATOM    772  C   ILE A 744      -8.567  19.070  22.265  1.00 44.06           C
ATOM    773  O   ILE A 744      -9.422  18.254  22.436  1.00 46.30           O
ATOM    774  CB  ILE A 744      -6.948  17.666  21.119  1.00 41.90           C
ATOM    775  CG1 ILE A 744      -5.495  17.187  21.141  1.00 41.73           C
ATOM    776  CG2 ILE A 744      -7.316  18.317  19.788  1.00 38.49           C
ATOM    777  CD1 ILE A 744      -5.306  15.816  21.720  1.00 41.37           C
ATOM    778  H   ILE A 744      -7.352  17.044  23.634  1.00  0.00           H
ATOM    779  HA  ILE A 744      -6.496  19.499  22.120  1.00  0.00           H
ATOM    780  HB  ILE A 744      -7.597  16.801  21.227  1.00  0.00           H
ATOM    781 HG12 ILE A 744      -5.113  17.152  20.122  1.00  0.00           H
ATOM    782 HG13 ILE A 744      -4.843  17.896  21.653  1.00  0.00           H
ATOM    783 HG21 ILE A 744      -7.024  17.681  18.953  1.00  0.00           H
ATOM    784 HG22 ILE A 744      -8.386  18.492  19.671  1.00  0.00           H
ATOM    785 HG23 ILE A 744      -6.800  19.269  19.658  1.00  0.00           H
ATOM    786 HD11 ILE A 744      -4.275  15.485  21.594  1.00  0.00           H
ATOM    787 HD12 ILE A 744      -5.548  15.782  22.782  1.00  0.00           H
ATOM    788 HD13 ILE A 744      -5.934  15.082  21.218  1.00  0.00           H
ATOM    789  N   LYS A 745      -8.830  20.331  22.022  1.00 46.41           N
ATOM    790  CA  LYS A 745     -10.177  20.807  21.932  1.00 48.43           C
ATOM    791  C   LYS A 745     -10.430  21.120  20.503  1.00 50.51           C
ATOM    792  O   LYS A 745      -9.840  22.010  19.967  1.00 50.60           O
ATOM    793  CB  LYS A 745     -10.286  22.078  22.720  1.00 48.73           C
ATOM    794  CG  LYS A 745     -11.604  22.711  22.689  1.00 48.92           C
ATOM    795  CD  LYS A 745     -11.883  23.323  23.989  1.00 51.83           C
ATOM    796  CE  LYS A 745     -12.007  24.781  23.868  1.00 55.03           C
ATOM    797  NZ  LYS A 745     -12.120  25.405  25.190  1.00 56.16           N1+
ATOM    798  H   LYS A 745      -8.072  20.985  21.876  1.00  0.00           H
ATOM    799  HA  LYS A 745     -10.930  20.124  22.304  1.00  0.00           H
ATOM    800  HB2 LYS A 745     -10.005  21.774  23.729  1.00  0.00           H
ATOM    801  HB3 LYS A 745      -9.525  22.807  22.430  1.00  0.00           H
ATOM    802  HG2 LYS A 745     -11.680  23.411  21.855  1.00  0.00           H
ATOM    803  HG3 LYS A 745     -12.373  21.957  22.508  1.00  0.00           H
ATOM    804  HD2 LYS A 745     -12.825  22.926  24.372  1.00  0.00           H
ATOM    805  HD3 LYS A 745     -11.152  23.096  24.766  1.00  0.00           H
ATOM    806  HE2 LYS A 745     -11.145  25.209  23.367  1.00  0.00           H
ATOM    807  HE3 LYS A 745     -12.882  25.049  23.273  1.00  0.00           H
ATOM    808  HZ1 LYS A 745     -12.123  26.413  25.082  1.00  0.00           H
ATOM    809  HZ2 LYS A 745     -12.973  25.114  25.645  1.00  0.00           H
ATOM    810  HZ3 LYS A 745     -11.328  25.147  25.760  1.00  0.00           H
ATOM    811  N   GLU A 746     -11.339  20.387  19.896  1.00 53.04           N
ATOM    812  CA  GLU A 746     -11.688  20.556  18.511  1.00 55.97           C
ATOM    813  C   GLU A 746     -12.966  21.290  18.550  1.00 57.42           C
ATOM    814  O   GLU A 746     -13.858  20.899  19.254  1.00 57.06           O
ATOM    815  CB  GLU A 746     -11.922  19.214  17.855  1.00 57.08           C
ATOM    816  CG  GLU A 746     -11.748  19.189  16.346  1.00 61.45           C
ATOM    817  CD  GLU A 746     -12.245  17.907  15.718  1.00 64.09           C
ATOM    818  OE1 GLU A 746     -11.809  17.557  14.617  1.00 65.83           O
ATOM    819  OE2 GLU A 746     -13.087  17.244  16.328  1.00 65.77           O1-
ATOM    820  H   GLU A 746     -11.846  19.686  20.424  1.00  0.00           H
ATOM    821  HA  GLU A 746     -10.921  21.098  17.954  1.00  0.00           H
ATOM    822  HB2 GLU A 746     -11.129  18.574  18.236  1.00  0.00           H
ATOM    823  HB3 GLU A 746     -12.859  18.767  18.194  1.00  0.00           H
ATOM    824  HG2 GLU A 746     -12.329  19.997  15.901  1.00  0.00           H
ATOM    825  HG3 GLU A 746     -10.717  19.374  16.062  1.00  0.00           H
ATOM    826  N   LEU A 747     -13.051  22.367  17.797  1.00 60.50           N
ATOM    827  CA  LEU A 747     -14.191  23.238  17.838  1.00 63.24           C
ATOM    828  C   LEU A 747     -15.047  23.113  16.627  1.00 66.02           C
ATOM    829  O   LEU A 747     -14.571  22.956  15.545  1.00 65.73           O
ATOM    830  CB  LEU A 747     -13.735  24.667  17.968  1.00 63.09           C
ATOM    831  CG  LEU A 747     -13.229  25.023  19.345  1.00 63.86           C
ATOM    832  CD1 LEU A 747     -11.872  25.589  19.247  1.00 64.90           C
ATOM    833  CD2 LEU A 747     -14.150  26.000  19.973  1.00 64.83           C
ATOM    834  H   LEU A 747     -12.267  22.633  17.215  1.00  0.00           H
ATOM    835  HA  LEU A 747     -14.822  23.035  18.706  1.00  0.00           H
ATOM    836  HB2 LEU A 747     -12.972  24.856  17.209  1.00  0.00           H
ATOM    837  HB3 LEU A 747     -14.546  25.345  17.689  1.00  0.00           H
ATOM    838  HG  LEU A 747     -13.180  24.137  19.980  1.00  0.00           H
ATOM    839 HD11 LEU A 747     -11.495  25.894  20.224  1.00  0.00           H
ATOM    840 HD12 LEU A 747     -11.169  24.856  18.848  1.00  0.00           H
ATOM    841 HD13 LEU A 747     -11.845  26.457  18.594  1.00  0.00           H
ATOM    842 HD21 LEU A 747     -13.809  26.281  20.970  1.00  0.00           H
ATOM    843 HD22 LEU A 747     -14.239  26.911  19.386  1.00  0.00           H
ATOM    844 HD23 LEU A 747     -15.150  25.579  20.084  1.00  0.00           H
ATOM    845  N   ARG A 748     -16.339  23.237  16.842  1.00 70.24           N
ATOM    846  CA  ARG A 748     -17.329  23.124  15.807  1.00 74.27           C
ATOM    847  C   ARG A 748     -17.179  24.228  14.801  1.00 75.00           C
ATOM    848  O   ARG A 748     -16.789  25.324  15.110  1.00 74.07           O
ATOM    849  CB  ARG A 748     -18.720  23.152  16.415  1.00 75.07           C
ATOM    850  CG  ARG A 748     -19.774  22.461  15.579  1.00 77.07           C
ATOM    851  CD  ARG A 748     -21.215  22.424  16.088  1.00 -1.00           C
ATOM    852  NE  ARG A 748     -22.113  21.720  15.167  1.00 -1.00           N
ATOM    853  CZ  ARG A 748     -22.765  22.299  14.142  1.00 -1.00           C
ATOM    854  NH1 ARG A 748     -22.666  23.630  13.935  1.00 -1.00           N
ATOM    855  NH2 ARG A 748     -23.521  21.521  13.342  1.00 -1.00           N1+
ATOM    856  H   ARG A 748     -16.664  23.405  17.785  1.00  0.00           H
ATOM    857  HA  ARG A 748     -17.173  22.158  15.320  1.00  0.00           H
ATOM    858  HB2 ARG A 748     -18.696  22.636  17.377  1.00  0.00           H
ATOM    859  HB3 ARG A 748     -19.031  24.173  16.645  1.00  0.00           H
ATOM    860  HG2 ARG A 748     -19.841  22.945  14.605  1.00  0.00           H
ATOM    861  HG3 ARG A 748     -19.504  21.413  15.446  1.00  0.00           H
ATOM    862  HD2 ARG A 748     -21.248  21.910  17.049  1.00 -1.00           H
ATOM    863  HD3 ARG A 748     -21.585  23.442  16.208  1.00 -1.00           H
ATOM    864  HE  ARG A 748     -22.226  20.732  15.344  1.00 -1.00           H
ATOM    865 HH11 ARG A 748     -23.157  24.060  13.165  1.00 -1.00           H
ATOM    866 HH12 ARG A 748     -22.100  24.196  14.552  1.00 -1.00           H
ATOM    867 HH21 ARG A 748     -24.022  21.931  12.566  1.00 -1.00           H
ATOM    868 HH22 ARG A 748     -23.588  20.529  13.518  1.00 -1.00           H
ATOM    869  N   GLU A 749     -17.505  23.913  13.573  1.00 76.87           N
ATOM    870  CA  GLU A 749     -17.215  24.766  12.458  1.00 79.23           C
ATOM    871  C   GLU A 749     -17.650  26.152  12.759  1.00 79.70           C
ATOM    872  O   GLU A 749     -18.646  26.355  13.407  1.00 80.51           O
ATOM    873  CB  GLU A 749     -18.043  24.278  11.293  1.00 80.49           C
ATOM    874  CG  GLU A 749     -17.537  24.714   9.985  1.00 83.19           C
ATOM    875  CD  GLU A 749     -16.285  24.010   9.617  1.00 85.21           C
ATOM    876  OE1 GLU A 749     -15.227  24.479  10.039  1.00 86.21           O
ATOM    877  OE2 GLU A 749     -16.354  22.986   8.918  1.00 85.22           O1-
ATOM    878  H   GLU A 749     -17.852  22.986  13.378  1.00  0.00           H
ATOM    879  HA  GLU A 749     -16.139  24.721  12.292  1.00  0.00           H
ATOM    880  HB2 GLU A 749     -18.074  23.186  11.297  1.00  0.00           H
ATOM    881  HB3 GLU A 749     -19.090  24.574  11.394  1.00  0.00           H
ATOM    882  HG2 GLU A 749     -18.284  24.494   9.222  1.00  0.00           H
ATOM    883  HG3 GLU A 749     -17.383  25.793   9.943  1.00  0.00           H
ATOM    884  N   ALA A 750     -16.860  27.120  12.328  1.00 79.62           N
ATOM    885  CA  ALA A 750     -17.209  28.522  12.555  1.00 79.95           C
ATOM    886  C   ALA A 750     -18.233  28.964  11.514  1.00 80.47           C
ATOM    887  O   ALA A 750     -17.980  28.925  10.298  1.00 79.84           O
ATOM    888  CB  ALA A 750     -15.996  29.397  12.528  1.00 79.57           C
ATOM    889  H   ALA A 750     -16.030  26.899  11.795  1.00  0.00           H
ATOM    890  HA  ALA A 750     -17.631  28.631  13.558  1.00  0.00           H
ATOM    891  HB1 ALA A 750     -16.233  30.429  12.787  1.00  0.00           H
ATOM    892  HB2 ALA A 750     -15.216  29.033  13.198  1.00  0.00           H
ATOM    893  HB3 ALA A 750     -15.649  29.358  11.501  1.00  0.00           H
ATOM    894  N   THR A 751     -19.400  29.343  12.036  1.00 81.17           N
ATOM    895  CA  THR A 751     -20.587  29.812  11.286  1.00 81.14           C
ATOM    896  C   THR A 751     -20.408  31.207  10.700  1.00 80.17           C
ATOM    897  O   THR A 751     -20.890  31.515   9.605  1.00 79.83           O
ATOM    898  CB  THR A 751     -21.792  29.923  12.247  1.00 81.63           C
ATOM    899  OG1 THR A 751     -21.977  28.671  12.913  1.00 83.41           O
ATOM    900  CG2 THR A 751     -23.063  30.303  11.507  1.00 83.08           C
ATOM    901  H   THR A 751     -19.513  29.258  13.036  1.00  0.00           H
ATOM    902  HA  THR A 751     -20.803  29.103  10.484  1.00  0.00           H
ATOM    903  HB  THR A 751     -21.599  30.662  13.027  1.00  0.00           H
ATOM    904  HG1 THR A 751     -22.717  28.743  13.497  1.00  0.00           H
ATOM    905 HG21 THR A 751     -23.928  30.219  12.166  1.00  0.00           H
ATOM    906 HG22 THR A 751     -23.058  31.332  11.148  1.00  0.00           H
ATOM    907 HG23 THR A 751     -23.241  29.646  10.654  1.00  0.00           H
ATOM    908  N   SER A 752     -19.734  32.053  11.467  1.00 78.81           N
ATOM    909  CA  SER A 752     -19.453  33.397  11.051  1.00 77.58           C
ATOM    910  C   SER A 752     -17.976  33.644  11.273  1.00 77.01           C
ATOM    911  O   SER A 752     -17.347  32.983  12.099  1.00 76.90           O
ATOM    912  CB  SER A 752     -20.229  34.364  11.917  1.00 77.43           C
ATOM    913  OG  SER A 752     -19.555  34.482  13.150  1.00 78.07           O
ATOM    914  H   SER A 752     -19.332  31.726  12.333  1.00  0.00           H
ATOM    915  HA  SER A 752     -19.765  33.526  10.022  1.00  0.00           H
ATOM    916  HB2 SER A 752     -20.265  35.349  11.449  1.00  0.00           H
ATOM    917  HB3 SER A 752     -21.259  34.041  12.073  1.00  0.00           H
ATOM    918  HG  SER A 752     -19.632  33.651  13.597  1.00  0.00           H
ATOM    919  N   PRO A 753     -17.418  34.592  10.522  1.00 76.51           N
ATOM    920  CA  PRO A 753     -16.117  35.169  10.787  1.00 76.12           C
ATOM    921  C   PRO A 753     -15.999  35.581  12.233  1.00 75.42           C
ATOM    922  O   PRO A 753     -14.961  35.350  12.849  1.00 75.53           O
ATOM    923  CB  PRO A 753     -16.108  36.429   9.910  1.00 76.38           C
ATOM    924  CG  PRO A 753     -17.234  36.238   8.896  1.00 76.67           C
ATOM    925  CD  PRO A 753     -17.844  34.878   9.148  1.00 76.45           C
ATOM    926  HA  PRO A 753     -15.330  34.468  10.502  1.00  0.00           H
ATOM    927  HB2 PRO A 753     -16.266  37.359  10.460  1.00  0.00           H
ATOM    928  HB3 PRO A 753     -15.146  36.526   9.406  1.00  0.00           H
ATOM    929  HG2 PRO A 753     -17.986  37.014   9.049  1.00  0.00           H
ATOM    930  HG3 PRO A 753     -16.882  36.334   7.868  1.00  0.00           H
ATOM    931  HD2 PRO A 753     -18.911  34.983   8.966  1.00  0.00           H
ATOM    932  HD3 PRO A 753     -17.439  34.125   8.470  1.00  0.00           H
ATOM    933  N   LYS A 754     -17.049  36.186  12.780  1.00 74.70           N
ATOM    934  CA  LYS A 754     -16.977  36.657  14.162  1.00 74.70           C
ATOM    935  C   LYS A 754     -16.712  35.493  15.111  1.00 73.57           C
ATOM    936  O   LYS A 754     -15.771  35.521  15.924  1.00 73.78           O
ATOM    937  CB  LYS A 754     -18.260  37.391  14.587  1.00 75.20           C
ATOM    938  CG  LYS A 754     -18.201  38.018  16.015  1.00 77.09           C
ATOM    939  CD  LYS A 754     -17.816  39.550  15.941  1.00 80.33           C
ATOM    940  CE  LYS A 754     -18.114  40.281  17.275  1.00 81.19           C
ATOM    941  NZ  LYS A 754     -17.803  41.765  17.187  1.00 80.89           N1+
ATOM    942  H   LYS A 754     -17.894  36.337  12.248  1.00  0.00           H
ATOM    943  HA  LYS A 754     -16.150  37.365  14.236  1.00  0.00           H
ATOM    944  HB2 LYS A 754     -18.508  38.155  13.850  1.00  0.00           H
ATOM    945  HB3 LYS A 754     -19.100  36.697  14.557  1.00  0.00           H
ATOM    946  HG2 LYS A 754     -19.198  37.941  16.450  1.00  0.00           H
ATOM    947  HG3 LYS A 754     -17.541  37.488  16.700  1.00  0.00           H
ATOM    948  HD2 LYS A 754     -16.763  39.653  15.675  1.00  0.00           H
ATOM    949  HD3 LYS A 754     -18.387  40.035  15.148  1.00  0.00           H
ATOM    950  HE2 LYS A 754     -19.165  40.165  17.544  1.00  0.00           H
ATOM    951  HE3 LYS A 754     -17.526  39.844  18.083  1.00  0.00           H
ATOM    952  HZ1 LYS A 754     -18.014  42.206  18.071  1.00  0.00           H
ATOM    953  HZ2 LYS A 754     -16.825  41.895  16.972  1.00  0.00           H
ATOM    954  HZ3 LYS A 754     -18.367  42.186  16.462  1.00  0.00           H
ATOM    955  N   ALA A 755     -17.546  34.469  15.002  1.00 72.05           N
ATOM    956  CA  ALA A 755     -17.348  33.299  15.833  1.00 71.26           C
ATOM    957  C   ALA A 755     -15.884  32.872  15.731  1.00 70.81           C
ATOM    958  O   ALA A 755     -15.214  32.697  16.739  1.00 70.93           O
ATOM    959  CB  ALA A 755     -18.261  32.190  15.373  1.00 71.36           C
ATOM    960  H   ALA A 755     -18.290  34.491  14.316  1.00  0.00           H
ATOM    961  HA  ALA A 755     -17.603  33.548  16.862  1.00  0.00           H
ATOM    962  HB1 ALA A 755     -18.142  31.304  15.998  1.00  0.00           H
ATOM    963  HB2 ALA A 755     -19.307  32.492  15.439  1.00  0.00           H
ATOM    964  HB3 ALA A 755     -18.070  31.888  14.343  1.00  0.00           H
ATOM    965  N   ASN A 756     -15.397  32.755  14.499  1.00 70.06           N
ATOM    966  CA  ASN A 756     -14.033  32.364  14.209  1.00 69.42           C
ATOM    967  C   ASN A 756     -13.037  33.340  14.784  1.00 69.73           C
ATOM    968  O   ASN A 756     -12.025  32.928  15.342  1.00 69.72           O
ATOM    969  CB  ASN A 756     -13.819  32.284  12.703  1.00 69.10           C
ATOM    970  CG  ASN A 756     -13.191  31.005  12.293  1.00 68.19           C
ATOM    971  OD1 ASN A 756     -13.640  30.370  11.358  1.00 68.46           O
ATOM    972  ND2 ASN A 756     -12.171  30.589  13.011  1.00 67.00           N
ATOM    973  H   ASN A 756     -16.010  32.941  13.716  1.00  0.00           H
ATOM    974  HA  ASN A 756     -13.921  31.380  14.656  1.00  0.00           H
ATOM    975  HB2 ASN A 756     -14.771  32.362  12.176  1.00  0.00           H
ATOM    976  HB3 ASN A 756     -13.216  33.103  12.306  1.00  0.00           H
ATOM    977 HD21 ASN A 756     -11.832  31.143  13.785  1.00  0.00           H
ATOM    978 HD22 ASN A 756     -11.724  29.715  12.775  1.00  0.00           H
ATOM    979  N   LYS A 757     -13.306  34.637  14.641  1.00 70.09           N
ATOM    980  CA  LYS A 757     -12.386  35.626  15.178  1.00 70.27           C
ATOM    981  C   LYS A 757     -12.205  35.425  16.695  1.00 70.23           C
ATOM    982  O   LYS A 757     -11.081  35.466  17.203  1.00 71.09           O
ATOM    983  CB  LYS A 757     -12.841  37.049  14.875  1.00 71.05           C
ATOM    984  CG  LYS A 757     -12.474  37.973  16.040  1.00 73.81           C
ATOM    985  CD  LYS A 757     -11.877  39.306  15.587  1.00 75.56           C
ATOM    986  CE  LYS A 757     -11.360  40.080  16.824  1.00 75.92           C
ATOM    987  NZ  LYS A 757     -11.083  41.494  16.456  1.00 75.59           N1+
ATOM    988  H   LYS A 757     -14.124  34.941  14.123  1.00  0.00           H
ATOM    989  HA  LYS A 757     -11.408  35.480  14.715  1.00  0.00           H
ATOM    990  HB2 LYS A 757     -12.379  37.377  13.943  1.00  0.00           H
ATOM    991  HB3 LYS A 757     -13.916  37.101  14.713  1.00  0.00           H
ATOM    992  HG2 LYS A 757     -13.315  38.113  16.721  1.00  0.00           H
ATOM    993  HG3 LYS A 757     -11.607  37.702  16.633  1.00  0.00           H
ATOM    994  HD2 LYS A 757     -11.060  39.149  14.881  1.00  0.00           H
ATOM    995  HD3 LYS A 757     -12.645  39.881  15.067  1.00  0.00           H
ATOM    996  HE2 LYS A 757     -12.104  40.076  17.622  1.00  0.00           H
ATOM    997  HE3 LYS A 757     -10.453  39.624  17.225  1.00  0.00           H
ATOM    998  HZ1 LYS A 757     -10.751  41.990  17.271  1.00  0.00           H
ATOM    999  HZ2 LYS A 757     -10.375  41.521  15.736  1.00  0.00           H
ATOM   1000  HZ3 LYS A 757     -11.928  41.930  16.116  1.00  0.00           H
ATOM   1001  N   GLU A 758     -13.307  35.176  17.411  1.00 69.82           N
ATOM   1002  CA  GLU A 758     -13.223  34.973  18.857  1.00 70.20           C
ATOM   1003  C   GLU A 758     -12.440  33.720  19.230  1.00 69.93           C
ATOM   1004  O   GLU A 758     -11.954  33.599  20.356  1.00 71.33           O
ATOM   1005  CB  GLU A 758     -14.609  35.030  19.549  1.00 70.93           C
ATOM   1006  CG  GLU A 758     -15.603  33.935  19.208  1.00 73.17           C
ATOM   1007  CD  GLU A 758     -16.959  34.014  19.902  1.00 -1.00           C
ATOM   1008  OE1 GLU A 758     -17.869  34.658  19.334  1.00 -1.00           O
ATOM   1009  OE2 GLU A 758     -17.063  33.420  20.996  1.00 -1.00           O1-
ATOM   1010  H   GLU A 758     -14.211  35.134  16.956  1.00  0.00           H
ATOM   1011  HA  GLU A 758     -12.659  35.814  19.261  1.00  0.00           H
ATOM   1012  HB2 GLU A 758     -14.442  35.002  20.627  1.00  0.00           H
ATOM   1013  HB3 GLU A 758     -15.069  36.000  19.358  1.00  0.00           H
ATOM   1014  HG2 GLU A 758     -15.812  33.954  18.138  1.00  0.00           H
ATOM   1015  HG3 GLU A 758     -15.184  32.966  19.479  1.00  0.00           H
ATOM   1016  N   ILE A 759     -12.305  32.786  18.282  1.00 68.73           N
ATOM   1017  CA  ILE A 759     -11.584  31.562  18.578  1.00 66.73           C
ATOM   1018  C   ILE A 759     -10.120  31.907  18.621  1.00 65.38           C
ATOM   1019  O   ILE A 759      -9.363  31.369  19.425  1.00 65.59           O
ATOM   1020  CB  ILE A 759     -11.803  30.444  17.539  1.00 66.74           C
ATOM   1021  CG1 ILE A 759     -13.279  30.307  17.125  1.00 66.72           C
ATOM   1022  CG2 ILE A 759     -11.303  29.123  18.093  1.00 66.11           C
ATOM   1023  CD1 ILE A 759     -14.234  29.944  18.248  1.00 66.65           C
ATOM   1024  H   ILE A 759     -12.711  32.917  17.366  1.00  0.00           H
ATOM   1025  HA  ILE A 759     -11.891  31.193  19.560  1.00  0.00           H
ATOM   1026  HB  ILE A 759     -11.241  30.666  16.629  1.00  0.00           H
ATOM   1027 HG12 ILE A 759     -13.541  31.231  16.671  1.00  0.00           H
ATOM   1028 HG13 ILE A 759     -13.366  29.560  16.335  1.00  0.00           H
ATOM   1029 HG21 ILE A 759     -11.525  28.316  17.395  1.00  0.00           H
ATOM   1030 HG22 ILE A 759     -10.222  29.120  18.228  1.00  0.00           H
ATOM   1031 HG23 ILE A 759     -11.751  28.874  19.056  1.00  0.00           H
ATOM   1032 HD11 ILE A 759     -15.258  29.907  17.877  1.00  0.00           H
ATOM   1033 HD12 ILE A 759     -14.008  28.970  18.671  1.00  0.00           H
ATOM   1034 HD13 ILE A 759     -14.209  30.676  19.055  1.00  0.00           H
ATOM   1035  N   LEU A 760      -9.723  32.827  17.759  1.00 64.19           N
ATOM   1036  CA  LEU A 760      -8.348  33.281  17.753  1.00 64.29           C
ATOM   1037  C   LEU A 760      -8.000  34.142  18.951  1.00 64.41           C
ATOM   1038  O   LEU A 760      -6.816  34.269  19.315  1.00 65.28           O
ATOM   1039  CB  LEU A 760      -8.052  34.041  16.486  1.00 63.76           C
ATOM   1040  CG  LEU A 760      -7.984  33.126  15.267  1.00 63.62           C
ATOM   1041  CD1 LEU A 760      -7.792  33.964  14.026  1.00 64.48           C
ATOM   1042  CD2 LEU A 760      -6.850  32.132  15.405  1.00 63.15           C
ATOM   1043  H   LEU A 760     -10.388  33.257  17.130  1.00  0.00           H
ATOM   1044  HA  LEU A 760      -7.684  32.423  17.841  1.00  0.00           H
ATOM   1045  HB2 LEU A 760      -8.800  34.818  16.328  1.00  0.00           H
ATOM   1046  HB3 LEU A 760      -7.100  34.569  16.573  1.00  0.00           H
ATOM   1047  HG  LEU A 760      -8.923  32.580  15.159  1.00  0.00           H
ATOM   1048 HD11 LEU A 760      -7.766  33.343  13.130  1.00  0.00           H
ATOM   1049 HD12 LEU A 760      -8.610  34.675  13.901  1.00  0.00           H
ATOM   1050 HD13 LEU A 760      -6.861  34.531  14.064  1.00  0.00           H
ATOM   1051 HD21 LEU A 760      -6.660  31.628  14.457  1.00  0.00           H
ATOM   1052 HD22 LEU A 760      -5.919  32.614  15.706  1.00  0.00           H
ATOM   1053 HD23 LEU A 760      -7.072  31.339  16.118  1.00  0.00           H
ATOM   1054  N   ASP A 761      -9.034  34.748  19.547  1.00 63.96           N
ATOM   1055  CA  ASP A 761      -8.855  35.546  20.744  1.00 63.34           C
ATOM   1056  C   ASP A 761      -8.574  34.662  21.921  1.00 62.64           C
ATOM   1057  O   ASP A 761      -7.637  34.893  22.682  1.00 62.58           O
ATOM   1058  CB  ASP A 761     -10.077  36.406  21.005  1.00 64.99           C
ATOM   1059  CG  ASP A 761     -10.280  37.436  19.931  1.00 66.72           C
ATOM   1060  OD1 ASP A 761      -9.359  37.634  19.099  1.00 67.10           O
ATOM   1061  OD2 ASP A 761     -11.365  38.042  19.912  1.00 68.02           O1-
ATOM   1062  H   ASP A 761      -9.964  34.637  19.169  1.00  0.00           H
ATOM   1063  HA  ASP A 761      -7.989  36.198  20.619  1.00  0.00           H
ATOM   1064  HB2 ASP A 761     -10.981  35.808  21.103  1.00  0.00           H
ATOM   1065  HB3 ASP A 761      -9.962  36.942  21.948  1.00  0.00           H
ATOM   1066  N   GLU A 762      -9.383  33.631  22.067  1.00 62.68           N
ATOM   1067  CA  GLU A 762      -9.147  32.691  23.128  1.00 62.63           C
ATOM   1068  C   GLU A 762      -7.694  32.222  23.076  1.00 61.95           C
ATOM   1069  O   GLU A 762      -6.954  32.326  24.055  1.00 61.95           O
ATOM   1070  CB  GLU A 762     -10.095  31.515  22.967  1.00 62.80           C
ATOM   1071  CG  GLU A 762      -9.812  30.338  23.883  1.00 65.39           C
ATOM   1072  CD  GLU A 762     -11.024  29.417  24.043  1.00 67.98           C
ATOM   1073  OE1 GLU A 762     -10.884  28.331  24.661  1.00 68.45           O
ATOM   1074  OE2 GLU A 762     -12.125  29.771  23.562  1.00 68.17           O1-
ATOM   1075  H   GLU A 762     -10.152  33.481  21.427  1.00  0.00           H
ATOM   1076  HA  GLU A 762      -9.332  33.175  24.089  1.00  0.00           H
ATOM   1077  HB2 GLU A 762     -11.095  31.916  23.142  1.00  0.00           H
ATOM   1078  HB3 GLU A 762     -10.097  31.159  21.936  1.00  0.00           H
ATOM   1079  HG2 GLU A 762      -8.969  29.750  23.518  1.00  0.00           H
ATOM   1080  HG3 GLU A 762      -9.552  30.699  24.878  1.00  0.00           H
ATOM   1081  N   ALA A 763      -7.268  31.752  21.940  1.00 60.98           N
ATOM   1082  CA  ALA A 763      -5.947  31.247  21.866  1.00 60.11           C
ATOM   1083  C   ALA A 763      -5.015  32.357  22.171  1.00 60.08           C
ATOM   1084  O   ALA A 763      -3.986  32.164  22.763  1.00 59.65           O
ATOM   1085  CB  ALA A 763      -5.699  30.723  20.543  1.00 60.13           C
ATOM   1086  H   ALA A 763      -7.882  31.689  21.139  1.00  0.00           H
ATOM   1087  HA  ALA A 763      -5.834  30.451  22.602  1.00  0.00           H
ATOM   1088  HB1 ALA A 763      -4.678  30.354  20.439  1.00  0.00           H
ATOM   1089  HB2 ALA A 763      -6.364  29.887  20.324  1.00  0.00           H
ATOM   1090  HB3 ALA A 763      -5.857  31.472  19.764  1.00  0.00           H
ATOM   1091  N   TYR A 764      -5.336  33.543  21.734  1.00 60.79           N
ATOM   1092  CA  TYR A 764      -4.397  34.587  21.984  1.00 61.56           C
ATOM   1093  C   TYR A 764      -4.196  34.809  23.449  1.00 60.85           C
ATOM   1094  O   TYR A 764      -3.103  34.956  23.893  1.00 61.55           O
ATOM   1095  CB  TYR A 764      -4.866  35.874  21.354  1.00 62.86           C
ATOM   1096  CG  TYR A 764      -4.152  37.064  21.893  1.00 64.55           C
ATOM   1097  CD1 TYR A 764      -2.955  37.461  21.373  1.00 67.07           C
ATOM   1098  CD2 TYR A 764      -4.682  37.796  22.922  1.00 65.34           C
ATOM   1099  CE1 TYR A 764      -2.315  38.537  21.867  1.00 69.17           C
ATOM   1100  CE2 TYR A 764      -4.046  38.870  23.420  1.00 68.77           C
ATOM   1101  CZ  TYR A 764      -2.862  39.238  22.902  1.00 70.90           C
ATOM   1102  OH  TYR A 764      -2.236  40.339  23.423  1.00 73.21           O
ATOM   1103  H   TYR A 764      -6.185  33.720  21.214  1.00  0.00           H
ATOM   1104  HA  TYR A 764      -3.432  34.335  21.536  1.00  0.00           H
ATOM   1105  HB2 TYR A 764      -4.719  35.828  20.274  1.00  0.00           H
ATOM   1106  HB3 TYR A 764      -5.927  36.045  21.489  1.00  0.00           H
ATOM   1107  HD1 TYR A 764      -2.511  36.907  20.559  1.00  0.00           H
ATOM   1108  HD2 TYR A 764      -5.638  37.516  23.337  1.00  0.00           H
ATOM   1109  HE1 TYR A 764      -1.367  38.836  21.445  1.00  0.00           H
ATOM   1110  HE2 TYR A 764      -4.488  39.430  24.232  1.00  0.00           H
ATOM   1111  HH  TYR A 764      -1.478  40.601  22.922  1.00  0.00           H
ATOM   1112  N   VAL A 765      -5.236  34.861  24.236  1.00 59.36           N
ATOM   1113  CA  VAL A 765      -4.968  35.126  25.616  1.00 57.93           C
ATOM   1114  C   VAL A 765      -4.242  33.990  26.238  1.00 58.02           C
ATOM   1115  O   VAL A 765      -3.298  34.173  26.947  1.00 58.58           O
ATOM   1116  CB  VAL A 765      -6.213  35.311  26.364  1.00 57.89           C
ATOM   1117  CG1 VAL A 765      -7.068  36.271  25.656  1.00 57.63           C
ATOM   1118  CG2 VAL A 765      -6.871  34.024  26.483  1.00 56.85           C
ATOM   1119  H   VAL A 765      -6.181  34.745  23.892  1.00  0.00           H
ATOM   1120  HA  VAL A 765      -4.394  36.051  25.716  1.00  0.00           H
ATOM   1121  HB  VAL A 765      -5.984  35.700  27.359  1.00  0.00           H
ATOM   1122 HG11 VAL A 765      -7.872  36.597  26.317  1.00  0.00           H
ATOM   1123 HG12 VAL A 765      -6.526  37.176  25.381  1.00  0.00           H
ATOM   1124 HG13 VAL A 765      -7.565  35.882  24.780  1.00  0.00           H
ATOM   1125 HG21 VAL A 765      -7.740  34.297  27.084  1.00  0.00           H
ATOM   1126 HG22 VAL A 765      -7.442  33.716  25.635  1.00  0.00           H
ATOM   1127 HG23 VAL A 765      -6.557  33.254  27.189  1.00  0.00           H
ATOM   1128  N   MET A 766      -4.687  32.797  25.929  1.00 57.67           N
ATOM   1129  CA  MET A 766      -4.193  31.588  26.542  1.00 57.76           C
ATOM   1130  C   MET A 766      -2.729  31.280  26.306  1.00 57.10           C
ATOM   1131  O   MET A 766      -2.089  30.674  27.119  1.00 56.66           O
ATOM   1132  CB  MET A 766      -5.053  30.422  26.117  1.00 59.45           C
ATOM   1133  CG  MET A 766      -4.715  29.154  26.804  1.00 63.84           C
ATOM   1134  SD  MET A 766      -6.123  28.095  26.904  1.00 69.24           S
ATOM   1135  CE  MET A 766      -7.029  28.769  25.552  1.00 68.11           C
ATOM   1136  H   MET A 766      -5.470  32.721  25.291  1.00  0.00           H
ATOM   1137  HA  MET A 766      -4.316  31.711  27.621  1.00  0.00           H
ATOM   1138  HB2 MET A 766      -6.024  30.790  26.442  1.00  0.00           H
ATOM   1139  HB3 MET A 766      -5.027  30.337  25.030  1.00  0.00           H
ATOM   1140  HG2 MET A 766      -3.889  28.639  26.446  1.00  0.00           H
ATOM   1141  HG3 MET A 766      -4.464  29.364  27.845  1.00  0.00           H
ATOM   1142  HE1 MET A 766      -7.822  28.052  25.337  1.00  0.00           H
ATOM   1143  HE2 MET A 766      -7.569  29.689  25.767  1.00  0.00           H
ATOM   1144  HE3 MET A 766      -6.460  28.829  24.624  1.00  0.00           H
ATOM   1145  N   ALA A 767      -2.236  31.580  25.130  1.00 56.84           N
ATOM   1146  CA  ALA A 767      -0.842  31.423  24.813  1.00 56.32           C
ATOM   1147  C   ALA A 767      -0.022  32.461  25.513  1.00 56.63           C
ATOM   1148  O   ALA A 767       1.147  32.295  25.744  1.00 56.40           O
ATOM   1149  CB  ALA A 767      -0.663  31.533  23.386  1.00 56.60           C
ATOM   1150  H   ALA A 767      -2.839  32.006  24.437  1.00  0.00           H
ATOM   1151  HA  ALA A 767      -0.497  30.435  25.126  1.00  0.00           H
ATOM   1152  HB1 ALA A 767       0.382  31.404  23.098  1.00  0.00           H
ATOM   1153  HB2 ALA A 767      -1.231  30.765  22.861  1.00  0.00           H
ATOM   1154  HB3 ALA A 767      -0.995  32.499  23.001  1.00  0.00           H
ATOM   1155  N   SER A 768      -0.645  33.588  25.764  1.00 56.74           N
ATOM   1156  CA  SER A 768       0.028  34.726  26.313  1.00 56.82           C
ATOM   1157  C   SER A 768       0.010  34.741  27.796  1.00 56.71           C
ATOM   1158  O   SER A 768       0.609  35.594  28.402  1.00 57.14           O
ATOM   1159  CB  SER A 768      -0.656  35.977  25.826  1.00 56.95           C
ATOM   1160  OG  SER A 768      -1.916  36.084  26.431  1.00 60.07           O
ATOM   1161  H   SER A 768      -1.622  33.677  25.520  1.00  0.00           H
ATOM   1162  HA  SER A 768       1.051  34.763  26.020  1.00  0.00           H
ATOM   1163  HB2 SER A 768      -0.094  36.846  26.149  1.00  0.00           H
ATOM   1164  HB3 SER A 768      -0.739  36.004  24.739  1.00  0.00           H
ATOM   1165  HG  SER A 768      -2.384  35.260  26.356  1.00  0.00           H
ATOM   1166  N   VAL A 769      -0.683  33.806  28.406  1.00 56.29           N
ATOM   1167  CA  VAL A 769      -0.760  33.834  29.841  1.00 55.68           C
ATOM   1168  C   VAL A 769       0.038  32.766  30.461  1.00 56.15           C
ATOM   1169  O   VAL A 769      -0.204  31.607  30.261  1.00 56.35           O
ATOM   1170  CB  VAL A 769      -2.148  33.642  30.332  1.00 55.24           C
ATOM   1171  CG1 VAL A 769      -3.106  34.312  29.430  1.00 53.96           C
ATOM   1172  CG2 VAL A 769      -2.411  32.221  30.444  1.00 54.00           C
ATOM   1173  H   VAL A 769      -1.191  33.103  27.888  1.00  0.00           H
ATOM   1174  HA  VAL A 769      -0.471  34.797  30.271  1.00  0.00           H
ATOM   1175  HB  VAL A 769      -2.256  34.075  31.324  1.00  0.00           H
ATOM   1176 HG11 VAL A 769      -3.803  34.830  30.091  1.00  0.00           H
ATOM   1177 HG12 VAL A 769      -2.725  35.171  28.878  1.00  0.00           H
ATOM   1178 HG13 VAL A 769      -3.806  33.608  28.987  1.00  0.00           H
ATOM   1179 HG21 VAL A 769      -3.488  32.152  30.603  1.00  0.00           H
ATOM   1180 HG22 VAL A 769      -2.342  31.625  29.529  1.00  0.00           H
ATOM   1181 HG23 VAL A 769      -2.143  31.723  31.384  1.00  0.00           H
ATOM   1182  N   ASP A 770       0.974  33.201  31.278  1.00 57.14           N
ATOM   1183  CA  ASP A 770       1.837  32.318  32.001  1.00 58.60           C
ATOM   1184  C   ASP A 770       1.707  32.564  33.486  1.00 57.55           C
ATOM   1185  O   ASP A 770       2.003  33.625  33.960  1.00 58.74           O
ATOM   1186  CB  ASP A 770       3.247  32.607  31.547  1.00 60.91           C
ATOM   1187  CG  ASP A 770       4.270  31.951  32.380  1.00 64.43           C
ATOM   1188  OD1 ASP A 770       3.920  31.084  33.175  1.00 64.55           O
ATOM   1189  OD2 ASP A 770       5.442  32.309  32.235  1.00 66.35           O1-
ATOM   1190  H   ASP A 770       1.085  34.194  31.430  1.00  0.00           H
ATOM   1191  HA  ASP A 770       1.624  31.264  31.804  1.00  0.00           H
ATOM   1192  HB2 ASP A 770       3.380  32.279  30.516  1.00  0.00           H
ATOM   1193  HB3 ASP A 770       3.444  33.681  31.559  1.00  0.00           H
ATOM   1194  N   ASN A 771       1.269  31.557  34.214  1.00 55.95           N
ATOM   1195  CA  ASN A 771       1.185  31.603  35.639  1.00 54.62           C
ATOM   1196  C   ASN A 771       1.007  30.176  35.988  1.00 53.98           C
ATOM   1197  O   ASN A 771       0.479  29.429  35.215  1.00 54.17           O
ATOM   1198  CB  ASN A 771      -0.019  32.401  36.060  1.00 54.42           C
ATOM   1199  CG  ASN A 771      -0.226  32.393  37.512  1.00 53.93           C
ATOM   1200  OD1 ASN A 771      -0.915  31.409  37.999  1.00 55.57           O
ATOM   1201  ND2 ASN A 771       0.207  33.273  38.192  1.00 52.01           N
ATOM   1202  H   ASN A 771       1.048  30.677  33.768  1.00  0.00           H
ATOM   1203  HA  ASN A 771       2.111  32.041  36.007  1.00  0.00           H
ATOM   1204  HB2 ASN A 771       0.093  33.432  35.732  1.00  0.00           H
ATOM   1205  HB3 ASN A 771      -0.925  32.030  35.575  1.00  0.00           H
ATOM   1206 HD21 ASN A 771       0.722  34.032  37.769  1.00  0.00           H
ATOM   1207 HD22 ASN A 771       0.036  33.266  39.187  1.00  0.00           H
ATOM   1208  N   PRO A 772       1.418  29.796  37.166  1.00 53.24           N
ATOM   1209  CA  PRO A 772       1.351  28.417  37.591  1.00 53.07           C
ATOM   1210  C   PRO A 772      -0.049  27.935  37.687  1.00 53.35           C
ATOM   1211  O   PRO A 772      -0.300  26.769  37.623  1.00 53.46           O
ATOM   1212  CB  PRO A 772       1.925  28.483  38.971  1.00 52.86           C
ATOM   1213  CG  PRO A 772       2.744  29.631  38.973  1.00 53.19           C
ATOM   1214  CD  PRO A 772       2.134  30.618  38.132  1.00 52.69           C
ATOM   1215  HA  PRO A 772       1.952  27.784  36.935  1.00  0.00           H
ATOM   1216  HB2 PRO A 772       1.167  28.601  39.744  1.00  0.00           H
ATOM   1217  HB3 PRO A 772       2.485  27.581  39.220  1.00  0.00           H
ATOM   1218  HG2 PRO A 772       2.936  30.002  39.981  1.00  0.00           H
ATOM   1219  HG3 PRO A 772       3.717  29.364  38.554  1.00  0.00           H
ATOM   1220  HD2 PRO A 772       1.499  31.162  38.819  1.00  0.00           H
ATOM   1221  HD3 PRO A 772       2.907  31.276  37.738  1.00  0.00           H
ATOM   1222  N   HIS A 773      -0.954  28.853  37.902  1.00 53.63           N
ATOM   1223  CA  HIS A 773      -2.294  28.496  38.239  1.00 54.19           C
ATOM   1224  C   HIS A 773      -3.334  28.789  37.214  1.00 55.34           C
ATOM   1225  O   HIS A 773      -4.495  28.828  37.516  1.00 54.90           O
ATOM   1226  CB  HIS A 773      -2.641  29.073  39.578  1.00 53.86           C
ATOM   1227  CG  HIS A 773      -1.806  28.519  40.680  1.00 53.47           C
ATOM   1228  ND1 HIS A 773      -1.940  27.231  41.130  1.00 53.58           N
ATOM   1229  CD2 HIS A 773      -0.808  29.064  41.398  1.00 52.32           C
ATOM   1230  CE1 HIS A 773      -1.068  27.008  42.089  1.00 53.17           C
ATOM   1231  NE2 HIS A 773      -0.367  28.105  42.267  1.00 53.07           N
ATOM   1232  H   HIS A 773      -0.700  29.835  37.945  1.00  0.00           H
ATOM   1233  HA  HIS A 773      -2.408  27.431  38.404  1.00  0.00           H
ATOM   1234  HB2 HIS A 773      -2.538  30.158  39.574  1.00  0.00           H
ATOM   1235  HB3 HIS A 773      -3.678  28.873  39.855  1.00  0.00           H
ATOM   1236  HD1 HIS A 773      -2.570  26.539  40.740  1.00  0.00           H
ATOM   1237  HD2 HIS A 773      -0.374  30.052  41.356  1.00  0.00           H
ATOM   1238  HE1 HIS A 773      -0.864  26.051  42.535  1.00  0.00           H
ATOM   1239  N   VAL A 774      -2.895  29.009  35.993  1.00 56.35           N
ATOM   1240  CA  VAL A 774      -3.788  29.174  34.879  1.00 56.55           C
ATOM   1241  C   VAL A 774      -3.292  28.315  33.767  1.00 57.32           C
ATOM   1242  O   VAL A 774      -2.122  28.177  33.588  1.00 58.23           O
ATOM   1243  CB  VAL A 774      -3.797  30.567  34.369  1.00 56.12           C
ATOM   1244  CG1 VAL A 774      -4.724  30.648  33.254  1.00 55.75           C
ATOM   1245  CG2 VAL A 774      -4.224  31.485  35.418  1.00 56.34           C
ATOM   1246  H   VAL A 774      -1.902  28.973  35.804  1.00  0.00           H
ATOM   1247  HA  VAL A 774      -4.802  28.850  35.126  1.00  0.00           H
ATOM   1248  HB  VAL A 774      -2.803  30.875  34.036  1.00  0.00           H
ATOM   1249 HG11 VAL A 774      -4.921  31.697  33.031  1.00  0.00           H
ATOM   1250 HG12 VAL A 774      -4.335  30.253  32.318  1.00  0.00           H
ATOM   1251 HG13 VAL A 774      -5.665  30.150  33.492  1.00  0.00           H
ATOM   1252 HG21 VAL A 774      -4.302  32.509  35.050  1.00  0.00           H
ATOM   1253 HG22 VAL A 774      -5.196  31.212  35.827  1.00  0.00           H
ATOM   1254 HG23 VAL A 774      -3.515  31.529  36.245  1.00  0.00           H
ATOM   1255  N   CYS A 775      -4.188  27.737  33.005  1.00 57.60           N
ATOM   1256  CA  CYS A 775      -3.786  26.871  31.926  1.00 59.02           C
ATOM   1257  C   CYS A 775      -3.162  27.585  30.778  1.00 59.33           C
ATOM   1258  O   CYS A 775      -3.477  28.710  30.488  1.00 59.59           O
ATOM   1259  CB  CYS A 775      -4.970  26.095  31.425  1.00 59.34           C
ATOM   1260  SG  CYS A 775      -5.568  25.005  32.725  1.00 65.75           S
ATOM   1261  H   CYS A 775      -5.174  27.876  33.181  1.00  0.00           H
ATOM   1262  HA  CYS A 775      -3.061  26.150  32.314  1.00  0.00           H
ATOM   1263  HB2 CYS A 775      -5.781  26.756  31.112  1.00  0.00           H
ATOM   1264  HB3 CYS A 775      -4.711  25.474  30.566  1.00  0.00           H
ATOM   1265  HG  CYS A 775      -5.941  25.980  33.562  1.00  0.00           H
ATOM   1266  N   ARG A 776      -2.279  26.885  30.099  1.00 60.09           N
ATOM   1267  CA  ARG A 776      -1.598  27.452  28.980  1.00 59.37           C
ATOM   1268  C   ARG A 776      -1.876  26.668  27.753  1.00 56.00           C
ATOM   1269  O   ARG A 776      -1.990  25.480  27.805  1.00 56.20           O
ATOM   1270  CB  ARG A 776      -0.117  27.468  29.232  1.00 63.07           C
ATOM   1271  CG  ARG A 776       0.547  28.537  28.459  1.00 68.16           C
ATOM   1272  CD  ARG A 776       1.835  28.919  29.071  1.00 75.19           C
ATOM   1273  NE  ARG A 776       2.379  30.093  28.414  1.00 79.80           N
ATOM   1274  CZ  ARG A 776       3.664  30.411  28.400  1.00 82.31           C
ATOM   1275  NH1 ARG A 776       4.077  31.506  27.771  1.00 83.26           N
ATOM   1276  NH2 ARG A 776       4.532  29.631  29.010  1.00 83.19           N1+
ATOM   1277  H   ARG A 776      -2.074  25.931  30.356  1.00  0.00           H
ATOM   1278  HA  ARG A 776      -1.931  28.473  28.784  1.00  0.00           H
ATOM   1279  HB2 ARG A 776       0.036  27.667  30.295  1.00  0.00           H
ATOM   1280  HB3 ARG A 776       0.354  26.499  29.049  1.00  0.00           H
ATOM   1281  HG2 ARG A 776       0.695  28.222  27.426  1.00  0.00           H
ATOM   1282  HG3 ARG A 776      -0.071  29.435  28.420  1.00  0.00           H
ATOM   1283  HD2 ARG A 776       1.719  29.161  30.129  1.00  0.00           H
ATOM   1284  HD3 ARG A 776       2.521  28.074  29.000  1.00  0.00           H
ATOM   1285  HE  ARG A 776       1.711  30.722  27.989  1.00  0.00           H
ATOM   1286 HH11 ARG A 776       3.411  32.094  27.288  1.00  0.00           H
ATOM   1287 HH12 ARG A 776       5.052  31.770  27.785  1.00  0.00           H
ATOM   1288 HH21 ARG A 776       4.212  28.814  29.509  1.00  0.00           H
ATOM   1289 HH22 ARG A 776       5.513  29.870  29.032  1.00  0.00           H
ATOM   1290  N   LEU A 777      -2.030  27.361  26.648  1.00 51.57           N
ATOM   1291  CA  LEU A 777      -2.196  26.730  25.376  1.00 48.25           C
ATOM   1292  C   LEU A 777      -0.860  26.203  25.012  1.00 47.22           C
ATOM   1293  O   LEU A 777       0.111  26.905  25.106  1.00 47.43           O
ATOM   1294  CB  LEU A 777      -2.584  27.759  24.341  1.00 47.33           C
ATOM   1295  CG  LEU A 777      -3.163  27.264  23.053  1.00 44.71           C
ATOM   1296  CD1 LEU A 777      -4.361  26.501  23.334  1.00 44.86           C
ATOM   1297  CD2 LEU A 777      -3.512  28.416  22.285  1.00 43.17           C
ATOM   1298  H   LEU A 777      -1.938  28.367  26.675  1.00  0.00           H
ATOM   1299  HA  LEU A 777      -2.906  25.911  25.470  1.00  0.00           H
ATOM   1300  HB2 LEU A 777      -3.278  28.502  24.678  1.00  0.00           H
ATOM   1301  HB3 LEU A 777      -1.716  28.380  24.106  1.00  0.00           H
ATOM   1302  HG  LEU A 777      -2.436  26.654  22.516  1.00  0.00           H
ATOM   1303 HD11 LEU A 777      -4.308  25.525  22.853  1.00  0.00           H
ATOM   1304 HD12 LEU A 777      -4.588  26.329  24.383  1.00  0.00           H
ATOM   1305 HD13 LEU A 777      -5.254  27.022  22.991  1.00  0.00           H
ATOM   1306 HD21 LEU A 777      -3.976  28.130  21.339  1.00  0.00           H
ATOM   1307 HD22 LEU A 777      -4.202  29.079  22.803  1.00  0.00           H
ATOM   1308 HD23 LEU A 777      -2.631  29.003  22.026  1.00  0.00           H
ATOM   1309  N   LEU A 778      -0.806  24.972  24.566  1.00 45.26           N
ATOM   1310  CA  LEU A 778       0.455  24.398  24.125  1.00 44.26           C
ATOM   1311  C   LEU A 778       0.680  24.785  22.706  1.00 43.79           C
ATOM   1312  O   LEU A 778       1.764  25.185  22.327  1.00 42.94           O
ATOM   1313  CB  LEU A 778       0.419  22.888  24.243  1.00 44.12           C
ATOM   1314  CG  LEU A 778       1.026  22.227  25.485  1.00 43.82           C
ATOM   1315  CD1 LEU A 778       1.008  23.062  26.778  1.00 44.69           C
ATOM   1316  CD2 LEU A 778       0.319  20.944  25.693  1.00 41.70           C
ATOM   1317  H   LEU A 778      -1.649  24.418  24.464  1.00  0.00           H
ATOM   1318  HA  LEU A 778       1.305  24.781  24.692  1.00  0.00           H
ATOM   1319  HB2 LEU A 778      -0.550  22.484  24.039  1.00  0.00           H
ATOM   1320  HB3 LEU A 778       0.997  22.457  23.422  1.00  0.00           H
ATOM   1321  HG  LEU A 778       2.076  22.011  25.283  1.00  0.00           H
ATOM   1322 HD11 LEU A 778       1.391  22.488  27.623  1.00  0.00           H
ATOM   1323 HD12 LEU A 778       1.630  23.953  26.702  1.00  0.00           H
ATOM   1324 HD13 LEU A 778      -0.005  23.381  27.027  1.00  0.00           H
ATOM   1325 HD21 LEU A 778       0.530  20.512  26.670  1.00  0.00           H
ATOM   1326 HD22 LEU A 778      -0.744  21.013  25.542  1.00  0.00           H
ATOM   1327 HD23 LEU A 778       0.678  20.227  24.956  1.00  0.00           H
ATOM   1328  N   GLY A 779      -0.377  24.690  21.917  1.00 43.80           N
ATOM   1329  CA  GLY A 779      -0.301  25.056  20.503  1.00 43.93           C
ATOM   1330  C   GLY A 779      -1.681  25.057  19.905  1.00 43.53           C
ATOM   1331  O   GLY A 779      -2.608  24.540  20.513  1.00 44.76           O
ATOM   1332  H   GLY A 779      -1.260  24.360  22.284  1.00  0.00           H
ATOM   1333  HA2 GLY A 779       0.133  26.052  20.398  1.00  0.00           H
ATOM   1334  HA3 GLY A 779       0.330  24.350  19.961  1.00  0.00           H
ATOM   1335  N   ILE A 780      -1.827  25.626  18.719  1.00 42.89           N
ATOM   1336  CA  ILE A 780      -3.112  25.629  18.020  1.00 42.42           C
ATOM   1337  C   ILE A 780      -2.906  24.934  16.702  1.00 41.62           C
ATOM   1338  O   ILE A 780      -1.790  24.839  16.234  1.00 40.64           O
ATOM   1339  CB  ILE A 780      -3.640  27.050  17.752  1.00 43.04           C
ATOM   1340  CG1 ILE A 780      -5.050  26.977  17.179  1.00 44.34           C
ATOM   1341  CG2 ILE A 780      -2.759  27.787  16.739  1.00 43.72           C
ATOM   1342  CD1 ILE A 780      -5.621  28.320  16.729  1.00 42.60           C
ATOM   1343  H   ILE A 780      -1.024  26.026  18.250  1.00  0.00           H
ATOM   1344  HA  ILE A 780      -3.873  25.077  18.571  1.00  0.00           H
ATOM   1345  HB  ILE A 780      -3.657  27.606  18.691  1.00  0.00           H
ATOM   1346 HG12 ILE A 780      -5.146  26.401  16.270  1.00  0.00           H
ATOM   1347 HG13 ILE A 780      -5.709  26.517  17.907  1.00  0.00           H
ATOM   1348 HG21 ILE A 780      -2.969  28.857  16.745  1.00  0.00           H
ATOM   1349 HG22 ILE A 780      -1.700  27.696  16.984  1.00  0.00           H
ATOM   1350 HG23 ILE A 780      -2.894  27.443  15.712  1.00  0.00           H
ATOM   1351 HD11 ILE A 780      -6.680  28.244  16.505  1.00  0.00           H
ATOM   1352 HD12 ILE A 780      -5.528  29.059  17.525  1.00  0.00           H
ATOM   1353 HD13 ILE A 780      -5.117  28.719  15.853  1.00  0.00           H
ATOM   1354  N   CYS A 781      -3.975  24.388  16.151  1.00 41.56           N
ATOM   1355  CA  CYS A 781      -3.962  23.761  14.847  1.00 42.85           C
ATOM   1356  C   CYS A 781      -5.065  24.320  13.998  1.00 44.66           C
ATOM   1357  O   CYS A 781      -6.203  24.232  14.347  1.00 46.55           O
ATOM   1358  CB  CYS A 781      -4.203  22.289  15.003  1.00 41.99           C
ATOM   1359  SG  CYS A 781      -3.751  21.314  13.556  1.00 42.51           S
ATOM   1360  H   CYS A 781      -4.861  24.441  16.638  1.00  0.00           H
ATOM   1361  HA  CYS A 781      -3.008  23.916  14.339  1.00  0.00           H
ATOM   1362  HB2 CYS A 781      -3.583  21.908  15.817  1.00  0.00           H
ATOM   1363  HB3 CYS A 781      -5.226  22.060  15.293  1.00  0.00           H
ATOM   1364  HG  CYS A 781      -2.439  21.592  13.623  1.00  0.00           H
ATOM   1365  N   LEU A 782      -4.725  24.877  12.861  1.00 45.48           N
ATOM   1366  CA  LEU A 782      -5.705  25.504  12.025  1.00 46.33           C
ATOM   1367  C   LEU A 782      -6.386  24.696  10.968  1.00 47.24           C
ATOM   1368  O   LEU A 782      -6.381  25.078   9.848  1.00 46.84           O
ATOM   1369  CB  LEU A 782      -5.053  26.671  11.338  1.00 47.38           C
ATOM   1370  CG  LEU A 782      -4.498  27.718  12.268  1.00 47.42           C
ATOM   1371  CD1 LEU A 782      -4.028  28.858  11.476  1.00 48.29           C
ATOM   1372  CD2 LEU A 782      -5.592  28.147  13.143  1.00 48.30           C
ATOM   1373  H   LEU A 782      -3.756  24.911  12.581  1.00  0.00           H
ATOM   1374  HA  LEU A 782      -6.542  25.874  12.605  1.00  0.00           H
ATOM   1375  HB2 LEU A 782      -4.246  26.320  10.690  1.00  0.00           H
ATOM   1376  HB3 LEU A 782      -5.764  27.191  10.689  1.00  0.00           H
ATOM   1377  HG  LEU A 782      -3.670  27.329  12.862  1.00  0.00           H
ATOM   1378 HD11 LEU A 782      -3.597  29.630  12.115  1.00  0.00           H
ATOM   1379 HD12 LEU A 782      -3.248  28.556  10.776  1.00  0.00           H
ATOM   1380 HD13 LEU A 782      -4.829  29.321  10.898  1.00  0.00           H
ATOM   1381 HD21 LEU A 782      -5.343  29.084  13.641  1.00  0.00           H
ATOM   1382 HD22 LEU A 782      -6.527  28.321  12.608  1.00  0.00           H
ATOM   1383 HD23 LEU A 782      -5.772  27.428  13.940  1.00  0.00           H
ATOM   1384  N   THR A 783      -7.031  23.618  11.330  1.00 48.84           N
ATOM   1385  CA  THR A 783      -7.895  22.899  10.426  1.00 50.20           C
ATOM   1386  C   THR A 783      -9.224  23.646  10.280  1.00 51.58           C
ATOM   1387  O   THR A 783      -9.546  24.529  11.083  1.00 52.05           O
ATOM   1388  CB  THR A 783      -8.103  21.509  10.944  1.00 50.36           C
ATOM   1389  OG1 THR A 783      -7.917  21.525  12.359  1.00 49.68           O
ATOM   1390  CG2 THR A 783      -7.049  20.624  10.378  1.00 51.13           C
ATOM   1391  H   THR A 783      -7.005  23.312  12.293  1.00  0.00           H
ATOM   1392  HA  THR A 783      -7.459  22.856   9.425  1.00  0.00           H
ATOM   1393  HB  THR A 783      -9.086  21.096  10.709  1.00  0.00           H
ATOM   1394  HG1 THR A 783      -8.675  21.935  12.756  1.00  0.00           H
ATOM   1395 HG21 THR A 783      -7.145  19.620  10.787  1.00  0.00           H
ATOM   1396 HG22 THR A 783      -7.134  20.539   9.294  1.00  0.00           H
ATOM   1397 HG23 THR A 783      -6.044  20.979  10.611  1.00  0.00           H
ATOM   1398  N   SER A 784     -10.076  23.224   9.379  1.00 52.67           N
ATOM   1399  CA  SER A 784     -11.257  24.000   9.138  1.00 54.06           C
ATOM   1400  C   SER A 784     -11.931  24.160  10.460  1.00 54.90           C
ATOM   1401  O   SER A 784     -12.561  25.171  10.714  1.00 55.84           O
ATOM   1402  CB  SER A 784     -12.180  23.294   8.165  1.00 54.52           C
ATOM   1403  OG  SER A 784     -12.357  21.943   8.506  1.00 56.83           O
ATOM   1404  H   SER A 784      -9.864  22.446   8.770  1.00  0.00           H
ATOM   1405  HA  SER A 784     -10.990  24.984   8.745  1.00  0.00           H
ATOM   1406  HB2 SER A 784     -13.152  23.787   8.102  1.00  0.00           H
ATOM   1407  HB3 SER A 784     -11.748  23.330   7.165  1.00  0.00           H
ATOM   1408  HG  SER A 784     -12.914  21.900   9.269  1.00  0.00           H
ATOM   1409  N   THR A 785     -11.834  23.141  11.293  1.00 54.81           N
ATOM   1410  CA  THR A 785     -12.283  23.222  12.657  1.00 54.15           C
ATOM   1411  C   THR A 785     -11.025  23.249  13.451  1.00 54.09           C
ATOM   1412  O   THR A 785     -10.334  22.275  13.534  1.00 54.14           O
ATOM   1413  CB  THR A 785     -12.966  21.971  13.051  1.00 53.65           C
ATOM   1414  OG1 THR A 785     -12.100  20.878  12.777  1.00 52.31           O
ATOM   1415  CG2 THR A 785     -14.179  21.817  12.266  1.00 53.01           C
ATOM   1416  H   THR A 785     -11.334  22.311  11.010  1.00  0.00           H
ATOM   1417  HA  THR A 785     -12.915  24.086  12.880  1.00  0.00           H
ATOM   1418  HB  THR A 785     -13.156  21.912  14.113  1.00  0.00           H
ATOM   1419  HG1 THR A 785     -11.275  21.054  13.213  1.00  0.00           H
ATOM   1420 HG21 THR A 785     -14.717  20.918  12.569  1.00  0.00           H
ATOM   1421 HG22 THR A 785     -14.857  22.657  12.420  1.00  0.00           H
ATOM   1422 HG23 THR A 785     -13.998  21.730  11.194  1.00  0.00           H
ATOM   1423  N   VAL A 786     -10.769  24.358  14.093  1.00 53.84           N
ATOM   1424  CA  VAL A 786      -9.536  24.575  14.783  1.00 52.26           C
ATOM   1425  C   VAL A 786      -9.455  23.672  15.952  1.00 50.50           C
ATOM   1426  O   VAL A 786     -10.438  23.185  16.410  1.00 51.29           O
ATOM   1427  CB  VAL A 786      -9.489  25.979  15.275  1.00 52.77           C
ATOM   1428  CG1 VAL A 786      -8.240  26.606  14.877  1.00 52.34           C
ATOM   1429  CG2 VAL A 786     -10.608  26.736  14.673  1.00 51.88           C
ATOM   1430  H   VAL A 786     -11.410  25.134  14.015  1.00  0.00           H
ATOM   1431  HA  VAL A 786      -8.726  24.355  14.084  1.00  0.00           H
ATOM   1432  HB  VAL A 786      -9.589  26.066  16.361  1.00  0.00           H
ATOM   1433 HG11 VAL A 786      -8.240  27.663  15.140  1.00  0.00           H
ATOM   1434 HG12 VAL A 786      -7.385  26.150  15.371  1.00  0.00           H
ATOM   1435 HG13 VAL A 786      -8.111  26.564  13.799  1.00  0.00           H
ATOM   1436 HG21 VAL A 786     -10.537  27.782  14.976  1.00  0.00           H
ATOM   1437 HG22 VAL A 786     -10.599  26.763  13.580  1.00  0.00           H
ATOM   1438 HG23 VAL A 786     -11.593  26.436  15.040  1.00  0.00           H
ATOM   1439  N   GLN A 787      -8.251  23.398  16.395  1.00 47.02           N
ATOM   1440  CA  GLN A 787      -8.057  22.610  17.566  1.00 43.86           C
ATOM   1441  C   GLN A 787      -7.069  23.347  18.416  1.00 42.71           C
ATOM   1442  O   GLN A 787      -6.128  23.893  17.908  1.00 42.41           O
ATOM   1443  CB  GLN A 787      -7.523  21.256  17.172  1.00 43.58           C
ATOM   1444  CG  GLN A 787      -7.908  20.829  15.796  1.00 46.12           C
ATOM   1445  CD  GLN A 787      -7.888  19.352  15.619  1.00 46.78           C
ATOM   1446  OE1 GLN A 787      -8.373  18.645  16.582  1.00 49.43           O
ATOM   1447  NE2 GLN A 787      -7.456  18.858  14.621  1.00 44.17           N
ATOM   1448  H   GLN A 787      -7.441  23.804  15.945  1.00  0.00           H
ATOM   1449  HA  GLN A 787      -8.993  22.498  18.053  1.00  0.00           H
ATOM   1450  HB2 GLN A 787      -6.433  21.220  17.230  1.00  0.00           H
ATOM   1451  HB3 GLN A 787      -7.869  20.565  17.940  1.00  0.00           H
ATOM   1452  HG2 GLN A 787      -8.950  21.067  15.591  1.00  0.00           H
ATOM   1453  HG3 GLN A 787      -7.308  21.324  15.032  1.00  0.00           H
ATOM   1454 HE21 GLN A 787      -7.115  19.448  13.874  1.00  0.00           H
ATOM   1455 HE22 GLN A 787      -7.462  17.856  14.508  1.00  0.00           H
ATOM   1456  N   LEU A 788      -7.286  23.373  19.715  1.00 40.56           N
ATOM   1457  CA  LEU A 788      -6.351  24.007  20.615  1.00 38.91           C
ATOM   1458  C   LEU A 788      -5.736  22.936  21.431  1.00 37.63           C
ATOM   1459  O   LEU A 788      -6.408  22.112  21.951  1.00 36.79           O
ATOM   1460  CB  LEU A 788      -7.040  24.965  21.545  1.00 38.81           C
ATOM   1461  CG  LEU A 788      -8.172  25.815  21.044  1.00 39.23           C
ATOM   1462  CD1 LEU A 788      -8.785  26.364  22.237  1.00 41.49           C
ATOM   1463  CD2 LEU A 788      -7.679  26.914  20.212  1.00 39.75           C
ATOM   1464  H   LEU A 788      -8.099  22.908  20.098  1.00  0.00           H
ATOM   1465  HA  LEU A 788      -5.570  24.570  20.101  1.00  0.00           H
ATOM   1466  HB2 LEU A 788      -7.422  24.396  22.397  1.00  0.00           H
ATOM   1467  HB3 LEU A 788      -6.290  25.607  21.965  1.00  0.00           H
ATOM   1468  HG  LEU A 788      -8.917  25.226  20.508  1.00  0.00           H
ATOM   1469 HD11 LEU A 788      -9.673  26.948  21.989  1.00  0.00           H
ATOM   1470 HD12 LEU A 788      -9.102  25.592  22.936  1.00  0.00           H
ATOM   1471 HD13 LEU A 788      -8.109  27.026  22.782  1.00  0.00           H
ATOM   1472 HD21 LEU A 788      -8.472  27.627  19.981  1.00  0.00           H
ATOM   1473 HD22 LEU A 788      -6.861  27.466  20.678  1.00  0.00           H
ATOM   1474 HD23 LEU A 788      -7.329  26.525  19.261  1.00  0.00           H
ATOM   1475  N   ILE A 789      -4.434  22.945  21.546  1.00 35.92           N
ATOM   1476  CA  ILE A 789      -3.800  21.892  22.264  1.00 35.27           C
ATOM   1477  C   ILE A 789      -3.329  22.356  23.586  1.00 36.93           C
ATOM   1478  O   ILE A 789      -2.591  23.300  23.712  1.00 37.62           O
ATOM   1479  CB  ILE A 789      -2.676  21.280  21.488  1.00 33.78           C
ATOM   1480  CG1 ILE A 789      -3.228  20.520  20.311  1.00 33.06           C
ATOM   1481  CG2 ILE A 789      -2.035  20.265  22.283  1.00 31.24           C
ATOM   1482  CD1 ILE A 789      -3.447  21.334  19.141  1.00 33.44           C
ATOM   1483  H   ILE A 789      -3.861  23.655  21.101  1.00  0.00           H
ATOM   1484  HA  ILE A 789      -4.467  21.050  22.470  1.00  0.00           H
ATOM   1485  HB  ILE A 789      -1.933  22.018  21.180  1.00  0.00           H
ATOM   1486 HG12 ILE A 789      -2.528  19.749  19.981  1.00  0.00           H
ATOM   1487 HG13 ILE A 789      -4.142  19.978  20.560  1.00  0.00           H
ATOM   1488 HG21 ILE A 789      -1.272  19.730  21.714  1.00  0.00           H
ATOM   1489 HG22 ILE A 789      -1.477  20.644  23.137  1.00  0.00           H
ATOM   1490 HG23 ILE A 789      -2.737  19.514  22.650  1.00  0.00           H
ATOM   1491 HD11 ILE A 789      -3.624  20.704  18.271  1.00  0.00           H
ATOM   1492 HD12 ILE A 789      -4.318  21.979  19.212  1.00  0.00           H
ATOM   1493 HD13 ILE A 789      -2.584  21.960  18.909  1.00  0.00           H
ATOM   1494  N   MET A 790      -3.739  21.667  24.621  1.00 38.60           N
ATOM   1495  CA  MET A 790      -3.441  22.087  25.949  1.00 41.15           C
ATOM   1496  C   MET A 790      -2.930  20.959  26.745  1.00 43.26           C
ATOM   1497  O   MET A 790      -3.198  19.834  26.476  1.00 42.33           O
ATOM   1498  CB  MET A 790      -4.695  22.567  26.613  1.00 43.12           C
ATOM   1499  CG  MET A 790      -5.146  23.857  26.131  1.00 44.96           C
ATOM   1500  SD  MET A 790      -6.794  24.003  26.597  1.00 47.52           S
ATOM   1501  CE  MET A 790      -7.505  22.867  25.510  1.00 43.82           C
ATOM   1502  H   MET A 790      -4.352  20.871  24.495  1.00  0.00           H
ATOM   1503  HA  MET A 790      -2.691  22.880  26.010  1.00  0.00           H
ATOM   1504  HB2 MET A 790      -5.430  21.771  26.513  1.00  0.00           H
ATOM   1505  HB3 MET A 790      -4.551  22.669  27.692  1.00  0.00           H
ATOM   1506  HG2 MET A 790      -4.566  24.662  26.582  1.00  0.00           H
ATOM   1507  HG3 MET A 790      -5.077  23.971  25.050  1.00  0.00           H
ATOM   1508  HE1 MET A 790      -8.571  23.080  25.430  1.00  0.00           H
ATOM   1509  HE2 MET A 790      -7.080  22.946  24.510  1.00  0.00           H
ATOM   1510  HE3 MET A 790      -7.420  21.837  25.852  1.00  0.00           H
ATOM   1511  N   GLN A 791      -2.192  21.289  27.769  1.00 46.52           N
ATOM   1512  CA  GLN A 791      -1.629  20.303  28.629  1.00 48.97           C
ATOM   1513  C   GLN A 791      -2.746  19.572  29.272  1.00 49.97           C
ATOM   1514  O   GLN A 791      -3.687  20.177  29.698  1.00 50.67           O
ATOM   1515  CB  GLN A 791      -0.871  21.018  29.705  1.00 48.79           C
ATOM   1516  CG  GLN A 791       0.315  20.304  30.177  1.00 54.54           C
ATOM   1517  CD  GLN A 791       0.493  20.402  31.647  1.00 57.92           C
ATOM   1518  OE1 GLN A 791       0.933  19.338  32.243  1.00 60.16           O
ATOM   1519  NE2 GLN A 791       0.243  21.421  32.240  1.00 60.72           N
ATOM   1520  H   GLN A 791      -2.014  22.263  27.967  1.00  0.00           H
ATOM   1521  HA  GLN A 791      -0.993  19.629  28.051  1.00  0.00           H
ATOM   1522  HB2 GLN A 791      -0.499  21.969  29.317  1.00  0.00           H
ATOM   1523  HB3 GLN A 791      -1.550  21.328  30.505  1.00  0.00           H
ATOM   1524  HG2 GLN A 791       0.115  19.259  29.981  1.00  0.00           H
ATOM   1525  HG3 GLN A 791       1.219  20.593  29.638  1.00  0.00           H
ATOM   1526 HE21 GLN A 791      -0.100  22.227  31.740  1.00  0.00           H
ATOM   1527 HE22 GLN A 791       0.388  21.449  33.239  1.00  0.00           H
ATOM   1528  N   LEU A 792      -2.640  18.265  29.372  1.00 50.35           N
ATOM   1529  CA  LEU A 792      -3.660  17.511  30.056  1.00 50.43           C
ATOM   1530  C   LEU A 792      -3.546  17.733  31.558  1.00 52.60           C
ATOM   1531  O   LEU A 792      -2.451  17.815  32.116  1.00 53.66           O
ATOM   1532  CB  LEU A 792      -3.541  16.033  29.740  1.00 48.57           C
ATOM   1533  CG  LEU A 792      -4.548  15.138  30.476  1.00 47.06           C
ATOM   1534  CD1 LEU A 792      -5.956  15.432  29.997  1.00 48.05           C
ATOM   1535  CD2 LEU A 792      -4.272  13.664  30.290  1.00 46.04           C
ATOM   1536  H   LEU A 792      -1.827  17.782  29.015  1.00  0.00           H
ATOM   1537  HA  LEU A 792      -4.634  17.855  29.703  1.00  0.00           H
ATOM   1538  HB2 LEU A 792      -3.652  15.873  28.672  1.00  0.00           H
ATOM   1539  HB3 LEU A 792      -2.531  15.701  29.987  1.00  0.00           H
ATOM   1540  HG  LEU A 792      -4.499  15.293  31.550  1.00  0.00           H
ATOM   1541 HD11 LEU A 792      -6.685  14.783  30.475  1.00  0.00           H
ATOM   1542 HD12 LEU A 792      -6.253  16.451  30.210  1.00  0.00           H
ATOM   1543 HD13 LEU A 792      -6.049  15.285  28.920  1.00  0.00           H
ATOM   1544 HD21 LEU A 792      -4.970  13.073  30.882  1.00  0.00           H
ATOM   1545 HD22 LEU A 792      -4.348  13.368  29.244  1.00  0.00           H
ATOM   1546 HD23 LEU A 792      -3.269  13.411  30.633  1.00  0.00           H
ATOM   1547  N   MET A 793      -4.698  17.872  32.196  1.00 53.40           N
ATOM   1548  CA  MET A 793      -4.810  17.874  33.640  1.00 53.15           C
ATOM   1549  C   MET A 793      -5.304  16.492  34.002  1.00 53.71           C
ATOM   1550  O   MET A 793      -6.505  16.230  33.902  1.00 54.13           O
ATOM   1551  CB  MET A 793      -5.825  18.906  34.095  1.00 53.01           C
ATOM   1552  CG  MET A 793      -5.391  20.342  33.869  1.00 53.58           C
ATOM   1553  SD  MET A 793      -3.599  20.523  33.955  1.00 57.27           S
ATOM   1554  CE  MET A 793      -3.408  21.818  35.154  1.00 54.22           C
ATOM   1555  H   MET A 793      -5.558  17.876  31.663  1.00  0.00           H
ATOM   1556  HA  MET A 793      -3.880  18.060  34.148  1.00  0.00           H
ATOM   1557  HB2 MET A 793      -6.804  18.757  33.640  1.00  0.00           H
ATOM   1558  HB3 MET A 793      -5.981  18.780  35.166  1.00  0.00           H
ATOM   1559  HG2 MET A 793      -5.691  20.730  32.901  1.00  0.00           H
ATOM   1560  HG3 MET A 793      -5.670  20.991  34.672  1.00  0.00           H
ATOM   1561  HE1 MET A 793      -2.359  22.078  35.186  1.00  0.00           H
ATOM   1562  HE2 MET A 793      -4.009  22.661  34.824  1.00  0.00           H
ATOM   1563  HE3 MET A 793      -3.769  21.516  36.136  1.00  0.00           H
ATOM   1564  N   PRO A 794      -4.391  15.602  34.425  1.00 53.72           N
ATOM   1565  CA  PRO A 794      -4.652  14.165  34.536  1.00 53.98           C
ATOM   1566  C   PRO A 794      -5.822  13.840  35.410  1.00 55.59           C
ATOM   1567  O   PRO A 794      -6.351  12.736  35.319  1.00 57.27           O
ATOM   1568  CB  PRO A 794      -3.375  13.626  35.197  1.00 51.84           C
ATOM   1569  CG  PRO A 794      -2.374  14.622  34.990  1.00 51.34           C
ATOM   1570  CD  PRO A 794      -3.098  15.934  35.028  1.00 52.19           C
ATOM   1571  HA  PRO A 794      -4.787  13.744  33.538  1.00  0.00           H
ATOM   1572  HB2 PRO A 794      -3.500  13.484  36.274  1.00  0.00           H
ATOM   1573  HB3 PRO A 794      -3.080  12.661  34.784  1.00  0.00           H
ATOM   1574  HG2 PRO A 794      -1.572  14.572  35.728  1.00  0.00           H
ATOM   1575  HG3 PRO A 794      -1.922  14.486  34.006  1.00  0.00           H
ATOM   1576  HD2 PRO A 794      -3.366  16.271  36.011  1.00  0.00           H
ATOM   1577  HD3 PRO A 794      -2.480  16.674  34.523  1.00  0.00           H
ATOM   1578  N   PHE A 795      -6.255  14.785  36.229  1.00 56.21           N
ATOM   1579  CA  PHE A 795      -7.252  14.447  37.209  1.00 56.45           C
ATOM   1580  C   PHE A 795      -8.639  14.957  36.958  1.00 57.74           C
ATOM   1581  O   PHE A 795      -9.556  14.605  37.701  1.00 58.73           O
ATOM   1582  CB  PHE A 795      -6.806  14.908  38.557  1.00 55.47           C
ATOM   1583  CG  PHE A 795      -5.793  14.024  39.178  1.00 55.79           C
ATOM   1584  CD1 PHE A 795      -6.186  12.823  39.783  1.00 55.62           C
ATOM   1585  CD2 PHE A 795      -4.435  14.401  39.207  1.00 55.34           C
ATOM   1586  CE1 PHE A 795      -5.241  12.004  40.400  1.00 53.77           C
ATOM   1587  CE2 PHE A 795      -3.479  13.577  39.824  1.00 54.00           C
ATOM   1588  CZ  PHE A 795      -3.881  12.383  40.418  1.00 52.14           C
ATOM   1589  H   PHE A 795      -5.807  15.690  36.267  1.00  0.00           H
ATOM   1590  HA  PHE A 795      -7.403  13.370  37.307  1.00  0.00           H
ATOM   1591  HB2 PHE A 795      -6.357  15.883  38.477  1.00  0.00           H
ATOM   1592  HB3 PHE A 795      -7.622  15.005  39.277  1.00  0.00           H
ATOM   1593  HD1 PHE A 795      -7.226  12.529  39.778  1.00  0.00           H
ATOM   1594  HD2 PHE A 795      -4.142  15.329  38.751  1.00  0.00           H
ATOM   1595  HE1 PHE A 795      -5.550  11.079  40.864  1.00  0.00           H
ATOM   1596  HE2 PHE A 795      -2.437  13.861  39.830  1.00  0.00           H
ATOM   1597  HZ  PHE A 795      -3.150  11.745  40.893  1.00  0.00           H
ATOM   1598  N   GLY A 796      -8.816  15.765  35.929  1.00 58.38           N
ATOM   1599  CA  GLY A 796     -10.121  16.326  35.679  1.00 59.13           C
ATOM   1600  C   GLY A 796     -10.319  17.597  36.449  1.00 60.37           C
ATOM   1601  O   GLY A 796      -9.389  18.132  37.046  1.00 60.49           O
ATOM   1602  H   GLY A 796      -8.040  16.014  35.329  1.00  0.00           H
ATOM   1603  HA2 GLY A 796     -10.163  16.629  34.651  1.00  0.00           H
ATOM   1604  HA3 GLY A 796     -10.937  15.619  35.842  1.00  0.00           H
ATOM   1605  N   CYS A 797     -11.548  18.075  36.499  1.00 61.13           N
ATOM   1606  CA  CYS A 797     -11.864  19.357  37.119  1.00 61.04           C
ATOM   1607  C   CYS A 797     -12.159  19.237  38.577  1.00 60.05           C
ATOM   1608  O   CYS A 797     -12.971  18.424  38.961  1.00 60.30           O
ATOM   1609  CB  CYS A 797     -13.146  19.758  36.496  1.00 62.27           C
ATOM   1610  SG  CYS A 797     -14.379  18.617  37.075  1.00 68.20           S
ATOM   1611  H   CYS A 797     -12.303  17.567  36.060  1.00  0.00           H
ATOM   1612  HA  CYS A 797     -11.099  20.072  36.886  1.00  0.00           H
ATOM   1613  HB2 CYS A 797     -13.418  20.777  36.768  1.00  0.00           H
ATOM   1614  HB3 CYS A 797     -12.975  19.708  35.422  1.00  0.00           H
ATOM   1615  N   LEU A 798     -11.535  20.076  39.385  1.00 58.53           N
ATOM   1616  CA  LEU A 798     -11.708  20.006  40.814  1.00 56.53           C
ATOM   1617  C   LEU A 798     -13.128  19.646  41.214  1.00 55.20           C
ATOM   1618  O   LEU A 798     -13.337  18.795  42.066  1.00 56.27           O
ATOM   1619  CB  LEU A 798     -11.350  21.345  41.437  1.00 56.94           C
ATOM   1620  CG  LEU A 798     -10.291  21.209  42.521  1.00 58.57           C
ATOM   1621  CD1 LEU A 798     -10.000  22.576  43.082  1.00 58.79           C
ATOM   1622  CD2 LEU A 798     -10.729  20.256  43.631  1.00 60.11           C
ATOM   1623  H   LEU A 798     -10.926  20.785  38.996  1.00  0.00           H
ATOM   1624  HA  LEU A 798     -11.038  19.213  41.140  1.00  0.00           H
ATOM   1625  HB2 LEU A 798     -10.961  22.019  40.674  1.00  0.00           H
ATOM   1626  HB3 LEU A 798     -12.222  21.865  41.841  1.00  0.00           H
ATOM   1627  HG  LEU A 798      -9.375  20.826  42.093  1.00  0.00           H
ATOM   1628 HD11 LEU A 798      -9.250  22.522  43.871  1.00  0.00           H
ATOM   1629 HD12 LEU A 798      -9.608  23.244  42.318  1.00  0.00           H
ATOM   1630 HD13 LEU A 798     -10.890  23.039  43.507  1.00  0.00           H
ATOM   1631 HD21 LEU A 798      -9.905  20.084  44.321  1.00  0.00           H
ATOM   1632 HD22 LEU A 798     -11.538  20.714  44.197  1.00  0.00           H
ATOM   1633 HD23 LEU A 798     -11.061  19.291  43.297  1.00  0.00           H
ATOM   1634  N   LEU A 799     -14.110  20.283  40.593  1.00 53.20           N
ATOM   1635  CA  LEU A 799     -15.489  19.964  40.910  1.00 52.87           C
ATOM   1636  C   LEU A 799     -15.665  18.471  41.094  1.00 52.87           C
ATOM   1637  O   LEU A 799     -16.344  18.031  42.001  1.00 52.58           O
ATOM   1638  CB  LEU A 799     -16.422  20.458  39.800  1.00 52.76           C
ATOM   1639  CG  LEU A 799     -17.935  20.175  39.868  1.00 51.38           C
ATOM   1640  CD1 LEU A 799     -18.563  20.448  41.236  1.00 49.01           C
ATOM   1641  CD2 LEU A 799     -18.615  21.044  38.817  1.00 50.66           C
ATOM   1642  H   LEU A 799     -13.907  20.977  39.887  1.00  0.00           H
ATOM   1643  HA  LEU A 799     -15.743  20.463  41.847  1.00  0.00           H
ATOM   1644  HB2 LEU A 799     -16.303  21.533  39.772  1.00  0.00           H
ATOM   1645  HB3 LEU A 799     -16.056  20.105  38.837  1.00  0.00           H
ATOM   1646  HG  LEU A 799     -18.112  19.128  39.618  1.00  0.00           H
ATOM   1647 HD11 LEU A 799     -19.649  20.390  41.190  1.00  0.00           H
ATOM   1648 HD12 LEU A 799     -18.236  19.737  41.992  1.00  0.00           H
ATOM   1649 HD13 LEU A 799     -18.310  21.447  41.591  1.00  0.00           H
ATOM   1650 HD21 LEU A 799     -19.689  20.860  38.791  1.00  0.00           H
ATOM   1651 HD22 LEU A 799     -18.469  22.106  39.018  1.00  0.00           H
ATOM   1652 HD23 LEU A 799     -18.227  20.816  37.825  1.00  0.00           H
ATOM   1653  N   ASP A 800     -15.164  17.728  40.145  1.00 54.04           N
ATOM   1654  CA  ASP A 800     -15.260  16.297  40.159  1.00 53.92           C
ATOM   1655  C   ASP A 800     -14.410  15.672  41.199  1.00 53.04           C
ATOM   1656  O   ASP A 800     -14.776  14.700  41.795  1.00 54.42           O
ATOM   1657  CB  ASP A 800     -14.940  15.743  38.801  1.00 55.05           C
ATOM   1658  CG  ASP A 800     -16.106  15.793  37.887  1.00 56.93           C
ATOM   1659  OD1 ASP A 800     -15.906  15.795  36.680  1.00 58.51           O
ATOM   1660  OD2 ASP A 800     -17.231  15.828  38.375  1.00 57.36           O1-
ATOM   1661  H   ASP A 800     -14.610  18.159  39.413  1.00  0.00           H
ATOM   1662  HA  ASP A 800     -16.267  16.017  40.477  1.00  0.00           H
ATOM   1663  HB2 ASP A 800     -14.057  16.197  38.357  1.00  0.00           H
ATOM   1664  HB3 ASP A 800     -14.696  14.682  38.879  1.00  0.00           H
ATOM   1665  N   TYR A 801     -13.239  16.213  41.391  1.00 51.79           N
ATOM   1666  CA  TYR A 801     -12.325  15.634  42.326  1.00 51.01           C
ATOM   1667  C   TYR A 801     -12.842  15.639  43.735  1.00 52.31           C
ATOM   1668  O   TYR A 801     -12.730  14.666  44.431  1.00 52.69           O
ATOM   1669  CB  TYR A 801     -11.023  16.403  42.266  1.00 50.48           C
ATOM   1670  CG  TYR A 801      -9.873  15.730  42.920  1.00 48.27           C
ATOM   1671  CD1 TYR A 801      -9.241  14.688  42.324  1.00 48.15           C
ATOM   1672  CD2 TYR A 801      -9.420  16.142  44.126  1.00 47.02           C
ATOM   1673  CE1 TYR A 801      -8.195  14.083  42.919  1.00 48.94           C
ATOM   1674  CE2 TYR A 801      -8.387  15.540  44.723  1.00 47.16           C
ATOM   1675  CZ  TYR A 801      -7.772  14.514  44.118  1.00 48.35           C
ATOM   1676  OH  TYR A 801      -6.723  13.903  44.720  1.00 45.54           O
ATOM   1677  H   TYR A 801     -12.974  17.043  40.879  1.00  0.00           H
ATOM   1678  HA  TYR A 801     -12.135  14.602  42.021  1.00  0.00           H
ATOM   1679  HB2 TYR A 801     -10.745  16.570  41.224  1.00  0.00           H
ATOM   1680  HB3 TYR A 801     -11.151  17.386  42.689  1.00  0.00           H
ATOM   1681  HD1 TYR A 801      -9.575  14.336  41.359  1.00  0.00           H
ATOM   1682  HD2 TYR A 801      -9.903  16.968  44.628  1.00  0.00           H
ATOM   1683  HE1 TYR A 801      -7.705  13.255  42.428  1.00  0.00           H
ATOM   1684  HE2 TYR A 801      -8.048  15.885  45.689  1.00  0.00           H
ATOM   1685  HH  TYR A 801      -6.308  13.252  44.173  1.00  0.00           H
ATOM   1686  N   VAL A 802     -13.422  16.736  44.165  1.00 53.70           N
ATOM   1687  CA  VAL A 802     -13.900  16.829  45.524  1.00 53.50           C
ATOM   1688  C   VAL A 802     -14.993  15.856  45.787  1.00 54.85           C
ATOM   1689  O   VAL A 802     -15.126  15.346  46.862  1.00 56.24           O
ATOM   1690  CB  VAL A 802     -14.328  18.207  45.887  1.00 52.98           C
ATOM   1691  CG1 VAL A 802     -13.159  19.049  45.978  1.00 52.84           C
ATOM   1692  CG2 VAL A 802     -15.244  18.750  44.888  1.00 52.84           C
ATOM   1693  H   VAL A 802     -13.513  17.535  43.550  1.00  0.00           H
ATOM   1694  HA  VAL A 802     -13.084  16.544  46.185  1.00  0.00           H
ATOM   1695  HB  VAL A 802     -14.814  18.203  46.864  1.00  0.00           H
ATOM   1696 HG11 VAL A 802     -13.424  20.068  46.260  1.00  0.00           H
ATOM   1697 HG12 VAL A 802     -12.458  18.695  46.727  1.00  0.00           H
ATOM   1698 HG13 VAL A 802     -12.630  19.084  45.032  1.00  0.00           H
ATOM   1699 HG21 VAL A 802     -15.566  19.747  45.192  1.00  0.00           H
ATOM   1700 HG22 VAL A 802     -14.808  18.877  43.908  1.00  0.00           H
ATOM   1701 HG23 VAL A 802     -16.166  18.183  44.788  1.00  0.00           H
ATOM   1702  N   ARG A 803     -15.821  15.642  44.808  1.00 55.48           N
ATOM   1703  CA  ARG A 803     -16.866  14.696  44.956  1.00 57.41           C
ATOM   1704  C   ARG A 803     -16.346  13.290  45.132  1.00 59.87           C
ATOM   1705  O   ARG A 803     -16.881  12.514  45.897  1.00 60.10           O
ATOM   1706  CB  ARG A 803     -17.750  14.760  43.740  1.00 57.26           C
ATOM   1707  CG  ARG A 803     -18.392  16.086  43.537  1.00 55.56           C
ATOM   1708  CD  ARG A 803     -19.340  16.062  42.399  1.00 52.22           C
ATOM   1709  NE  ARG A 803     -20.249  17.177  42.468  1.00 52.78           N
ATOM   1710  CZ  ARG A 803     -20.874  17.689  41.432  1.00 56.12           C
ATOM   1711  NH1 ARG A 803     -20.690  17.180  40.243  1.00 59.48           N
ATOM   1712  NH2 ARG A 803     -21.683  18.706  41.581  1.00 55.69           N1+
ATOM   1713  H   ARG A 803     -15.683  16.096  43.916  1.00  0.00           H
ATOM   1714  HA  ARG A 803     -17.466  14.952  45.832  1.00  0.00           H
ATOM   1715  HB2 ARG A 803     -17.184  14.499  42.844  1.00  0.00           H
ATOM   1716  HB3 ARG A 803     -18.528  13.999  43.831  1.00  0.00           H
ATOM   1717  HG2 ARG A 803     -18.965  16.271  44.445  1.00  0.00           H
ATOM   1718  HG3 ARG A 803     -17.684  16.896  43.475  1.00  0.00           H
ATOM   1719  HD2 ARG A 803     -18.762  16.078  41.474  1.00  0.00           H
ATOM   1720  HD3 ARG A 803     -19.937  15.149  42.394  1.00  0.00           H
ATOM   1721  HE  ARG A 803     -20.436  17.566  43.382  1.00  0.00           H
ATOM   1722 HH11 ARG A 803     -20.048  16.410  40.116  1.00  0.00           H
ATOM   1723 HH12 ARG A 803     -21.144  17.576  39.433  1.00  0.00           H
ATOM   1724 HH21 ARG A 803     -21.788  19.120  42.504  1.00  0.00           H
ATOM   1725 HH22 ARG A 803     -22.141  19.131  40.789  1.00  0.00           H
ATOM   1726  N   GLU A 804     -15.301  12.932  44.415  1.00 62.64           N
ATOM   1727  CA  GLU A 804     -14.703  11.609  44.558  1.00 65.46           C
ATOM   1728  C   GLU A 804     -13.982  11.283  45.853  1.00 66.35           C
ATOM   1729  O   GLU A 804     -14.023  10.166  46.312  1.00 67.07           O
ATOM   1730  CB  GLU A 804     -13.845  11.244  43.361  1.00 67.58           C
ATOM   1731  CG  GLU A 804     -14.646  10.855  42.149  1.00 72.87           C
ATOM   1732  CD  GLU A 804     -15.240   9.461  42.227  1.00 76.30           C
ATOM   1733  OE1 GLU A 804     -14.479   8.488  42.327  1.00 77.89           O
ATOM   1734  OE2 GLU A 804     -16.476   9.330  42.168  1.00 77.23           O1-
ATOM   1735  H   GLU A 804     -14.876  13.589  43.774  1.00  0.00           H
ATOM   1736  HA  GLU A 804     -15.533  10.899  44.553  1.00  0.00           H
ATOM   1737  HB2 GLU A 804     -13.227  12.102  43.096  1.00  0.00           H
ATOM   1738  HB3 GLU A 804     -13.152  10.434  43.598  1.00  0.00           H
ATOM   1739  HG2 GLU A 804     -15.433  11.585  41.956  1.00  0.00           H
ATOM   1740  HG3 GLU A 804     -13.997  10.877  41.273  1.00  0.00           H
ATOM   1741  N   HIS A 805     -13.296  12.245  46.432  1.00 68.23           N
ATOM   1742  CA  HIS A 805     -12.569  11.983  47.661  1.00 70.65           C
ATOM   1743  C   HIS A 805     -12.966  12.804  48.849  1.00 71.44           C
ATOM   1744  O   HIS A 805     -12.145  13.094  49.689  1.00 71.78           O
ATOM   1745  CB  HIS A 805     -11.079  12.144  47.484  1.00 72.58           C
ATOM   1746  CG  HIS A 805     -10.592  11.769  46.133  1.00 74.13           C
ATOM   1747  ND1 HIS A 805     -11.254  12.122  44.987  1.00 75.68           N
ATOM   1748  CD2 HIS A 805      -9.509  11.069  45.746  1.00 74.53           C
ATOM   1749  CE1 HIS A 805     -10.592  11.660  43.946  1.00 76.28           C
ATOM   1750  NE2 HIS A 805      -9.531  11.017  44.381  1.00 76.36           N
ATOM   1751  H   HIS A 805     -13.230  13.156  45.998  1.00  0.00           H
ATOM   1752  HA  HIS A 805     -12.698  10.960  48.018  1.00  0.00           H
ATOM   1753  HB2 HIS A 805     -10.781  13.190  47.582  1.00  0.00           H
ATOM   1754  HB3 HIS A 805     -10.523  11.584  48.239  1.00  0.00           H
ATOM   1755  HD2 HIS A 805      -8.724  10.606  46.325  1.00  0.00           H
ATOM   1756  HE1 HIS A 805     -10.870  11.791  42.911  1.00  0.00           H
ATOM   1757  HE2 HIS A 805      -8.847  10.556  43.798  1.00  0.00           H
ATOM   1758  N   LYS A 806     -14.222  13.125  49.009  1.00 71.57           N
ATOM   1759  CA  LYS A 806     -14.494  13.969  50.118  1.00 72.27           C
ATOM   1760  C   LYS A 806     -13.837  13.255  51.252  1.00 73.55           C
ATOM   1761  O   LYS A 806     -13.251  13.864  52.117  1.00 74.01           O
ATOM   1762  CB  LYS A 806     -15.967  13.984  50.414  1.00 70.61           C
ATOM   1763  CG  LYS A 806     -16.825  13.696  49.260  1.00 69.95           C
ATOM   1764  CD  LYS A 806     -18.238  14.028  49.620  1.00 70.63           C
ATOM   1765  CE  LYS A 806     -19.155  13.888  48.447  1.00 72.35           C
ATOM   1766  NZ  LYS A 806     -19.464  15.186  47.802  1.00 72.23           N1+
ATOM   1767  H   LYS A 806     -14.937  12.887  48.336  1.00  0.00           H
ATOM   1768  HA  LYS A 806     -14.267  15.015  49.994  1.00  0.00           H
ATOM   1769  HB2 LYS A 806     -16.255  13.274  51.195  1.00  0.00           H
ATOM   1770  HB3 LYS A 806     -16.211  14.960  50.837  1.00  0.00           H
ATOM   1771  HG2 LYS A 806     -16.551  14.311  48.413  1.00  0.00           H
ATOM   1772  HG3 LYS A 806     -16.755  12.651  48.953  1.00  0.00           H
ATOM   1773  HD2 LYS A 806     -18.561  13.331  50.395  1.00  0.00           H
ATOM   1774  HD3 LYS A 806     -18.333  15.020  50.063  1.00  0.00           H
ATOM   1775  HE2 LYS A 806     -18.767  13.189  47.706  1.00  0.00           H
ATOM   1776  HE3 LYS A 806     -20.106  13.473  48.784  1.00  0.00           H
ATOM   1777  HZ1 LYS A 806     -20.085  15.037  47.021  1.00  0.00           H
ATOM   1778  HZ2 LYS A 806     -19.911  15.802  48.466  1.00  0.00           H
ATOM   1779  HZ3 LYS A 806     -18.620  15.634  47.472  1.00  0.00           H
ATOM   1780  N   ASP A 807     -13.896  11.943  51.219  1.00 74.22           N
ATOM   1781  CA  ASP A 807     -13.439  11.141  52.319  1.00 74.20           C
ATOM   1782  C   ASP A 807     -12.009  11.365  52.641  1.00 73.41           C
ATOM   1783  O   ASP A 807     -11.624  11.305  53.780  1.00 73.28           O
ATOM   1784  CB  ASP A 807     -13.711   9.694  52.041  1.00 76.05           C
ATOM   1785  CG  ASP A 807     -15.158   9.433  51.920  1.00 77.75           C
ATOM   1786  OD1 ASP A 807     -15.556   8.329  51.519  1.00 78.39           O
ATOM   1787  OD2 ASP A 807     -15.904  10.363  52.229  1.00 77.60           O1-
ATOM   1788  H   ASP A 807     -14.397  11.488  50.470  1.00  0.00           H
ATOM   1789  HA  ASP A 807     -13.979  11.453  53.218  1.00  0.00           H
ATOM   1790  HB2 ASP A 807     -13.217   9.375  51.121  1.00  0.00           H
ATOM   1791  HB3 ASP A 807     -13.323   9.065  52.844  1.00  0.00           H
ATOM   1792  N   ASN A 808     -11.179  11.591  51.664  1.00 72.85           N
ATOM   1793  CA  ASN A 808      -9.834  11.909  52.055  1.00 72.64           C
ATOM   1794  C   ASN A 808      -9.476  13.370  51.952  1.00 71.75           C
ATOM   1795  O   ASN A 808      -8.341  13.722  52.153  1.00 72.94           O
ATOM   1796  CB  ASN A 808      -8.836  11.027  51.346  1.00 74.91           C
ATOM   1797  CG  ASN A 808      -9.217   9.596  51.417  1.00 76.36           C
ATOM   1798  OD1 ASN A 808     -10.387   9.270  51.364  1.00 77.91           O
ATOM   1799  ND2 ASN A 808      -8.247   8.732  51.559  1.00 76.49           N
ATOM   1800  H   ASN A 808     -11.487  11.687  50.706  1.00  0.00           H
ATOM   1801  HA  ASN A 808      -9.565  11.703  53.091  1.00  0.00           H
ATOM   1802  HB2 ASN A 808      -8.784  11.299  50.290  1.00  0.00           H
ATOM   1803  HB3 ASN A 808      -7.833  11.170  51.755  1.00  0.00           H
ATOM   1804 HD21 ASN A 808      -7.289   9.045  51.568  1.00  0.00           H
ATOM   1805 HD22 ASN A 808      -8.468   7.748  51.614  1.00  0.00           H
ATOM   1806  N   ILE A 809     -10.428  14.232  51.643  1.00 68.91           N
ATOM   1807  CA  ILE A 809     -10.089  15.634  51.561  1.00 65.92           C
ATOM   1808  C   ILE A 809      -9.996  16.230  52.917  1.00 64.92           C
ATOM   1809  O   ILE A 809     -10.881  16.046  53.706  1.00 64.21           O
ATOM   1810  CB  ILE A 809     -11.083  16.419  50.803  1.00 65.62           C
ATOM   1811  CG1 ILE A 809     -11.468  15.675  49.553  1.00 66.09           C
ATOM   1812  CG2 ILE A 809     -10.462  17.690  50.388  1.00 65.51           C
ATOM   1813  CD1 ILE A 809     -11.260  16.469  48.371  1.00 65.98           C
ATOM   1814  H   ILE A 809     -11.383  13.932  51.492  1.00  0.00           H
ATOM   1815  HA  ILE A 809      -9.129  15.727  51.044  1.00  0.00           H
ATOM   1816  HB  ILE A 809     -11.956  16.523  51.428  1.00  0.00           H
ATOM   1817 HG12 ILE A 809     -10.789  14.854  49.338  1.00  0.00           H
ATOM   1818 HG13 ILE A 809     -12.489  15.419  49.536  1.00  0.00           H
ATOM   1819 HG21 ILE A 809     -11.129  18.390  49.884  1.00  0.00           H
ATOM   1820 HG22 ILE A 809     -10.216  18.287  51.264  1.00  0.00           H
ATOM   1821 HG23 ILE A 809      -9.509  17.608  49.862  1.00  0.00           H
ATOM   1822 HD11 ILE A 809     -11.545  15.842  47.527  1.00  0.00           H
ATOM   1823 HD12 ILE A 809     -11.920  17.330  48.297  1.00  0.00           H
ATOM   1824 HD13 ILE A 809     -10.226  16.710  48.133  1.00  0.00           H
ATOM   1825  N   GLY A 810      -8.939  17.001  53.132  1.00 63.40           N
ATOM   1826  CA  GLY A 810      -8.512  17.516  54.409  1.00 61.05           C
ATOM   1827  C   GLY A 810      -8.389  19.005  54.410  1.00 59.33           C
ATOM   1828  O   GLY A 810      -8.459  19.597  53.390  1.00 59.14           O
ATOM   1829  H   GLY A 810      -8.301  17.141  52.363  1.00  0.00           H
ATOM   1830  HA2 GLY A 810      -9.188  17.209  55.208  1.00  0.00           H
ATOM   1831  HA3 GLY A 810      -7.539  17.085  54.646  1.00  0.00           H
ATOM   1832  N   SER A 811      -8.260  19.634  55.564  1.00 58.95           N
ATOM   1833  CA  SER A 811      -8.391  21.084  55.548  1.00 57.21           C
ATOM   1834  C   SER A 811      -7.275  21.707  54.741  1.00 55.97           C
ATOM   1835  O   SER A 811      -7.512  22.666  54.026  1.00 55.83           O
ATOM   1836  CB  SER A 811      -8.510  21.687  56.971  1.00 56.98           C
ATOM   1837  OG  SER A 811      -7.327  21.535  57.738  1.00 57.23           O
ATOM   1838  H   SER A 811      -8.239  19.128  56.443  1.00  0.00           H
ATOM   1839  HA  SER A 811      -9.323  21.343  55.040  1.00  0.00           H
ATOM   1840  HB2 SER A 811      -8.675  22.759  56.879  1.00  0.00           H
ATOM   1841  HB3 SER A 811      -9.354  21.292  57.533  1.00  0.00           H
ATOM   1842  HG  SER A 811      -7.319  20.651  58.094  1.00  0.00           H
ATOM   1843  N   GLN A 812      -6.074  21.140  54.827  1.00 54.96           N
ATOM   1844  CA  GLN A 812      -4.909  21.847  54.338  1.00 53.46           C
ATOM   1845  C   GLN A 812      -5.098  22.013  52.875  1.00 53.13           C
ATOM   1846  O   GLN A 812      -4.758  23.061  52.299  1.00 52.13           O
ATOM   1847  CB  GLN A 812      -3.639  21.076  54.638  1.00 53.39           C
ATOM   1848  CG  GLN A 812      -2.359  21.735  54.104  1.00 55.39           C
ATOM   1849  CD  GLN A 812      -2.034  23.111  54.714  1.00 56.59           C
ATOM   1850  OE1 GLN A 812      -1.214  23.213  55.632  1.00 56.41           O
ATOM   1851  NE2 GLN A 812      -2.651  24.173  54.179  1.00 57.84           N
ATOM   1852  H   GLN A 812      -5.946  20.333  55.421  1.00  0.00           H
ATOM   1853  HA  GLN A 812      -4.879  22.827  54.818  1.00  0.00           H
ATOM   1854  HB2 GLN A 812      -3.548  20.952  55.718  1.00  0.00           H
ATOM   1855  HB3 GLN A 812      -3.709  20.065  54.231  1.00  0.00           H
ATOM   1856  HG2 GLN A 812      -1.525  21.079  54.358  1.00  0.00           H
ATOM   1857  HG3 GLN A 812      -2.349  21.753  53.022  1.00  0.00           H
ATOM   1858 HE21 GLN A 812      -3.286  24.045  53.401  1.00  0.00           H
ATOM   1859 HE22 GLN A 812      -2.484  25.089  54.571  1.00  0.00           H
ATOM   1860  N   TYR A 813      -5.699  20.979  52.286  1.00 53.23           N
ATOM   1861  CA  TYR A 813      -5.929  20.933  50.857  1.00 53.04           C
ATOM   1862  C   TYR A 813      -6.874  22.025  50.391  1.00 51.19           C
ATOM   1863  O   TYR A 813      -6.501  22.852  49.553  1.00 50.77           O
ATOM   1864  CB  TYR A 813      -6.343  19.529  50.406  1.00 56.25           C
ATOM   1865  CG  TYR A 813      -5.129  18.665  50.100  1.00 60.40           C
ATOM   1866  CD1 TYR A 813      -4.624  18.561  48.783  1.00 61.68           C
ATOM   1867  CD2 TYR A 813      -4.446  17.977  51.121  1.00 60.98           C
ATOM   1868  CE1 TYR A 813      -3.491  17.774  48.491  1.00 63.08           C
ATOM   1869  CE2 TYR A 813      -3.303  17.193  50.831  1.00 62.88           C
ATOM   1870  CZ  TYR A 813      -2.845  17.108  49.523  1.00 63.96           C
ATOM   1871  OH  TYR A 813      -1.751  16.349  49.244  1.00 65.11           O
ATOM   1872  H   TYR A 813      -5.990  20.193  52.849  1.00  0.00           H
ATOM   1873  HA  TYR A 813      -4.976  21.159  50.372  1.00  0.00           H
ATOM   1874  HB2 TYR A 813      -6.970  19.040  51.152  1.00  0.00           H
ATOM   1875  HB3 TYR A 813      -6.948  19.580  49.498  1.00  0.00           H
ATOM   1876  HD1 TYR A 813      -5.114  19.089  47.978  1.00  0.00           H
ATOM   1877  HD2 TYR A 813      -4.794  18.047  52.141  1.00  0.00           H
ATOM   1878  HE1 TYR A 813      -3.126  17.697  47.478  1.00  0.00           H
ATOM   1879  HE2 TYR A 813      -2.790  16.677  51.627  1.00  0.00           H
ATOM   1880  HH  TYR A 813      -1.366  15.959  50.014  1.00  0.00           H
ATOM   1881  N   LEU A 814      -8.071  22.050  50.966  1.00 48.99           N
ATOM   1882  CA  LEU A 814      -9.099  23.022  50.568  1.00 47.72           C
ATOM   1883  C   LEU A 814      -8.649  24.470  50.618  1.00 48.48           C
ATOM   1884  O   LEU A 814      -8.902  25.245  49.719  1.00 49.27           O
ATOM   1885  CB  LEU A 814     -10.315  22.875  51.447  1.00 46.04           C
ATOM   1886  CG  LEU A 814     -11.080  21.595  51.210  1.00 45.19           C
ATOM   1887  CD1 LEU A 814     -11.932  21.219  52.451  1.00 43.70           C
ATOM   1888  CD2 LEU A 814     -11.904  21.795  49.976  1.00 42.30           C
ATOM   1889  H   LEU A 814      -8.298  21.370  51.679  1.00  0.00           H
ATOM   1890  HA  LEU A 814      -9.353  22.819  49.529  1.00  0.00           H
ATOM   1891  HB2 LEU A 814      -9.992  22.914  52.490  1.00  0.00           H
ATOM   1892  HB3 LEU A 814     -10.993  23.720  51.326  1.00  0.00           H
ATOM   1893  HG  LEU A 814     -10.387  20.771  51.038  1.00  0.00           H
ATOM   1894 HD11 LEU A 814     -12.485  20.294  52.282  1.00  0.00           H
ATOM   1895 HD12 LEU A 814     -11.294  21.066  53.319  1.00  0.00           H
ATOM   1896 HD13 LEU A 814     -12.653  22.000  52.694  1.00  0.00           H
ATOM   1897 HD21 LEU A 814     -12.477  20.894  49.755  1.00  0.00           H
ATOM   1898 HD22 LEU A 814     -12.621  22.607  50.100  1.00  0.00           H
ATOM   1899 HD23 LEU A 814     -11.313  22.010  49.091  1.00  0.00           H
ATOM   1900  N   LEU A 815      -7.969  24.835  51.684  1.00 49.53           N
ATOM   1901  CA  LEU A 815      -7.416  26.175  51.780  1.00 49.86           C
ATOM   1902  C   LEU A 815      -6.340  26.427  50.739  1.00 50.89           C
ATOM   1903  O   LEU A 815      -6.345  27.473  50.121  1.00 50.80           O
ATOM   1904  CB  LEU A 815      -6.845  26.430  53.158  1.00 48.25           C
ATOM   1905  CG  LEU A 815      -7.887  26.607  54.231  1.00 47.09           C
ATOM   1906  CD1 LEU A 815      -7.170  26.827  55.550  1.00 46.91           C
ATOM   1907  CD2 LEU A 815      -8.695  27.783  53.855  1.00 45.71           C
ATOM   1908  H   LEU A 815      -7.775  24.166  52.417  1.00  0.00           H
ATOM   1909  HA  LEU A 815      -8.190  26.889  51.515  1.00  0.00           H
ATOM   1910  HB2 LEU A 815      -6.182  25.605  53.427  1.00  0.00           H
ATOM   1911  HB3 LEU A 815      -6.207  27.318  53.137  1.00  0.00           H
ATOM   1912  HG  LEU A 815      -8.513  25.719  54.299  1.00  0.00           H
ATOM   1913 HD11 LEU A 815      -7.868  26.915  56.384  1.00  0.00           H
ATOM   1914 HD12 LEU A 815      -6.479  26.017  55.760  1.00  0.00           H
ATOM   1915 HD13 LEU A 815      -6.607  27.747  55.477  1.00  0.00           H
ATOM   1916 HD21 LEU A 815      -9.406  27.989  54.656  1.00  0.00           H
ATOM   1917 HD22 LEU A 815      -8.041  28.651  53.830  1.00  0.00           H
ATOM   1918 HD23 LEU A 815      -9.320  27.679  52.972  1.00  0.00           H
ATOM   1919  N   ASN A 816      -5.414  25.484  50.543  1.00 51.93           N
ATOM   1920  CA  ASN A 816      -4.415  25.684  49.501  1.00 52.70           C
ATOM   1921  C   ASN A 816      -5.093  25.908  48.151  1.00 52.24           C
ATOM   1922  O   ASN A 816      -4.728  26.828  47.394  1.00 52.45           O
ATOM   1923  CB  ASN A 816      -3.408  24.535  49.427  1.00 54.44           C
ATOM   1924  CG  ASN A 816      -2.516  24.454  50.658  1.00 56.84           C
ATOM   1925  OD1 ASN A 816      -2.501  23.281  51.255  1.00 56.96           O
ATOM   1926  ND2 ASN A 816      -1.846  25.421  51.067  1.00 58.06           N
ATOM   1927  H   ASN A 816      -5.426  24.619  51.068  1.00  0.00           H
ATOM   1928  HA  ASN A 816      -3.873  26.605  49.727  1.00  0.00           H
ATOM   1929  HB2 ASN A 816      -3.923  23.584  49.286  1.00  0.00           H
ATOM   1930  HB3 ASN A 816      -2.758  24.659  48.559  1.00  0.00           H
ATOM   1931 HD21 ASN A 816      -1.878  26.305  50.582  1.00  0.00           H
ATOM   1932 HD22 ASN A 816      -1.264  25.307  51.884  1.00  0.00           H
ATOM   1933  N   TRP A 817      -6.103  25.092  47.867  1.00 50.55           N
ATOM   1934  CA  TRP A 817      -6.807  25.218  46.622  1.00 48.81           C
ATOM   1935  C   TRP A 817      -7.349  26.609  46.448  1.00 47.95           C
ATOM   1936  O   TRP A 817      -7.132  27.231  45.404  1.00 47.88           O
ATOM   1937  CB  TRP A 817      -7.921  24.210  46.541  1.00 48.81           C
ATOM   1938  CG  TRP A 817      -7.391  22.874  46.312  1.00 50.58           C
ATOM   1939  CD1 TRP A 817      -6.152  22.544  45.807  1.00 51.33           C
ATOM   1940  CD2 TRP A 817      -8.063  21.645  46.538  1.00 50.33           C
ATOM   1941  NE1 TRP A 817      -6.022  21.175  45.724  1.00 51.13           N
ATOM   1942  CE3 TRP A 817      -9.315  21.318  47.024  1.00 49.94           C
ATOM   1943  CE2 TRP A 817      -7.185  20.605  46.162  1.00 49.90           C
ATOM   1944  CZ3 TRP A 817      -9.646  20.024  47.122  1.00 49.10           C
ATOM   1945  CZ2 TRP A 817      -7.530  19.293  46.257  1.00 49.15           C
ATOM   1946  CH2 TRP A 817      -8.767  19.022  46.740  1.00 49.81           C
ATOM   1947  H   TRP A 817      -6.361  24.354  48.512  1.00  0.00           H
ATOM   1948  HA  TRP A 817      -6.112  25.111  45.790  1.00  0.00           H
ATOM   1949  HB2 TRP A 817      -8.522  24.205  47.449  1.00  0.00           H
ATOM   1950  HB3 TRP A 817      -8.601  24.435  45.717  1.00  0.00           H
ATOM   1951  HD1 TRP A 817      -5.370  23.223  45.508  1.00  0.00           H
ATOM   1952  HE1 TRP A 817      -5.198  20.686  45.391  1.00  0.00           H
ATOM   1953  HE3 TRP A 817     -10.010  22.094  47.304  1.00  0.00           H
ATOM   1954  HZ3 TRP A 817     -10.618  19.758  47.508  1.00  0.00           H
ATOM   1955  HZ2 TRP A 817      -6.854  18.504  45.962  1.00  0.00           H
ATOM   1956  HH2 TRP A 817      -9.073  17.992  46.819  1.00  0.00           H
ATOM   1957  N   CYS A 818      -8.025  27.105  47.479  1.00 45.73           N
ATOM   1958  CA  CYS A 818      -8.522  28.466  47.450  1.00 43.51           C
ATOM   1959  C   CYS A 818      -7.420  29.446  47.060  1.00 43.35           C
ATOM   1960  O   CYS A 818      -7.598  30.249  46.149  1.00 42.61           O
ATOM   1961  CB  CYS A 818      -9.088  28.842  48.802  1.00 42.32           C
ATOM   1962  SG  CYS A 818     -10.599  27.966  49.232  1.00 41.02           S
ATOM   1963  H   CYS A 818      -8.165  26.546  48.310  1.00  0.00           H
ATOM   1964  HA  CYS A 818      -9.315  28.531  46.702  1.00  0.00           H
ATOM   1965  HB2 CYS A 818      -8.372  28.694  49.605  1.00  0.00           H
ATOM   1966  HB3 CYS A 818      -9.335  29.902  48.832  1.00  0.00           H
ATOM   1967  HG  CYS A 818     -10.051  26.746  49.260  1.00  0.00           H
ATOM   1968  N   VAL A 819      -6.282  29.357  47.748  1.00 43.47           N
ATOM   1969  CA  VAL A 819      -5.154  30.245  47.536  1.00 43.53           C
ATOM   1970  C   VAL A 819      -4.677  30.141  46.106  1.00 44.07           C
ATOM   1971  O   VAL A 819      -4.392  31.138  45.446  1.00 42.51           O
ATOM   1972  CB  VAL A 819      -4.007  29.863  48.456  1.00 44.32           C
ATOM   1973  CG1 VAL A 819      -2.723  30.629  48.107  1.00 43.15           C
ATOM   1974  CG2 VAL A 819      -4.410  30.097  49.918  1.00 45.27           C
ATOM   1975  H   VAL A 819      -6.201  28.653  48.471  1.00  0.00           H
ATOM   1976  HA  VAL A 819      -5.465  31.274  47.730  1.00  0.00           H
ATOM   1977  HB  VAL A 819      -3.770  28.807  48.363  1.00  0.00           H
ATOM   1978 HG11 VAL A 819      -1.981  30.510  48.897  1.00  0.00           H
ATOM   1979 HG12 VAL A 819      -2.250  30.261  47.198  1.00  0.00           H
ATOM   1980 HG13 VAL A 819      -2.908  31.697  47.997  1.00  0.00           H
ATOM   1981 HG21 VAL A 819      -3.632  29.752  50.599  1.00  0.00           H
ATOM   1982 HG22 VAL A 819      -4.561  31.160  50.100  1.00  0.00           H
ATOM   1983 HG23 VAL A 819      -5.320  29.585  50.190  1.00  0.00           H
ATOM   1984  N   GLN A 820      -4.554  28.937  45.608  1.00 45.36           N
ATOM   1985  CA  GLN A 820      -4.144  28.781  44.242  1.00 46.05           C
ATOM   1986  C   GLN A 820      -5.139  29.354  43.270  1.00 45.31           C
ATOM   1987  O   GLN A 820      -4.786  30.108  42.428  1.00 45.84           O
ATOM   1988  CB  GLN A 820      -3.941  27.310  43.971  1.00 47.02           C
ATOM   1989  CG  GLN A 820      -3.178  26.626  45.059  1.00 50.22           C
ATOM   1990  CD  GLN A 820      -2.417  25.429  44.586  1.00 51.73           C
ATOM   1991  OE1 GLN A 820      -2.942  24.586  43.908  1.00 51.71           O
ATOM   1992  NE2 GLN A 820      -1.178  25.341  44.970  1.00 52.48           N
ATOM   1993  H   GLN A 820      -4.771  28.120  46.167  1.00  0.00           H
ATOM   1994  HA  GLN A 820      -3.180  29.276  44.102  1.00  0.00           H
ATOM   1995  HB2 GLN A 820      -4.909  26.811  43.887  1.00  0.00           H
ATOM   1996  HB3 GLN A 820      -3.499  27.175  42.997  1.00  0.00           H
ATOM   1997  HG2 GLN A 820      -2.594  27.264  45.725  1.00  0.00           H
ATOM   1998  HG3 GLN A 820      -3.901  26.033  45.582  1.00  0.00           H
ATOM   1999 HE21 GLN A 820      -0.773  26.060  45.550  1.00  0.00           H
ATOM   2000 HE22 GLN A 820      -0.635  24.531  44.706  1.00  0.00           H
ATOM   2001  N   ILE A 821      -6.405  29.057  43.433  1.00 44.04           N
ATOM   2002  CA  ILE A 821      -7.411  29.649  42.591  1.00 42.62           C
ATOM   2003  C   ILE A 821      -7.379  31.156  42.667  1.00 43.43           C
ATOM   2004  O   ILE A 821      -7.567  31.833  41.668  1.00 43.65           O
ATOM   2005  CB  ILE A 821      -8.772  29.212  42.978  1.00 41.84           C
ATOM   2006  CG1 ILE A 821      -8.828  27.685  42.970  1.00 41.93           C
ATOM   2007  CG2 ILE A 821      -9.761  29.856  42.057  1.00 39.64           C
ATOM   2008  CD1 ILE A 821     -10.202  27.063  43.357  1.00 42.50           C
ATOM   2009  H   ILE A 821      -6.691  28.431  44.178  1.00  0.00           H
ATOM   2010  HA  ILE A 821      -7.210  29.348  41.559  1.00  0.00           H
ATOM   2011  HB  ILE A 821      -8.995  29.528  43.998  1.00  0.00           H
ATOM   2012 HG12 ILE A 821      -8.697  27.405  41.923  1.00  0.00           H
ATOM   2013 HG13 ILE A 821      -8.014  27.136  43.398  1.00  0.00           H
ATOM   2014 HG21 ILE A 821     -10.761  29.455  42.207  1.00  0.00           H
ATOM   2015 HG22 ILE A 821      -9.899  30.926  42.206  1.00  0.00           H
ATOM   2016 HG23 ILE A 821      -9.514  29.689  41.007  1.00  0.00           H
ATOM   2017 HD11 ILE A 821     -10.143  25.975  43.315  1.00  0.00           H
ATOM   2018 HD12 ILE A 821     -10.482  27.338  44.374  1.00  0.00           H
ATOM   2019 HD13 ILE A 821     -11.009  27.361  42.690  1.00  0.00           H
ATOM   2020  N   ALA A 822      -7.125  31.689  43.845  1.00 44.44           N
ATOM   2021  CA  ALA A 822      -7.100  33.143  43.993  1.00 46.29           C
ATOM   2022  C   ALA A 822      -5.863  33.731  43.328  1.00 47.50           C
ATOM   2023  O   ALA A 822      -5.892  34.844  42.812  1.00 47.06           O
ATOM   2024  CB  ALA A 822      -7.147  33.531  45.462  1.00 45.92           C
ATOM   2025  H   ALA A 822      -6.990  31.101  44.658  1.00  0.00           H
ATOM   2026  HA  ALA A 822      -7.984  33.570  43.515  1.00  0.00           H
ATOM   2027  HB1 ALA A 822      -7.310  34.602  45.574  1.00  0.00           H
ATOM   2028  HB2 ALA A 822      -7.968  33.049  45.975  1.00  0.00           H
ATOM   2029  HB3 ALA A 822      -6.236  33.254  45.993  1.00  0.00           H
ATOM   2030  N   LYS A 823      -4.767  33.011  43.378  1.00 48.90           N
ATOM   2031  CA  LYS A 823      -3.571  33.436  42.715  1.00 48.56           C
ATOM   2032  C   LYS A 823      -3.791  33.420  41.237  1.00 48.45           C
ATOM   2033  O   LYS A 823      -3.402  34.313  40.530  1.00 49.07           O
ATOM   2034  CB  LYS A 823      -2.446  32.512  43.080  1.00 47.89           C
ATOM   2035  CG  LYS A 823      -1.690  32.988  44.247  1.00 48.70           C
ATOM   2036  CD  LYS A 823      -0.809  31.926  44.795  1.00 51.59           C
ATOM   2037  CE  LYS A 823       0.172  32.511  45.749  1.00 53.22           C
ATOM   2038  NZ  LYS A 823       1.133  31.494  46.157  1.00 55.09           N1+
ATOM   2039  H   LYS A 823      -4.769  32.121  43.861  1.00  0.00           H
ATOM   2040  HA  LYS A 823      -3.285  34.448  42.971  1.00  0.00           H
ATOM   2041  HB2 LYS A 823      -2.816  31.503  43.254  1.00  0.00           H
ATOM   2042  HB3 LYS A 823      -1.736  32.412  42.255  1.00  0.00           H
ATOM   2043  HG2 LYS A 823      -1.113  33.868  43.958  1.00  0.00           H
ATOM   2044  HG3 LYS A 823      -2.374  33.310  45.033  1.00  0.00           H
ATOM   2045  HD2 LYS A 823      -1.404  31.145  45.268  1.00  0.00           H
ATOM   2046  HD3 LYS A 823      -0.267  31.450  43.976  1.00  0.00           H
ATOM   2047  HE2 LYS A 823       0.723  33.335  45.293  1.00  0.00           H
ATOM   2048  HE3 LYS A 823      -0.334  32.904  46.632  1.00  0.00           H
ATOM   2049  HZ1 LYS A 823       1.797  31.897  46.803  1.00  0.00           H
ATOM   2050  HZ2 LYS A 823       0.648  30.732  46.609  1.00  0.00           H
ATOM   2051  HZ3 LYS A 823       1.623  31.146  45.345  1.00  0.00           H
ATOM   2052  N   GLY A 824      -4.442  32.390  40.760  1.00 48.06           N
ATOM   2053  CA  GLY A 824      -4.678  32.312  39.337  1.00 49.07           C
ATOM   2054  C   GLY A 824      -5.455  33.549  38.919  1.00 50.00           C
ATOM   2055  O   GLY A 824      -5.014  34.370  38.114  1.00 50.28           O
ATOM   2056  H   GLY A 824      -4.754  31.642  41.368  1.00  0.00           H
ATOM   2057  HA2 GLY A 824      -3.734  32.255  38.791  1.00  0.00           H
ATOM   2058  HA3 GLY A 824      -5.226  31.398  39.116  1.00  0.00           H
ATOM   2059  N   MET A 825      -6.633  33.678  39.504  1.00 50.72           N
ATOM   2060  CA  MET A 825      -7.477  34.815  39.231  1.00 51.04           C
ATOM   2061  C   MET A 825      -6.764  36.168  39.364  1.00 50.78           C
ATOM   2062  O   MET A 825      -7.020  37.097  38.608  1.00 51.73           O
ATOM   2063  CB  MET A 825      -8.660  34.747  40.170  1.00 51.35           C
ATOM   2064  CG  MET A 825      -9.644  33.706  39.766  1.00 52.37           C
ATOM   2065  SD  MET A 825     -10.356  34.211  38.200  1.00 54.81           S
ATOM   2066  CE  MET A 825     -11.357  32.833  37.772  1.00 54.71           C
ATOM   2067  H   MET A 825      -6.943  32.990  40.179  1.00  0.00           H
ATOM   2068  HA  MET A 825      -7.776  34.751  38.185  1.00  0.00           H
ATOM   2069  HB2 MET A 825      -8.326  34.566  41.193  1.00  0.00           H
ATOM   2070  HB3 MET A 825      -9.168  35.710  40.193  1.00  0.00           H
ATOM   2071  HG2 MET A 825      -9.203  32.717  39.709  1.00  0.00           H
ATOM   2072  HG3 MET A 825     -10.441  33.645  40.506  1.00  0.00           H
ATOM   2073  HE1 MET A 825     -11.386  32.729  36.692  1.00  0.00           H
ATOM   2074  HE2 MET A 825     -10.832  31.977  38.170  1.00  0.00           H
ATOM   2075  HE3 MET A 825     -12.324  33.080  38.084  1.00  0.00           H
ATOM   2076  N   ASN A 826      -5.901  36.307  40.342  1.00 50.05           N
ATOM   2077  CA  ASN A 826      -5.251  37.575  40.542  1.00 48.57           C
ATOM   2078  C   ASN A 826      -4.444  37.890  39.349  1.00 47.61           C
ATOM   2079  O   ASN A 826      -4.403  39.002  38.906  1.00 47.43           O
ATOM   2080  CB  ASN A 826      -4.357  37.544  41.762  1.00 49.26           C
ATOM   2081  CG  ASN A 826      -3.848  38.899  42.143  1.00 50.90           C
ATOM   2082  OD1 ASN A 826      -2.682  39.070  42.413  1.00 52.29           O
ATOM   2083  ND2 ASN A 826      -4.719  39.865  42.174  1.00 51.42           N
ATOM   2084  H   ASN A 826      -5.722  35.548  40.987  1.00  0.00           H
ATOM   2085  HA  ASN A 826      -6.039  38.323  40.660  1.00  0.00           H
ATOM   2086  HB2 ASN A 826      -4.956  37.200  42.599  1.00  0.00           H
ATOM   2087  HB3 ASN A 826      -3.529  36.841  41.650  1.00  0.00           H
ATOM   2088 HD21 ASN A 826      -5.679  39.713  41.901  1.00  0.00           H
ATOM   2089 HD22 ASN A 826      -4.404  40.801  42.380  1.00  0.00           H
ATOM   2090  N   TYR A 827      -3.811  36.882  38.803  1.00 47.54           N
ATOM   2091  CA  TYR A 827      -2.960  37.079  37.668  1.00 46.88           C
ATOM   2092  C   TYR A 827      -3.757  37.648  36.548  1.00 46.55           C
ATOM   2093  O   TYR A 827      -3.360  38.566  35.919  1.00 46.39           O
ATOM   2094  CB  TYR A 827      -2.423  35.743  37.246  1.00 46.56           C
ATOM   2095  CG  TYR A 827      -1.482  35.801  36.115  1.00 45.95           C
ATOM   2096  CD1 TYR A 827      -0.277  36.393  36.250  1.00 47.55           C
ATOM   2097  CD2 TYR A 827      -1.791  35.247  34.915  1.00 46.92           C
ATOM   2098  CE1 TYR A 827       0.581  36.455  35.226  1.00 48.52           C
ATOM   2099  CE2 TYR A 827      -0.939  35.306  33.880  1.00 48.76           C
ATOM   2100  CZ  TYR A 827       0.249  35.916  34.035  1.00 49.73           C
ATOM   2101  OH  TYR A 827       1.133  35.983  32.995  1.00 50.30           O
ATOM   2102  H   TYR A 827      -3.900  35.954  39.196  1.00  0.00           H
ATOM   2103  HA  TYR A 827      -2.146  37.755  37.940  1.00  0.00           H
ATOM   2104  HB2 TYR A 827      -1.922  35.259  38.086  1.00  0.00           H
ATOM   2105  HB3 TYR A 827      -3.204  35.064  36.931  1.00  0.00           H
ATOM   2106  HD1 TYR A 827       0.003  36.833  37.196  1.00  0.00           H
ATOM   2107  HD2 TYR A 827      -2.736  34.744  34.776  1.00  0.00           H
ATOM   2108  HE1 TYR A 827       1.537  36.939  35.360  1.00  0.00           H
ATOM   2109  HE2 TYR A 827      -1.194  34.859  32.936  1.00  0.00           H
ATOM   2110  HH  TYR A 827       2.000  36.238  33.271  1.00  0.00           H
ATOM   2111  N   LEU A 828      -4.933  37.135  36.329  1.00 47.42           N
ATOM   2112  CA  LEU A 828      -5.760  37.641  35.280  1.00 48.76           C
ATOM   2113  C   LEU A 828      -6.099  39.087  35.521  1.00 50.87           C
ATOM   2114  O   LEU A 828      -6.251  39.853  34.613  1.00 50.26           O
ATOM   2115  CB  LEU A 828      -7.003  36.799  35.175  1.00 48.09           C
ATOM   2116  CG  LEU A 828      -6.695  35.324  35.030  1.00 47.56           C
ATOM   2117  CD1 LEU A 828      -7.937  34.541  34.852  1.00 46.62           C
ATOM   2118  CD2 LEU A 828      -5.792  35.093  33.893  1.00 46.79           C
ATOM   2119  H   LEU A 828      -5.272  36.377  36.906  1.00  0.00           H
ATOM   2120  HA  LEU A 828      -5.214  37.612  34.335  1.00  0.00           H
ATOM   2121  HB2 LEU A 828      -7.635  36.944  36.053  1.00  0.00           H
ATOM   2122  HB3 LEU A 828      -7.601  37.136  34.327  1.00  0.00           H
ATOM   2123  HG  LEU A 828      -6.218  34.948  35.933  1.00  0.00           H
ATOM   2124 HD11 LEU A 828      -7.731  33.471  34.800  1.00  0.00           H
ATOM   2125 HD12 LEU A 828      -8.620  34.693  35.688  1.00  0.00           H
ATOM   2126 HD13 LEU A 828      -8.467  34.822  33.941  1.00  0.00           H
ATOM   2127 HD21 LEU A 828      -5.682  34.027  33.691  1.00  0.00           H
ATOM   2128 HD22 LEU A 828      -6.167  35.554  32.978  1.00  0.00           H
ATOM   2129 HD23 LEU A 828      -4.785  35.465  34.071  1.00  0.00           H
ATOM   2130  N   GLU A 829      -6.280  39.453  36.764  1.00 54.61           N
ATOM   2131  CA  GLU A 829      -6.565  40.818  37.097  1.00 57.46           C
ATOM   2132  C   GLU A 829      -5.389  41.646  36.707  1.00 58.06           C
ATOM   2133  O   GLU A 829      -5.516  42.762  36.289  1.00 58.93           O
ATOM   2134  CB  GLU A 829      -6.773  40.944  38.580  1.00 59.89           C
ATOM   2135  CG  GLU A 829      -7.839  41.908  38.945  1.00 61.98           C
ATOM   2136  CD  GLU A 829      -7.858  42.172  40.387  1.00 63.63           C
ATOM   2137  OE1 GLU A 829      -8.782  42.827  40.851  1.00 65.03           O
ATOM   2138  OE2 GLU A 829      -6.948  41.720  41.070  1.00 64.49           O1-
ATOM   2139  H   GLU A 829      -6.175  38.779  37.511  1.00  0.00           H
ATOM   2140  HA  GLU A 829      -7.449  41.133  36.554  1.00  0.00           H
ATOM   2141  HB2 GLU A 829      -7.065  39.975  38.991  1.00  0.00           H
ATOM   2142  HB3 GLU A 829      -5.824  41.180  39.068  1.00  0.00           H
ATOM   2143  HG2 GLU A 829      -7.722  42.853  38.413  1.00  0.00           H
ATOM   2144  HG3 GLU A 829      -8.795  41.473  38.677  1.00  0.00           H
ATOM   2145  N   ASP A 830      -4.217  41.096  36.891  1.00 58.61           N
ATOM   2146  CA  ASP A 830      -3.024  41.811  36.550  1.00 60.78           C
ATOM   2147  C   ASP A 830      -3.002  42.079  35.069  1.00 61.99           C
ATOM   2148  O   ASP A 830      -2.498  43.072  34.632  1.00 64.21           O
ATOM   2149  CB  ASP A 830      -1.787  41.074  37.034  1.00 61.09           C
ATOM   2150  CG  ASP A 830      -1.529  41.292  38.514  1.00 63.31           C
ATOM   2151  OD1 ASP A 830      -2.064  42.241  39.086  1.00 62.93           O
ATOM   2152  OD2 ASP A 830      -0.796  40.516  39.122  1.00 63.87           O1-
ATOM   2153  H   ASP A 830      -4.143  40.169  37.289  1.00  0.00           H
ATOM   2154  HA  ASP A 830      -3.063  42.807  36.997  1.00  0.00           H
ATOM   2155  HB2 ASP A 830      -1.782  40.012  36.826  1.00  0.00           H
ATOM   2156  HB3 ASP A 830      -0.907  41.468  36.523  1.00  0.00           H
ATOM   2157  N   ARG A 831      -3.565  41.198  34.287  1.00 62.15           N
ATOM   2158  CA  ARG A 831      -3.478  41.352  32.863  1.00 62.48           C
ATOM   2159  C   ARG A 831      -4.708  41.984  32.320  1.00 62.22           C
ATOM   2160  O   ARG A 831      -4.932  41.988  31.140  1.00 62.04           O
ATOM   2161  CB  ARG A 831      -3.194  40.030  32.180  1.00 63.29           C
ATOM   2162  CG  ARG A 831      -1.981  39.302  32.738  1.00 65.37           C
ATOM   2163  CD  ARG A 831      -0.676  39.739  32.099  1.00 68.18           C
ATOM   2164  NE  ARG A 831      -0.864  40.065  30.698  1.00 71.94           N
ATOM   2165  CZ  ARG A 831      -0.064  39.693  29.707  1.00 73.25           C
ATOM   2166  NH1 ARG A 831      -0.351  40.050  28.473  1.00 72.99           N
ATOM   2167  NH2 ARG A 831       1.010  38.967  29.938  1.00 74.79           N1+
ATOM   2168  H   ARG A 831      -4.000  40.373  34.678  1.00  0.00           H
ATOM   2169  HA  ARG A 831      -2.654  41.999  32.554  1.00  0.00           H
ATOM   2170  HB2 ARG A 831      -4.046  39.384  32.403  1.00  0.00           H
ATOM   2171  HB3 ARG A 831      -3.227  40.098  31.093  1.00  0.00           H
ATOM   2172  HG2 ARG A 831      -1.902  39.367  33.822  1.00  0.00           H
ATOM   2173  HG3 ARG A 831      -2.105  38.237  32.535  1.00  0.00           H
ATOM   2174  HD2 ARG A 831      -0.313  40.640  32.595  1.00  0.00           H
ATOM   2175  HD3 ARG A 831       0.077  38.970  32.264  1.00  0.00           H
ATOM   2176  HE  ARG A 831      -1.661  40.648  30.485  1.00  0.00           H
ATOM   2177 HH11 ARG A 831      -1.187  40.581  28.276  1.00  0.00           H
ATOM   2178 HH12 ARG A 831       0.242  39.762  27.708  1.00  0.00           H
ATOM   2179 HH21 ARG A 831       1.211  38.652  30.876  1.00  0.00           H
ATOM   2180 HH22 ARG A 831       1.616  38.682  29.182  1.00  0.00           H
ATOM   2181  N   ARG A 832      -5.534  42.508  33.190  1.00 61.66           N
ATOM   2182  CA  ARG A 832      -6.685  43.194  32.703  1.00 62.53           C
ATOM   2183  C   ARG A 832      -7.644  42.279  32.030  1.00 60.79           C
ATOM   2184  O   ARG A 832      -8.318  42.673  31.119  1.00 60.23           O
ATOM   2185  CB  ARG A 832      -6.244  44.200  31.674  1.00 65.87           C
ATOM   2186  CG  ARG A 832      -5.702  45.467  32.239  1.00 71.37           C
ATOM   2187  CD  ARG A 832      -6.452  46.673  31.731  1.00 76.02           C
ATOM   2188  NE  ARG A 832      -6.026  47.888  32.412  1.00 79.72           N
ATOM   2189  CZ  ARG A 832      -6.828  48.659  33.134  1.00 81.75           C
ATOM   2190  NH1 ARG A 832      -8.106  48.340  33.260  1.00 81.32           N
ATOM   2191  NH2 ARG A 832      -6.354  49.748  33.729  1.00 82.87           N1+
ATOM   2192  H   ARG A 832      -5.338  42.482  34.182  1.00  0.00           H
ATOM   2193  HA  ARG A 832      -7.201  43.673  33.535  1.00  0.00           H
ATOM   2194  HB2 ARG A 832      -5.696  43.976  30.767  1.00  0.00           H
ATOM   2195  HB3 ARG A 832      -7.138  44.562  31.174  1.00  0.00           H
ATOM   2196  HG2 ARG A 832      -5.754  45.454  33.329  1.00  0.00           H
ATOM   2197  HG3 ARG A 832      -4.641  45.550  31.998  1.00  0.00           H
ATOM   2198  HD2 ARG A 832      -6.239  46.807  30.670  1.00  0.00           H
ATOM   2199  HD3 ARG A 832      -7.528  46.525  31.798  1.00  0.00           H
ATOM   2200  HE  ARG A 832      -5.053  48.141  32.318  1.00  0.00           H
ATOM   2201 HH11 ARG A 832      -8.742  48.934  33.773  1.00  0.00           H
ATOM   2202 HH12 ARG A 832      -8.477  47.533  32.782  1.00  0.00           H
ATOM   2203 HH21 ARG A 832      -5.384  50.011  33.624  1.00  0.00           H
ATOM   2204 HH22 ARG A 832      -6.962  50.322  34.295  1.00  0.00           H
ATOM   2205  N   LEU A 833      -7.731  41.053  32.486  1.00 59.19           N
ATOM   2206  CA  LEU A 833      -8.655  40.121  31.893  1.00 56.33           C
ATOM   2207  C   LEU A 833      -9.713  39.764  32.852  1.00 54.25           C
ATOM   2208  O   LEU A 833      -9.459  39.645  34.015  1.00 55.45           O
ATOM   2209  CB  LEU A 833      -7.952  38.844  31.547  1.00 56.81           C
ATOM   2210  CG  LEU A 833      -6.919  39.015  30.476  1.00 56.96           C
ATOM   2211  CD1 LEU A 833      -6.332  37.695  30.254  1.00 60.19           C
ATOM   2212  CD2 LEU A 833      -7.598  39.498  29.248  1.00 60.67           C
ATOM   2213  H   LEU A 833      -7.152  40.745  33.258  1.00  0.00           H
ATOM   2214  HA  LEU A 833      -9.176  40.534  31.036  1.00  0.00           H
ATOM   2215  HB2 LEU A 833      -7.470  38.440  32.439  1.00  0.00           H
ATOM   2216  HB3 LEU A 833      -8.679  38.090  31.231  1.00  0.00           H
ATOM   2217  HG  LEU A 833      -6.143  39.713  30.785  1.00  0.00           H
ATOM   2218 HD11 LEU A 833      -5.580  37.731  29.464  1.00  0.00           H
ATOM   2219 HD12 LEU A 833      -5.826  37.331  31.149  1.00  0.00           H
ATOM   2220 HD13 LEU A 833      -7.072  36.945  29.967  1.00  0.00           H
ATOM   2221 HD21 LEU A 833      -7.008  40.232  28.745  1.00  0.00           H
ATOM   2222 HD22 LEU A 833      -7.561  38.706  28.498  1.00  0.00           H
ATOM   2223 HD23 LEU A 833      -8.666  39.585  29.315  1.00  0.00           H
ATOM   2224  N   VAL A 834     -10.916  39.583  32.350  1.00 51.62           N
ATOM   2225  CA  VAL A 834     -12.020  39.175  33.181  1.00 49.11           C
ATOM   2226  C   VAL A 834     -12.349  37.783  32.781  1.00 47.22           C
ATOM   2227  O   VAL A 834     -12.436  37.497  31.639  1.00 46.97           O
ATOM   2228  CB  VAL A 834     -13.206  40.013  32.956  1.00 49.10           C
ATOM   2229  CG1 VAL A 834     -14.179  39.751  33.993  1.00 49.59           C
ATOM   2230  CG2 VAL A 834     -12.826  41.417  32.992  1.00 48.96           C
ATOM   2231  H   VAL A 834     -11.074  39.696  31.356  1.00  0.00           H
ATOM   2232  HA  VAL A 834     -11.769  39.186  34.245  1.00  0.00           H
ATOM   2233  HB  VAL A 834     -13.661  39.823  31.980  1.00  0.00           H
ATOM   2234 HG11 VAL A 834     -15.052  40.394  33.880  1.00  0.00           H
ATOM   2235 HG12 VAL A 834     -14.561  38.730  33.983  1.00  0.00           H
ATOM   2236 HG13 VAL A 834     -13.784  39.938  34.993  1.00  0.00           H
ATOM   2237 HG21 VAL A 834     -13.707  42.060  32.975  1.00  0.00           H
ATOM   2238 HG22 VAL A 834     -12.261  41.672  33.891  1.00  0.00           H
ATOM   2239 HG23 VAL A 834     -12.236  41.712  32.124  1.00  0.00           H
ATOM   2240  N   HIS A 835     -12.411  36.844  33.698  1.00 45.68           N
ATOM   2241  CA  HIS A 835     -12.713  35.475  33.314  1.00 44.53           C
ATOM   2242  C   HIS A 835     -14.143  35.196  32.900  1.00 44.50           C
ATOM   2243  O   HIS A 835     -14.414  34.601  31.901  1.00 44.43           O
ATOM   2244  CB  HIS A 835     -12.318  34.584  34.464  1.00 43.92           C
ATOM   2245  CG  HIS A 835     -12.226  33.143  34.124  1.00 43.06           C
ATOM   2246  ND1 HIS A 835     -13.332  32.372  33.909  1.00 43.14           N
ATOM   2247  CD2 HIS A 835     -11.166  32.321  34.018  1.00 43.22           C
ATOM   2248  CE1 HIS A 835     -12.960  31.138  33.656  1.00 45.16           C
ATOM   2249  NE2 HIS A 835     -11.649  31.080  33.721  1.00 43.50           N
ATOM   2250  H   HIS A 835     -12.357  37.072  34.686  1.00  0.00           H
ATOM   2251  HA  HIS A 835     -12.066  35.198  32.477  1.00  0.00           H
ATOM   2252  HB2 HIS A 835     -11.334  34.881  34.832  1.00  0.00           H
ATOM   2253  HB3 HIS A 835     -12.996  34.695  35.312  1.00  0.00           H
ATOM   2254  HD2 HIS A 835     -10.110  32.517  34.123  1.00  0.00           H
ATOM   2255  HE1 HIS A 835     -13.612  30.305  33.442  1.00  0.00           H
ATOM   2256  HE2 HIS A 835     -11.091  30.257  33.549  1.00  0.00           H
ATOM   2257  N   ARG A 836     -15.072  35.629  33.698  1.00 44.43           N
ATOM   2258  CA  ARG A 836     -16.449  35.521  33.343  1.00 45.43           C
ATOM   2259  C   ARG A 836     -17.034  34.149  33.494  1.00 46.54           C
ATOM   2260  O   ARG A 836     -18.213  33.978  33.338  1.00 46.92           O
ATOM   2261  CB  ARG A 836     -16.620  36.017  31.944  1.00 44.66           C
ATOM   2262  CG  ARG A 836     -16.513  37.479  31.885  1.00 45.60           C
ATOM   2263  CD  ARG A 836     -17.075  38.011  30.635  1.00 46.04           C
ATOM   2264  NE  ARG A 836     -18.358  37.428  30.344  1.00 44.98           N
ATOM   2265  CZ  ARG A 836     -18.811  37.257  29.124  1.00 46.41           C
ATOM   2266  NH1 ARG A 836     -19.982  36.724  28.920  1.00 49.85           N
ATOM   2267  NH2 ARG A 836     -18.077  37.612  28.104  1.00 48.19           N1+
ATOM   2268  H   ARG A 836     -14.828  36.108  34.558  1.00  0.00           H
ATOM   2269  HA  ARG A 836     -17.001  36.152  34.041  1.00  0.00           H
ATOM   2270  HB2 ARG A 836     -16.198  35.538  31.066  1.00  0.00           H
ATOM   2271  HB3 ARG A 836     -17.661  35.759  31.772  1.00  0.00           H
ATOM   2272  HG2 ARG A 836     -17.010  37.953  32.731  1.00  0.00           H
ATOM   2273  HG3 ARG A 836     -15.465  37.772  31.951  1.00  0.00           H
ATOM   2274  HD2 ARG A 836     -17.177  39.095  30.692  1.00  0.00           H
ATOM   2275  HD3 ARG A 836     -16.352  37.811  29.848  1.00  0.00           H
ATOM   2276  HE  ARG A 836     -18.944  37.196  31.134  1.00  0.00           H
ATOM   2277 HH11 ARG A 836     -20.554  36.443  29.704  1.00  0.00           H
ATOM   2278 HH12 ARG A 836     -20.328  36.578  27.983  1.00  0.00           H
ATOM   2279 HH21 ARG A 836     -17.150  37.981  28.260  1.00  0.00           H
ATOM   2280 HH22 ARG A 836     -18.422  37.501  27.163  1.00  0.00           H
ATOM   2281  N   ASP A 837     -16.216  33.170  33.823  1.00 47.93           N
ATOM   2282  CA  ASP A 837     -16.721  31.821  33.984  1.00 48.18           C
ATOM   2283  C   ASP A 837     -16.152  30.992  35.103  1.00 47.44           C
ATOM   2284  O   ASP A 837     -16.139  29.785  35.019  1.00 47.23           O
ATOM   2285  CB  ASP A 837     -16.632  31.036  32.699  1.00 51.51           C
ATOM   2286  CG  ASP A 837     -17.648  29.969  32.640  1.00 54.85           C
ATOM   2287  OD1 ASP A 837     -17.969  29.422  33.684  1.00 54.21           O
ATOM   2288  OD2 ASP A 837     -18.154  29.689  31.566  1.00 58.32           O1-
ATOM   2289  H   ASP A 837     -15.223  33.337  33.922  1.00  0.00           H
ATOM   2290  HA  ASP A 837     -17.768  31.883  34.292  1.00  0.00           H
ATOM   2291  HB2 ASP A 837     -16.806  31.700  31.852  1.00  0.00           H
ATOM   2292  HB3 ASP A 837     -15.642  30.613  32.531  1.00  0.00           H
ATOM   2293  N   LEU A 838     -15.672  31.625  36.148  1.00 46.62           N
ATOM   2294  CA  LEU A 838     -15.085  30.880  37.225  1.00 45.19           C
ATOM   2295  C   LEU A 838     -16.108  29.969  37.828  1.00 45.65           C
ATOM   2296  O   LEU A 838     -17.239  30.337  37.998  1.00 45.78           O
ATOM   2297  CB  LEU A 838     -14.554  31.845  38.264  1.00 43.33           C
ATOM   2298  CG  LEU A 838     -13.790  31.328  39.458  1.00 42.01           C
ATOM   2299  CD1 LEU A 838     -12.600  30.609  39.006  1.00 42.22           C
ATOM   2300  CD2 LEU A 838     -13.395  32.460  40.304  1.00 39.46           C
ATOM   2301  H   LEU A 838     -15.703  32.633  36.195  1.00  0.00           H
ATOM   2302  HA  LEU A 838     -14.263  30.294  36.809  1.00  0.00           H
ATOM   2303  HB2 LEU A 838     -14.137  32.683  37.728  1.00  0.00           H
ATOM   2304  HB3 LEU A 838     -15.432  32.311  38.679  1.00  0.00           H
ATOM   2305  HG  LEU A 838     -14.418  30.663  40.041  1.00  0.00           H
ATOM   2306 HD11 LEU A 838     -11.710  30.798  39.608  1.00  0.00           H
ATOM   2307 HD12 LEU A 838     -12.787  29.548  39.177  1.00  0.00           H
ATOM   2308 HD13 LEU A 838     -12.406  30.630  37.936  1.00  0.00           H
ATOM   2309 HD21 LEU A 838     -12.862  32.085  41.175  1.00  0.00           H
ATOM   2310 HD22 LEU A 838     -12.754  33.247  39.940  1.00  0.00           H
ATOM   2311 HD23 LEU A 838     -14.281  32.990  40.609  1.00  0.00           H
ATOM   2312  N   ALA A 839     -15.687  28.757  38.136  1.00 46.24           N
ATOM   2313  CA  ALA A 839     -16.537  27.787  38.740  1.00 47.21           C
ATOM   2314  C   ALA A 839     -15.584  26.690  38.986  1.00 48.49           C
ATOM   2315  O   ALA A 839     -14.516  26.723  38.481  1.00 48.17           O
ATOM   2316  CB  ALA A 839     -17.571  27.362  37.827  1.00 45.27           C
ATOM   2317  H   ALA A 839     -14.727  28.488  37.970  1.00  0.00           H
ATOM   2318  HA  ALA A 839     -16.953  28.146  39.683  1.00  0.00           H
ATOM   2319  HB1 ALA A 839     -18.095  26.476  38.189  1.00  0.00           H
ATOM   2320  HB2 ALA A 839     -18.341  28.120  37.686  1.00  0.00           H
ATOM   2321  HB3 ALA A 839     -17.174  27.133  36.837  1.00  0.00           H
ATOM   2322  N   ALA A 840     -15.966  25.727  39.791  1.00 49.83           N
ATOM   2323  CA  ALA A 840     -15.135  24.586  40.106  1.00 50.83           C
ATOM   2324  C   ALA A 840     -14.925  23.689  38.923  1.00 51.00           C
ATOM   2325  O   ALA A 840     -13.894  23.105  38.766  1.00 50.78           O
ATOM   2326  CB  ALA A 840     -15.680  23.851  41.242  1.00 51.10           C
ATOM   2327  H   ALA A 840     -16.872  25.775  40.250  1.00  0.00           H
ATOM   2328  HA  ALA A 840     -14.154  24.960  40.409  1.00  0.00           H
ATOM   2329  HB1 ALA A 840     -15.016  23.034  41.528  1.00  0.00           H
ATOM   2330  HB2 ALA A 840     -15.769  24.486  42.124  1.00  0.00           H
ATOM   2331  HB3 ALA A 840     -16.650  23.404  41.026  1.00  0.00           H
ATOM   2332  N   ARG A 841     -15.929  23.596  38.099  1.00 50.50           N
ATOM   2333  CA  ARG A 841     -15.853  22.791  36.929  1.00 51.78           C
ATOM   2334  C   ARG A 841     -14.766  23.357  36.082  1.00 50.76           C
ATOM   2335  O   ARG A 841     -14.193  22.688  35.262  1.00 50.92           O
ATOM   2336  CB  ARG A 841     -17.143  22.911  36.182  1.00 52.62           C
ATOM   2337  CG  ARG A 841     -17.192  24.162  35.446  1.00 55.95           C
ATOM   2338  CD  ARG A 841     -18.476  24.291  34.763  1.00 57.39           C
ATOM   2339  NE  ARG A 841     -19.358  25.181  35.477  1.00 60.30           N
ATOM   2340  CZ  ARG A 841     -19.896  26.247  34.930  1.00 61.28           C
ATOM   2341  NH1 ARG A 841     -19.626  26.538  33.675  1.00 61.66           N
ATOM   2342  NH2 ARG A 841     -20.695  27.010  35.632  1.00 60.14           N1+
ATOM   2343  H   ARG A 841     -16.781  24.102  38.294  1.00  0.00           H
ATOM   2344  HA  ARG A 841     -15.651  21.750  37.187  1.00  0.00           H
ATOM   2345  HB2 ARG A 841     -17.239  22.069  35.495  1.00  0.00           H
ATOM   2346  HB3 ARG A 841     -17.991  22.854  36.863  1.00  0.00           H
ATOM   2347  HG2 ARG A 841     -17.017  25.037  36.072  1.00  0.00           H
ATOM   2348  HG3 ARG A 841     -16.510  24.173  34.600  1.00  0.00           H
ATOM   2349  HD2 ARG A 841     -18.289  24.587  33.732  1.00  0.00           H
ATOM   2350  HD3 ARG A 841     -18.989  23.333  34.663  1.00  0.00           H
ATOM   2351  HE  ARG A 841     -19.576  24.945  36.435  1.00  0.00           H
ATOM   2352 HH11 ARG A 841     -18.989  25.961  33.146  1.00  0.00           H
ATOM   2353 HH12 ARG A 841     -19.953  27.401  33.263  1.00  0.00           H
ATOM   2354 HH21 ARG A 841     -20.903  26.789  36.596  1.00  0.00           H
ATOM   2355 HH22 ARG A 841     -21.065  27.859  35.229  1.00  0.00           H
ATOM   2356  N   ASN A 842     -14.535  24.634  36.252  1.00 49.35           N
ATOM   2357  CA  ASN A 842     -13.564  25.340  35.484  1.00 49.42           C
ATOM   2358  C   ASN A 842     -12.220  25.399  36.119  1.00 49.45           C
ATOM   2359  O   ASN A 842     -11.407  26.194  35.735  1.00 50.63           O
ATOM   2360  CB  ASN A 842     -14.034  26.731  35.159  1.00 48.58           C
ATOM   2361  CG  ASN A 842     -15.023  26.751  34.065  1.00 49.05           C
ATOM   2362  OD1 ASN A 842     -15.212  25.781  33.375  1.00 50.40           O
ATOM   2363  ND2 ASN A 842     -15.676  27.868  33.904  1.00 50.81           N
ATOM   2364  H   ASN A 842     -15.042  25.141  36.963  1.00  0.00           H
ATOM   2365  HA  ASN A 842     -13.357  24.817  34.550  1.00  0.00           H
ATOM   2366  HB2 ASN A 842     -14.455  27.222  36.034  1.00  0.00           H
ATOM   2367  HB3 ASN A 842     -13.237  27.387  34.805  1.00  0.00           H
ATOM   2368 HD21 ASN A 842     -15.600  28.661  34.541  1.00  0.00           H
ATOM   2369 HD22 ASN A 842     -16.375  27.928  33.176  1.00  0.00           H
ATOM   2370  N   VAL A 843     -11.995  24.589  37.127  1.00 47.79           N
ATOM   2371  CA  VAL A 843     -10.686  24.506  37.725  1.00 45.75           C
ATOM   2372  C   VAL A 843     -10.179  23.115  37.488  1.00 46.86           C
ATOM   2373  O   VAL A 843     -10.842  22.179  37.825  1.00 48.65           O
ATOM   2374  CB  VAL A 843     -10.742  24.732  39.174  1.00 44.06           C
ATOM   2375  CG1 VAL A 843      -9.425  24.489  39.735  1.00 42.31           C
ATOM   2376  CG2 VAL A 843     -11.132  26.103  39.427  1.00 40.96           C
ATOM   2377  H   VAL A 843     -12.716  23.956  37.448  1.00  0.00           H
ATOM   2378  HA  VAL A 843      -9.973  25.206  37.291  1.00  0.00           H
ATOM   2379  HB  VAL A 843     -11.470  24.075  39.654  1.00  0.00           H
ATOM   2380 HG11 VAL A 843      -9.372  24.871  40.755  1.00  0.00           H
ATOM   2381 HG12 VAL A 843      -9.162  23.434  39.826  1.00  0.00           H
ATOM   2382 HG13 VAL A 843      -8.628  25.000  39.196  1.00  0.00           H
ATOM   2383 HG21 VAL A 843     -11.166  26.312  40.496  1.00  0.00           H
ATOM   2384 HG22 VAL A 843     -10.441  26.819  38.979  1.00  0.00           H
ATOM   2385 HG23 VAL A 843     -12.125  26.329  39.049  1.00  0.00           H
ATOM   2386  N   LEU A 844      -9.005  22.968  36.904  1.00 45.68           N
ATOM   2387  CA  LEU A 844      -8.510  21.643  36.580  1.00 45.53           C
ATOM   2388  C   LEU A 844      -7.484  21.251  37.581  1.00 46.06           C
ATOM   2389  O   LEU A 844      -6.811  22.096  38.155  1.00 46.02           O
ATOM   2390  CB  LEU A 844      -7.915  21.640  35.182  1.00 45.47           C
ATOM   2391  CG  LEU A 844      -8.921  21.992  34.070  1.00 45.89           C
ATOM   2392  CD1 LEU A 844      -8.205  22.232  32.764  1.00 43.72           C
ATOM   2393  CD2 LEU A 844     -10.019  20.907  33.915  1.00 44.01           C
ATOM   2394  H   LEU A 844      -8.436  23.779  36.686  1.00  0.00           H
ATOM   2395  HA  LEU A 844      -9.272  20.877  36.594  1.00  0.00           H
ATOM   2396  HB2 LEU A 844      -7.088  22.351  35.150  1.00  0.00           H
ATOM   2397  HB3 LEU A 844      -7.613  20.616  34.999  1.00  0.00           H
ATOM   2398  HG  LEU A 844      -9.463  22.878  34.367  1.00  0.00           H
ATOM   2399 HD11 LEU A 844      -8.903  22.256  31.931  1.00  0.00           H
ATOM   2400 HD12 LEU A 844      -7.542  23.089  32.787  1.00  0.00           H
ATOM   2401 HD13 LEU A 844      -7.606  21.364  32.522  1.00  0.00           H
ATOM   2402 HD21 LEU A 844     -10.701  21.179  33.113  1.00  0.00           H
ATOM   2403 HD22 LEU A 844      -9.594  19.930  33.679  1.00  0.00           H
ATOM   2404 HD23 LEU A 844     -10.626  20.809  34.812  1.00  0.00           H
ATOM   2405  N   VAL A 845      -7.349  19.954  37.786  1.00 47.53           N
ATOM   2406  CA  VAL A 845      -6.423  19.439  38.796  1.00 49.09           C
ATOM   2407  C   VAL A 845      -5.222  18.846  38.120  1.00 49.35           C
ATOM   2408  O   VAL A 845      -5.311  17.784  37.533  1.00 48.67           O
ATOM   2409  CB  VAL A 845      -7.107  18.358  39.690  1.00 48.55           C
ATOM   2410  CG1 VAL A 845      -6.210  17.920  40.825  1.00 48.69           C
ATOM   2411  CG2 VAL A 845      -8.394  18.889  40.258  1.00 49.66           C
ATOM   2412  H   VAL A 845      -7.944  19.294  37.300  1.00  0.00           H
ATOM   2413  HA  VAL A 845      -6.058  20.230  39.436  1.00  0.00           H
ATOM   2414  HB  VAL A 845      -7.410  17.511  39.088  1.00  0.00           H
ATOM   2415 HG11 VAL A 845      -6.726  17.224  41.488  1.00  0.00           H
ATOM   2416 HG12 VAL A 845      -5.328  17.396  40.459  1.00  0.00           H
ATOM   2417 HG13 VAL A 845      -5.875  18.764  41.428  1.00  0.00           H
ATOM   2418 HG21 VAL A 845      -8.814  18.227  41.016  1.00  0.00           H
ATOM   2419 HG22 VAL A 845      -8.207  19.859  40.706  1.00  0.00           H
ATOM   2420 HG23 VAL A 845      -9.146  19.016  39.485  1.00  0.00           H
ATOM   2421  N   LYS A 846      -4.098  19.530  38.201  1.00 51.71           N
ATOM   2422  CA  LYS A 846      -2.893  18.973  37.623  1.00 55.33           C
ATOM   2423  C   LYS A 846      -2.497  17.784  38.464  1.00 57.05           C
ATOM   2424  O   LYS A 846      -2.361  16.665  37.953  1.00 58.47           O
ATOM   2425  CB  LYS A 846      -1.761  19.994  37.591  1.00 56.78           C
ATOM   2426  CG  LYS A 846      -0.527  19.507  36.826  1.00 -1.00           C
ATOM   2427  CD  LYS A 846       0.648  20.494  36.820  1.00 -1.00           C
ATOM   2428  CE  LYS A 846       1.894  20.024  36.058  1.00 -1.00           C
ATOM   2429  NZ  LYS A 846       2.991  21.007  36.085  1.00 -1.00           N1+
ATOM   2430  H   LYS A 846      -4.052  20.394  38.723  1.00  0.00           H
ATOM   2431  HA  LYS A 846      -3.075  18.642  36.598  1.00  0.00           H
ATOM   2432  HB2 LYS A 846      -2.108  20.907  37.107  1.00  0.00           H
ATOM   2433  HB3 LYS A 846      -1.447  20.221  38.610  1.00  0.00           H
ATOM   2434  HG2 LYS A 846      -0.162  18.583  37.273  1.00 -1.00           H
ATOM   2435  HG3 LYS A 846      -0.793  19.326  35.784  1.00 -1.00           H
ATOM   2436  HD2 LYS A 846       0.335  21.429  36.356  1.00 -1.00           H
ATOM   2437  HD3 LYS A 846       0.966  20.686  37.845  1.00 -1.00           H
ATOM   2438  HE2 LYS A 846       2.267  19.102  36.504  1.00 -1.00           H
ATOM   2439  HE3 LYS A 846       1.636  19.844  35.015  1.00 -1.00           H
ATOM   2440  HZ1 LYS A 846       3.781  20.645  35.570  1.00 -1.00           H
ATOM   2441  HZ2 LYS A 846       2.680  21.870  35.662  1.00 -1.00           H
ATOM   2442  HZ3 LYS A 846       3.264  21.181  37.042  1.00 -1.00           H
ATOM   2443  N   THR A 847      -2.291  18.052  39.736  1.00 58.13           N
ATOM   2444  CA  THR A 847      -2.000  17.074  40.743  1.00 58.96           C
ATOM   2445  C   THR A 847      -2.817  17.601  41.869  1.00 59.74           C
ATOM   2446  O   THR A 847      -3.033  18.787  41.986  1.00 60.49           O
ATOM   2447  CB  THR A 847      -0.593  17.102  41.184  1.00 58.84           C
ATOM   2448  OG1 THR A 847      -0.523  17.886  42.359  1.00 59.83           O
ATOM   2449  CG2 THR A 847       0.249  17.714  40.162  1.00 58.83           C
ATOM   2450  H   THR A 847      -2.444  18.997  40.064  1.00  0.00           H
ATOM   2451  HA  THR A 847      -2.313  16.089  40.406  1.00  0.00           H
ATOM   2452  HB  THR A 847      -0.245  16.095  41.415  1.00  0.00           H
ATOM   2453  HG1 THR A 847       0.379  17.942  42.655  1.00  0.00           H
ATOM   2454 HG21 THR A 847       1.292  17.654  40.475  1.00  0.00           H
ATOM   2455 HG22 THR A 847       0.197  17.180  39.212  1.00  0.00           H
ATOM   2456 HG23 THR A 847       0.066  18.773  39.984  1.00  0.00           H
ATOM   2457  N   PRO A 848      -3.219  16.734  42.750  1.00 59.45           N
ATOM   2458  CA  PRO A 848      -4.138  17.095  43.801  1.00 58.60           C
ATOM   2459  C   PRO A 848      -3.586  18.231  44.577  1.00 58.02           C
ATOM   2460  O   PRO A 848      -4.307  18.983  45.142  1.00 58.22           O
ATOM   2461  CB  PRO A 848      -4.153  15.852  44.646  1.00 58.43           C
ATOM   2462  CG  PRO A 848      -3.722  14.817  43.764  1.00 59.96           C
ATOM   2463  CD  PRO A 848      -2.683  15.403  42.967  1.00 58.94           C
ATOM   2464  HA  PRO A 848      -5.126  17.319  43.395  1.00  0.00           H
ATOM   2465  HB2 PRO A 848      -3.451  15.905  45.482  1.00  0.00           H
ATOM   2466  HB3 PRO A 848      -5.131  15.690  45.089  1.00  0.00           H
ATOM   2467  HG2 PRO A 848      -3.382  13.930  44.299  1.00  0.00           H
ATOM   2468  HG3 PRO A 848      -4.549  14.509  43.120  1.00  0.00           H
ATOM   2469  HD2 PRO A 848      -1.742  15.463  43.517  1.00  0.00           H
ATOM   2470  HD3 PRO A 848      -2.519  14.806  42.074  1.00  0.00           H
ATOM   2471  N   GLN A 849      -2.296  18.330  44.639  1.00 57.91           N
ATOM   2472  CA  GLN A 849      -1.699  19.409  45.347  1.00 57.42           C
ATOM   2473  C   GLN A 849      -1.656  20.673  44.511  1.00 55.94           C
ATOM   2474  O   GLN A 849      -1.340  21.714  45.017  1.00 54.79           O
ATOM   2475  CB  GLN A 849      -0.295  18.978  45.751  1.00 60.47           C
ATOM   2476  CG  GLN A 849      -0.053  17.495  45.606  1.00 64.71           C
ATOM   2477  CD  GLN A 849       1.092  17.154  44.675  1.00 68.40           C
ATOM   2478  OE1 GLN A 849       1.486  18.100  43.853  1.00 69.66           O
ATOM   2479  NE2 GLN A 849       1.616  16.048  44.700  1.00 68.09           N
ATOM   2480  H   GLN A 849      -1.703  17.699  44.118  1.00  0.00           H
ATOM   2481  HA  GLN A 849      -2.246  19.632  46.267  1.00  0.00           H
ATOM   2482  HB2 GLN A 849       0.473  19.613  45.307  1.00  0.00           H
ATOM   2483  HB3 GLN A 849      -0.198  19.219  46.811  1.00  0.00           H
ATOM   2484  HG2 GLN A 849       0.338  17.200  46.582  1.00  0.00           H
ATOM   2485  HG3 GLN A 849      -0.866  16.776  45.518  1.00  0.00           H
ATOM   2486 HE21 GLN A 849       1.291  15.347  45.350  1.00  0.00           H
ATOM   2487 HE22 GLN A 849       2.384  15.847  44.076  1.00  0.00           H
ATOM   2488  N   HIS A 850      -1.944  20.568  43.223  1.00 54.49           N
ATOM   2489  CA  HIS A 850      -1.835  21.699  42.307  1.00 52.30           C
ATOM   2490  C   HIS A 850      -3.049  21.890  41.439  1.00 51.13           C
ATOM   2491  O   HIS A 850      -3.468  20.955  40.833  1.00 52.08           O
ATOM   2492  CB  HIS A 850      -0.675  21.420  41.387  1.00 53.00           C
ATOM   2493  CG  HIS A 850      -0.258  22.585  40.561  1.00 55.06           C
ATOM   2494  ND1 HIS A 850       0.890  23.295  40.808  1.00 56.53           N
ATOM   2495  CD2 HIS A 850      -0.820  23.153  39.477  1.00 56.71           C
ATOM   2496  CE1 HIS A 850       1.010  24.259  39.922  1.00 56.78           C
ATOM   2497  NE2 HIS A 850      -0.014  24.194  39.101  1.00 57.08           N
ATOM   2498  H   HIS A 850      -2.255  19.681  42.836  1.00  0.00           H
ATOM   2499  HA  HIS A 850      -1.637  22.636  42.829  1.00  0.00           H
ATOM   2500  HB2 HIS A 850       0.193  21.105  41.970  1.00  0.00           H
ATOM   2501  HB3 HIS A 850      -0.895  20.586  40.724  1.00  0.00           H
ATOM   2502  HD2 HIS A 850      -1.727  22.913  38.944  1.00  0.00           H
ATOM   2503  HE1 HIS A 850       1.808  24.986  39.881  1.00  0.00           H
ATOM   2504  HE2 HIS A 850      -0.191  24.845  38.348  1.00  0.00           H
ATOM   2505  N   VAL A 851      -3.607  23.087  41.338  1.00 49.02           N
ATOM   2506  CA  VAL A 851      -4.739  23.272  40.449  1.00 46.69           C
ATOM   2507  C   VAL A 851      -4.575  24.468  39.537  1.00 46.32           C
ATOM   2508  O   VAL A 851      -3.690  25.285  39.743  1.00 46.23           O
ATOM   2509  CB  VAL A 851      -6.029  23.308  41.214  1.00 45.89           C
ATOM   2510  CG1 VAL A 851      -6.232  21.979  41.878  1.00 44.39           C
ATOM   2511  CG2 VAL A 851      -6.013  24.402  42.219  1.00 45.30           C
ATOM   2512  H   VAL A 851      -3.257  23.872  41.870  1.00  0.00           H
ATOM   2513  HA  VAL A 851      -4.819  22.460  39.725  1.00  0.00           H
ATOM   2514  HB  VAL A 851      -6.859  23.471  40.527  1.00  0.00           H
ATOM   2515 HG11 VAL A 851      -7.237  21.919  42.293  1.00  0.00           H
ATOM   2516 HG12 VAL A 851      -6.122  21.137  41.216  1.00  0.00           H
ATOM   2517 HG13 VAL A 851      -5.554  21.822  42.717  1.00  0.00           H
ATOM   2518 HG21 VAL A 851      -6.983  24.468  42.714  1.00  0.00           H
ATOM   2519 HG22 VAL A 851      -5.281  24.240  43.008  1.00  0.00           H
ATOM   2520 HG23 VAL A 851      -5.827  25.383  41.781  1.00  0.00           H
ATOM   2521  N   LYS A 852      -5.391  24.542  38.494  1.00 46.39           N
ATOM   2522  CA  LYS A 852      -5.318  25.648  37.552  1.00 46.44           C
ATOM   2523  C   LYS A 852      -6.671  26.027  37.031  1.00 46.59           C
ATOM   2524  O   LYS A 852      -7.532  25.174  36.888  1.00 45.36           O
ATOM   2525  CB  LYS A 852      -4.427  25.289  36.383  1.00 46.56           C
ATOM   2526  CG  LYS A 852      -3.039  24.901  36.794  1.00 48.06           C
ATOM   2527  CD  LYS A 852      -2.176  24.751  35.594  1.00 49.64           C
ATOM   2528  CE  LYS A 852      -0.828  24.175  35.965  1.00 48.41           C
ATOM   2529  NZ  LYS A 852       0.069  24.337  34.811  1.00 50.74           N1+
ATOM   2530  H   LYS A 852      -6.088  23.822  38.343  1.00  0.00           H
ATOM   2531  HA  LYS A 852      -4.919  26.519  38.065  1.00  0.00           H
ATOM   2532  HB2 LYS A 852      -4.881  24.480  35.810  1.00  0.00           H
ATOM   2533  HB3 LYS A 852      -4.371  26.143  35.705  1.00  0.00           H
ATOM   2534  HG2 LYS A 852      -2.598  25.614  37.474  1.00  0.00           H
ATOM   2535  HG3 LYS A 852      -3.065  23.941  37.308  1.00  0.00           H
ATOM   2536  HD2 LYS A 852      -2.638  24.233  34.762  1.00  0.00           H
ATOM   2537  HD3 LYS A 852      -2.014  25.758  35.205  1.00  0.00           H
ATOM   2538  HE2 LYS A 852      -0.346  24.685  36.769  1.00  0.00           H
ATOM   2539  HE3 LYS A 852      -0.876  23.129  36.260  1.00  0.00           H
ATOM   2540  HZ1 LYS A 852       0.984  23.924  35.010  1.00  0.00           H
ATOM   2541  HZ2 LYS A 852      -0.326  23.877  34.005  1.00  0.00           H
ATOM   2542  HZ3 LYS A 852       0.193  25.319  34.614  1.00  0.00           H
ATOM   2543  N   ILE A 853      -6.833  27.325  36.764  1.00 48.02           N
ATOM   2544  CA  ILE A 853      -8.050  27.904  36.186  1.00 49.31           C
ATOM   2545  C   ILE A 853      -8.041  27.577  34.718  1.00 50.49           C
ATOM   2546  O   ILE A 853      -6.989  27.599  34.092  1.00 49.66           O
ATOM   2547  CB  ILE A 853      -8.008  29.403  36.292  1.00 48.91           C
ATOM   2548  CG1 ILE A 853      -7.941  29.811  37.755  1.00 49.82           C
ATOM   2549  CG2 ILE A 853      -9.215  30.010  35.648  1.00 49.38           C
ATOM   2550  CD1 ILE A 853      -7.697  31.307  37.939  1.00 51.55           C
ATOM   2551  H   ILE A 853      -6.058  27.953  36.938  1.00  0.00           H
ATOM   2552  HA  ILE A 853      -8.937  27.495  36.677  1.00  0.00           H
ATOM   2553  HB  ILE A 853      -7.116  29.787  35.792  1.00  0.00           H
ATOM   2554 HG12 ILE A 853      -8.856  29.522  38.274  1.00  0.00           H
ATOM   2555 HG13 ILE A 853      -7.131  29.300  38.274  1.00  0.00           H
ATOM   2556 HG21 ILE A 853      -9.283  31.080  35.826  1.00  0.00           H
ATOM   2557 HG22 ILE A 853      -9.205  29.926  34.562  1.00  0.00           H
ATOM   2558 HG23 ILE A 853     -10.141  29.567  36.018  1.00  0.00           H
ATOM   2559 HD11 ILE A 853      -7.544  31.452  39.002  1.00  0.00           H
ATOM   2560 HD12 ILE A 853      -6.816  31.636  37.393  1.00  0.00           H
ATOM   2561 HD13 ILE A 853      -8.534  31.927  37.633  1.00  0.00           H
ATOM   2562  N   THR A 854      -9.205  27.289  34.153  1.00 52.99           N
ATOM   2563  CA  THR A 854      -9.184  26.651  32.847  1.00 56.23           C
ATOM   2564  C   THR A 854      -9.946  27.260  31.724  1.00 59.02           C
ATOM   2565  O   THR A 854      -9.560  27.049  30.578  1.00 61.81           O
ATOM   2566  CB  THR A 854      -9.597  25.146  32.877  1.00 56.53           C
ATOM   2567  OG1 THR A 854      -9.198  24.529  31.644  1.00 56.03           O
ATOM   2568  CG2 THR A 854     -11.109  24.988  32.983  1.00 56.77           C
ATOM   2569  H   THR A 854     -10.053  27.256  34.704  1.00  0.00           H
ATOM   2570  HA  THR A 854      -8.175  26.626  32.433  1.00  0.00           H
ATOM   2571  HB  THR A 854      -9.065  24.725  33.721  1.00  0.00           H
ATOM   2572  HG1 THR A 854      -9.579  25.016  30.927  1.00  0.00           H
ATOM   2573 HG21 THR A 854     -11.364  24.088  33.541  1.00  0.00           H
ATOM   2574 HG22 THR A 854     -11.608  25.837  33.431  1.00  0.00           H
ATOM   2575 HG23 THR A 854     -11.573  24.881  32.001  1.00  0.00           H
ATOM   2576  N   ASP A 855     -11.040  27.953  31.985  1.00 61.70           N
ATOM   2577  CA  ASP A 855     -11.899  28.233  30.829  1.00 64.54           C
ATOM   2578  C   ASP A 855     -11.853  29.630  30.258  1.00 64.51           C
ATOM   2579  O   ASP A 855     -12.099  30.613  30.954  1.00 65.87           O
ATOM   2580  CB  ASP A 855     -13.329  27.805  31.059  1.00 65.97           C
ATOM   2581  CG  ASP A 855     -14.015  27.509  29.778  1.00 68.59           C
ATOM   2582  OD1 ASP A 855     -13.314  26.934  28.901  1.00 69.74           O
ATOM   2583  OD2 ASP A 855     -15.219  27.866  29.630  1.00 70.93           O1-
ATOM   2584  H   ASP A 855     -11.373  28.105  32.925  1.00  0.00           H
ATOM   2585  HA  ASP A 855     -11.557  27.640  29.994  1.00  0.00           H
ATOM   2586  HB2 ASP A 855     -13.346  26.882  31.638  1.00  0.00           H
ATOM   2587  HB3 ASP A 855     -13.886  28.546  31.635  1.00  0.00           H
ATOM   2588  N   PHE A 856     -11.574  29.722  28.971  1.00 63.35           N
ATOM   2589  CA  PHE A 856     -11.408  31.034  28.401  1.00 63.30           C
ATOM   2590  C   PHE A 856     -12.369  31.373  27.296  1.00 63.16           C
ATOM   2591  O   PHE A 856     -12.319  32.461  26.723  1.00 62.21           O
ATOM   2592  CB  PHE A 856      -9.967  31.224  27.995  1.00 63.58           C
ATOM   2593  CG  PHE A 856      -9.051  31.236  29.156  1.00 64.19           C
ATOM   2594  CD1 PHE A 856      -8.981  32.348  29.968  1.00 64.43           C
ATOM   2595  CD2 PHE A 856      -8.279  30.132  29.463  1.00 64.93           C
ATOM   2596  CE1 PHE A 856      -8.135  32.366  31.064  1.00 66.00           C
ATOM   2597  CE2 PHE A 856      -7.426  30.146  30.558  1.00 65.10           C
ATOM   2598  CZ  PHE A 856      -7.363  31.258  31.361  1.00 65.04           C
ATOM   2599  H   PHE A 856     -11.399  28.898  28.413  1.00  0.00           H
ATOM   2600  HA  PHE A 856     -11.614  31.849  29.096  1.00  0.00           H
ATOM   2601  HB2 PHE A 856      -9.666  30.440  27.297  1.00  0.00           H
ATOM   2602  HB3 PHE A 856      -9.829  32.165  27.459  1.00  0.00           H
ATOM   2603  HD1 PHE A 856      -9.556  33.225  29.742  1.00  0.00           H
ATOM   2604  HD2 PHE A 856      -8.335  29.244  28.850  1.00  0.00           H
ATOM   2605  HE1 PHE A 856      -8.093  33.239  31.699  1.00  0.00           H
ATOM   2606  HE2 PHE A 856      -6.838  29.272  30.797  1.00  0.00           H
ATOM   2607  HZ  PHE A 856      -6.795  31.297  32.255  1.00  0.00           H
ATOM   2608  N   GLY A 857     -13.263  30.435  27.028  1.00 63.34           N
ATOM   2609  CA  GLY A 857     -14.311  30.651  26.057  1.00 65.86           C
ATOM   2610  C   GLY A 857     -14.965  32.025  26.189  1.00 67.27           C
ATOM   2611  O   GLY A 857     -15.326  32.649  25.185  1.00 68.33           O
ATOM   2612  H   GLY A 857     -13.251  29.566  27.543  1.00  0.00           H
ATOM   2613  HA2 GLY A 857     -13.920  30.539  25.049  1.00  0.00           H
ATOM   2614  HA3 GLY A 857     -15.074  29.884  26.189  1.00  0.00           H
ATOM   2615  N   LEU A 858     -15.098  32.515  27.416  1.00 67.27           N
ATOM   2616  CA  LEU A 858     -15.778  33.777  27.637  1.00 67.45           C
ATOM   2617  C   LEU A 858     -14.868  34.886  28.114  1.00 67.87           C
ATOM   2618  O   LEU A 858     -15.336  35.995  28.387  1.00 68.00           O
ATOM   2619  CB  LEU A 858     -16.911  33.602  28.644  1.00 67.35           C
ATOM   2620  CG  LEU A 858     -18.047  32.649  28.279  1.00 67.83           C
ATOM   2621  CD1 LEU A 858     -19.010  32.565  29.447  1.00 67.72           C
ATOM   2622  CD2 LEU A 858     -18.775  33.095  27.006  1.00 69.06           C
ATOM   2623  H   LEU A 858     -14.783  31.980  28.212  1.00  0.00           H
ATOM   2624  HA  LEU A 858     -16.227  34.181  26.730  1.00  0.00           H
ATOM   2625  HB2 LEU A 858     -16.477  33.272  29.591  1.00  0.00           H
ATOM   2626  HB3 LEU A 858     -17.365  34.571  28.862  1.00  0.00           H
ATOM   2627  HG  LEU A 858     -17.637  31.652  28.112  1.00  0.00           H
ATOM   2628 HD11 LEU A 858     -19.818  31.863  29.241  1.00  0.00           H
ATOM   2629 HD12 LEU A 858     -18.511  32.222  30.353  1.00  0.00           H
ATOM   2630 HD13 LEU A 858     -19.462  33.533  29.666  1.00  0.00           H
ATOM   2631 HD21 LEU A 858     -19.629  32.449  26.800  1.00  0.00           H
ATOM   2632 HD22 LEU A 858     -19.146  34.116  27.096  1.00  0.00           H
ATOM   2633 HD23 LEU A 858     -18.125  33.048  26.133  1.00  0.00           H
ATOM   2634  N   ALA A 859     -13.580  34.600  28.226  1.00 68.11           N
ATOM   2635  CA  ALA A 859     -12.668  35.604  28.737  1.00 69.07           C
ATOM   2636  C   ALA A 859     -12.620  36.858  27.867  1.00 69.64           C
ATOM   2637  O   ALA A 859     -12.587  36.787  26.637  1.00 69.33           O
ATOM   2638  CB  ALA A 859     -11.290  35.024  28.917  1.00 68.86           C
ATOM   2639  H   ALA A 859     -13.223  33.698  27.938  1.00  0.00           H
ATOM   2640  HA  ALA A 859     -13.029  35.887  29.727  1.00  0.00           H
ATOM   2641  HB1 ALA A 859     -10.582  35.765  29.291  1.00  0.00           H
ATOM   2642  HB2 ALA A 859     -11.357  34.230  29.658  1.00  0.00           H
ATOM   2643  HB3 ALA A 859     -10.893  34.605  27.991  1.00  0.00           H
ATOM   2644  N   LYS A 860     -12.561  38.008  28.502  1.00 70.60           N
ATOM   2645  CA  LYS A 860     -12.427  39.245  27.775  1.00 72.41           C
ATOM   2646  C   LYS A 860     -11.316  40.091  28.337  1.00 73.23           C
ATOM   2647  O   LYS A 860     -11.161  40.196  29.516  1.00 73.91           O
ATOM   2648  CB  LYS A 860     -13.728  40.004  27.796  1.00 73.29           C
ATOM   2649  CG  LYS A 860     -14.850  39.242  27.178  1.00 74.93           C
ATOM   2650  CD  LYS A 860     -14.566  38.978  25.748  1.00 75.38           C
ATOM   2651  CE  LYS A 860     -15.795  39.158  24.931  1.00 76.11           C
ATOM   2652  NZ  LYS A 860     -16.326  37.862  24.505  1.00 77.60           N1+
ATOM   2653  H   LYS A 860     -12.558  38.032  29.513  1.00  0.00           H
ATOM   2654  HA  LYS A 860     -12.138  39.079  26.736  1.00  0.00           H
ATOM   2655  HB2 LYS A 860     -13.996  40.242  28.828  1.00  0.00           H
ATOM   2656  HB3 LYS A 860     -13.616  40.967  27.294  1.00  0.00           H
ATOM   2657  HG2 LYS A 860     -15.074  38.325  27.711  1.00  0.00           H
ATOM   2658  HG3 LYS A 860     -15.720  39.874  27.340  1.00  0.00           H
ATOM   2659  HD2 LYS A 860     -13.832  39.684  25.356  1.00  0.00           H
ATOM   2660  HD3 LYS A 860     -14.166  37.994  25.554  1.00  0.00           H
ATOM   2661  HE2 LYS A 860     -16.607  39.440  25.568  1.00  0.00           H
ATOM   2662  HE3 LYS A 860     -15.683  39.853  24.098  1.00  0.00           H
ATOM   2663  HZ1 LYS A 860     -17.212  37.995  24.038  1.00  0.00           H
ATOM   2664  HZ2 LYS A 860     -15.673  37.426  23.869  1.00  0.00           H
ATOM   2665  HZ3 LYS A 860     -16.450  37.265  25.310  1.00  0.00           H
ATOM   2666  N   LEU A 861     -10.549  40.695  27.455  1.00 74.81           N
ATOM   2667  CA  LEU A 861      -9.438  41.557  27.786  1.00 76.75           C
ATOM   2668  C   LEU A 861      -9.944  42.975  27.810  1.00 78.32           C
ATOM   2669  O   LEU A 861     -10.782  43.348  27.008  1.00 78.45           O
ATOM   2670  CB  LEU A 861      -8.337  41.419  26.767  1.00 76.77           C
ATOM   2671  CG  LEU A 861      -7.244  42.419  27.022  1.00 76.36           C
ATOM   2672  CD1 LEU A 861      -7.300  42.736  28.465  1.00 75.58           C
ATOM   2673  CD2 LEU A 861      -5.949  41.823  26.646  1.00 75.56           C
ATOM   2674  H   LEU A 861     -10.756  40.573  26.474  1.00  0.00           H
ATOM   2675  HA  LEU A 861      -9.237  41.364  28.820  1.00  0.00           H
ATOM   2676  HB2 LEU A 861      -7.971  40.393  26.758  1.00  0.00           H
ATOM   2677  HB3 LEU A 861      -8.728  41.578  25.760  1.00  0.00           H
ATOM   2678  HG  LEU A 861      -7.415  43.328  26.443  1.00  0.00           H
ATOM   2679 HD11 LEU A 861      -7.181  43.789  28.729  1.00  0.00           H
ATOM   2680 HD12 LEU A 861      -7.481  42.028  29.227  1.00  0.00           H
ATOM   2681 HD13 LEU A 861      -6.250  42.644  28.742  1.00  0.00           H
ATOM   2682 HD21 LEU A 861      -5.136  42.540  26.770  1.00  0.00           H
ATOM   2683 HD22 LEU A 861      -5.686  40.932  27.214  1.00  0.00           H
ATOM   2684 HD23 LEU A 861      -5.950  41.539  25.593  1.00  0.00           H
ATOM   2685  N   LEU A 862      -9.439  43.766  28.745  1.00 80.03           N
ATOM   2686  CA  LEU A 862      -9.930  45.124  28.954  1.00 81.49           C
ATOM   2687  C   LEU A 862      -9.063  46.292  28.520  1.00 83.06           C
ATOM   2688  O   LEU A 862      -7.852  46.278  28.646  1.00 83.24           O
ATOM   2689  CB  LEU A 862     -10.336  45.316  30.411  1.00 80.90           C
ATOM   2690  CG  LEU A 862     -11.502  44.477  30.906  1.00 79.34           C
ATOM   2691  CD1 LEU A 862     -11.690  44.710  32.353  1.00 78.42           C
ATOM   2692  CD2 LEU A 862     -12.749  44.792  30.173  1.00 75.99           C
ATOM   2693  H   LEU A 862      -8.754  43.399  29.393  1.00  0.00           H
ATOM   2694  HA  LEU A 862     -10.853  45.260  28.389  1.00  0.00           H
ATOM   2695  HB2 LEU A 862      -9.467  45.117  31.039  1.00  0.00           H
ATOM   2696  HB3 LEU A 862     -10.576  46.366  30.592  1.00  0.00           H
ATOM   2697  HG  LEU A 862     -11.274  43.420  30.765  1.00  0.00           H
ATOM   2698 HD11 LEU A 862     -12.538  44.154  32.751  1.00  0.00           H
ATOM   2699 HD12 LEU A 862     -10.810  44.402  32.920  1.00  0.00           H
ATOM   2700 HD13 LEU A 862     -11.870  45.764  32.569  1.00  0.00           H
ATOM   2701 HD21 LEU A 862     -13.602  44.410  30.722  1.00  0.00           H
ATOM   2702 HD22 LEU A 862     -12.900  45.867  30.066  1.00  0.00           H
ATOM   2703 HD23 LEU A 862     -12.768  44.345  29.179  1.00  0.00           H
ATOM   2704  N   GLY A 863      -9.742  47.301  27.996  1.00 85.41           N
ATOM   2705  CA  GLY A 863      -9.140  48.524  27.532  1.00 88.72           C
ATOM   2706  C   GLY A 863      -8.618  49.323  28.691  1.00 90.50           C
ATOM   2707  O   GLY A 863      -9.179  49.286  29.761  1.00 90.88           O
ATOM   2708  H   GLY A 863     -10.748  47.228  27.932  1.00  0.00           H
ATOM   2709  HA2 GLY A 863      -8.277  48.235  26.927  1.00  0.00           H
ATOM   2710  HA3 GLY A 863      -9.738  49.078  26.814  1.00  0.00           H
ATOM   2711  N   ALA A 864      -7.567  50.086  28.443  1.00 91.89           N
ATOM   2712  CA  ALA A 864      -6.891  50.873  29.453  1.00 92.91           C
ATOM   2713  C   ALA A 864      -7.859  51.832  30.067  1.00 93.55           C
ATOM   2714  O   ALA A 864      -7.744  52.190  31.219  1.00 93.10           O
ATOM   2715  CB  ALA A 864      -5.773  51.611  28.839  1.00 93.05           C
ATOM   2716  H   ALA A 864      -7.170  50.078  27.515  1.00  0.00           H
ATOM   2717  HA  ALA A 864      -6.509  50.205  30.228  1.00  0.00           H
ATOM   2718  HB1 ALA A 864      -5.237  52.209  29.578  1.00  0.00           H
ATOM   2719  HB2 ALA A 864      -5.049  50.925  28.399  1.00  0.00           H
ATOM   2720  HB3 ALA A 864      -6.108  52.284  28.048  1.00  0.00           H
ATOM   2721  N   GLU A 865      -8.809  52.262  29.266  1.00 94.71           N
ATOM   2722  CA  GLU A 865      -9.843  53.163  29.723  1.00 96.27           C
ATOM   2723  C   GLU A 865     -11.026  52.386  30.249  1.00 95.79           C
ATOM   2724  O   GLU A 865     -12.027  52.972  30.619  1.00 95.80           O
ATOM   2725  CB  GLU A 865     -10.322  54.041  28.574  1.00 98.79           C
ATOM   2726  CG  GLU A 865     -11.427  55.060  28.897  1.00 -1.00           C
ATOM   2727  CD  GLU A 865     -11.899  55.933  27.738  1.00 -1.00           C
ATOM   2728  OE1 GLU A 865     -12.849  55.514  27.040  1.00 -1.00           O
ATOM   2729  OE2 GLU A 865     -11.298  57.016  27.574  1.00 -1.00           O1-
ATOM   2730  H   GLU A 865      -8.844  51.930  28.313  1.00  0.00           H
ATOM   2731  HA  GLU A 865      -9.481  53.820  30.517  1.00  0.00           H
ATOM   2732  HB2 GLU A 865      -9.486  54.624  28.189  1.00  0.00           H
ATOM   2733  HB3 GLU A 865     -10.723  53.413  27.779  1.00  0.00           H
ATOM   2734  HG2 GLU A 865     -12.312  54.535  29.256  1.00 -1.00           H
ATOM   2735  HG3 GLU A 865     -11.075  55.747  29.666  1.00 -1.00           H
ATOM   2736  N   GLU A 866     -10.934  51.069  30.260  1.00 94.60           N
ATOM   2737  CA  GLU A 866     -12.065  50.284  30.698  1.00 93.26           C
ATOM   2738  C   GLU A 866     -11.931  49.609  32.038  1.00 91.95           C
ATOM   2739  O   GLU A 866     -10.935  48.984  32.339  1.00 91.80           O
ATOM   2740  CB  GLU A 866     -12.371  49.223  29.676  1.00 94.02           C
ATOM   2741  CG  GLU A 866     -12.228  49.675  28.289  1.00 95.94           C
ATOM   2742  CD  GLU A 866     -13.207  48.979  27.422  1.00 97.91           C
ATOM   2743  OE1 GLU A 866     -13.405  49.406  26.270  1.00 99.02           O
ATOM   2744  OE2 GLU A 866     -13.794  47.992  27.904  1.00 98.42           O1-
ATOM   2745  H   GLU A 866     -10.089  50.588  29.974  1.00  0.00           H
ATOM   2746  HA  GLU A 866     -12.984  50.876  30.727  1.00  0.00           H
ATOM   2747  HB2 GLU A 866     -11.728  48.351  29.807  1.00  0.00           H
ATOM   2748  HB3 GLU A 866     -13.375  48.891  29.952  1.00  0.00           H
ATOM   2749  HG2 GLU A 866     -12.555  50.715  28.232  1.00  0.00           H
ATOM   2750  HG3 GLU A 866     -11.235  49.704  27.915  1.00  0.00           H
ATOM   2751  N   LYS A 867     -12.955  49.773  32.849  1.00 91.50           N
ATOM   2752  CA  LYS A 867     -13.019  49.139  34.129  1.00 91.44           C
ATOM   2753  C   LYS A 867     -14.205  48.196  34.111  1.00 91.46           C
ATOM   2754  O   LYS A 867     -14.548  47.606  35.105  1.00 91.42           O
ATOM   2755  CB  LYS A 867     -13.180  50.183  35.215  1.00 91.51           C
ATOM   2756  CG  LYS A 867     -12.877  51.604  34.759  1.00 91.69           C
ATOM   2757  CD  LYS A 867     -12.469  52.502  35.917  1.00 90.76           C
ATOM   2758  CE  LYS A 867     -12.846  53.945  35.680  1.00 89.57           C
ATOM   2759  NZ  LYS A 867     -13.399  54.583  36.899  1.00 88.20           N1+
ATOM   2760  H   LYS A 867     -13.741  50.333  32.553  1.00  0.00           H
ATOM   2761  HA  LYS A 867     -12.140  48.533  34.358  1.00  0.00           H
ATOM   2762  HB2 LYS A 867     -14.180  50.180  35.654  1.00  0.00           H
ATOM   2763  HB3 LYS A 867     -12.509  49.911  36.032  1.00  0.00           H
ATOM   2764  HG2 LYS A 867     -12.034  51.661  34.069  1.00  0.00           H
ATOM   2765  HG3 LYS A 867     -13.750  51.987  34.229  1.00  0.00           H
ATOM   2766  HD2 LYS A 867     -12.991  52.152  36.810  1.00  0.00           H
ATOM   2767  HD3 LYS A 867     -11.406  52.402  36.140  1.00  0.00           H
ATOM   2768  HE2 LYS A 867     -11.980  54.509  35.331  1.00  0.00           H
ATOM   2769  HE3 LYS A 867     -13.609  54.046  34.908  1.00  0.00           H
ATOM   2770  HZ1 LYS A 867     -13.638  55.544  36.699  1.00  0.00           H
ATOM   2771  HZ2 LYS A 867     -14.228  54.086  37.193  1.00  0.00           H
ATOM   2772  HZ3 LYS A 867     -12.711  54.555  37.638  1.00  0.00           H
ATOM   2773  N   GLU A 868     -14.868  48.093  32.973  1.00 91.36           N
ATOM   2774  CA  GLU A 868     -16.036  47.238  32.851  1.00 91.35           C
ATOM   2775  C   GLU A 868     -16.126  46.567  31.493  1.00 90.90           C
ATOM   2776  O   GLU A 868     -15.571  47.042  30.521  1.00 90.79           O
ATOM   2777  CB  GLU A 868     -17.322  48.027  33.098  1.00 91.47           C
ATOM   2778  CG  GLU A 868     -17.264  49.499  32.722  1.00 94.31           C
ATOM   2779  CD  GLU A 868     -18.404  49.949  31.818  1.00 97.36           C
ATOM   2780  OE1 GLU A 868     -19.561  50.020  32.276  1.00 98.95           O
ATOM   2781  OE2 GLU A 868     -18.141  50.249  30.642  1.00 97.02           O1-
ATOM   2782  H   GLU A 868     -14.552  48.587  32.151  1.00  0.00           H
ATOM   2783  HA  GLU A 868     -15.970  46.393  33.520  1.00  0.00           H
ATOM   2784  HB2 GLU A 868     -18.185  47.533  32.645  1.00  0.00           H
ATOM   2785  HB3 GLU A 868     -17.529  47.979  34.168  1.00  0.00           H
ATOM   2786  HG2 GLU A 868     -17.277  50.112  33.624  1.00  0.00           H
ATOM   2787  HG3 GLU A 868     -16.361  49.787  32.186  1.00  0.00           H
ATOM   2788  N   TYR A 869     -16.842  45.459  31.428  1.00 90.48           N
ATOM   2789  CA  TYR A 869     -17.096  44.807  30.170  1.00 89.87           C
ATOM   2790  C   TYR A 869     -18.573  44.627  30.034  1.00 90.00           C
ATOM   2791  O   TYR A 869     -19.236  44.257  30.972  1.00 90.02           O
ATOM   2792  CB  TYR A 869     -16.435  43.457  30.067  1.00 89.54           C
ATOM   2793  CG  TYR A 869     -16.811  42.827  28.769  1.00 88.97           C
ATOM   2794  CD1 TYR A 869     -16.182  43.185  27.598  1.00 87.80           C
ATOM   2795  CD2 TYR A 869     -17.842  41.934  28.691  1.00 87.87           C
ATOM   2796  CE1 TYR A 869     -16.543  42.642  26.419  1.00 86.13           C
ATOM   2797  CE2 TYR A 869     -18.200  41.391  27.504  1.00 86.69           C
ATOM   2798  CZ  TYR A 869     -17.550  41.746  26.384  1.00 85.82           C
ATOM   2799  OH  TYR A 869     -17.928  41.187  25.213  1.00 85.98           O
ATOM   2800  H   TYR A 869     -17.264  45.077  32.264  1.00  0.00           H
ATOM   2801  HA  TYR A 869     -16.766  45.406  29.318  1.00  0.00           H
ATOM   2802  HB2 TYR A 869     -15.357  43.545  30.089  1.00  0.00           H
ATOM   2803  HB3 TYR A 869     -16.699  42.814  30.901  1.00  0.00           H
ATOM   2804  HD1 TYR A 869     -15.380  43.909  27.621  1.00  0.00           H
ATOM   2805  HD2 TYR A 869     -18.377  41.645  29.584  1.00  0.00           H
ATOM   2806  HE1 TYR A 869     -16.029  42.930  25.514  1.00  0.00           H
ATOM   2807  HE2 TYR A 869     -19.004  40.674  27.461  1.00  0.00           H
ATOM   2808  HH  TYR A 869     -17.586  41.648  24.462  1.00  0.00           H
ATOM   2809  N   HIS A 870     -19.099  44.894  28.859  1.00 90.06           N
ATOM   2810  CA  HIS A 870     -20.516  44.768  28.656  1.00 90.57           C
ATOM   2811  C   HIS A 870     -20.736  43.757  27.574  1.00 90.41           C
ATOM   2812  O   HIS A 870     -20.017  43.731  26.608  1.00 90.18           O
ATOM   2813  CB  HIS A 870     -21.116  46.117  28.304  1.00 91.88           C
ATOM   2814  CG  HIS A 870     -22.594  46.089  28.125  1.00 94.35           C
ATOM   2815  ND1 HIS A 870     -23.563  45.448  28.812  1.00 95.38           N
ATOM   2816  CD2 HIS A 870     -23.231  46.774  27.120  1.00 95.02           C
ATOM   2817  CE1 HIS A 870     -24.758  45.764  28.223  1.00 95.19           C
ATOM   2818  NE2 HIS A 870     -24.530  46.565  27.202  1.00 94.70           N
ATOM   2819  H   HIS A 870     -18.518  45.182  28.084  1.00  0.00           H
ATOM   2820  HA  HIS A 870     -21.045  44.431  29.540  1.00  0.00           H
ATOM   2821  HB2 HIS A 870     -20.903  46.824  29.107  1.00  0.00           H
ATOM   2822  HB3 HIS A 870     -20.648  46.525  27.406  1.00  0.00           H
ATOM   2823  HD1 HIS A 870     -23.440  44.866  29.630  1.00  0.00           H
ATOM   2824  HD2 HIS A 870     -22.815  47.404  26.348  1.00  0.00           H
ATOM   2825  HE1 HIS A 870     -25.728  45.414  28.545  1.00  0.00           H
ATOM   2826  N   ALA A 871     -21.726  42.904  27.761  1.00 90.72           N
ATOM   2827  CA  ALA A 871     -22.004  41.802  26.825  1.00 91.15           C
ATOM   2828  C   ALA A 871     -23.401  41.863  26.242  1.00 92.02           C
ATOM   2829  O   ALA A 871     -24.387  41.844  26.969  1.00 91.84           O
ATOM   2830  CB  ALA A 871     -21.779  40.447  27.494  1.00 90.41           C
ATOM   2831  H   ALA A 871     -22.297  42.979  28.591  1.00  0.00           H
ATOM   2832  HA  ALA A 871     -21.308  41.833  25.984  1.00  0.00           H
ATOM   2833  HB1 ALA A 871     -21.287  39.762  26.803  1.00  0.00           H
ATOM   2834  HB2 ALA A 871     -21.141  40.528  28.374  1.00  0.00           H
ATOM   2835  HB3 ALA A 871     -22.699  39.955  27.802  1.00  0.00           H
ATOM   2836  N   GLU A 872     -23.489  41.875  24.927  1.00 93.86           N
ATOM   2837  CA  GLU A 872     -24.784  41.846  24.289  1.00 95.23           C
ATOM   2838  C   GLU A 872     -25.522  40.567  24.585  1.00 95.63           C
ATOM   2839  O   GLU A 872     -26.683  40.590  24.926  1.00 96.08           O
ATOM   2840  CB  GLU A 872     -24.630  41.931  22.772  1.00 94.71           C
ATOM   2841  CG  GLU A 872     -24.163  43.250  22.251  1.00 92.93           C
ATOM   2842  CD  GLU A 872     -22.675  43.339  22.204  1.00 92.06           C
ATOM   2843  OE1 GLU A 872     -22.014  42.293  22.108  1.00 90.21           O
ATOM   2844  OE2 GLU A 872     -22.164  44.463  22.267  1.00 92.53           O1-
ATOM   2845  H   GLU A 872     -22.661  41.900  24.347  1.00  0.00           H
ATOM   2846  HA  GLU A 872     -25.383  42.690  24.638  1.00  0.00           H
ATOM   2847  HB2 GLU A 872     -24.059  41.088  22.379  1.00  0.00           H
ATOM   2848  HB3 GLU A 872     -25.620  41.788  22.334  1.00  0.00           H
ATOM   2849  HG2 GLU A 872     -24.519  43.385  21.229  1.00  0.00           H
ATOM   2850  HG3 GLU A 872     -24.576  44.074  22.835  1.00  0.00           H
ATOM   2851  N   GLY A 873     -24.841  39.445  24.474  1.00 95.73           N
ATOM   2852  CA  GLY A 873     -25.504  38.176  24.661  1.00 95.82           C
ATOM   2853  C   GLY A 873     -24.615  36.960  24.714  1.00 96.39           C
ATOM   2854  O   GLY A 873     -23.417  37.045  24.463  1.00 96.18           O
ATOM   2855  H   GLY A 873     -23.868  39.456  24.204  1.00  0.00           H
ATOM   2856  HA2 GLY A 873     -26.074  38.196  25.593  1.00  0.00           H
ATOM   2857  HA3 GLY A 873     -26.223  38.033  23.852  1.00  0.00           H
ATOM   2858  N   GLY A 874     -25.222  35.821  25.036  1.00 96.67           N
ATOM   2859  CA  GLY A 874     -24.520  34.552  25.126  1.00 95.92           C
ATOM   2860  C   GLY A 874     -25.302  33.545  25.933  1.00 94.46           C
ATOM   2861  O   GLY A 874     -26.505  33.635  26.034  1.00 94.92           O
ATOM   2862  H   GLY A 874     -26.213  35.819  25.232  1.00  0.00           H
ATOM   2863  HA2 GLY A 874     -24.359  34.156  24.122  1.00  0.00           H
ATOM   2864  HA3 GLY A 874     -23.539  34.690  25.585  1.00  0.00           H
ATOM   2865  N   LYS A 875     -24.608  32.560  26.476  1.00 92.73           N
ATOM   2866  CA  LYS A 875     -25.189  31.580  27.372  1.00 90.53           C
ATOM   2867  C   LYS A 875     -24.361  31.748  28.609  1.00 89.19           C
ATOM   2868  O   LYS A 875     -23.146  31.758  28.524  1.00 89.71           O
ATOM   2869  CB  LYS A 875     -25.006  30.167  26.854  1.00 90.10           C
ATOM   2870  CG  LYS A 875     -24.999  29.116  27.942  1.00 88.32           C
ATOM   2871  CD  LYS A 875     -25.976  28.023  27.634  1.00 86.29           C
ATOM   2872  CE  LYS A 875     -26.195  27.153  28.835  1.00 85.00           C
ATOM   2873  NZ  LYS A 875     -25.814  27.858  30.070  1.00 84.67           N1+
ATOM   2874  H   LYS A 875     -23.606  32.533  26.350  1.00  0.00           H
ATOM   2875  HA  LYS A 875     -26.241  31.762  27.605  1.00  0.00           H
ATOM   2876  HB2 LYS A 875     -25.781  29.977  26.110  1.00  0.00           H
ATOM   2877  HB3 LYS A 875     -24.066  30.084  26.305  1.00  0.00           H
ATOM   2878  HG2 LYS A 875     -23.996  28.766  28.195  1.00  0.00           H
ATOM   2879  HG3 LYS A 875     -25.441  29.626  28.779  1.00  0.00           H
ATOM   2880  HD2 LYS A 875     -26.936  28.463  27.356  1.00  0.00           H
ATOM   2881  HD3 LYS A 875     -25.649  27.429  26.780  1.00  0.00           H
ATOM   2882  HE2 LYS A 875     -27.231  26.817  28.894  1.00  0.00           H
ATOM   2883  HE3 LYS A 875     -25.573  26.260  28.761  1.00  0.00           H
ATOM   2884  HZ1 LYS A 875     -25.943  27.244  30.862  1.00  0.00           H
ATOM   2885  HZ2 LYS A 875     -24.844  28.134  30.014  1.00  0.00           H
ATOM   2886  HZ3 LYS A 875     -26.391  28.679  30.186  1.00  0.00           H
ATOM   2887  N   VAL A 876     -24.996  31.885  29.759  1.00 86.27           N
ATOM   2888  CA  VAL A 876     -24.245  32.122  30.965  1.00 82.70           C
ATOM   2889  C   VAL A 876     -24.676  31.270  32.123  1.00 80.85           C
ATOM   2890  O   VAL A 876     -25.824  30.892  32.213  1.00 80.69           O
ATOM   2891  CB  VAL A 876     -24.448  33.526  31.342  1.00 81.63           C
ATOM   2892  CG1 VAL A 876     -23.924  34.388  30.269  1.00 81.50           C
ATOM   2893  CG2 VAL A 876     -25.886  33.762  31.468  1.00 80.38           C
ATOM   2894  H   VAL A 876     -26.005  31.881  29.803  1.00  0.00           H
ATOM   2895  HA  VAL A 876     -23.184  31.998  30.785  1.00  0.00           H
ATOM   2896  HB  VAL A 876     -23.925  33.761  32.269  1.00  0.00           H
ATOM   2897 HG11 VAL A 876     -23.902  35.424  30.610  1.00  0.00           H
ATOM   2898 HG12 VAL A 876     -22.895  34.138  30.005  1.00  0.00           H
ATOM   2899 HG13 VAL A 876     -24.522  34.393  29.356  1.00  0.00           H
ATOM   2900 HG21 VAL A 876     -26.036  34.821  31.682  1.00  0.00           H
ATOM   2901 HG22 VAL A 876     -26.498  33.582  30.584  1.00  0.00           H
ATOM   2902 HG23 VAL A 876     -26.357  33.276  32.320  1.00  0.00           H
ATOM   2903  N   PRO A 877     -23.731  30.968  33.002  1.00 78.51           N
ATOM   2904  CA  PRO A 877     -23.989  30.184  34.209  1.00 75.78           C
ATOM   2905  C   PRO A 877     -24.377  31.119  35.345  1.00 73.16           C
ATOM   2906  O   PRO A 877     -23.548  31.843  35.894  1.00 71.58           O
ATOM   2907  CB  PRO A 877     -22.660  29.518  34.475  1.00 75.70           C
ATOM   2908  CG  PRO A 877     -21.677  30.485  34.009  1.00 76.82           C
ATOM   2909  CD  PRO A 877     -22.288  31.199  32.820  1.00 77.54           C
ATOM   2910  HA  PRO A 877     -24.757  29.422  34.058  1.00  0.00           H
ATOM   2911  HB2 PRO A 877     -22.513  29.242  35.520  1.00  0.00           H
ATOM   2912  HB3 PRO A 877     -22.587  28.605  33.882  1.00  0.00           H
ATOM   2913  HG2 PRO A 877     -21.430  31.203  34.791  1.00  0.00           H
ATOM   2914  HG3 PRO A 877     -20.735  30.004  33.743  1.00  0.00           H
ATOM   2915  HD2 PRO A 877     -22.024  32.258  32.810  1.00  0.00           H
ATOM   2916  HD3 PRO A 877     -21.924  30.722  31.908  1.00  0.00           H
ATOM   2917  N   ILE A 878     -25.661  31.122  35.663  1.00 71.04           N
ATOM   2918  CA  ILE A 878     -26.229  32.207  36.449  1.00 67.87           C
ATOM   2919  C   ILE A 878     -25.751  32.142  37.870  1.00 66.23           C
ATOM   2920  O   ILE A 878     -25.236  33.117  38.415  1.00 66.42           O
ATOM   2921  CB  ILE A 878     -27.760  32.184  36.397  1.00 66.48           C
ATOM   2922  CG1 ILE A 878     -28.267  32.684  35.046  1.00 66.03           C
ATOM   2923  CG2 ILE A 878     -28.316  33.063  37.446  1.00 67.03           C
ATOM   2924  CD1 ILE A 878     -27.907  34.114  34.743  1.00 64.70           C
ATOM   2925  H   ILE A 878     -26.295  30.505  35.177  1.00  0.00           H
ATOM   2926  HA  ILE A 878     -25.852  33.153  36.068  1.00  0.00           H
ATOM   2927  HB  ILE A 878     -28.130  31.170  36.559  1.00  0.00           H
ATOM   2928 HG12 ILE A 878     -27.890  32.044  34.247  1.00  0.00           H
ATOM   2929 HG13 ILE A 878     -29.353  32.581  35.012  1.00  0.00           H
ATOM   2930 HG21 ILE A 878     -29.372  33.272  37.271  1.00  0.00           H
ATOM   2931 HG22 ILE A 878     -28.268  32.605  38.431  1.00  0.00           H
ATOM   2932 HG23 ILE A 878     -27.797  34.011  37.494  1.00  0.00           H
ATOM   2933 HD11 ILE A 878     -28.410  34.427  33.828  1.00  0.00           H
ATOM   2934 HD12 ILE A 878     -28.223  34.810  35.514  1.00  0.00           H
ATOM   2935 HD13 ILE A 878     -26.849  34.252  34.555  1.00  0.00           H
ATOM   2936  N   LYS A 879     -25.893  30.971  38.456  1.00 63.47           N
ATOM   2937  CA  LYS A 879     -25.635  30.796  39.863  1.00 60.43           C
ATOM   2938  C   LYS A 879     -24.181  31.068  40.259  1.00 58.98           C
ATOM   2939  O   LYS A 879     -23.816  31.042  41.434  1.00 58.93           O
ATOM   2940  CB  LYS A 879     -26.074  29.406  40.233  1.00 60.47           C
ATOM   2941  CG  LYS A 879     -27.416  29.100  39.624  1.00 60.85           C
ATOM   2942  CD  LYS A 879     -28.025  27.871  40.200  1.00 61.88           C
ATOM   2943  CE  LYS A 879     -29.400  27.655  39.639  1.00 61.97           C
ATOM   2944  NZ  LYS A 879     -29.918  26.402  40.234  1.00 63.93           N1+
ATOM   2945  H   LYS A 879     -26.288  30.200  37.938  1.00  0.00           H
ATOM   2946  HA  LYS A 879     -26.252  31.506  40.416  1.00  0.00           H
ATOM   2947  HB2 LYS A 879     -25.371  28.692  39.801  1.00  0.00           H
ATOM   2948  HB3 LYS A 879     -25.950  29.246  41.291  1.00  0.00           H
ATOM   2949  HG2 LYS A 879     -28.064  29.932  39.850  1.00  0.00           H
ATOM   2950  HG3 LYS A 879     -27.373  28.991  38.539  1.00  0.00           H
ATOM   2951  HD2 LYS A 879     -27.396  27.021  39.932  1.00  0.00           H
ATOM   2952  HD3 LYS A 879     -27.990  27.905  41.260  1.00  0.00           H
ATOM   2953  HE2 LYS A 879     -30.082  28.471  39.845  1.00  0.00           H
ATOM   2954  HE3 LYS A 879     -29.369  27.541  38.555  1.00  0.00           H
ATOM   2955  HZ1 LYS A 879     -30.900  26.284  40.011  1.00  0.00           H
ATOM   2956  HZ2 LYS A 879     -29.393  25.611  39.891  1.00  0.00           H
ATOM   2957  HZ3 LYS A 879     -29.834  26.436  41.242  1.00  0.00           H
ATOM   2958  N   TRP A 880     -23.366  31.383  39.274  1.00 57.14           N
ATOM   2959  CA  TRP A 880     -22.017  31.749  39.535  1.00 56.01           C
ATOM   2960  C   TRP A 880     -21.815  33.225  39.278  1.00 56.53           C
ATOM   2961  O   TRP A 880     -20.700  33.744  39.445  1.00 56.11           O
ATOM   2962  CB  TRP A 880     -21.090  30.950  38.643  1.00 55.45           C
ATOM   2963  CG  TRP A 880     -20.836  29.663  39.178  1.00 53.17           C
ATOM   2964  CD1 TRP A 880     -19.778  29.308  39.915  1.00 52.69           C
ATOM   2965  CD2 TRP A 880     -21.659  28.513  39.063  1.00 53.29           C
ATOM   2966  NE1 TRP A 880     -19.864  27.998  40.278  1.00 52.82           N
ATOM   2967  CE3 TRP A 880     -22.871  28.245  38.420  1.00 53.20           C
ATOM   2968  CE2 TRP A 880     -21.018  27.479  39.769  1.00 53.24           C
ATOM   2969  CZ3 TRP A 880     -23.389  26.980  38.493  1.00 51.89           C
ATOM   2970  CZ2 TRP A 880     -21.542  26.201  39.859  1.00 52.58           C
ATOM   2971  CH2 TRP A 880     -22.732  25.967  39.212  1.00 52.17           C
ATOM   2972  H   TRP A 880     -23.708  31.425  38.324  1.00  0.00           H
ATOM   2973  HA  TRP A 880     -21.693  31.592  40.564  1.00  0.00           H
ATOM   2974  HB2 TRP A 880     -21.482  30.860  37.628  1.00  0.00           H
ATOM   2975  HB3 TRP A 880     -20.119  31.439  38.538  1.00  0.00           H
ATOM   2976  HD1 TRP A 880     -18.973  29.978  40.181  1.00  0.00           H
ATOM   2977  HE1 TRP A 880     -19.173  27.509  40.834  1.00  0.00           H
ATOM   2978  HE3 TRP A 880     -23.385  29.015  37.864  1.00  0.00           H
ATOM   2979  HZ3 TRP A 880     -24.323  26.760  37.997  1.00  0.00           H
ATOM   2980  HZ2 TRP A 880     -21.047  25.418  40.402  1.00  0.00           H
ATOM   2981  HH2 TRP A 880     -23.171  24.981  39.259  1.00  0.00           H
ATOM   2982  N   MET A 881     -22.882  33.902  38.864  1.00 56.91           N
ATOM   2983  CA  MET A 881     -22.746  35.291  38.477  1.00 57.91           C
ATOM   2984  C   MET A 881     -23.159  36.275  39.550  1.00 58.40           C
ATOM   2985  O   MET A 881     -24.074  36.014  40.328  1.00 57.50           O
ATOM   2986  CB  MET A 881     -23.531  35.569  37.214  1.00 58.48           C
ATOM   2987  CG  MET A 881     -23.082  34.807  35.998  1.00 58.86           C
ATOM   2988  SD  MET A 881     -24.273  35.111  34.701  1.00 61.03           S
ATOM   2989  CE  MET A 881     -23.913  36.815  34.274  1.00 59.53           C
ATOM   2990  H   MET A 881     -23.788  33.453  38.764  1.00  0.00           H
ATOM   2991  HA  MET A 881     -21.711  35.520  38.213  1.00  0.00           H
ATOM   2992  HB2 MET A 881     -24.573  35.328  37.390  1.00  0.00           H
ATOM   2993  HB3 MET A 881     -23.499  36.636  36.997  1.00  0.00           H
ATOM   2994  HG2 MET A 881     -22.133  35.224  35.659  1.00  0.00           H
ATOM   2995  HG3 MET A 881     -22.815  33.815  36.254  1.00  0.00           H
ATOM   2996  HE1 MET A 881     -24.377  37.065  33.321  1.00  0.00           H
ATOM   2997  HE2 MET A 881     -24.350  37.458  35.030  1.00  0.00           H
ATOM   2998  HE3 MET A 881     -22.839  36.978  34.234  1.00  0.00           H
ATOM   2999  N   ALA A 882     -22.449  37.409  39.560  1.00 60.40           N
ATOM   3000  CA  ALA A 882     -22.803  38.566  40.380  1.00 62.82           C
ATOM   3001  C   ALA A 882     -24.093  39.146  39.849  1.00 64.21           C
ATOM   3002  O   ALA A 882     -24.295  39.231  38.630  1.00 65.64           O
ATOM   3003  CB  ALA A 882     -21.699  39.627  40.313  1.00 63.12           C
ATOM   3004  H   ALA A 882     -21.700  37.522  38.893  1.00  0.00           H
ATOM   3005  HA  ALA A 882     -22.968  38.242  41.399  1.00  0.00           H
ATOM   3006  HB1 ALA A 882     -21.969  40.502  40.896  1.00  0.00           H
ATOM   3007  HB2 ALA A 882     -20.763  39.241  40.712  1.00  0.00           H
ATOM   3008  HB3 ALA A 882     -21.513  39.952  39.288  1.00  0.00           H
ATOM   3009  N   LEU A 883     -24.955  39.561  40.776  1.00 64.64           N
ATOM   3010  CA  LEU A 883     -26.240  40.217  40.452  1.00 64.01           C
ATOM   3011  C   LEU A 883     -26.189  41.282  39.339  1.00 63.51           C
ATOM   3012  O   LEU A 883     -27.044  41.331  38.477  1.00 61.70           O
ATOM   3013  CB  LEU A 883     -26.799  40.849  41.715  1.00 63.45           C
ATOM   3014  CG  LEU A 883     -28.221  41.345  41.621  1.00 62.64           C
ATOM   3015  CD1 LEU A 883     -29.159  40.182  41.288  1.00 61.80           C
ATOM   3016  CD2 LEU A 883     -28.521  41.950  42.956  1.00 62.53           C
ATOM   3017  H   LEU A 883     -24.720  39.440  41.750  1.00  0.00           H
ATOM   3018  HA  LEU A 883     -26.890  39.410  40.114  1.00  0.00           H
ATOM   3019  HB2 LEU A 883     -26.688  40.188  42.570  1.00  0.00           H
ATOM   3020  HB3 LEU A 883     -26.150  41.690  41.969  1.00  0.00           H
ATOM   3021  HG  LEU A 883     -28.242  42.143  40.891  1.00  0.00           H
ATOM   3022 HD11 LEU A 883     -30.198  40.483  41.423  1.00  0.00           H
ATOM   3023 HD12 LEU A 883     -29.065  39.877  40.246  1.00  0.00           H
ATOM   3024 HD13 LEU A 883     -28.996  39.307  41.900  1.00  0.00           H
ATOM   3025 HD21 LEU A 883     -29.331  42.668  42.849  1.00  0.00           H
ATOM   3026 HD22 LEU A 883     -28.792  41.202  43.703  1.00  0.00           H
ATOM   3027 HD23 LEU A 883     -27.687  42.528  43.356  1.00  0.00           H
ATOM   3028  N   GLU A 884     -25.161  42.096  39.326  1.00 63.81           N
ATOM   3029  CA  GLU A 884     -25.021  43.058  38.267  1.00 64.45           C
ATOM   3030  C   GLU A 884     -24.838  42.416  36.928  1.00 63.84           C
ATOM   3031  O   GLU A 884     -25.455  42.779  35.967  1.00 63.64           O
ATOM   3032  CB  GLU A 884     -23.791  43.853  38.541  1.00 65.84           C
ATOM   3033  CG  GLU A 884     -23.007  43.273  39.645  1.00 69.05           C
ATOM   3034  CD  GLU A 884     -21.569  43.554  39.495  1.00 71.88           C
ATOM   3035  OE1 GLU A 884     -20.779  42.614  39.522  1.00 73.62           O
ATOM   3036  OE2 GLU A 884     -21.216  44.719  39.343  1.00 73.11           O1-
ATOM   3037  H   GLU A 884     -24.447  42.040  40.036  1.00  0.00           H
ATOM   3038  HA  GLU A 884     -25.889  43.721  38.236  1.00  0.00           H
ATOM   3039  HB2 GLU A 884     -23.184  44.026  37.645  1.00  0.00           H
ATOM   3040  HB3 GLU A 884     -24.095  44.856  38.845  1.00  0.00           H
ATOM   3041  HG2 GLU A 884     -23.354  43.609  40.624  1.00  0.00           H
ATOM   3042  HG3 GLU A 884     -22.943  42.184  39.658  1.00  0.00           H
ATOM   3043  N   SER A 885     -23.993  41.422  36.854  1.00 63.76           N
ATOM   3044  CA  SER A 885     -23.828  40.769  35.578  1.00 63.79           C
ATOM   3045  C   SER A 885     -25.130  40.178  35.085  1.00 64.13           C
ATOM   3046  O   SER A 885     -25.448  40.225  33.904  1.00 64.17           O
ATOM   3047  CB  SER A 885     -22.824  39.662  35.718  1.00 64.44           C
ATOM   3048  OG  SER A 885     -21.646  40.148  36.313  1.00 65.22           O
ATOM   3049  H   SER A 885     -23.476  41.095  37.658  1.00  0.00           H
ATOM   3050  HA  SER A 885     -23.458  41.486  34.847  1.00  0.00           H
ATOM   3051  HB2 SER A 885     -23.186  38.845  36.339  1.00  0.00           H
ATOM   3052  HB3 SER A 885     -22.572  39.257  34.740  1.00  0.00           H
ATOM   3053  HG  SER A 885     -21.339  40.894  35.815  1.00  0.00           H
ATOM   3054  N   ILE A 886     -25.880  39.588  35.998  1.00 64.85           N
ATOM   3055  CA  ILE A 886     -27.157  39.002  35.638  1.00 66.19           C
ATOM   3056  C   ILE A 886     -28.144  40.114  35.269  1.00 67.36           C
ATOM   3057  O   ILE A 886     -28.858  40.006  34.281  1.00 68.43           O
ATOM   3058  CB  ILE A 886     -27.703  38.147  36.777  1.00 65.90           C
ATOM   3059  CG1 ILE A 886     -26.670  37.084  37.170  1.00 66.42           C
ATOM   3060  CG2 ILE A 886     -28.999  37.467  36.367  1.00 66.51           C
ATOM   3061  CD1 ILE A 886     -27.009  36.298  38.443  1.00 65.96           C
ATOM   3062  H   ILE A 886     -25.577  39.559  36.963  1.00  0.00           H
ATOM   3063  HA  ILE A 886     -27.017  38.360  34.765  1.00  0.00           H
ATOM   3064  HB  ILE A 886     -27.893  38.775  37.649  1.00  0.00           H
ATOM   3065 HG12 ILE A 886     -26.547  36.384  36.343  1.00  0.00           H
ATOM   3066 HG13 ILE A 886     -25.688  37.517  37.335  1.00  0.00           H
ATOM   3067 HG21 ILE A 886     -29.377  36.764  37.105  1.00  0.00           H
ATOM   3068 HG22 ILE A 886     -29.803  38.191  36.231  1.00  0.00           H
ATOM   3069 HG23 ILE A 886     -28.890  36.935  35.423  1.00  0.00           H
ATOM   3070 HD11 ILE A 886     -26.326  35.472  38.619  1.00  0.00           H
ATOM   3071 HD12 ILE A 886     -26.927  36.954  39.310  1.00  0.00           H
ATOM   3072 HD13 ILE A 886     -28.019  35.898  38.463  1.00  0.00           H
ATOM   3073  N   LEU A 887     -28.196  41.153  36.074  1.00 67.62           N
ATOM   3074  CA  LEU A 887     -28.987  42.321  35.752  1.00 67.27           C
ATOM   3075  C   LEU A 887     -28.496  43.178  34.601  1.00 67.62           C
ATOM   3076  O   LEU A 887     -29.277  43.631  33.802  1.00 67.77           O
ATOM   3077  CB  LEU A 887     -29.154  43.187  36.982  1.00 66.35           C
ATOM   3078  CG  LEU A 887     -30.444  42.930  37.731  1.00 65.96           C
ATOM   3079  CD1 LEU A 887     -30.878  41.515  37.610  1.00 65.75           C
ATOM   3080  CD2 LEU A 887     -30.267  43.288  39.142  1.00 66.38           C
ATOM   3081  H   LEU A 887     -27.622  41.175  36.910  1.00  0.00           H
ATOM   3082  HA  LEU A 887     -29.951  42.006  35.360  1.00  0.00           H
ATOM   3083  HB2 LEU A 887     -28.259  43.311  37.591  1.00  0.00           H
ATOM   3084  HB3 LEU A 887     -29.514  44.142  36.668  1.00  0.00           H
ATOM   3085  HG  LEU A 887     -31.258  43.540  37.327  1.00  0.00           H
ATOM   3086 HD11 LEU A 887     -31.672  41.318  38.331  1.00  0.00           H
ATOM   3087 HD12 LEU A 887     -31.328  41.254  36.654  1.00  0.00           H
ATOM   3088 HD13 LEU A 887     -30.085  40.805  37.847  1.00  0.00           H
ATOM   3089 HD21 LEU A 887     -31.233  43.406  39.633  1.00  0.00           H
ATOM   3090 HD22 LEU A 887     -29.759  42.488  39.654  1.00  0.00           H
ATOM   3091 HD23 LEU A 887     -29.715  44.219  39.281  1.00  0.00           H
ATOM   3092  N   HIS A 888     -27.201  43.432  34.547  1.00 68.77           N
ATOM   3093  CA  HIS A 888     -26.664  44.271  33.493  1.00 69.72           C
ATOM   3094  C   HIS A 888     -25.597  43.715  32.568  1.00 69.26           C
ATOM   3095  O   HIS A 888     -25.033  44.432  31.783  1.00 68.31           O
ATOM   3096  CB  HIS A 888     -26.220  45.576  34.098  1.00 72.01           C
ATOM   3097  CG  HIS A 888     -27.248  46.169  34.995  1.00 74.61           C
ATOM   3098  ND1 HIS A 888     -28.017  45.603  35.948  1.00 75.52           N
ATOM   3099  CD2 HIS A 888     -27.613  47.492  34.941  1.00 75.05           C
ATOM   3100  CE1 HIS A 888     -28.810  46.594  36.464  1.00 75.35           C
ATOM   3101  NE2 HIS A 888     -28.551  47.722  35.836  1.00 75.88           N
ATOM   3102  H   HIS A 888     -26.554  43.049  35.235  1.00  0.00           H
ATOM   3103  HA  HIS A 888     -27.431  44.554  32.770  1.00  0.00           H
ATOM   3104  HB2 HIS A 888     -25.367  45.354  34.732  1.00  0.00           H
ATOM   3105  HB3 HIS A 888     -25.959  46.298  33.325  1.00  0.00           H
ATOM   3106  HD1 HIS A 888     -27.996  44.636  36.234  1.00  0.00           H
ATOM   3107  HD2 HIS A 888     -27.244  48.281  34.303  1.00  0.00           H
ATOM   3108  HE1 HIS A 888     -29.536  46.472  37.255  1.00  0.00           H
ATOM   3109  N   ARG A 889     -25.263  42.456  32.679  1.00 69.81           N
ATOM   3110  CA  ARG A 889     -24.292  41.941  31.763  1.00 69.53           C
ATOM   3111  C   ARG A 889     -23.114  42.844  31.872  1.00 67.35           C
ATOM   3112  O   ARG A 889     -22.424  43.081  30.923  1.00 64.34           O
ATOM   3113  CB  ARG A 889     -24.820  41.984  30.353  1.00 73.85           C
ATOM   3114  CG  ARG A 889     -24.923  40.620  29.702  1.00 80.94           C
ATOM   3115  CD  ARG A 889     -25.445  40.522  28.269  1.00 -1.00           C
ATOM   3116  NE  ARG A 889     -25.485  39.138  27.784  1.00 -1.00           N
ATOM   3117  CZ  ARG A 889     -24.461  38.511  27.177  1.00 -1.00           C
ATOM   3118  NH1 ARG A 889     -23.311  39.172  26.921  1.00 -1.00           N
ATOM   3119  NH2 ARG A 889     -24.618  37.218  26.827  1.00 -1.00           N1+
ATOM   3120  H   ARG A 889     -25.709  41.830  33.339  1.00  0.00           H
ATOM   3121  HA  ARG A 889     -23.978  40.937  32.046  1.00  0.00           H
ATOM   3122  HB2 ARG A 889     -25.847  42.352  30.332  1.00  0.00           H
ATOM   3123  HB3 ARG A 889     -24.316  42.654  29.656  1.00  0.00           H
ATOM   3124  HG2 ARG A 889     -23.936  40.159  29.666  1.00  0.00           H
ATOM   3125  HG3 ARG A 889     -25.597  39.990  30.282  1.00  0.00           H
ATOM   3126  HD2 ARG A 889     -26.457  40.924  28.222  1.00 -1.00           H
ATOM   3127  HD3 ARG A 889     -24.796  41.093  27.605  1.00 -1.00           H
ATOM   3128  HE  ARG A 889     -26.358  38.653  27.933  1.00 -1.00           H
ATOM   3129 HH11 ARG A 889     -22.546  38.695  26.465  1.00 -1.00           H
ATOM   3130 HH12 ARG A 889     -23.217  40.142  27.185  1.00 -1.00           H
ATOM   3131 HH21 ARG A 889     -23.865  36.724  26.370  1.00 -1.00           H
ATOM   3132 HH22 ARG A 889     -25.489  36.745  27.021  1.00 -1.00           H
ATOM   3133  N   ILE A 890     -22.883  43.345  33.062  1.00 66.58           N
ATOM   3134  CA  ILE A 890     -21.687  44.121  33.356  1.00 65.89           C
ATOM   3135  C   ILE A 890     -20.697  43.229  34.095  1.00 65.14           C
ATOM   3136  O   ILE A 890     -21.015  42.659  35.127  1.00 65.94           O
ATOM   3137  CB  ILE A 890     -22.014  45.329  34.217  1.00 65.65           C
ATOM   3138  CG1 ILE A 890     -23.028  46.222  33.512  1.00 65.03           C
ATOM   3139  CG2 ILE A 890     -20.766  46.118  34.475  1.00 67.23           C
ATOM   3140  CD1 ILE A 890     -23.644  47.238  34.458  1.00 64.92           C
ATOM   3141  H   ILE A 890     -23.512  43.127  33.821  1.00  0.00           H
ATOM   3142  HA  ILE A 890     -21.228  44.501  32.444  1.00  0.00           H
ATOM   3143  HB  ILE A 890     -22.436  44.995  35.167  1.00  0.00           H
ATOM   3144 HG12 ILE A 890     -22.592  46.713  32.641  1.00  0.00           H
ATOM   3145 HG13 ILE A 890     -23.833  45.649  33.154  1.00  0.00           H
ATOM   3146 HG21 ILE A 890     -20.969  47.032  35.030  1.00  0.00           H
ATOM   3147 HG22 ILE A 890     -20.038  45.580  35.083  1.00  0.00           H
ATOM   3148 HG23 ILE A 890     -20.272  46.409  33.547  1.00  0.00           H
ATOM   3149 HD11 ILE A 890     -24.480  47.764  33.999  1.00  0.00           H
ATOM   3150 HD12 ILE A 890     -23.971  46.806  35.403  1.00  0.00           H
ATOM   3151 HD13 ILE A 890     -22.923  48.015  34.711  1.00  0.00           H
ATOM   3152  N   TYR A 891     -19.506  43.097  33.553  1.00 63.37           N
ATOM   3153  CA  TYR A 891     -18.523  42.213  34.108  1.00 61.22           C
ATOM   3154  C   TYR A 891     -17.279  42.963  34.492  1.00 60.93           C
ATOM   3155  O   TYR A 891     -16.813  43.810  33.792  1.00 60.50           O
ATOM   3156  CB  TYR A 891     -18.178  41.123  33.114  1.00 59.71           C
ATOM   3157  CG  TYR A 891     -19.319  40.234  32.774  1.00 59.11           C
ATOM   3158  CD1 TYR A 891     -19.476  39.041  33.382  1.00 59.27           C
ATOM   3159  CD2 TYR A 891     -20.223  40.586  31.832  1.00 59.97           C
ATOM   3160  CE1 TYR A 891     -20.493  38.241  33.081  1.00 59.58           C
ATOM   3161  CE2 TYR A 891     -21.250  39.782  31.517  1.00 59.19           C
ATOM   3162  CZ  TYR A 891     -21.378  38.610  32.152  1.00 59.15           C
ATOM   3163  OH  TYR A 891     -22.400  37.763  31.875  1.00 60.15           O
ATOM   3164  H   TYR A 891     -19.291  43.582  32.690  1.00  0.00           H
ATOM   3165  HA  TYR A 891     -18.875  41.703  35.007  1.00  0.00           H
ATOM   3166  HB2 TYR A 891     -17.805  41.551  32.188  1.00  0.00           H
ATOM   3167  HB3 TYR A 891     -17.366  40.506  33.502  1.00  0.00           H
ATOM   3168  HD1 TYR A 891     -18.775  38.729  34.143  1.00  0.00           H
ATOM   3169  HD2 TYR A 891     -20.124  41.530  31.316  1.00  0.00           H
ATOM   3170  HE1 TYR A 891     -20.594  37.293  33.590  1.00  0.00           H
ATOM   3171  HE2 TYR A 891     -21.958  40.085  30.760  1.00  0.00           H
ATOM   3172  HH  TYR A 891     -23.016  38.115  31.251  1.00  0.00           H
ATOM   3173  N   THR A 892     -16.736  42.638  35.637  1.00 60.44           N
ATOM   3174  CA  THR A 892     -15.591  43.335  36.130  1.00 59.86           C
ATOM   3175  C   THR A 892     -14.885  42.321  36.969  1.00 58.98           C
ATOM   3176  O   THR A 892     -15.459  41.288  37.318  1.00 59.75           O
ATOM   3177  CB  THR A 892     -15.991  44.493  37.036  1.00 60.45           C
ATOM   3178  OG1 THR A 892     -16.875  44.017  38.054  1.00 60.49           O
ATOM   3179  CG2 THR A 892     -16.705  45.532  36.259  1.00 61.33           C
ATOM   3180  H   THR A 892     -17.101  41.868  36.185  1.00  0.00           H
ATOM   3181  HA  THR A 892     -14.907  43.657  35.340  1.00  0.00           H
ATOM   3182  HB  THR A 892     -15.113  44.943  37.504  1.00  0.00           H
ATOM   3183  HG1 THR A 892     -17.681  43.736  37.647  1.00  0.00           H
ATOM   3184 HG21 THR A 892     -16.830  46.438  36.852  1.00  0.00           H
ATOM   3185 HG22 THR A 892     -16.113  45.789  35.402  1.00  0.00           H
ATOM   3186 HG23 THR A 892     -17.700  45.233  35.930  1.00  0.00           H
ATOM   3187  N   HIS A 893     -13.685  42.631  37.376  1.00 56.79           N
ATOM   3188  CA  HIS A 893     -12.920  41.700  38.117  1.00 55.27           C
ATOM   3189  C   HIS A 893     -13.656  41.395  39.348  1.00 54.15           C
ATOM   3190  O   HIS A 893     -13.470  40.373  39.907  1.00 54.85           O
ATOM   3191  CB  HIS A 893     -11.598  42.303  38.444  1.00 56.99           C
ATOM   3192  CG  HIS A 893     -10.702  42.433  37.263  1.00 59.73           C
ATOM   3193  ND1 HIS A 893     -10.148  43.627  36.878  1.00 60.88           N
ATOM   3194  CD2 HIS A 893     -10.267  41.514  36.381  1.00 59.70           C
ATOM   3195  CE1 HIS A 893      -9.400  43.437  35.814  1.00 60.85           C
ATOM   3196  NE2 HIS A 893      -9.455  42.163  35.495  1.00 61.83           N
ATOM   3197  H   HIS A 893     -13.258  43.503  37.099  1.00  0.00           H
ATOM   3198  HA  HIS A 893     -12.786  40.777  37.546  1.00  0.00           H
ATOM   3199  HB2 HIS A 893     -11.715  43.280  38.918  1.00  0.00           H
ATOM   3200  HB3 HIS A 893     -11.071  41.682  39.171  1.00  0.00           H
ATOM   3201  HD2 HIS A 893     -10.460  40.453  36.314  1.00  0.00           H
ATOM   3202  HE1 HIS A 893      -8.838  44.197  35.292  1.00  0.00           H
ATOM   3203  HE2 HIS A 893      -8.981  41.724  34.718  1.00  0.00           H
ATOM   3204  N   GLN A 894     -14.465  42.323  39.797  1.00 52.37           N
ATOM   3205  CA  GLN A 894     -15.252  42.151  41.009  1.00 50.31           C
ATOM   3206  C   GLN A 894     -16.438  41.233  40.804  1.00 49.54           C
ATOM   3207  O   GLN A 894     -16.947  40.659  41.745  1.00 49.06           O
ATOM   3208  CB  GLN A 894     -15.711  43.488  41.557  1.00 48.57           C
ATOM   3209  CG  GLN A 894     -14.569  44.388  41.906  1.00 48.53           C
ATOM   3210  CD  GLN A 894     -13.755  43.872  43.073  1.00 49.29           C
ATOM   3211  OE1 GLN A 894     -12.485  43.560  42.814  1.00 50.43           O
ATOM   3212  NE2 GLN A 894     -14.247  43.778  44.200  1.00 48.26           N
ATOM   3213  H   GLN A 894     -14.567  43.182  39.276  1.00  0.00           H
ATOM   3214  HA  GLN A 894     -14.634  41.671  41.767  1.00  0.00           H
ATOM   3215  HB2 GLN A 894     -16.336  43.990  40.817  1.00  0.00           H
ATOM   3216  HB3 GLN A 894     -16.351  43.347  42.430  1.00  0.00           H
ATOM   3217  HG2 GLN A 894     -13.920  44.565  41.048  1.00  0.00           H
ATOM   3218  HG3 GLN A 894     -14.962  45.368  42.183  1.00  0.00           H
ATOM   3219 HE21 GLN A 894     -15.202  44.074  44.360  1.00  0.00           H
ATOM   3220 HE22 GLN A 894     -13.687  43.431  44.967  1.00  0.00           H
ATOM   3221  N   SER A 895     -16.877  41.090  39.570  1.00 49.52           N
ATOM   3222  CA  SER A 895     -17.957  40.176  39.278  1.00 50.54           C
ATOM   3223  C   SER A 895     -17.368  38.768  39.371  1.00 50.26           C
ATOM   3224  O   SER A 895     -18.071  37.801  39.681  1.00 51.61           O
ATOM   3225  CB  SER A 895     -18.530  40.447  37.874  1.00 51.91           C
ATOM   3226  OG  SER A 895     -17.628  40.001  36.848  1.00 55.77           O
ATOM   3227  H   SER A 895     -16.409  41.552  38.800  1.00  0.00           H
ATOM   3228  HA  SER A 895     -18.763  40.287  40.002  1.00  0.00           H
ATOM   3229  HB2 SER A 895     -19.466  39.903  37.757  1.00  0.00           H
ATOM   3230  HB3 SER A 895     -18.756  41.505  37.737  1.00  0.00           H
ATOM   3231  HG  SER A 895     -17.459  39.077  36.966  1.00  0.00           H
ATOM   3232  N   ASP A 896     -16.076  38.659  39.090  1.00 47.62           N
ATOM   3233  CA  ASP A 896     -15.388  37.392  39.222  1.00 46.10           C
ATOM   3234  C   ASP A 896     -15.242  36.945  40.664  1.00 45.30           C
ATOM   3235  O   ASP A 896     -15.423  35.765  40.999  1.00 45.93           O
ATOM   3236  CB  ASP A 896     -14.035  37.437  38.536  1.00 45.39           C
ATOM   3237  CG  ASP A 896     -14.131  37.145  37.027  1.00 46.93           C
ATOM   3238  OD1 ASP A 896     -13.079  37.109  36.385  1.00 48.62           O
ATOM   3239  OD2 ASP A 896     -15.233  36.958  36.451  1.00 49.72           O1-
ATOM   3240  H   ASP A 896     -15.550  39.475  38.809  1.00  0.00           H
ATOM   3241  HA  ASP A 896     -15.996  36.610  38.762  1.00  0.00           H
ATOM   3242  HB2 ASP A 896     -13.518  38.379  38.664  1.00  0.00           H
ATOM   3243  HB3 ASP A 896     -13.371  36.673  38.945  1.00  0.00           H
ATOM   3244  N   VAL A 897     -14.940  37.903  41.525  1.00 43.21           N
ATOM   3245  CA  VAL A 897     -14.803  37.630  42.929  1.00 40.51           C
ATOM   3246  C   VAL A 897     -16.047  36.934  43.416  1.00 40.03           C
ATOM   3247  O   VAL A 897     -15.972  35.970  44.168  1.00 42.04           O
ATOM   3248  CB  VAL A 897     -14.535  38.916  43.709  1.00 39.01           C
ATOM   3249  CG1 VAL A 897     -14.365  38.620  45.197  1.00 38.07           C
ATOM   3250  CG2 VAL A 897     -13.313  39.564  43.164  1.00 35.46           C
ATOM   3251  H   VAL A 897     -14.794  38.846  41.194  1.00  0.00           H
ATOM   3252  HA  VAL A 897     -13.957  36.952  43.057  1.00  0.00           H
ATOM   3253  HB  VAL A 897     -15.365  39.613  43.590  1.00  0.00           H
ATOM   3254 HG11 VAL A 897     -13.796  39.351  45.733  1.00  0.00           H
ATOM   3255 HG12 VAL A 897     -15.335  38.540  45.688  1.00  0.00           H
ATOM   3256 HG13 VAL A 897     -13.851  37.671  45.345  1.00  0.00           H
ATOM   3257 HG21 VAL A 897     -13.128  40.517  43.660  1.00  0.00           H
ATOM   3258 HG22 VAL A 897     -12.431  38.943  43.326  1.00  0.00           H
ATOM   3259 HG23 VAL A 897     -13.368  39.775  42.113  1.00  0.00           H
ATOM   3260  N   TRP A 898     -17.194  37.387  42.945  1.00 38.63           N
ATOM   3261  CA  TRP A 898     -18.439  36.743  43.310  1.00 36.94           C
ATOM   3262  C   TRP A 898     -18.338  35.284  42.961  1.00 35.59           C
ATOM   3263  O   TRP A 898     -18.680  34.428  43.743  1.00 35.32           O
ATOM   3264  CB  TRP A 898     -19.590  37.395  42.589  1.00 36.40           C
ATOM   3265  CG  TRP A 898     -20.851  36.888  43.017  1.00 36.77           C
ATOM   3266  CD1 TRP A 898     -21.276  35.600  42.966  1.00 38.79           C
ATOM   3267  CD2 TRP A 898     -21.902  37.632  43.569  1.00 36.85           C
ATOM   3268  NE1 TRP A 898     -22.540  35.488  43.470  1.00 38.61           N
ATOM   3269  CE3 TRP A 898     -22.065  38.977  43.878  1.00 37.79           C
ATOM   3270  CE2 TRP A 898     -22.953  36.730  43.849  1.00 38.32           C
ATOM   3271  CZ3 TRP A 898     -23.258  39.384  44.428  1.00 36.88           C
ATOM   3272  CZ2 TRP A 898     -24.157  37.133  44.411  1.00 36.58           C
ATOM   3273  CH2 TRP A 898     -24.298  38.456  44.687  1.00 36.19           C
ATOM   3274  H   TRP A 898     -17.209  38.170  42.307  1.00  0.00           H
ATOM   3275  HA  TRP A 898     -18.581  36.849  44.387  1.00  0.00           H
ATOM   3276  HB2 TRP A 898     -19.552  38.475  42.735  1.00  0.00           H
ATOM   3277  HB3 TRP A 898     -19.537  37.227  41.517  1.00  0.00           H
ATOM   3278  HD1 TRP A 898     -20.762  34.773  42.510  1.00  0.00           H
ATOM   3279  HE1 TRP A 898     -23.065  34.626  43.505  1.00  0.00           H
ATOM   3280  HE3 TRP A 898     -21.239  39.645  43.727  1.00  0.00           H
ATOM   3281  HZ3 TRP A 898     -23.405  40.422  44.683  1.00  0.00           H
ATOM   3282  HZ2 TRP A 898     -24.934  36.422  44.639  1.00  0.00           H
ATOM   3283  HH2 TRP A 898     -25.216  38.807  45.134  1.00  0.00           H
ATOM   3284  N   SER A 899     -17.814  35.007  41.784  1.00 35.39           N
ATOM   3285  CA  SER A 899     -17.700  33.656  41.309  1.00 35.44           C
ATOM   3286  C   SER A 899     -16.734  32.902  42.164  1.00 36.70           C
ATOM   3287  O   SER A 899     -16.985  31.742  42.549  1.00 37.25           O
ATOM   3288  CB  SER A 899     -17.223  33.686  39.902  1.00 33.50           C
ATOM   3289  OG  SER A 899     -18.049  34.579  39.208  1.00 35.21           O
ATOM   3290  H   SER A 899     -17.516  35.753  41.169  1.00  0.00           H
ATOM   3291  HA  SER A 899     -18.679  33.172  41.352  1.00  0.00           H
ATOM   3292  HB2 SER A 899     -16.186  33.963  39.758  1.00  0.00           H
ATOM   3293  HB3 SER A 899     -17.372  32.701  39.461  1.00  0.00           H
ATOM   3294  HG  SER A 899     -18.947  34.278  39.274  1.00  0.00           H
ATOM   3295  N   TYR A 900     -15.645  33.585  42.500  1.00 36.61           N
ATOM   3296  CA  TYR A 900     -14.597  32.988  43.291  1.00 34.60           C
ATOM   3297  C   TYR A 900     -15.196  32.404  44.500  1.00 33.99           C
ATOM   3298  O   TYR A 900     -14.764  31.354  44.930  1.00 34.79           O
ATOM   3299  CB  TYR A 900     -13.593  34.021  43.719  1.00 33.85           C
ATOM   3300  CG  TYR A 900     -12.549  33.405  44.586  1.00 33.03           C
ATOM   3301  CD1 TYR A 900     -11.409  32.831  44.042  1.00 33.54           C
ATOM   3302  CD2 TYR A 900     -12.702  33.374  45.951  1.00 34.61           C
ATOM   3303  CE1 TYR A 900     -10.441  32.255  44.846  1.00 33.52           C
ATOM   3304  CE2 TYR A 900     -11.740  32.788  46.779  1.00 34.24           C
ATOM   3305  CZ  TYR A 900     -10.623  32.232  46.214  1.00 34.10           C
ATOM   3306  OH  TYR A 900      -9.706  31.667  47.035  1.00 34.18           O
ATOM   3307  H   TYR A 900     -15.521  34.527  42.144  1.00  0.00           H
ATOM   3308  HA  TYR A 900     -14.137  32.161  42.764  1.00  0.00           H
ATOM   3309  HB2 TYR A 900     -13.153  34.459  42.825  1.00  0.00           H
ATOM   3310  HB3 TYR A 900     -13.999  34.839  44.295  1.00  0.00           H
ATOM   3311  HD1 TYR A 900     -11.270  32.825  42.971  1.00  0.00           H
ATOM   3312  HD2 TYR A 900     -13.576  33.817  46.408  1.00  0.00           H
ATOM   3313  HE1 TYR A 900      -9.576  31.798  44.404  1.00  0.00           H
ATOM   3314  HE2 TYR A 900     -11.876  32.781  47.851  1.00  0.00           H
ATOM   3315  HH  TYR A 900      -8.974  31.279  46.574  1.00  0.00           H
ATOM   3316  N   GLY A 901     -16.193  33.104  45.041  1.00 33.22           N
ATOM   3317  CA  GLY A 901     -16.876  32.694  46.265  1.00 33.74           C
ATOM   3318  C   GLY A 901     -17.798  31.506  46.052  1.00 34.40           C
ATOM   3319  O   GLY A 901     -17.820  30.561  46.856  1.00 34.30           O
ATOM   3320  H   GLY A 901     -16.470  33.975  44.607  1.00  0.00           H
ATOM   3321  HA2 GLY A 901     -16.147  32.465  47.044  1.00  0.00           H
ATOM   3322  HA3 GLY A 901     -17.468  33.534  46.629  1.00  0.00           H
ATOM   3323  N   VAL A 902     -18.551  31.520  44.963  1.00 34.87           N
ATOM   3324  CA  VAL A 902     -19.430  30.386  44.705  1.00 35.73           C
ATOM   3325  C   VAL A 902     -18.544  29.188  44.500  1.00 37.73           C
ATOM   3326  O   VAL A 902     -18.957  28.049  44.736  1.00 38.96           O
ATOM   3327  CB  VAL A 902     -20.320  30.583  43.463  1.00 35.65           C
ATOM   3328  CG1 VAL A 902     -21.353  29.484  43.382  1.00 33.75           C
ATOM   3329  CG2 VAL A 902     -21.017  31.949  43.501  1.00 36.83           C
ATOM   3330  H   VAL A 902     -18.503  32.284  44.302  1.00  0.00           H
ATOM   3331  HA  VAL A 902     -20.067  30.212  45.574  1.00  0.00           H
ATOM   3332  HB  VAL A 902     -19.711  30.553  42.558  1.00  0.00           H
ATOM   3333 HG11 VAL A 902     -22.023  29.642  42.540  1.00  0.00           H
ATOM   3334 HG12 VAL A 902     -20.914  28.501  43.216  1.00  0.00           H
ATOM   3335 HG13 VAL A 902     -21.963  29.432  44.283  1.00  0.00           H
ATOM   3336 HG21 VAL A 902     -21.786  32.039  42.738  1.00  0.00           H
ATOM   3337 HG22 VAL A 902     -21.495  32.129  44.464  1.00  0.00           H
ATOM   3338 HG23 VAL A 902     -20.309  32.744  43.317  1.00  0.00           H
ATOM   3339  N   THR A 903     -17.314  29.471  44.078  1.00 38.28           N
ATOM   3340  CA  THR A 903     -16.369  28.425  43.805  1.00 38.11           C
ATOM   3341  C   THR A 903     -15.865  27.876  45.092  1.00 38.23           C
ATOM   3342  O   THR A 903     -15.717  26.668  45.228  1.00 39.60           O
ATOM   3343  CB  THR A 903     -15.198  28.899  42.936  1.00 37.87           C
ATOM   3344  OG1 THR A 903     -15.704  29.383  41.686  1.00 39.58           O
ATOM   3345  CG2 THR A 903     -14.226  27.769  42.641  1.00 34.35           C
ATOM   3346  H   THR A 903     -17.057  30.430  43.884  1.00  0.00           H
ATOM   3347  HA  THR A 903     -16.876  27.620  43.265  1.00  0.00           H
ATOM   3348  HB  THR A 903     -14.618  29.692  43.379  1.00  0.00           H
ATOM   3349  HG1 THR A 903     -16.249  30.139  41.860  1.00  0.00           H
ATOM   3350 HG21 THR A 903     -13.485  28.081  41.904  1.00  0.00           H
ATOM   3351 HG22 THR A 903     -13.670  27.453  43.524  1.00  0.00           H
ATOM   3352 HG23 THR A 903     -14.739  26.896  42.236  1.00  0.00           H
ATOM   3353  N   VAL A 904     -15.635  28.741  46.060  1.00 38.09           N
ATOM   3354  CA  VAL A 904     -15.222  28.261  47.384  1.00 37.71           C
ATOM   3355  C   VAL A 904     -16.350  27.430  48.004  1.00 39.42           C
ATOM   3356  O   VAL A 904     -16.163  26.290  48.483  1.00 38.34           O
ATOM   3357  CB  VAL A 904     -14.827  29.413  48.266  1.00 36.59           C
ATOM   3358  CG1 VAL A 904     -14.580  28.966  49.646  1.00 34.39           C
ATOM   3359  CG2 VAL A 904     -13.563  30.023  47.718  1.00 36.52           C
ATOM   3360  H   VAL A 904     -15.763  29.732  45.907  1.00  0.00           H
ATOM   3361  HA  VAL A 904     -14.361  27.598  47.267  1.00  0.00           H
ATOM   3362  HB  VAL A 904     -15.612  30.170  48.277  1.00  0.00           H
ATOM   3363 HG11 VAL A 904     -14.178  29.780  50.251  1.00  0.00           H
ATOM   3364 HG12 VAL A 904     -15.478  28.632  50.162  1.00  0.00           H
ATOM   3365 HG13 VAL A 904     -13.854  28.153  49.681  1.00  0.00           H
ATOM   3366 HG21 VAL A 904     -13.285  30.907  48.292  1.00  0.00           H
ATOM   3367 HG22 VAL A 904     -12.728  29.326  47.777  1.00  0.00           H
ATOM   3368 HG23 VAL A 904     -13.628  30.320  46.682  1.00  0.00           H
ATOM   3369  N   TRP A 905     -17.544  27.918  47.852  1.00 41.47           N
ATOM   3370  CA  TRP A 905     -18.612  27.181  48.395  1.00 42.49           C
ATOM   3371  C   TRP A 905     -18.620  25.831  47.775  1.00 43.66           C
ATOM   3372  O   TRP A 905     -18.741  24.859  48.451  1.00 44.82           O
ATOM   3373  CB  TRP A 905     -19.898  27.867  48.041  1.00 41.63           C
ATOM   3374  CG  TRP A 905     -20.979  27.392  48.844  1.00 42.12           C
ATOM   3375  CD1 TRP A 905     -21.214  27.698  50.110  1.00 41.70           C
ATOM   3376  CD2 TRP A 905     -21.980  26.480  48.457  1.00 42.93           C
ATOM   3377  NE1 TRP A 905     -22.296  27.045  50.555  1.00 43.51           N
ATOM   3378  CE3 TRP A 905     -22.272  25.815  47.284  1.00 44.38           C
ATOM   3379  CE2 TRP A 905     -22.789  26.282  49.544  1.00 43.78           C
ATOM   3380  CZ3 TRP A 905     -23.332  25.011  47.253  1.00 45.28           C
ATOM   3381  CZ2 TRP A 905     -23.875  25.466  49.502  1.00 44.15           C
ATOM   3382  CH2 TRP A 905     -24.128  24.839  48.341  1.00 44.32           C
ATOM   3383  H   TRP A 905     -17.701  28.816  47.411  1.00  0.00           H
ATOM   3384  HA  TRP A 905     -18.488  27.100  49.476  1.00  0.00           H
ATOM   3385  HB2 TRP A 905     -19.807  28.938  48.229  1.00  0.00           H
ATOM   3386  HB3 TRP A 905     -20.158  27.787  46.985  1.00  0.00           H
ATOM   3387  HD1 TRP A 905     -21.007  28.622  50.544  1.00  0.00           H
ATOM   3388  HE1 TRP A 905     -22.725  27.221  51.456  1.00  0.00           H
ATOM   3389  HE3 TRP A 905     -21.652  25.939  46.408  1.00  0.00           H
ATOM   3390  HZ3 TRP A 905     -23.555  24.479  46.342  1.00  0.00           H
ATOM   3391  HZ2 TRP A 905     -24.507  25.322  50.365  1.00  0.00           H
ATOM   3392  HH2 TRP A 905     -24.979  24.178  48.271  1.00  0.00           H
ATOM   3393  N   GLU A 906     -18.393  25.733  46.501  1.00 44.62           N
ATOM   3394  CA  GLU A 906     -18.489  24.444  45.898  1.00 46.84           C
ATOM   3395  C   GLU A 906     -17.528  23.504  46.518  1.00 47.80           C
ATOM   3396  O   GLU A 906     -17.821  22.360  46.713  1.00 48.62           O
ATOM   3397  CB  GLU A 906     -18.110  24.562  44.458  1.00 48.70           C
ATOM   3398  CG  GLU A 906     -19.149  25.163  43.587  1.00 51.37           C
ATOM   3399  CD  GLU A 906     -18.942  24.808  42.163  1.00 53.29           C
ATOM   3400  OE1 GLU A 906     -18.052  25.376  41.532  1.00 53.93           O
ATOM   3401  OE2 GLU A 906     -19.657  23.943  41.673  1.00 53.38           O1-
ATOM   3402  H   GLU A 906     -18.263  26.553  45.923  1.00  0.00           H
ATOM   3403  HA  GLU A 906     -19.502  24.045  45.997  1.00  0.00           H
ATOM   3404  HB2 GLU A 906     -17.164  25.067  44.302  1.00  0.00           H
ATOM   3405  HB3 GLU A 906     -17.932  23.551  44.079  1.00  0.00           H
ATOM   3406  HG2 GLU A 906     -20.146  24.835  43.888  1.00  0.00           H
ATOM   3407  HG3 GLU A 906     -19.167  26.226  43.572  1.00  0.00           H
ATOM   3408  N   LEU A 907     -16.348  24.000  46.804  1.00 47.52           N
ATOM   3409  CA  LEU A 907     -15.264  23.185  47.287  1.00 46.62           C
ATOM   3410  C   LEU A 907     -15.428  22.803  48.725  1.00 47.98           C
ATOM   3411  O   LEU A 907     -15.113  21.666  49.106  1.00 49.06           O
ATOM   3412  CB  LEU A 907     -13.978  23.933  47.131  1.00 46.02           C
ATOM   3413  CG  LEU A 907     -13.601  24.199  45.682  1.00 45.49           C
ATOM   3414  CD1 LEU A 907     -12.165  24.714  45.701  1.00 46.14           C
ATOM   3415  CD2 LEU A 907     -13.760  22.938  44.796  1.00 41.48           C
ATOM   3416  H   LEU A 907     -16.170  24.979  46.624  1.00  0.00           H
ATOM   3417  HA  LEU A 907     -15.231  22.241  46.742  1.00  0.00           H
ATOM   3418  HB2 LEU A 907     -14.008  24.878  47.678  1.00  0.00           H
ATOM   3419  HB3 LEU A 907     -13.179  23.348  47.593  1.00  0.00           H
ATOM   3420  HG  LEU A 907     -14.220  24.961  45.244  1.00  0.00           H
ATOM   3421 HD11 LEU A 907     -11.844  24.982  44.695  1.00  0.00           H
ATOM   3422 HD12 LEU A 907     -12.068  25.607  46.319  1.00  0.00           H
ATOM   3423 HD13 LEU A 907     -11.468  23.965  46.079  1.00  0.00           H
ATOM   3424 HD21 LEU A 907     -13.340  23.115  43.806  1.00  0.00           H
ATOM   3425 HD22 LEU A 907     -13.237  22.084  45.221  1.00  0.00           H
ATOM   3426 HD23 LEU A 907     -14.804  22.668  44.635  1.00  0.00           H
ATOM   3427  N   MET A 908     -15.925  23.739  49.532  1.00 48.18           N
ATOM   3428  CA  MET A 908     -16.163  23.461  50.945  1.00 47.69           C
ATOM   3429  C   MET A 908     -17.335  22.516  51.172  1.00 47.63           C
ATOM   3430  O   MET A 908     -17.358  21.813  52.172  1.00 48.03           O
ATOM   3431  CB  MET A 908     -16.425  24.744  51.701  1.00 49.02           C
ATOM   3432  CG  MET A 908     -15.317  25.737  51.630  1.00 49.15           C
ATOM   3433  SD  MET A 908     -13.901  24.962  52.314  1.00 50.86           S
ATOM   3434  CE  MET A 908     -12.597  26.169  51.949  1.00 48.58           C
ATOM   3435  H   MET A 908     -16.159  24.653  49.161  1.00  0.00           H
ATOM   3436  HA  MET A 908     -15.295  22.941  51.353  1.00  0.00           H
ATOM   3437  HB2 MET A 908     -17.328  25.217  51.310  1.00  0.00           H
ATOM   3438  HB3 MET A 908     -16.635  24.524  52.750  1.00  0.00           H
ATOM   3439  HG2 MET A 908     -15.084  26.038  50.615  1.00  0.00           H
ATOM   3440  HG3 MET A 908     -15.555  26.642  52.188  1.00  0.00           H
ATOM   3441  HE1 MET A 908     -11.602  25.741  52.042  1.00  0.00           H
ATOM   3442  HE2 MET A 908     -12.696  26.509  50.920  1.00  0.00           H
ATOM   3443  HE3 MET A 908     -12.679  27.035  52.604  1.00  0.00           H
ATOM   3444  N   THR A 909     -18.314  22.500  50.271  1.00 47.41           N
ATOM   3445  CA  THR A 909     -19.439  21.585  50.423  1.00 48.16           C
ATOM   3446  C   THR A 909     -19.170  20.319  49.599  1.00 49.28           C
ATOM   3447  O   THR A 909     -20.089  19.556  49.251  1.00 50.33           O
ATOM   3448  CB  THR A 909     -20.751  22.195  49.905  1.00 48.29           C
ATOM   3449  OG1 THR A 909     -21.014  21.685  48.598  1.00 49.46           O
ATOM   3450  CG2 THR A 909     -20.663  23.662  49.771  1.00 49.28           C
ATOM   3451  H   THR A 909     -18.287  23.115  49.467  1.00  0.00           H
ATOM   3452  HA  THR A 909     -19.602  21.296  51.463  1.00  0.00           H
ATOM   3453  HB  THR A 909     -21.579  21.912  50.557  1.00  0.00           H
ATOM   3454  HG1 THR A 909     -21.454  20.845  48.693  1.00  0.00           H
ATOM   3455 HG21 THR A 909     -21.596  24.016  50.202  1.00  0.00           H
ATOM   3456 HG22 THR A 909     -19.954  24.218  50.383  1.00  0.00           H
ATOM   3457 HG23 THR A 909     -20.775  23.989  48.741  1.00  0.00           H
ATOM   3458  N   PHE A 910     -17.912  20.114  49.223  1.00 49.48           N
ATOM   3459  CA  PHE A 910     -17.544  18.904  48.498  1.00 49.32           C
ATOM   3460  C   PHE A 910     -18.457  18.606  47.333  1.00 50.22           C
ATOM   3461  O   PHE A 910     -18.956  17.482  47.212  1.00 51.63           O
ATOM   3462  CB  PHE A 910     -17.605  17.729  49.441  1.00 48.56           C
ATOM   3463  CG  PHE A 910     -16.684  17.861  50.567  1.00 45.92           C
ATOM   3464  CD1 PHE A 910     -15.333  17.651  50.368  1.00 45.73           C
ATOM   3465  CD2 PHE A 910     -17.135  18.221  51.807  1.00 43.16           C
ATOM   3466  CE1 PHE A 910     -14.421  17.776  51.395  1.00 44.76           C
ATOM   3467  CE2 PHE A 910     -16.233  18.362  52.854  1.00 44.58           C
ATOM   3468  CZ  PHE A 910     -14.868  18.140  52.648  1.00 44.38           C
ATOM   3469  H   PHE A 910     -17.187  20.765  49.491  1.00  0.00           H
ATOM   3470  HA  PHE A 910     -16.533  19.037  48.115  1.00  0.00           H
ATOM   3471  HB2 PHE A 910     -18.610  17.532  49.817  1.00  0.00           H
ATOM   3472  HB3 PHE A 910     -17.296  16.820  48.922  1.00  0.00           H
ATOM   3473  HD1 PHE A 910     -14.969  17.410  49.379  1.00  0.00           H
ATOM   3474  HD2 PHE A 910     -18.186  18.400  51.980  1.00  0.00           H
ATOM   3475  HE1 PHE A 910     -13.381  17.759  51.170  1.00  0.00           H
ATOM   3476  HE2 PHE A 910     -16.591  18.629  53.834  1.00  0.00           H
ATOM   3477  HZ  PHE A 910     -14.165  18.283  53.456  1.00  0.00           H
ATOM   3478  N   GLY A 911     -18.695  19.609  46.495  1.00 49.90           N
ATOM   3479  CA  GLY A 911     -19.301  19.350  45.219  1.00 49.64           C
ATOM   3480  C   GLY A 911     -20.760  19.641  45.168  1.00 50.02           C
ATOM   3481  O   GLY A 911     -21.428  19.306  44.186  1.00 50.15           O
ATOM   3482  H   GLY A 911     -18.305  20.527  46.673  1.00  0.00           H
ATOM   3483  HA2 GLY A 911     -18.815  20.010  44.499  1.00  0.00           H
ATOM   3484  HA3 GLY A 911     -19.110  18.346  44.860  1.00  0.00           H
ATOM   3485  N   SER A 912     -21.277  20.280  46.201  1.00 50.63           N
ATOM   3486  CA  SER A 912     -22.700  20.581  46.191  1.00 51.64           C
ATOM   3487  C   SER A 912     -23.045  21.579  45.108  1.00 51.11           C
ATOM   3488  O   SER A 912     -22.194  22.260  44.573  1.00 50.27           O
ATOM   3489  CB  SER A 912     -23.167  21.048  47.563  1.00 54.08           C
ATOM   3490  OG  SER A 912     -22.829  20.078  48.540  1.00 54.21           O
ATOM   3491  H   SER A 912     -20.707  20.574  46.984  1.00  0.00           H
ATOM   3492  HA  SER A 912     -23.236  19.653  45.973  1.00  0.00           H
ATOM   3493  HB2 SER A 912     -23.048  22.112  47.771  1.00  0.00           H
ATOM   3494  HB3 SER A 912     -24.256  20.992  47.542  1.00  0.00           H
ATOM   3495  HG  SER A 912     -23.218  19.252  48.296  1.00  0.00           H
ATOM   3496  N   LYS A 913     -24.312  21.618  44.758  1.00 52.43           N
ATOM   3497  CA  LYS A 913     -24.736  22.469  43.673  1.00 54.22           C
ATOM   3498  C   LYS A 913     -25.281  23.741  44.274  1.00 54.92           C
ATOM   3499  O   LYS A 913     -26.002  23.706  45.266  1.00 55.73           O
ATOM   3500  CB  LYS A 913     -25.777  21.751  42.815  1.00 54.11           C
ATOM   3501  CG  LYS A 913     -25.778  20.249  43.081  1.00 57.65           C
ATOM   3502  CD  LYS A 913     -25.925  19.372  41.808  1.00 61.57           C
ATOM   3503  CE  LYS A 913     -26.164  17.871  42.220  1.00 63.73           C
ATOM   3504  NZ  LYS A 913     -25.590  16.823  41.294  1.00 63.53           N1+
ATOM   3505  H   LYS A 913     -24.999  21.044  45.225  1.00  0.00           H
ATOM   3506  HA  LYS A 913     -23.910  22.600  42.979  1.00  0.00           H
ATOM   3507  HB2 LYS A 913     -26.786  22.133  42.983  1.00  0.00           H
ATOM   3508  HB3 LYS A 913     -25.564  21.950  41.764  1.00  0.00           H
ATOM   3509  HG2 LYS A 913     -24.840  19.833  43.443  1.00  0.00           H
ATOM   3510  HG3 LYS A 913     -26.535  20.003  43.823  1.00  0.00           H
ATOM   3511  HD2 LYS A 913     -26.754  19.720  41.190  1.00  0.00           H
ATOM   3512  HD3 LYS A 913     -25.021  19.463  41.204  1.00  0.00           H
ATOM   3513  HE2 LYS A 913     -25.715  17.680  43.195  1.00  0.00           H
ATOM   3514  HE3 LYS A 913     -27.233  17.692  42.345  1.00  0.00           H
ATOM   3515  HZ1 LYS A 913     -25.800  15.904  41.657  1.00  0.00           H
ATOM   3516  HZ2 LYS A 913     -26.003  16.922  40.377  1.00  0.00           H
ATOM   3517  HZ3 LYS A 913     -24.589  16.938  41.229  1.00  0.00           H
ATOM   3518  N   PRO A 914     -24.911  24.877  43.699  1.00 55.74           N
ATOM   3519  CA  PRO A 914     -25.391  26.171  44.102  1.00 57.74           C
ATOM   3520  C   PRO A 914     -26.861  26.274  43.868  1.00 60.31           C
ATOM   3521  O   PRO A 914     -27.327  26.050  42.752  1.00 58.94           O
ATOM   3522  CB  PRO A 914     -24.714  27.103  43.116  1.00 56.41           C
ATOM   3523  CG  PRO A 914     -23.520  26.440  42.756  1.00 55.37           C
ATOM   3524  CD  PRO A 914     -23.852  25.008  42.677  1.00 55.71           C
ATOM   3525  HA  PRO A 914     -25.097  26.386  45.131  1.00  0.00           H
ATOM   3526  HB2 PRO A 914     -25.281  27.271  42.199  1.00  0.00           H
ATOM   3527  HB3 PRO A 914     -24.520  28.085  43.551  1.00  0.00           H
ATOM   3528  HG2 PRO A 914     -23.102  26.842  41.838  1.00  0.00           H
ATOM   3529  HG3 PRO A 914     -22.773  26.595  43.538  1.00  0.00           H
ATOM   3530  HD2 PRO A 914     -24.239  24.736  41.694  1.00  0.00           H
ATOM   3531  HD3 PRO A 914     -22.946  24.437  42.887  1.00  0.00           H
ATOM   3532  N   TYR A 915     -27.599  26.610  44.916  1.00 63.40           N
ATOM   3533  CA  TYR A 915     -29.016  26.774  44.751  1.00 65.97           C
ATOM   3534  C   TYR A 915     -29.575  25.530  44.095  1.00 68.62           C
ATOM   3535  O   TYR A 915     -30.259  25.619  43.059  1.00 69.83           O
ATOM   3536  CB  TYR A 915     -29.234  27.945  43.835  1.00 64.35           C
ATOM   3537  CG  TYR A 915     -28.483  29.145  44.290  1.00 63.63           C
ATOM   3538  CD1 TYR A 915     -28.729  29.720  45.544  1.00 61.69           C
ATOM   3539  CD2 TYR A 915     -27.537  29.729  43.472  1.00 63.54           C
ATOM   3540  CE1 TYR A 915     -28.044  30.851  45.965  1.00 59.99           C
ATOM   3541  CE2 TYR A 915     -26.846  30.879  43.882  1.00 63.10           C
ATOM   3542  CZ  TYR A 915     -27.106  31.430  45.117  1.00 60.81           C
ATOM   3543  OH  TYR A 915     -26.412  32.563  45.443  1.00 58.67           O
ATOM   3544  H   TYR A 915     -27.177  26.782  45.817  1.00  0.00           H
ATOM   3545  HA  TYR A 915     -29.484  26.926  45.724  1.00  0.00           H
ATOM   3546  HB2 TYR A 915     -29.137  27.751  42.787  1.00  0.00           H
ATOM   3547  HB3 TYR A 915     -30.279  28.236  43.922  1.00  0.00           H
ATOM   3548  HD1 TYR A 915     -29.469  29.286  46.200  1.00  0.00           H
ATOM   3549  HD2 TYR A 915     -27.412  29.337  42.502  1.00  0.00           H
ATOM   3550  HE1 TYR A 915     -28.248  31.284  46.933  1.00  0.00           H
ATOM   3551  HE2 TYR A 915     -26.130  31.336  43.214  1.00  0.00           H
ATOM   3552  HH  TYR A 915     -25.812  32.835  44.766  1.00  0.00           H
ATOM   3553  N   ASP A 916     -29.239  24.372  44.672  1.00 71.04           N
ATOM   3554  CA  ASP A 916     -29.793  23.114  44.213  1.00 73.87           C
ATOM   3555  C   ASP A 916     -31.298  23.237  44.291  1.00 75.34           C
ATOM   3556  O   ASP A 916     -31.820  23.948  45.159  1.00 75.16           O
ATOM   3557  CB  ASP A 916     -29.340  21.952  45.091  1.00 75.35           C
ATOM   3558  CG  ASP A 916     -29.362  20.612  44.345  1.00 76.99           C
ATOM   3559  OD1 ASP A 916     -28.862  19.595  44.902  1.00 77.54           O
ATOM   3560  OD2 ASP A 916     -29.851  20.580  43.186  1.00 77.27           O1-
ATOM   3561  H   ASP A 916     -28.646  24.370  45.489  1.00  0.00           H
ATOM   3562  HA  ASP A 916     -29.462  22.998  43.178  1.00  0.00           H
ATOM   3563  HB2 ASP A 916     -28.307  22.112  45.404  1.00  0.00           H
ATOM   3564  HB3 ASP A 916     -29.925  21.872  46.009  1.00  0.00           H
ATOM   3565  N   GLY A 917     -31.998  22.584  43.372  1.00 76.65           N
ATOM   3566  CA  GLY A 917     -33.458  22.625  43.372  1.00 78.62           C
ATOM   3567  C   GLY A 917     -34.086  23.919  42.866  1.00 79.38           C
ATOM   3568  O   GLY A 917     -35.122  23.870  42.207  1.00 80.33           O
ATOM   3569  H   GLY A 917     -31.518  21.989  42.709  1.00  0.00           H
ATOM   3570  HA2 GLY A 917     -33.804  21.806  42.741  1.00  0.00           H
ATOM   3571  HA3 GLY A 917     -33.843  22.414  44.371  1.00  0.00           H
ATOM   3572  N   ILE A 918     -33.490  25.069  43.187  1.00 79.17           N
ATOM   3573  CA  ILE A 918     -33.932  26.367  42.631  1.00 79.61           C
ATOM   3574  C   ILE A 918     -33.579  26.509  41.137  1.00 80.50           C
ATOM   3575  O   ILE A 918     -32.460  26.199  40.720  1.00 80.30           O
ATOM   3576  CB  ILE A 918     -33.332  27.574  43.414  1.00 79.10           C
ATOM   3577  CG1 ILE A 918     -33.916  27.629  44.828  1.00 78.00           C
ATOM   3578  CG2 ILE A 918     -33.576  28.908  42.676  1.00 78.15           C
ATOM   3579  CD1 ILE A 918     -33.245  28.654  45.688  1.00 77.26           C
ATOM   3580  H   ILE A 918     -32.659  25.046  43.764  1.00  0.00           H
ATOM   3581  HA  ILE A 918     -34.998  26.428  42.824  1.00  0.00           H
ATOM   3582  HB  ILE A 918     -32.258  27.421  43.490  1.00  0.00           H
ATOM   3583 HG12 ILE A 918     -34.990  27.818  44.797  1.00  0.00           H
ATOM   3584 HG13 ILE A 918     -33.791  26.658  45.309  1.00  0.00           H
ATOM   3585 HG21 ILE A 918     -33.286  29.771  43.271  1.00  0.00           H
ATOM   3586 HG22 ILE A 918     -32.972  28.992  41.775  1.00  0.00           H
ATOM   3587 HG23 ILE A 918     -34.625  29.040  42.408  1.00  0.00           H
ATOM   3588 HD11 ILE A 918     -33.507  28.499  46.735  1.00  0.00           H
ATOM   3589 HD12 ILE A 918     -32.158  28.604  45.613  1.00  0.00           H
ATOM   3590 HD13 ILE A 918     -33.566  29.661  45.438  1.00  0.00           H
ATOM   3591  N   PRO A 919     -34.555  26.951  40.326  1.00 81.46           N
ATOM   3592  CA  PRO A 919     -34.277  27.209  38.908  1.00 82.17           C
ATOM   3593  C   PRO A 919     -33.534  28.525  38.676  1.00 82.17           C
ATOM   3594  O   PRO A 919     -33.714  29.510  39.404  1.00 82.63           O
ATOM   3595  CB  PRO A 919     -35.684  27.233  38.271  1.00 82.46           C
ATOM   3596  CG  PRO A 919     -36.556  26.429  39.238  1.00 82.52           C
ATOM   3597  CD  PRO A 919     -36.005  26.826  40.595  1.00 81.77           C
ATOM   3598  HA  PRO A 919     -33.715  26.372  38.487  1.00  0.00           H
ATOM   3599  HB2 PRO A 919     -36.076  28.236  38.134  1.00  0.00           H
ATOM   3600  HB3 PRO A 919     -35.676  26.777  37.281  1.00  0.00           H
ATOM   3601  HG2 PRO A 919     -37.619  26.649  39.133  1.00  0.00           H
ATOM   3602  HG3 PRO A 919     -36.411  25.360  39.071  1.00  0.00           H
ATOM   3603  HD2 PRO A 919     -36.408  27.777  40.941  1.00  0.00           H
ATOM   3604  HD3 PRO A 919     -36.294  26.047  41.298  1.00  0.00           H
ATOM   3605  N   ALA A 920     -32.707  28.529  37.635  1.00 81.66           N
ATOM   3606  CA  ALA A 920     -31.874  29.680  37.316  1.00 81.03           C
ATOM   3607  C   ALA A 920     -32.658  30.995  37.204  1.00 80.87           C
ATOM   3608  O   ALA A 920     -32.137  32.073  37.509  1.00 80.34           O
ATOM   3609  CB  ALA A 920     -31.089  29.403  36.043  1.00 80.00           C
ATOM   3610  H   ALA A 920     -32.622  27.701  37.064  1.00  0.00           H
ATOM   3611  HA  ALA A 920     -31.151  29.790  38.123  1.00  0.00           H
ATOM   3612  HB1 ALA A 920     -30.433  30.238  35.794  1.00  0.00           H
ATOM   3613  HB2 ALA A 920     -30.460  28.519  36.154  1.00  0.00           H
ATOM   3614  HB3 ALA A 920     -31.751  29.236  35.192  1.00  0.00           H
ATOM   3615  N   SER A 921     -33.914  30.887  36.788  1.00 81.34           N
ATOM   3616  CA  SER A 921     -34.777  32.047  36.525  1.00 82.37           C
ATOM   3617  C   SER A 921     -34.727  33.133  37.620  1.00 82.94           C
ATOM   3618  O   SER A 921     -34.439  34.296  37.338  1.00 82.87           O
ATOM   3619  CB  SER A 921     -36.225  31.570  36.299  1.00 81.91           C
ATOM   3620  OG  SER A 921     -36.985  32.551  35.619  1.00 81.25           O
ATOM   3621  H   SER A 921     -34.286  29.968  36.598  1.00  0.00           H
ATOM   3622  HA  SER A 921     -34.411  32.490  35.597  1.00  0.00           H
ATOM   3623  HB2 SER A 921     -36.229  30.676  35.675  1.00  0.00           H
ATOM   3624  HB3 SER A 921     -36.722  31.298  37.230  1.00  0.00           H
ATOM   3625  HG  SER A 921     -37.079  33.304  36.183  1.00  0.00           H
ATOM   3626  N   GLU A 922     -34.993  32.734  38.861  1.00 83.07           N
ATOM   3627  CA  GLU A 922     -35.122  33.671  39.997  1.00 82.68           C
ATOM   3628  C   GLU A 922     -33.867  33.948  40.808  1.00 81.52           C
ATOM   3629  O   GLU A 922     -33.913  34.705  41.767  1.00 82.20           O
ATOM   3630  CB  GLU A 922     -36.216  33.235  40.982  1.00 83.66           C
ATOM   3631  CG  GLU A 922     -36.242  31.765  41.284  1.00 85.87           C
ATOM   3632  CD  GLU A 922     -36.927  31.002  40.174  1.00 88.10           C
ATOM   3633  OE1 GLU A 922     -38.045  31.401  39.784  1.00 88.91           O
ATOM   3634  OE2 GLU A 922     -36.342  30.025  39.666  1.00 89.83           O1-
ATOM   3635  H   GLU A 922     -35.199  31.757  39.030  1.00  0.00           H
ATOM   3636  HA  GLU A 922     -35.426  34.642  39.605  1.00  0.00           H
ATOM   3637  HB2 GLU A 922     -36.154  33.757  41.936  1.00  0.00           H
ATOM   3638  HB3 GLU A 922     -37.178  33.566  40.588  1.00  0.00           H
ATOM   3639  HG2 GLU A 922     -35.238  31.376  41.458  1.00  0.00           H
ATOM   3640  HG3 GLU A 922     -36.808  31.586  42.198  1.00  0.00           H
ATOM   3641  N   ILE A 923     -32.751  33.339  40.454  1.00 79.68           N
ATOM   3642  CA  ILE A 923     -31.528  33.616  41.188  1.00 77.97           C
ATOM   3643  C   ILE A 923     -31.375  35.112  41.518  1.00 77.10           C
ATOM   3644  O   ILE A 923     -30.953  35.471  42.611  1.00 77.28           O
ATOM   3645  CB  ILE A 923     -30.288  33.047  40.449  1.00 77.87           C
ATOM   3646  CG1 ILE A 923     -30.386  31.517  40.308  1.00 77.11           C
ATOM   3647  CG2 ILE A 923     -28.974  33.445  41.129  1.00 76.39           C
ATOM   3648  CD1 ILE A 923     -30.415  30.758  41.606  1.00 76.90           C
ATOM   3649  H   ILE A 923     -32.731  32.719  39.656  1.00  0.00           H
ATOM   3650  HA  ILE A 923     -31.620  33.126  42.157  1.00  0.00           H
ATOM   3651  HB  ILE A 923     -30.282  33.470  39.445  1.00  0.00           H
ATOM   3652 HG12 ILE A 923     -31.310  31.268  39.794  1.00  0.00           H
ATOM   3653 HG13 ILE A 923     -29.609  31.178  39.639  1.00  0.00           H
ATOM   3654 HG21 ILE A 923     -28.131  32.892  40.718  1.00  0.00           H
ATOM   3655 HG22 ILE A 923     -28.747  34.502  40.988  1.00  0.00           H
ATOM   3656 HG23 ILE A 923     -28.996  33.253  42.202  1.00  0.00           H
ATOM   3657 HD11 ILE A 923     -30.445  29.683  41.471  1.00  0.00           H
ATOM   3658 HD12 ILE A 923     -29.541  30.981  42.212  1.00  0.00           H
ATOM   3659 HD13 ILE A 923     -31.295  30.997  42.200  1.00  0.00           H
ATOM   3660  N   SER A 924     -31.753  35.987  40.599  1.00 76.38           N
ATOM   3661  CA  SER A 924     -31.637  37.420  40.860  1.00 76.11           C
ATOM   3662  C   SER A 924     -32.605  37.885  41.929  1.00 75.96           C
ATOM   3663  O   SER A 924     -32.269  38.731  42.756  1.00 74.82           O
ATOM   3664  CB  SER A 924     -31.854  38.223  39.583  1.00 76.27           C
ATOM   3665  OG  SER A 924     -33.049  37.821  38.946  1.00 77.13           O
ATOM   3666  H   SER A 924     -32.134  35.680  39.715  1.00  0.00           H
ATOM   3667  HA  SER A 924     -30.623  37.637  41.197  1.00  0.00           H
ATOM   3668  HB2 SER A 924     -31.890  39.294  39.787  1.00  0.00           H
ATOM   3669  HB3 SER A 924     -31.024  38.063  38.894  1.00  0.00           H
ATOM   3670  HG  SER A 924     -33.159  38.331  38.158  1.00  0.00           H
ATOM   3671  N   SER A 925     -33.812  37.322  41.896  1.00 76.86           N
ATOM   3672  CA  SER A 925     -34.865  37.694  42.837  1.00 77.24           C
ATOM   3673  C   SER A 925     -34.269  37.560  44.218  1.00 77.36           C
ATOM   3674  O   SER A 925     -34.010  38.569  44.914  1.00 77.61           O
ATOM   3675  CB  SER A 925     -36.095  36.770  42.712  1.00 76.59           C
ATOM   3676  OG  SER A 925     -36.286  36.321  41.384  1.00 75.83           O
ATOM   3677  H   SER A 925     -34.019  36.609  41.209  1.00  0.00           H
ATOM   3678  HA  SER A 925     -35.153  38.729  42.643  1.00  0.00           H
ATOM   3679  HB2 SER A 925     -36.060  35.866  43.319  1.00  0.00           H
ATOM   3680  HB3 SER A 925     -36.991  37.306  43.026  1.00  0.00           H
ATOM   3681  HG  SER A 925     -37.056  35.773  41.356  1.00  0.00           H
ATOM   3682  N   ILE A 926     -34.014  36.294  44.573  1.00 77.08           N
ATOM   3683  CA  ILE A 926     -33.559  35.946  45.897  1.00 76.43           C
ATOM   3684  C   ILE A 926     -32.270  36.621  46.223  1.00 76.46           C
ATOM   3685  O   ILE A 926     -32.001  36.904  47.378  1.00 77.02           O
ATOM   3686  CB  ILE A 926     -33.399  34.441  46.096  1.00 75.39           C
ATOM   3687  CG1 ILE A 926     -32.466  33.831  45.040  1.00 73.57           C
ATOM   3688  CG2 ILE A 926     -34.782  33.759  46.088  1.00 76.37           C
ATOM   3689  CD1 ILE A 926     -32.210  32.373  45.296  1.00 73.35           C
ATOM   3690  H   ILE A 926     -34.189  35.548  43.913  1.00  0.00           H
ATOM   3691  HA  ILE A 926     -34.253  36.225  46.663  1.00  0.00           H
ATOM   3692  HB  ILE A 926     -32.977  34.262  47.082  1.00  0.00           H
ATOM   3693 HG12 ILE A 926     -32.877  33.949  44.040  1.00  0.00           H
ATOM   3694 HG13 ILE A 926     -31.492  34.317  45.039  1.00  0.00           H
ATOM   3695 HG21 ILE A 926     -34.721  32.716  46.397  1.00  0.00           H
ATOM   3696 HG22 ILE A 926     -35.467  34.246  46.783  1.00  0.00           H
ATOM   3697 HG23 ILE A 926     -35.239  33.788  45.098  1.00  0.00           H
ATOM   3698 HD11 ILE A 926     -31.431  31.998  44.632  1.00  0.00           H
ATOM   3699 HD12 ILE A 926     -31.885  32.191  46.321  1.00  0.00           H
ATOM   3700 HD13 ILE A 926     -33.102  31.782  45.104  1.00  0.00           H
ATOM   3701  N   LEU A 927     -31.486  36.911  45.202  1.00 75.96           N
ATOM   3702  CA  LEU A 927     -30.240  37.579  45.437  1.00 75.59           C
ATOM   3703  C   LEU A 927     -30.490  38.972  46.002  1.00 75.52           C
ATOM   3704  O   LEU A 927     -29.784  39.437  46.911  1.00 75.74           O
ATOM   3705  CB  LEU A 927     -29.438  37.636  44.154  1.00 75.32           C
ATOM   3706  CG  LEU A 927     -27.990  37.171  44.298  1.00 74.67           C
ATOM   3707  CD1 LEU A 927     -27.903  35.752  44.875  1.00 73.34           C
ATOM   3708  CD2 LEU A 927     -27.342  37.233  42.923  1.00 74.11           C
ATOM   3709  H   LEU A 927     -31.744  36.655  44.259  1.00  0.00           H
ATOM   3710  HA  LEU A 927     -29.708  37.035  46.215  1.00  0.00           H
ATOM   3711  HB2 LEU A 927     -29.919  37.265  43.281  1.00  0.00           H
ATOM   3712  HB3 LEU A 927     -29.351  38.686  43.880  1.00  0.00           H
ATOM   3713  HG  LEU A 927     -27.452  37.847  44.963  1.00  0.00           H
ATOM   3714 HD11 LEU A 927     -26.908  35.331  44.735  1.00  0.00           H
ATOM   3715 HD12 LEU A 927     -28.095  35.709  45.946  1.00  0.00           H
ATOM   3716 HD13 LEU A 927     -28.605  35.080  44.379  1.00  0.00           H
ATOM   3717 HD21 LEU A 927     -26.334  36.826  42.921  1.00  0.00           H
ATOM   3718 HD22 LEU A 927     -27.907  36.648  42.196  1.00  0.00           H
ATOM   3719 HD23 LEU A 927     -27.273  38.237  42.541  1.00  0.00           H
ATOM   3720  N   GLU A 928     -31.464  39.653  45.441  1.00 75.60           N
ATOM   3721  CA  GLU A 928     -31.838  40.960  45.944  1.00 76.51           C
ATOM   3722  C   GLU A 928     -32.470  40.931  47.314  1.00 75.12           C
ATOM   3723  O   GLU A 928     -32.211  41.778  48.131  1.00 74.41           O
ATOM   3724  CB  GLU A 928     -32.737  41.674  44.953  1.00 78.62           C
ATOM   3725  CG  GLU A 928     -32.122  41.777  43.592  1.00 82.45           C
ATOM   3726  CD  GLU A 928     -32.717  42.875  42.771  1.00 85.26           C
ATOM   3727  OE1 GLU A 928     -33.956  42.920  42.659  1.00 86.93           O
ATOM   3728  OE2 GLU A 928     -31.946  43.696  42.234  1.00 86.03           O1-
ATOM   3729  H   GLU A 928     -32.000  39.248  44.683  1.00  0.00           H
ATOM   3730  HA  GLU A 928     -30.929  41.561  46.029  1.00  0.00           H
ATOM   3731  HB2 GLU A 928     -33.702  41.173  44.874  1.00  0.00           H
ATOM   3732  HB3 GLU A 928     -32.951  42.673  45.339  1.00  0.00           H
ATOM   3733  HG2 GLU A 928     -31.061  41.948  43.704  1.00  0.00           H
ATOM   3734  HG3 GLU A 928     -32.247  40.908  42.989  1.00  0.00           H
ATOM   3735  N   LYS A 929     -33.319  39.953  47.545  1.00 73.99           N
ATOM   3736  CA  LYS A 929     -34.003  39.829  48.791  1.00 72.89           C
ATOM   3737  C   LYS A 929     -33.003  39.567  49.890  1.00 72.11           C
ATOM   3738  O   LYS A 929     -33.320  39.655  51.041  1.00 73.42           O
ATOM   3739  CB  LYS A 929     -35.019  38.719  48.701  1.00 73.15           C
ATOM   3740  CG  LYS A 929     -35.558  38.536  47.315  1.00 74.33           C
ATOM   3741  CD  LYS A 929     -36.976  39.017  47.202  1.00 74.60           C
ATOM   3742  CE  LYS A 929     -37.492  38.869  45.799  1.00 75.68           C
ATOM   3743  NZ  LYS A 929     -37.099  39.990  44.915  1.00 75.08           N1+
ATOM   3744  H   LYS A 929     -33.497  39.270  46.821  1.00  0.00           H
ATOM   3745  HA  LYS A 929     -34.526  40.765  48.999  1.00  0.00           H
ATOM   3746  HB2 LYS A 929     -34.551  37.771  48.975  1.00  0.00           H
ATOM   3747  HB3 LYS A 929     -35.811  38.867  49.437  1.00  0.00           H
ATOM   3748  HG2 LYS A 929     -35.200  39.221  46.584  1.00  0.00           H
ATOM   3749  HG3 LYS A 929     -35.616  37.514  46.992  1.00  0.00           H
ATOM   3750  HD2 LYS A 929     -37.600  38.418  47.867  1.00  0.00           H
ATOM   3751  HD3 LYS A 929     -37.075  40.050  47.543  1.00  0.00           H
ATOM   3752  HE2 LYS A 929     -37.187  37.920  45.357  1.00  0.00           H
ATOM   3753  HE3 LYS A 929     -38.582  38.856  45.824  1.00  0.00           H
ATOM   3754  HZ1 LYS A 929     -37.503  39.862  43.998  1.00  0.00           H
ATOM   3755  HZ2 LYS A 929     -37.427  40.862  45.305  1.00  0.00           H
ATOM   3756  HZ3 LYS A 929     -36.092  40.020  44.835  1.00  0.00           H
ATOM   3757  N   GLY A 930     -31.793  39.201  49.535  1.00 70.50           N
ATOM   3758  CA  GLY A 930     -30.762  39.016  50.523  1.00 67.33           C
ATOM   3759  C   GLY A 930     -30.387  37.593  50.788  1.00 65.73           C
ATOM   3760  O   GLY A 930     -29.560  37.345  51.643  1.00 65.69           O
ATOM   3761  H   GLY A 930     -31.557  39.112  48.557  1.00  0.00           H
ATOM   3762  HA2 GLY A 930     -29.872  39.505  50.126  1.00  0.00           H
ATOM   3763  HA3 GLY A 930     -30.956  39.518  51.473  1.00  0.00           H
ATOM   3764  N   GLU A 931     -30.976  36.660  50.072  1.00 64.85           N
ATOM   3765  CA  GLU A 931     -30.666  35.267  50.308  1.00 64.14           C
ATOM   3766  C   GLU A 931     -29.317  34.963  49.772  1.00 62.09           C
ATOM   3767  O   GLU A 931     -28.788  35.729  49.028  1.00 62.25           O
ATOM   3768  CB  GLU A 931     -31.710  34.310  49.770  1.00 66.37           C
ATOM   3769  CG  GLU A 931     -31.659  32.986  50.498  1.00 71.65           C
ATOM   3770  CD  GLU A 931     -32.935  32.207  50.430  1.00 76.72           C
ATOM   3771  OE1 GLU A 931     -32.863  30.970  50.416  1.00 76.23           O
ATOM   3772  OE2 GLU A 931     -34.006  32.825  50.400  1.00 76.16           O1-
ATOM   3773  H   GLU A 931     -31.630  36.905  49.340  1.00  0.00           H
ATOM   3774  HA  GLU A 931     -30.633  35.130  51.392  1.00  0.00           H
ATOM   3775  HB2 GLU A 931     -32.684  34.790  49.879  1.00  0.00           H
ATOM   3776  HB3 GLU A 931     -31.566  34.152  48.702  1.00  0.00           H
ATOM   3777  HG2 GLU A 931     -30.858  32.362  50.102  1.00  0.00           H
ATOM   3778  HG3 GLU A 931     -31.455  33.123  51.560  1.00  0.00           H
ATOM   3779  N   ARG A 932     -28.729  33.869  50.207  1.00 60.06           N
ATOM   3780  CA  ARG A 932     -27.338  33.611  49.868  1.00 58.50           C
ATOM   3781  C   ARG A 932     -27.046  32.176  50.199  1.00 57.52           C
ATOM   3782  O   ARG A 932     -27.800  31.550  50.951  1.00 58.68           O
ATOM   3783  CB  ARG A 932     -26.425  34.538  50.676  1.00 57.26           C
ATOM   3784  CG  ARG A 932     -25.373  35.245  49.892  1.00 55.27           C
ATOM   3785  CD  ARG A 932     -25.979  36.025  48.793  1.00 54.47           C
ATOM   3786  NE  ARG A 932     -25.575  37.419  48.845  1.00 53.24           N
ATOM   3787  CZ  ARG A 932     -26.294  38.420  48.338  1.00 52.83           C
ATOM   3788  NH1 ARG A 932     -25.856  39.675  48.427  1.00 52.22           N
ATOM   3789  NH2 ARG A 932     -27.452  38.159  47.738  1.00 52.61           N1+
ATOM   3790  H   ARG A 932     -29.202  33.236  50.837  1.00  0.00           H
ATOM   3791  HA  ARG A 932     -27.204  33.717  48.790  1.00  0.00           H
ATOM   3792  HB2 ARG A 932     -27.001  35.284  51.227  1.00  0.00           H
ATOM   3793  HB3 ARG A 932     -25.923  33.987  51.474  1.00  0.00           H
ATOM   3794  HG2 ARG A 932     -24.750  35.851  50.552  1.00  0.00           H
ATOM   3795  HG3 ARG A 932     -24.757  34.488  49.422  1.00  0.00           H
ATOM   3796  HD2 ARG A 932     -26.194  35.569  47.826  1.00  0.00           H
ATOM   3797  HD3 ARG A 932     -26.830  36.389  49.297  1.00  0.00           H
ATOM   3798  HE  ARG A 932     -24.675  37.625  49.256  1.00  0.00           H
ATOM   3799 HH11 ARG A 932     -24.882  39.835  48.666  1.00  0.00           H
ATOM   3800 HH12 ARG A 932     -26.418  40.440  48.086  1.00  0.00           H
ATOM   3801 HH21 ARG A 932     -27.808  37.212  47.742  1.00  0.00           H
ATOM   3802 HH22 ARG A 932     -28.044  38.899  47.380  1.00  0.00           H
ATOM   3803  N   LEU A 933     -25.965  31.648  49.635  1.00 56.01           N
ATOM   3804  CA  LEU A 933     -25.596  30.271  49.923  1.00 55.63           C
ATOM   3805  C   LEU A 933     -25.267  30.145  51.391  1.00 55.45           C
ATOM   3806  O   LEU A 933     -24.639  31.034  51.965  1.00 55.54           O
ATOM   3807  CB  LEU A 933     -24.426  29.819  49.071  1.00 55.29           C
ATOM   3808  CG  LEU A 933     -24.884  29.638  47.621  1.00 55.34           C
ATOM   3809  CD1 LEU A 933     -23.677  29.567  46.726  1.00 53.34           C
ATOM   3810  CD2 LEU A 933     -25.793  28.379  47.483  1.00 54.90           C
ATOM   3811  H   LEU A 933     -25.380  32.197  49.022  1.00  0.00           H
ATOM   3812  HA  LEU A 933     -26.484  29.691  49.688  1.00  0.00           H
ATOM   3813  HB2 LEU A 933     -23.640  30.562  49.128  1.00  0.00           H
ATOM   3814  HB3 LEU A 933     -24.000  28.887  49.441  1.00  0.00           H
ATOM   3815  HG  LEU A 933     -25.455  30.510  47.304  1.00  0.00           H
ATOM   3816 HD11 LEU A 933     -23.976  29.452  45.684  1.00  0.00           H
ATOM   3817 HD12 LEU A 933     -23.076  30.474  46.791  1.00  0.00           H
ATOM   3818 HD13 LEU A 933     -23.036  28.723  46.981  1.00  0.00           H
ATOM   3819 HD21 LEU A 933     -26.011  28.204  46.431  1.00  0.00           H
ATOM   3820 HD22 LEU A 933     -25.302  27.486  47.868  1.00  0.00           H
ATOM   3821 HD23 LEU A 933     -26.757  28.481  47.978  1.00  0.00           H
ATOM   3822  N   PRO A 934     -25.724  29.060  52.020  1.00 55.09           N
ATOM   3823  CA  PRO A 934     -25.591  28.863  53.458  1.00 54.98           C
ATOM   3824  C   PRO A 934     -24.146  28.613  53.843  1.00 54.90           C
ATOM   3825  O   PRO A 934     -23.279  28.450  52.994  1.00 55.74           O
ATOM   3826  CB  PRO A 934     -26.396  27.594  53.687  1.00 54.87           C
ATOM   3827  CG  PRO A 934     -26.225  26.841  52.409  1.00 55.27           C
ATOM   3828  CD  PRO A 934     -26.359  27.906  51.372  1.00 55.12           C
ATOM   3829  HA  PRO A 934     -25.999  29.705  54.021  1.00  0.00           H
ATOM   3830  HB2 PRO A 934     -26.086  27.011  54.556  1.00  0.00           H
ATOM   3831  HB3 PRO A 934     -27.448  27.846  53.831  1.00  0.00           H
ATOM   3832  HG2 PRO A 934     -25.236  26.381  52.366  1.00  0.00           H
ATOM   3833  HG3 PRO A 934     -26.964  26.048  52.287  1.00  0.00           H
ATOM   3834  HD2 PRO A 934     -25.867  27.601  50.448  1.00  0.00           H
ATOM   3835  HD3 PRO A 934     -27.408  28.124  51.164  1.00  0.00           H
ATOM   3836  N   GLN A 935     -23.898  28.549  55.128  1.00 54.67           N
ATOM   3837  CA  GLN A 935     -22.583  28.223  55.633  1.00 54.15           C
ATOM   3838  C   GLN A 935     -22.351  26.724  55.483  1.00 54.27           C
ATOM   3839  O   GLN A 935     -23.128  25.910  55.991  1.00 54.01           O
ATOM   3840  CB  GLN A 935     -22.547  28.594  57.097  1.00 54.31           C
ATOM   3841  CG  GLN A 935     -21.226  28.657  57.779  1.00 52.40           C
ATOM   3842  CD  GLN A 935     -21.381  29.269  59.168  1.00 51.25           C
ATOM   3843  OE1 GLN A 935     -22.607  29.584  59.558  1.00 54.66           O
ATOM   3844  NE2 GLN A 935     -20.411  29.453  59.872  1.00 49.20           N
ATOM   3845  H   GLN A 935     -24.648  28.681  55.791  1.00  0.00           H
ATOM   3846  HA  GLN A 935     -21.853  28.860  55.142  1.00  0.00           H
ATOM   3847  HB2 GLN A 935     -23.036  29.564  57.175  1.00  0.00           H
ATOM   3848  HB3 GLN A 935     -23.203  27.923  57.657  1.00  0.00           H
ATOM   3849  HG2 GLN A 935     -20.840  27.644  57.901  1.00  0.00           H
ATOM   3850  HG3 GLN A 935     -20.478  29.172  57.198  1.00  0.00           H
ATOM   3851 HE21 GLN A 935     -19.494  29.173  59.554  1.00  0.00           H
ATOM   3852 HE22 GLN A 935     -20.535  29.850  60.791  1.00  0.00           H
ATOM   3853  N   PRO A 936     -21.280  26.355  54.773  1.00 54.32           N
ATOM   3854  CA  PRO A 936     -20.828  24.979  54.669  1.00 54.16           C
ATOM   3855  C   PRO A 936     -20.568  24.427  56.064  1.00 53.95           C
ATOM   3856  O   PRO A 936     -19.894  25.079  56.864  1.00 53.37           O
ATOM   3857  CB  PRO A 936     -19.514  25.108  53.900  1.00 53.95           C
ATOM   3858  CG  PRO A 936     -19.724  26.299  53.090  1.00 54.62           C
ATOM   3859  CD  PRO A 936     -20.404  27.248  54.008  1.00 54.61           C
ATOM   3860  HA  PRO A 936     -21.553  24.439  54.065  1.00  0.00           H
ATOM   3861  HB2 PRO A 936     -18.662  25.218  54.562  1.00  0.00           H
ATOM   3862  HB3 PRO A 936     -19.320  24.230  53.282  1.00  0.00           H
ATOM   3863  HG2 PRO A 936     -18.757  26.661  52.750  1.00  0.00           H
ATOM   3864  HG3 PRO A 936     -20.343  26.063  52.225  1.00  0.00           H
ATOM   3865  HD2 PRO A 936     -19.697  27.747  54.672  1.00  0.00           H
ATOM   3866  HD3 PRO A 936     -20.925  27.998  53.421  1.00  0.00           H
ATOM   3867  N   PRO A 937     -21.092  23.226  56.355  1.00 53.91           N
ATOM   3868  CA  PRO A 937     -20.956  22.633  57.673  1.00 54.02           C
ATOM   3869  C   PRO A 937     -19.534  22.607  58.170  1.00 54.50           C
ATOM   3870  O   PRO A 937     -19.299  22.779  59.344  1.00 55.20           O
ATOM   3871  CB  PRO A 937     -21.435  21.216  57.446  1.00 53.55           C
ATOM   3872  CG  PRO A 937     -22.497  21.387  56.440  1.00 54.26           C
ATOM   3873  CD  PRO A 937     -21.873  22.352  55.464  1.00 53.90           C
ATOM   3874  HA  PRO A 937     -21.603  23.162  58.376  1.00  0.00           H
ATOM   3875  HB2 PRO A 937     -20.684  20.532  57.065  1.00  0.00           H
ATOM   3876  HB3 PRO A 937     -21.824  20.775  58.365  1.00  0.00           H
ATOM   3877  HG2 PRO A 937     -22.790  20.448  55.970  1.00  0.00           H
ATOM   3878  HG3 PRO A 937     -23.386  21.827  56.897  1.00  0.00           H
ATOM   3879  HD2 PRO A 937     -21.214  21.849  54.754  1.00  0.00           H
ATOM   3880  HD3 PRO A 937     -22.664  22.869  54.921  1.00  0.00           H
ATOM   3881  N   ILE A 938     -18.604  22.442  57.272  1.00 55.16           N
ATOM   3882  CA  ILE A 938     -17.197  22.391  57.549  1.00 55.83           C
ATOM   3883  C   ILE A 938     -16.585  23.690  57.935  1.00 56.84           C
ATOM   3884  O   ILE A 938     -15.476  23.734  58.405  1.00 56.91           O
ATOM   3885  CB  ILE A 938     -16.535  22.076  56.270  1.00 56.41           C
ATOM   3886  CG1 ILE A 938     -16.881  20.664  55.917  1.00 56.20           C
ATOM   3887  CG2 ILE A 938     -15.090  22.321  56.347  1.00 56.97           C
ATOM   3888  CD1 ILE A 938     -18.247  20.368  56.296  1.00 56.60           C
ATOM   3889  H   ILE A 938     -18.884  22.310  56.312  1.00  0.00           H
ATOM   3890  HA  ILE A 938     -16.970  21.657  58.326  1.00  0.00           H
ATOM   3891  HB  ILE A 938     -16.931  22.716  55.475  1.00  0.00           H
ATOM   3892 HG12 ILE A 938     -16.737  20.527  54.846  1.00  0.00           H
ATOM   3893 HG13 ILE A 938     -16.210  19.968  56.424  1.00  0.00           H
ATOM   3894 HG21 ILE A 938     -14.615  21.811  55.508  1.00  0.00           H
ATOM   3895 HG22 ILE A 938     -14.877  23.341  56.137  1.00  0.00           H
ATOM   3896 HG23 ILE A 938     -14.572  21.915  57.217  1.00  0.00           H
ATOM   3897 HD11 ILE A 938     -18.369  19.354  55.913  1.00  0.00           H
ATOM   3898 HD12 ILE A 938     -18.455  20.125  57.344  1.00  0.00           H
ATOM   3899 HD13 ILE A 938     -19.025  20.832  55.680  1.00  0.00           H
ATOM   3900  N   CYS A 939     -17.296  24.764  57.667  1.00 58.53           N
ATOM   3901  CA  CYS A 939     -16.737  26.103  57.717  1.00 58.85           C
ATOM   3902  C   CYS A 939     -16.906  26.893  58.985  1.00 59.27           C
ATOM   3903  O   CYS A 939     -17.981  26.983  59.521  1.00 59.76           O
ATOM   3904  CB  CYS A 939     -17.357  26.926  56.602  1.00 58.46           C
ATOM   3905  SG  CYS A 939     -16.549  26.800  54.992  1.00 58.78           S
ATOM   3906  H   CYS A 939     -18.240  24.662  57.315  1.00  0.00           H
ATOM   3907  HA  CYS A 939     -15.667  26.065  57.513  1.00  0.00           H
ATOM   3908  HB2 CYS A 939     -18.426  26.812  56.496  1.00  0.00           H
ATOM   3909  HB3 CYS A 939     -17.244  27.990  56.822  1.00  0.00           H
ATOM   3910  HG  CYS A 939     -15.328  27.139  55.417  1.00  0.00           H
ATOM   3911  N   THR A 940     -15.830  27.492  59.453  1.00 59.84           N
ATOM   3912  CA  THR A 940     -15.941  28.419  60.555  1.00 60.66           C
ATOM   3913  C   THR A 940     -16.470  29.728  59.982  1.00 60.71           C
ATOM   3914  O   THR A 940     -16.346  29.982  58.774  1.00 61.23           O
ATOM   3915  CB  THR A 940     -14.593  28.719  61.178  1.00 60.86           C
ATOM   3916  OG1 THR A 940     -13.728  29.241  60.169  1.00 61.86           O
ATOM   3917  CG2 THR A 940     -13.996  27.486  61.796  1.00 60.60           C
ATOM   3918  H   THR A 940     -14.939  27.388  58.990  1.00  0.00           H
ATOM   3919  HA  THR A 940     -16.617  28.047  61.329  1.00  0.00           H
ATOM   3920  HB  THR A 940     -14.688  29.483  61.952  1.00  0.00           H
ATOM   3921  HG1 THR A 940     -13.403  28.511  59.656  1.00  0.00           H
ATOM   3922 HG21 THR A 940     -12.961  27.641  62.093  1.00  0.00           H
ATOM   3923 HG22 THR A 940     -14.539  27.245  62.710  1.00  0.00           H
ATOM   3924 HG23 THR A 940     -14.066  26.590  61.183  1.00  0.00           H
ATOM   3925  N   ILE A 941     -17.031  30.571  60.847  1.00 60.01           N
ATOM   3926  CA  ILE A 941     -17.456  31.884  60.432  1.00 59.28           C
ATOM   3927  C   ILE A 941     -16.362  32.623  59.700  1.00 57.44           C
ATOM   3928  O   ILE A 941     -16.641  33.329  58.740  1.00 56.85           O
ATOM   3929  CB  ILE A 941     -17.841  32.720  61.609  1.00 61.05           C
ATOM   3930  CG1 ILE A 941     -19.021  32.096  62.283  1.00 63.37           C
ATOM   3931  CG2 ILE A 941     -18.310  34.088  61.155  1.00 62.62           C
ATOM   3932  CD1 ILE A 941     -19.568  33.006  63.336  1.00 66.98           C
ATOM   3933  H   ILE A 941     -17.102  30.325  61.824  1.00  0.00           H
ATOM   3934  HA  ILE A 941     -18.306  31.771  59.755  1.00  0.00           H
ATOM   3935  HB  ILE A 941     -17.012  32.823  62.313  1.00  0.00           H
ATOM   3936 HG12 ILE A 941     -19.813  31.852  61.572  1.00  0.00           H
ATOM   3937 HG13 ILE A 941     -18.728  31.158  62.757  1.00  0.00           H
ATOM   3938 HG21 ILE A 941     -18.567  34.766  61.966  1.00  0.00           H
ATOM   3939 HG22 ILE A 941     -17.517  34.648  60.671  1.00  0.00           H
ATOM   3940 HG23 ILE A 941     -19.153  34.031  60.465  1.00  0.00           H
ATOM   3941 HD11 ILE A 941     -20.196  32.433  64.019  1.00  0.00           H
ATOM   3942 HD12 ILE A 941     -18.784  33.462  63.943  1.00  0.00           H
ATOM   3943 HD13 ILE A 941     -20.216  33.786  62.935  1.00  0.00           H
ATOM   3944  N   ASP A 942     -15.124  32.473  60.156  1.00 55.72           N
ATOM   3945  CA  ASP A 942     -14.026  33.225  59.561  1.00 54.15           C
ATOM   3946  C   ASP A 942     -13.928  32.960  58.049  1.00 52.40           C
ATOM   3947  O   ASP A 942     -13.655  33.883  57.256  1.00 52.15           O
ATOM   3948  CB  ASP A 942     -12.711  32.865  60.227  1.00 56.87           C
ATOM   3949  CG  ASP A 942     -12.727  33.093  61.722  1.00 60.55           C
ATOM   3950  OD1 ASP A 942     -13.394  32.296  62.454  1.00 62.91           O
ATOM   3951  OD2 ASP A 942     -12.030  34.046  62.159  1.00 60.99           O1-
ATOM   3952  H   ASP A 942     -14.933  31.902  60.969  1.00  0.00           H
ATOM   3953  HA  ASP A 942     -14.217  34.290  59.708  1.00  0.00           H
ATOM   3954  HB2 ASP A 942     -12.493  31.812  60.054  1.00  0.00           H
ATOM   3955  HB3 ASP A 942     -11.892  33.437  59.789  1.00  0.00           H
ATOM   3956  N   VAL A 943     -14.158  31.702  57.651  1.00 48.84           N
ATOM   3957  CA  VAL A 943     -13.999  31.357  56.243  1.00 46.24           C
ATOM   3958  C   VAL A 943     -15.284  31.689  55.503  1.00 44.77           C
ATOM   3959  O   VAL A 943     -15.279  32.229  54.380  1.00 43.90           O
ATOM   3960  CB  VAL A 943     -13.568  29.854  56.037  1.00 46.50           C
ATOM   3961  CG1 VAL A 943     -13.340  29.508  54.536  1.00 45.57           C
ATOM   3962  CG2 VAL A 943     -12.308  29.573  56.786  1.00 44.84           C
ATOM   3963  H   VAL A 943     -14.395  30.984  58.322  1.00  0.00           H
ATOM   3964  HA  VAL A 943     -13.204  31.960  55.797  1.00  0.00           H
ATOM   3965  HB  VAL A 943     -14.353  29.209  56.437  1.00  0.00           H
ATOM   3966 HG11 VAL A 943     -12.930  28.504  54.426  1.00  0.00           H
ATOM   3967 HG12 VAL A 943     -14.270  29.538  53.967  1.00  0.00           H
ATOM   3968 HG13 VAL A 943     -12.645  30.209  54.074  1.00  0.00           H
ATOM   3969 HG21 VAL A 943     -12.242  28.506  57.000  1.00  0.00           H
ATOM   3970 HG22 VAL A 943     -11.447  29.799  56.173  1.00  0.00           H
ATOM   3971 HG23 VAL A 943     -12.241  30.096  57.736  1.00  0.00           H
ATOM   3972  N   TYR A 944     -16.396  31.375  56.114  1.00 42.64           N
ATOM   3973  CA  TYR A 944     -17.675  31.631  55.522  1.00 41.19           C
ATOM   3974  C   TYR A 944     -17.910  33.084  55.357  1.00 41.50           C
ATOM   3975  O   TYR A 944     -18.610  33.500  54.498  1.00 40.44           O
ATOM   3976  CB  TYR A 944     -18.758  31.058  56.369  1.00 40.14           C
ATOM   3977  CG  TYR A 944     -20.082  31.287  55.781  1.00 38.87           C
ATOM   3978  CD1 TYR A 944     -20.260  31.221  54.459  1.00 36.27           C
ATOM   3979  CD2 TYR A 944     -21.155  31.566  56.547  1.00 39.19           C
ATOM   3980  CE1 TYR A 944     -21.454  31.412  53.929  1.00 35.65           C
ATOM   3981  CE2 TYR A 944     -22.354  31.768  56.004  1.00 36.10           C
ATOM   3982  CZ  TYR A 944     -22.491  31.682  54.701  1.00 35.46           C
ATOM   3983  OH  TYR A 944     -23.684  31.878  54.136  1.00 35.13           O
ATOM   3984  H   TYR A 944     -16.359  30.943  57.029  1.00  0.00           H
ATOM   3985  HA  TYR A 944     -17.631  31.149  54.546  1.00  0.00           H
ATOM   3986  HB2 TYR A 944     -18.596  29.984  56.462  1.00  0.00           H
ATOM   3987  HB3 TYR A 944     -18.719  31.467  57.381  1.00  0.00           H
ATOM   3988  HD1 TYR A 944     -19.472  30.958  53.779  1.00  0.00           H
ATOM   3989  HD2 TYR A 944     -21.048  31.648  57.618  1.00  0.00           H
ATOM   3990  HE1 TYR A 944     -21.576  31.333  52.859  1.00  0.00           H
ATOM   3991  HE2 TYR A 944     -23.202  31.998  56.633  1.00  0.00           H
ATOM   3992  HH  TYR A 944     -23.753  31.612  53.226  1.00  0.00           H
ATOM   3993  N   MET A 945     -17.366  33.849  56.269  1.00 42.65           N
ATOM   3994  CA  MET A 945     -17.507  35.272  56.294  1.00 43.97           C
ATOM   3995  C   MET A 945     -16.879  35.879  55.072  1.00 43.58           C
ATOM   3996  O   MET A 945     -17.252  36.935  54.650  1.00 44.92           O
ATOM   3997  CB  MET A 945     -16.922  35.824  57.580  1.00 46.28           C
ATOM   3998  CG  MET A 945     -17.315  37.232  57.885  1.00 51.80           C
ATOM   3999  SD  MET A 945     -18.995  37.415  58.416  1.00 56.93           S
ATOM   4000  CE  MET A 945     -18.814  37.105  60.113  1.00 56.68           C
ATOM   4001  H   MET A 945     -16.845  33.422  57.026  1.00  0.00           H
ATOM   4002  HA  MET A 945     -18.573  35.501  56.273  1.00  0.00           H
ATOM   4003  HB2 MET A 945     -17.390  35.349  58.426  1.00  0.00           H
ATOM   4004  HB3 MET A 945     -15.841  35.685  57.634  1.00  0.00           H
ATOM   4005  HG2 MET A 945     -16.655  37.650  58.646  1.00  0.00           H
ATOM   4006  HG3 MET A 945     -17.186  37.867  57.015  1.00  0.00           H
ATOM   4007  HE1 MET A 945     -19.578  36.406  60.448  1.00  0.00           H
ATOM   4008  HE2 MET A 945     -17.825  36.734  60.367  1.00  0.00           H
ATOM   4009  HE3 MET A 945     -18.956  38.036  60.662  1.00  0.00           H
ATOM   4010  N   ILE A 946     -15.891  35.205  54.529  1.00 42.58           N
ATOM   4011  CA  ILE A 946     -15.254  35.633  53.307  1.00 42.13           C
ATOM   4012  C   ILE A 946     -16.150  35.308  52.111  1.00 43.33           C
ATOM   4013  O   ILE A 946     -16.257  36.103  51.165  1.00 44.05           O
ATOM   4014  CB  ILE A 946     -13.900  34.969  53.127  1.00 42.10           C
ATOM   4015  CG1 ILE A 946     -13.046  35.145  54.383  1.00 41.01           C
ATOM   4016  CG2 ILE A 946     -13.201  35.555  51.953  1.00 41.30           C
ATOM   4017  CD1 ILE A 946     -11.671  34.539  54.287  1.00 38.80           C
ATOM   4018  H   ILE A 946     -15.605  34.325  54.937  1.00  0.00           H
ATOM   4019  HA  ILE A 946     -15.102  36.714  53.340  1.00  0.00           H
ATOM   4020  HB  ILE A 946     -14.024  33.902  52.943  1.00  0.00           H
ATOM   4021 HG12 ILE A 946     -12.970  36.196  54.665  1.00  0.00           H
ATOM   4022 HG13 ILE A 946     -13.567  34.645  55.171  1.00  0.00           H
ATOM   4023 HG21 ILE A 946     -12.225  35.104  51.788  1.00  0.00           H
ATOM   4024 HG22 ILE A 946     -13.731  35.398  51.015  1.00  0.00           H
ATOM   4025 HG23 ILE A 946     -13.047  36.629  52.069  1.00  0.00           H
ATOM   4026 HD11 ILE A 946     -11.194  34.530  55.267  1.00  0.00           H
ATOM   4027 HD12 ILE A 946     -11.711  33.507  53.935  1.00  0.00           H
ATOM   4028 HD13 ILE A 946     -11.012  35.104  53.629  1.00  0.00           H
ATOM   4029  N   MET A 947     -16.810  34.153  52.146  1.00 43.79           N
ATOM   4030  CA  MET A 947     -17.728  33.810  51.060  1.00 43.78           C
ATOM   4031  C   MET A 947     -18.809  34.836  51.008  1.00 44.20           C
ATOM   4032  O   MET A 947     -19.265  35.208  49.940  1.00 45.91           O
ATOM   4033  CB  MET A 947     -18.342  32.436  51.241  1.00 42.67           C
ATOM   4034  CG  MET A 947     -17.500  31.324  50.693  1.00 43.52           C
ATOM   4035  SD  MET A 947     -17.517  29.838  51.754  1.00 47.59           S
ATOM   4036  CE  MET A 947     -19.120  29.195  51.414  1.00 43.32           C
ATOM   4037  H   MET A 947     -16.704  33.523  52.930  1.00  0.00           H
ATOM   4038  HA  MET A 947     -17.196  33.844  50.106  1.00  0.00           H
ATOM   4039  HB2 MET A 947     -18.521  32.274  52.300  1.00  0.00           H
ATOM   4040  HB3 MET A 947     -19.324  32.368  50.777  1.00  0.00           H
ATOM   4041  HG2 MET A 947     -17.777  31.079  49.667  1.00  0.00           H
ATOM   4042  HG3 MET A 947     -16.456  31.638  50.655  1.00  0.00           H
ATOM   4043  HE1 MET A 947     -19.041  28.121  51.344  1.00  0.00           H
ATOM   4044  HE2 MET A 947     -19.853  29.516  52.150  1.00  0.00           H
ATOM   4045  HE3 MET A 947     -19.346  29.619  50.437  1.00  0.00           H
ATOM   4046  N   VAL A 948     -19.199  35.315  52.175  1.00 44.32           N
ATOM   4047  CA  VAL A 948     -20.274  36.277  52.277  1.00 43.03           C
ATOM   4048  C   VAL A 948     -19.864  37.609  51.702  1.00 42.72           C
ATOM   4049  O   VAL A 948     -20.600  38.185  50.928  1.00 42.36           O
ATOM   4050  CB  VAL A 948     -20.698  36.471  53.713  1.00 43.48           C
ATOM   4051  CG1 VAL A 948     -21.869  37.453  53.772  1.00 44.16           C
ATOM   4052  CG2 VAL A 948     -21.059  35.129  54.335  1.00 41.97           C
ATOM   4053  H   VAL A 948     -18.789  34.952  53.026  1.00  0.00           H
ATOM   4054  HA  VAL A 948     -21.128  35.900  51.709  1.00  0.00           H
ATOM   4055  HB  VAL A 948     -19.872  36.888  54.290  1.00  0.00           H
ATOM   4056 HG11 VAL A 948     -22.283  37.487  54.780  1.00  0.00           H
ATOM   4057 HG12 VAL A 948     -21.584  38.478  53.534  1.00  0.00           H
ATOM   4058 HG13 VAL A 948     -22.678  37.160  53.101  1.00  0.00           H
ATOM   4059 HG21 VAL A 948     -20.590  35.002  55.310  1.00  0.00           H
ATOM   4060 HG22 VAL A 948     -22.133  35.061  54.510  1.00  0.00           H
ATOM   4061 HG23 VAL A 948     -20.831  34.260  53.722  1.00  0.00           H
ATOM   4062  N   LYS A 949     -18.682  38.060  51.999  1.00 42.89           N
ATOM   4063  CA  LYS A 949     -18.275  39.327  51.479  1.00 44.12           C
ATOM   4064  C   LYS A 949     -18.237  39.285  49.994  1.00 44.84           C
ATOM   4065  O   LYS A 949     -18.427  40.259  49.352  1.00 45.60           O
ATOM   4066  CB  LYS A 949     -16.955  39.756  52.049  1.00 43.62           C
ATOM   4067  CG  LYS A 949     -17.031  40.103  53.483  1.00 46.09           C
ATOM   4068  CD  LYS A 949     -15.671  40.059  54.116  1.00 50.85           C
ATOM   4069  CE  LYS A 949     -15.740  40.226  55.604  1.00 52.73           C
ATOM   4070  NZ  LYS A 949     -14.575  40.940  56.124  1.00 53.33           N1+
ATOM   4071  H   LYS A 949     -18.071  37.551  52.623  1.00  0.00           H
ATOM   4072  HA  LYS A 949     -19.015  40.081  51.761  1.00  0.00           H
ATOM   4073  HB2 LYS A 949     -16.234  38.952  51.886  1.00  0.00           H
ATOM   4074  HB3 LYS A 949     -16.566  40.623  51.513  1.00  0.00           H
ATOM   4075  HG2 LYS A 949     -17.483  41.089  53.604  1.00  0.00           H
ATOM   4076  HG3 LYS A 949     -17.683  39.408  54.012  1.00  0.00           H
ATOM   4077  HD2 LYS A 949     -15.158  39.123  53.890  1.00  0.00           H
ATOM   4078  HD3 LYS A 949     -15.067  40.851  53.669  1.00  0.00           H
ATOM   4079  HE2 LYS A 949     -16.626  40.791  55.898  1.00  0.00           H
ATOM   4080  HE3 LYS A 949     -15.801  39.253  56.086  1.00  0.00           H
ATOM   4081  HZ1 LYS A 949     -14.653  41.032  57.127  1.00  0.00           H
ATOM   4082  HZ2 LYS A 949     -13.735  40.424  55.901  1.00  0.00           H
ATOM   4083  HZ3 LYS A 949     -14.525  41.858  55.705  1.00  0.00           H
ATOM   4084  N   CYS A 950     -17.972  38.138  49.440  1.00 45.40           N
ATOM   4085  CA  CYS A 950     -17.889  38.013  48.013  1.00 45.07           C
ATOM   4086  C   CYS A 950     -19.206  38.285  47.386  1.00 45.29           C
ATOM   4087  O   CYS A 950     -19.275  38.732  46.291  1.00 45.58           O
ATOM   4088  CB  CYS A 950     -17.422  36.639  47.650  1.00 44.29           C
ATOM   4089  SG  CYS A 950     -15.643  36.402  47.890  1.00 41.34           S
ATOM   4090  H   CYS A 950     -17.803  37.324  50.016  1.00  0.00           H
ATOM   4091  HA  CYS A 950     -17.186  38.739  47.607  1.00  0.00           H
ATOM   4092  HB2 CYS A 950     -17.961  35.842  48.140  1.00  0.00           H
ATOM   4093  HB3 CYS A 950     -17.581  36.467  46.584  1.00  0.00           H
ATOM   4094  HG  CYS A 950     -15.666  36.535  49.221  1.00  0.00           H
ATOM   4095  N   TRP A 951     -20.257  37.939  48.088  1.00 45.98           N
ATOM   4096  CA  TRP A 951     -21.619  38.038  47.591  1.00 46.84           C
ATOM   4097  C   TRP A 951     -22.251  39.339  48.011  1.00 46.71           C
ATOM   4098  O   TRP A 951     -23.463  39.513  47.963  1.00 45.66           O
ATOM   4099  CB  TRP A 951     -22.423  36.867  48.081  1.00 46.39           C
ATOM   4100  CG  TRP A 951     -21.786  35.636  47.689  1.00 46.67           C
ATOM   4101  CD1 TRP A 951     -21.074  35.427  46.555  1.00 48.12           C
ATOM   4102  CD2 TRP A 951     -21.792  34.397  48.398  1.00 47.45           C
ATOM   4103  NE1 TRP A 951     -20.631  34.125  46.504  1.00 48.70           N
ATOM   4104  CE3 TRP A 951     -22.329  33.980  49.622  1.00 46.69           C
ATOM   4105  CE2 TRP A 951     -21.057  33.469  47.624  1.00 46.55           C
ATOM   4106  CZ3 TRP A 951     -22.134  32.665  50.012  1.00 44.11           C
ATOM   4107  CZ2 TRP A 951     -20.857  32.165  48.018  1.00 45.01           C
ATOM   4108  CH2 TRP A 951     -21.402  31.778  49.214  1.00 43.18           C
ATOM   4109  H   TRP A 951     -20.122  37.571  49.021  1.00  0.00           H
ATOM   4110  HA  TRP A 951     -21.646  38.053  46.502  1.00  0.00           H
ATOM   4111  HB2 TRP A 951     -22.538  36.894  49.166  1.00  0.00           H
ATOM   4112  HB3 TRP A 951     -23.411  36.865  47.627  1.00  0.00           H
ATOM   4113  HD1 TRP A 951     -20.875  36.162  45.793  1.00  0.00           H
ATOM   4114  HE1 TRP A 951     -20.083  33.750  45.742  1.00  0.00           H
ATOM   4115  HE3 TRP A 951     -22.819  34.676  50.282  1.00  0.00           H
ATOM   4116  HZ3 TRP A 951     -22.531  32.329  50.958  1.00  0.00           H
ATOM   4117  HZ2 TRP A 951     -20.297  31.470  47.416  1.00  0.00           H
ATOM   4118  HH2 TRP A 951     -21.261  30.762  49.550  1.00  0.00           H
ATOM   4119  N   MET A 952     -21.406  40.285  48.327  1.00 47.36           N
ATOM   4120  CA  MET A 952     -21.836  41.592  48.676  1.00 48.77           C
ATOM   4121  C   MET A 952     -22.498  42.078  47.449  1.00 50.95           C
ATOM   4122  O   MET A 952     -22.040  41.790  46.406  1.00 51.86           O
ATOM   4123  CB  MET A 952     -20.610  42.431  48.873  1.00 48.17           C
ATOM   4124  CG  MET A 952     -20.658  43.316  50.038  1.00 49.46           C
ATOM   4125  SD  MET A 952     -21.427  42.514  51.362  1.00 49.24           S
ATOM   4126  CE  MET A 952     -21.848  43.888  52.333  1.00 49.43           C
ATOM   4127  H   MET A 952     -20.415  40.087  48.326  1.00  0.00           H
ATOM   4128  HA  MET A 952     -22.604  41.524  49.444  1.00  0.00           H
ATOM   4129  HB2 MET A 952     -19.704  41.900  48.909  1.00  0.00           H
ATOM   4130  HB3 MET A 952     -20.408  43.088  48.025  1.00  0.00           H
ATOM   4131  HG2 MET A 952     -19.659  43.624  50.340  1.00  0.00           H
ATOM   4132  HG3 MET A 952     -21.240  44.204  49.791  1.00  0.00           H
ATOM   4133  HE1 MET A 952     -22.328  43.561  53.255  1.00  0.00           H
ATOM   4134  HE2 MET A 952     -20.957  44.460  52.592  1.00  0.00           H
ATOM   4135  HE3 MET A 952     -22.540  44.540  51.800  1.00  0.00           H
ATOM   4136  N   ILE A 953     -23.582  42.818  47.560  1.00 52.01           N
ATOM   4137  CA  ILE A 953     -24.220  43.443  46.398  1.00 51.45           C
ATOM   4138  C   ILE A 953     -23.404  44.582  45.827  1.00 51.33           C
ATOM   4139  O   ILE A 953     -23.274  44.707  44.634  1.00 50.94           O
ATOM   4140  CB  ILE A 953     -25.603  43.947  46.702  1.00 51.49           C
ATOM   4141  CG1 ILE A 953     -26.570  42.766  46.693  1.00 51.57           C
ATOM   4142  CG2 ILE A 953     -26.007  44.961  45.672  1.00 51.35           C
ATOM   4143  CD1 ILE A 953     -28.024  43.151  46.878  1.00 51.07           C
ATOM   4144  H   ILE A 953     -23.948  43.029  48.477  1.00  0.00           H
ATOM   4145  HA  ILE A 953     -24.290  42.698  45.601  1.00  0.00           H
ATOM   4146  HB  ILE A 953     -25.626  44.427  47.682  1.00  0.00           H
ATOM   4147 HG12 ILE A 953     -26.480  42.189  45.771  1.00  0.00           H
ATOM   4148 HG13 ILE A 953     -26.292  42.096  47.503  1.00  0.00           H
ATOM   4149 HG21 ILE A 953     -27.048  45.251  45.791  1.00  0.00           H
ATOM   4150 HG22 ILE A 953     -25.510  45.929  45.756  1.00  0.00           H
ATOM   4151 HG23 ILE A 953     -25.919  44.587  44.650  1.00  0.00           H
ATOM   4152 HD11 ILE A 953     -28.623  42.267  47.100  1.00  0.00           H
ATOM   4153 HD12 ILE A 953     -28.154  43.848  47.706  1.00  0.00           H
ATOM   4154 HD13 ILE A 953     -28.454  43.594  45.979  1.00  0.00           H
ATOM   4155  N   ASP A 954     -22.853  45.415  46.682  1.00 52.90           N
ATOM   4156  CA  ASP A 954     -21.992  46.450  46.185  1.00 56.15           C
ATOM   4157  C   ASP A 954     -20.671  45.838  45.693  1.00 57.19           C
ATOM   4158  O   ASP A 954     -19.971  45.157  46.449  1.00 58.61           O
ATOM   4159  CB  ASP A 954     -21.752  47.507  47.267  1.00 58.11           C
ATOM   4160  CG  ASP A 954     -20.599  48.444  46.914  1.00 61.66           C
ATOM   4161  OD1 ASP A 954     -20.712  49.192  45.922  1.00 63.17           O
ATOM   4162  OD2 ASP A 954     -19.558  48.408  47.609  1.00 64.30           O1-
ATOM   4163  H   ASP A 954     -22.971  45.298  47.677  1.00  0.00           H
ATOM   4164  HA  ASP A 954     -22.474  46.967  45.350  1.00  0.00           H
ATOM   4165  HB2 ASP A 954     -22.654  48.100  47.423  1.00  0.00           H
ATOM   4166  HB3 ASP A 954     -21.530  47.027  48.221  1.00  0.00           H
ATOM   4167  N   ALA A 955     -20.335  46.091  44.432  1.00 57.66           N
ATOM   4168  CA  ALA A 955     -19.162  45.480  43.822  1.00 58.61           C
ATOM   4169  C   ALA A 955     -17.895  45.824  44.563  1.00 58.68           C
ATOM   4170  O   ALA A 955     -16.998  44.986  44.710  1.00 58.74           O
ATOM   4171  CB  ALA A 955     -19.044  45.901  42.386  1.00 58.99           C
ATOM   4172  H   ALA A 955     -20.931  46.672  43.860  1.00  0.00           H
ATOM   4173  HA  ALA A 955     -19.291  44.399  43.845  1.00  0.00           H
ATOM   4174  HB1 ALA A 955     -18.182  45.437  41.904  1.00  0.00           H
ATOM   4175  HB2 ALA A 955     -19.927  45.603  41.819  1.00  0.00           H
ATOM   4176  HB3 ALA A 955     -18.936  46.982  42.286  1.00  0.00           H
ATOM   4177  N   ASP A 956     -17.819  47.064  45.038  1.00 58.68           N
ATOM   4178  CA  ASP A 956     -16.605  47.487  45.725  1.00 58.88           C
ATOM   4179  C   ASP A 956     -16.554  47.155  47.190  1.00 57.55           C
ATOM   4180  O   ASP A 956     -15.597  47.498  47.863  1.00 58.32           O
ATOM   4181  CB  ASP A 956     -16.372  48.962  45.525  1.00 61.38           C
ATOM   4182  CG  ASP A 956     -16.042  49.262  44.122  1.00 64.86           C
ATOM   4183  OD1 ASP A 956     -15.934  50.464  43.807  1.00 67.58           O
ATOM   4184  OD2 ASP A 956     -15.894  48.284  43.338  1.00 66.05           O1-
ATOM   4185  H   ASP A 956     -18.576  47.722  44.913  1.00  0.00           H
ATOM   4186  HA  ASP A 956     -15.730  46.956  45.339  1.00  0.00           H
ATOM   4187  HB2 ASP A 956     -17.254  49.534  45.819  1.00  0.00           H
ATOM   4188  HB3 ASP A 956     -15.541  49.332  46.128  1.00  0.00           H
ATOM   4189  N   SER A 957     -17.573  46.488  47.690  1.00 56.24           N
ATOM   4190  CA  SER A 957     -17.503  46.030  49.049  1.00 56.29           C
ATOM   4191  C   SER A 957     -17.021  44.601  49.086  1.00 56.15           C
ATOM   4192  O   SER A 957     -16.869  44.019  50.143  1.00 57.26           O
ATOM   4193  CB  SER A 957     -18.856  46.156  49.736  1.00 56.19           C
ATOM   4194  OG  SER A 957     -19.245  47.512  49.822  1.00 57.90           O
ATOM   4195  H   SER A 957     -18.379  46.264  47.122  1.00  0.00           H
ATOM   4196  HA  SER A 957     -16.809  46.604  49.667  1.00  0.00           H
ATOM   4197  HB2 SER A 957     -19.618  45.636  49.160  1.00  0.00           H
ATOM   4198  HB3 SER A 957     -18.840  45.744  50.746  1.00  0.00           H
ATOM   4199  HG  SER A 957     -19.317  47.870  48.935  1.00  0.00           H
ATOM   4200  N   ARG A 958     -16.794  44.019  47.931  1.00 56.30           N
ATOM   4201  CA  ARG A 958     -16.325  42.657  47.852  1.00 56.19           C
ATOM   4202  C   ARG A 958     -14.845  42.601  48.008  1.00 57.44           C
ATOM   4203  O   ARG A 958     -14.169  43.541  47.701  1.00 57.29           O
ATOM   4204  CB  ARG A 958     -16.712  42.035  46.525  1.00 55.12           C
ATOM   4205  CG  ARG A 958     -18.055  42.432  46.044  1.00 54.38           C
ATOM   4206  CD  ARG A 958     -18.378  41.725  44.792  1.00 52.73           C
ATOM   4207  NE  ARG A 958     -19.777  41.831  44.455  1.00 51.53           N
ATOM   4208  CZ  ARG A 958     -20.239  41.806  43.228  1.00 51.13           C
ATOM   4209  NH1 ARG A 958     -19.428  41.676  42.224  1.00 50.63           N
ATOM   4210  NH2 ARG A 958     -21.515  41.914  43.012  1.00 51.32           N1+
ATOM   4211  H   ARG A 958     -16.915  44.543  47.076  1.00  0.00           H
ATOM   4212  HA  ARG A 958     -16.843  42.105  48.631  1.00  0.00           H
ATOM   4213  HB2 ARG A 958     -15.991  42.312  45.754  1.00  0.00           H
ATOM   4214  HB3 ARG A 958     -16.661  40.949  46.600  1.00  0.00           H
ATOM   4215  HG2 ARG A 958     -18.769  42.103  46.796  1.00  0.00           H
ATOM   4216  HG3 ARG A 958     -18.223  43.489  45.956  1.00  0.00           H
ATOM   4217  HD2 ARG A 958     -17.752  42.148  44.007  1.00  0.00           H
ATOM   4218  HD3 ARG A 958     -18.132  40.664  44.852  1.00  0.00           H
ATOM   4219  HE  ARG A 958     -20.432  41.878  45.227  1.00  0.00           H
ATOM   4220 HH11 ARG A 958     -18.440  41.506  42.367  1.00  0.00           H
ATOM   4221 HH12 ARG A 958     -19.777  41.762  41.276  1.00  0.00           H
ATOM   4222 HH21 ARG A 958     -22.149  42.056  43.786  1.00  0.00           H
ATOM   4223 HH22 ARG A 958     -21.867  41.933  42.066  1.00  0.00           H
ATOM   4224  N   PRO A 959     -14.338  41.482  48.483  1.00 58.52           N
ATOM   4225  CA  PRO A 959     -12.912  41.324  48.631  1.00 58.60           C
ATOM   4226  C   PRO A 959     -12.281  41.425  47.278  1.00 59.89           C
ATOM   4227  O   PRO A 959     -12.953  41.363  46.258  1.00 60.95           O
ATOM   4228  CB  PRO A 959     -12.764  39.896  49.122  1.00 57.03           C
ATOM   4229  CG  PRO A 959     -14.108  39.477  49.566  1.00 57.96           C
ATOM   4230  CD  PRO A 959     -15.050  40.215  48.727  1.00 57.82           C
ATOM   4231  HA  PRO A 959     -12.505  42.049  49.339  1.00  0.00           H
ATOM   4232  HB2 PRO A 959     -12.455  39.221  48.326  1.00  0.00           H
ATOM   4233  HB3 PRO A 959     -12.023  39.810  49.918  1.00  0.00           H
ATOM   4234  HG2 PRO A 959     -14.257  38.399  49.525  1.00  0.00           H
ATOM   4235  HG3 PRO A 959     -14.241  39.777  50.607  1.00  0.00           H
ATOM   4236  HD2 PRO A 959     -15.218  39.695  47.787  1.00  0.00           H
ATOM   4237  HD3 PRO A 959     -15.971  40.342  49.266  1.00  0.00           H
ATOM   4238  N   LYS A 960     -10.971  41.488  47.273  1.00 61.32           N
ATOM   4239  CA  LYS A 960     -10.180  41.564  46.078  1.00 62.44           C
ATOM   4240  C   LYS A 960      -9.235  40.381  46.075  1.00 61.76           C
ATOM   4241  O   LYS A 960      -8.863  39.861  47.101  1.00 60.77           O
ATOM   4242  CB  LYS A 960      -9.388  42.857  46.059  1.00 64.12           C
ATOM   4243  CG  LYS A 960     -10.080  44.000  45.402  1.00 66.75           C
ATOM   4244  CD  LYS A 960      -9.078  44.981  44.877  1.00 68.03           C
ATOM   4245  CE  LYS A 960      -9.511  45.625  43.578  1.00 69.18           C
ATOM   4246  NZ  LYS A 960      -8.668  46.795  43.224  1.00 70.11           N1+
ATOM   4247  H   LYS A 960     -10.483  41.506  48.159  1.00  0.00           H
ATOM   4248  HA  LYS A 960     -10.783  41.482  45.170  1.00  0.00           H
ATOM   4249  HB2 LYS A 960      -9.080  43.150  47.060  1.00  0.00           H
ATOM   4250  HB3 LYS A 960      -8.455  42.656  45.530  1.00  0.00           H
ATOM   4251  HG2 LYS A 960     -10.654  43.613  44.562  1.00  0.00           H
ATOM   4252  HG3 LYS A 960     -10.800  44.472  46.072  1.00  0.00           H
ATOM   4253  HD2 LYS A 960      -8.908  45.740  45.642  1.00  0.00           H
ATOM   4254  HD3 LYS A 960      -8.111  44.517  44.697  1.00  0.00           H
ATOM   4255  HE2 LYS A 960      -9.473  44.897  42.766  1.00  0.00           H
ATOM   4256  HE3 LYS A 960     -10.545  45.966  43.649  1.00  0.00           H
ATOM   4257  HZ1 LYS A 960      -8.925  47.133  42.307  1.00  0.00           H
ATOM   4258  HZ2 LYS A 960      -8.799  47.524  43.911  1.00  0.00           H
ATOM   4259  HZ3 LYS A 960      -7.716  46.473  43.231  1.00  0.00           H
ATOM   4260  N   PHE A 961      -8.848  39.937  44.904  1.00 61.14           N
ATOM   4261  CA  PHE A 961      -8.119  38.699  44.832  1.00 59.60           C
ATOM   4262  C   PHE A 961      -6.865  38.764  45.631  1.00 61.02           C
ATOM   4263  O   PHE A 961      -6.579  37.828  46.372  1.00 61.95           O
ATOM   4264  CB  PHE A 961      -7.870  38.286  43.399  1.00 57.27           C
ATOM   4265  CG  PHE A 961      -9.073  37.717  42.765  1.00 54.71           C
ATOM   4266  CD1 PHE A 961      -9.646  36.561  43.273  1.00 51.36           C
ATOM   4267  CD2 PHE A 961      -9.677  38.354  41.690  1.00 53.33           C
ATOM   4268  CE1 PHE A 961     -10.778  36.038  42.711  1.00 49.41           C
ATOM   4269  CE2 PHE A 961     -10.812  37.820  41.101  1.00 50.81           C
ATOM   4270  CZ  PHE A 961     -11.367  36.664  41.626  1.00 50.12           C
ATOM   4271  H   PHE A 961      -9.164  40.377  44.051  1.00  0.00           H
ATOM   4272  HA  PHE A 961      -8.717  37.926  45.304  1.00  0.00           H
ATOM   4273  HB2 PHE A 961      -7.483  39.122  42.814  1.00  0.00           H
ATOM   4274  HB3 PHE A 961      -7.105  37.509  43.359  1.00  0.00           H
ATOM   4275  HD1 PHE A 961      -9.195  36.049  44.111  1.00  0.00           H
ATOM   4276  HD2 PHE A 961      -9.255  39.265  41.289  1.00  0.00           H
ATOM   4277  HE1 PHE A 961     -11.186  35.140  43.115  1.00  0.00           H
ATOM   4278  HE2 PHE A 961     -11.271  38.310  40.254  1.00  0.00           H
ATOM   4279  HZ  PHE A 961     -12.256  36.243  41.179  1.00  0.00           H
ATOM   4280  N   ARG A 962      -6.133  39.876  45.525  1.00 62.30           N
ATOM   4281  CA  ARG A 962      -4.869  39.961  46.269  1.00 62.99           C
ATOM   4282  C   ARG A 962      -5.165  39.800  47.752  1.00 62.04           C
ATOM   4283  O   ARG A 962      -4.392  39.182  48.459  1.00 62.13           O
ATOM   4284  CB  ARG A 962      -4.043  41.232  45.956  1.00 65.51           C
ATOM   4285  CG  ARG A 962      -4.816  42.558  46.052  1.00 70.07           C
ATOM   4286  CD  ARG A 962      -4.101  43.695  45.304  1.00 72.90           C
ATOM   4287  NE  ARG A 962      -4.887  44.941  45.248  1.00 75.65           N
ATOM   4288  CZ  ARG A 962      -5.704  45.301  44.241  1.00 77.01           C
ATOM   4289  NH1 ARG A 962      -5.885  44.527  43.161  1.00 76.51           N
ATOM   4290  NH2 ARG A 962      -6.353  46.457  44.316  1.00 77.83           N1+
ATOM   4291  H   ARG A 962      -6.415  40.628  44.913  1.00  0.00           H
ATOM   4292  HA  ARG A 962      -4.225  39.131  45.999  1.00  0.00           H
ATOM   4293  HB2 ARG A 962      -3.157  41.275  46.591  1.00  0.00           H
ATOM   4294  HB3 ARG A 962      -3.665  41.122  44.938  1.00  0.00           H
ATOM   4295  HG2 ARG A 962      -5.812  42.451  45.623  1.00  0.00           H
ATOM   4296  HG3 ARG A 962      -4.965  42.827  47.098  1.00  0.00           H
ATOM   4297  HD2 ARG A 962      -3.158  43.916  45.805  1.00  0.00           H
ATOM   4298  HD3 ARG A 962      -3.835  43.386  44.293  1.00  0.00           H
ATOM   4299  HE  ARG A 962      -4.801  45.550  46.050  1.00  0.00           H
ATOM   4300 HH11 ARG A 962      -5.422  43.631  43.104  1.00  0.00           H
ATOM   4301 HH12 ARG A 962      -6.490  44.797  42.398  1.00  0.00           H
ATOM   4302 HH21 ARG A 962      -6.313  46.974  45.184  1.00  0.00           H
ATOM   4303 HH22 ARG A 962      -6.481  46.982  43.464  1.00  0.00           H
ATOM   4304  N   GLU A 963      -6.312  40.305  48.211  1.00 61.02           N
ATOM   4305  CA  GLU A 963      -6.660  40.175  49.614  1.00 59.48           C
ATOM   4306  C   GLU A 963      -6.972  38.722  49.890  1.00 58.02           C
ATOM   4307  O   GLU A 963      -6.402  38.102  50.796  1.00 58.18           O
ATOM   4308  CB  GLU A 963      -7.848  41.032  49.973  1.00 59.73           C
ATOM   4309  CG  GLU A 963      -7.720  42.480  49.616  1.00 62.65           C
ATOM   4310  CD  GLU A 963      -9.007  43.246  49.882  1.00 65.38           C
ATOM   4311  OE1 GLU A 963      -9.090  44.433  49.535  1.00 68.03           O
ATOM   4312  OE2 GLU A 963      -9.952  42.674  50.446  1.00 66.20           O1-
ATOM   4313  H   GLU A 963      -6.964  40.755  47.584  1.00  0.00           H
ATOM   4314  HA  GLU A 963      -5.821  40.514  50.219  1.00  0.00           H
ATOM   4315  HB2 GLU A 963      -8.750  40.633  49.507  1.00  0.00           H
ATOM   4316  HB3 GLU A 963      -8.018  40.948  51.049  1.00  0.00           H
ATOM   4317  HG2 GLU A 963      -6.914  42.938  50.190  1.00  0.00           H
ATOM   4318  HG3 GLU A 963      -7.466  42.607  48.565  1.00  0.00           H
ATOM   4319  N   LEU A 964      -7.859  38.171  49.073  1.00 56.49           N
ATOM   4320  CA  LEU A 964      -8.287  36.786  49.199  1.00 55.08           C
ATOM   4321  C   LEU A 964      -7.118  35.840  49.238  1.00 55.04           C
ATOM   4322  O   LEU A 964      -7.150  34.811  49.907  1.00 54.73           O
ATOM   4323  CB  LEU A 964      -9.167  36.432  48.019  1.00 54.67           C
ATOM   4324  CG  LEU A 964     -10.479  37.202  48.093  1.00 53.72           C
ATOM   4325  CD1 LEU A 964     -11.205  37.136  46.784  1.00 52.53           C
ATOM   4326  CD2 LEU A 964     -11.332  36.624  49.212  1.00 52.24           C
ATOM   4327  H   LEU A 964      -8.264  38.734  48.334  1.00  0.00           H
ATOM   4328  HA  LEU A 964      -8.811  36.669  50.147  1.00  0.00           H
ATOM   4329  HB2 LEU A 964      -8.655  36.640  47.084  1.00  0.00           H
ATOM   4330  HB3 LEU A 964      -9.374  35.360  47.997  1.00  0.00           H
ATOM   4331  HG  LEU A 964     -10.316  38.253  48.318  1.00  0.00           H
ATOM   4332 HD11 LEU A 964     -12.218  37.519  46.881  1.00  0.00           H
ATOM   4333 HD12 LEU A 964     -10.724  37.730  46.013  1.00  0.00           H
ATOM   4334 HD13 LEU A 964     -11.283  36.111  46.419  1.00  0.00           H
ATOM   4335 HD21 LEU A 964     -12.349  37.010  49.176  1.00  0.00           H
ATOM   4336 HD22 LEU A 964     -11.410  35.538  49.142  1.00  0.00           H
ATOM   4337 HD23 LEU A 964     -10.951  36.872  50.201  1.00  0.00           H
ATOM   4338  N   ILE A 965      -6.071  36.203  48.516  1.00 55.23           N
ATOM   4339  CA  ILE A 965      -4.876  35.396  48.513  1.00 55.89           C
ATOM   4340  C   ILE A 965      -4.264  35.440  49.894  1.00 56.51           C
ATOM   4341  O   ILE A 965      -4.021  34.396  50.486  1.00 56.75           O
ATOM   4342  CB  ILE A 965      -3.864  35.847  47.447  1.00 55.67           C
ATOM   4343  CG1 ILE A 965      -4.440  35.617  46.046  1.00 54.53           C
ATOM   4344  CG2 ILE A 965      -2.550  35.090  47.614  1.00 55.11           C
ATOM   4345  CD1 ILE A 965      -3.833  36.522  45.013  1.00 52.66           C
ATOM   4346  H   ILE A 965      -6.109  37.040  47.947  1.00  0.00           H
ATOM   4347  HA  ILE A 965      -5.150  34.360  48.296  1.00  0.00           H
ATOM   4348  HB  ILE A 965      -3.667  36.911  47.572  1.00  0.00           H
ATOM   4349 HG12 ILE A 965      -4.256  34.581  45.765  1.00  0.00           H
ATOM   4350 HG13 ILE A 965      -5.516  35.722  46.013  1.00  0.00           H
ATOM   4351 HG21 ILE A 965      -1.881  35.277  46.774  1.00  0.00           H
ATOM   4352 HG22 ILE A 965      -1.997  35.389  48.505  1.00  0.00           H
ATOM   4353 HG23 ILE A 965      -2.711  34.013  47.659  1.00  0.00           H
ATOM   4354 HD11 ILE A 965      -3.836  36.049  44.047  1.00  0.00           H
ATOM   4355 HD12 ILE A 965      -4.416  37.424  44.884  1.00  0.00           H
ATOM   4356 HD13 ILE A 965      -2.802  36.796  45.235  1.00  0.00           H
ATOM   4357  N   ILE A 966      -4.053  36.638  50.426  1.00 57.77           N
ATOM   4358  CA  ILE A 966      -3.325  36.753  51.683  1.00 59.31           C
ATOM   4359  C   ILE A 966      -4.104  36.126  52.819  1.00 60.30           C
ATOM   4360  O   ILE A 966      -3.521  35.501  53.708  1.00 61.27           O
ATOM   4361  CB  ILE A 966      -2.910  38.222  52.064  1.00 59.39           C
ATOM   4362  CG1 ILE A 966      -4.137  39.116  52.251  1.00 60.88           C
ATOM   4363  CG2 ILE A 966      -1.891  38.829  51.060  1.00 59.18           C
ATOM   4364  CD1 ILE A 966      -3.791  40.616  52.413  1.00 63.00           C
ATOM   4365  H   ILE A 966      -4.315  37.477  49.926  1.00  0.00           H
ATOM   4366  HA  ILE A 966      -2.388  36.211  51.566  1.00  0.00           H
ATOM   4367  HB  ILE A 966      -2.396  38.176  53.026  1.00  0.00           H
ATOM   4368 HG12 ILE A 966      -4.561  39.150  51.273  1.00  0.00           H
ATOM   4369 HG13 ILE A 966      -4.852  38.794  53.006  1.00  0.00           H
ATOM   4370 HG21 ILE A 966      -1.436  39.744  51.439  1.00  0.00           H
ATOM   4371 HG22 ILE A 966      -1.074  38.132  50.874  1.00  0.00           H
ATOM   4372 HG23 ILE A 966      -2.352  39.050  50.099  1.00  0.00           H
ATOM   4373 HD11 ILE A 966      -4.699  41.193  52.589  1.00  0.00           H
ATOM   4374 HD12 ILE A 966      -3.130  40.778  53.265  1.00  0.00           H
ATOM   4375 HD13 ILE A 966      -3.320  41.039  51.525  1.00  0.00           H
ATOM   4376  N   GLU A 967      -5.415  36.313  52.810  1.00 60.55           N
ATOM   4377  CA  GLU A 967      -6.262  35.745  53.830  1.00 60.72           C
ATOM   4378  C   GLU A 967      -6.377  34.246  53.865  1.00 59.58           C
ATOM   4379  O   GLU A 967      -6.146  33.665  54.867  1.00 59.85           O
ATOM   4380  CB  GLU A 967      -7.650  36.308  53.667  1.00 63.51           C
ATOM   4381  CG  GLU A 967      -7.848  37.628  54.327  1.00 68.84           C
ATOM   4382  CD  GLU A 967      -8.283  37.483  55.737  1.00 71.74           C
ATOM   4383  OE1 GLU A 967      -9.483  37.339  55.953  1.00 73.99           O
ATOM   4384  OE2 GLU A 967      -7.433  37.492  56.637  1.00 73.26           O1-
ATOM   4385  H   GLU A 967      -5.838  36.860  52.069  1.00  0.00           H
ATOM   4386  HA  GLU A 967      -5.874  36.054  54.804  1.00  0.00           H
ATOM   4387  HB2 GLU A 967      -7.881  36.407  52.604  1.00  0.00           H
ATOM   4388  HB3 GLU A 967      -8.416  35.618  54.034  1.00  0.00           H
ATOM   4389  HG2 GLU A 967      -6.951  38.245  54.268  1.00  0.00           H
ATOM   4390  HG3 GLU A 967      -8.624  38.181  53.796  1.00  0.00           H
ATOM   4391  N   PHE A 968      -6.650  33.595  52.759  1.00 58.57           N
ATOM   4392  CA  PHE A 968      -6.596  32.153  52.748  1.00 57.78           C
ATOM   4393  C   PHE A 968      -5.184  31.690  52.915  1.00 58.43           C
ATOM   4394  O   PHE A 968      -4.930  30.582  53.348  1.00 58.99           O
ATOM   4395  CB  PHE A 968      -7.152  31.624  51.457  1.00 57.02           C
ATOM   4396  CG  PHE A 968      -8.625  31.545  51.456  1.00 55.31           C
ATOM   4397  CD1 PHE A 968      -9.378  32.586  50.941  1.00 54.46           C
ATOM   4398  CD2 PHE A 968      -9.271  30.442  52.003  1.00 54.94           C
ATOM   4399  CE1 PHE A 968     -10.743  32.530  50.959  1.00 53.70           C
ATOM   4400  CE2 PHE A 968     -10.628  30.373  52.027  1.00 55.47           C
ATOM   4401  CZ  PHE A 968     -11.373  31.418  51.505  1.00 54.88           C
ATOM   4402  H   PHE A 968      -6.830  34.092  51.896  1.00  0.00           H
ATOM   4403  HA  PHE A 968      -7.177  31.741  53.578  1.00  0.00           H
ATOM   4404  HB2 PHE A 968      -6.795  32.194  50.597  1.00  0.00           H
ATOM   4405  HB3 PHE A 968      -6.818  30.601  51.297  1.00  0.00           H
ATOM   4406  HD1 PHE A 968      -8.914  33.453  50.516  1.00  0.00           H
ATOM   4407  HD2 PHE A 968      -8.661  29.619  52.273  1.00  0.00           H
ATOM   4408  HE1 PHE A 968     -11.327  33.338  50.544  1.00  0.00           H
ATOM   4409  HE2 PHE A 968     -11.119  29.492  52.413  1.00  0.00           H
ATOM   4410  HZ  PHE A 968     -12.452  31.363  51.513  1.00  0.00           H
ATOM   4411  N   SER A 969      -4.246  32.545  52.562  1.00 59.30           N
ATOM   4412  CA  SER A 969      -2.870  32.185  52.746  1.00 60.90           C
ATOM   4413  C   SER A 969      -2.565  32.150  54.221  1.00 61.51           C
ATOM   4414  O   SER A 969      -1.732  31.356  54.670  1.00 62.26           O
ATOM   4415  CB  SER A 969      -1.961  33.170  52.038  1.00 61.45           C
ATOM   4416  OG  SER A 969      -1.882  32.837  50.662  1.00 63.73           O
ATOM   4417  H   SER A 969      -4.480  33.446  52.167  1.00  0.00           H
ATOM   4418  HA  SER A 969      -2.673  31.190  52.342  1.00  0.00           H
ATOM   4419  HB2 SER A 969      -2.215  34.203  52.187  1.00  0.00           H
ATOM   4420  HB3 SER A 969      -0.943  33.069  52.419  1.00  0.00           H
ATOM   4421  HG  SER A 969      -2.714  33.064  50.269  1.00  0.00           H
ATOM   4422  N   LYS A 970      -3.182  33.045  54.961  1.00 61.57           N
ATOM   4423  CA  LYS A 970      -3.047  33.046  56.394  1.00 61.35           C
ATOM   4424  C   LYS A 970      -3.735  31.891  57.067  1.00 61.12           C
ATOM   4425  O   LYS A 970      -3.183  31.246  57.910  1.00 61.92           O
ATOM   4426  CB  LYS A 970      -3.551  34.353  56.937  1.00 61.84           C
ATOM   4427  CG  LYS A 970      -3.916  34.294  58.354  1.00 64.24           C
ATOM   4428  CD  LYS A 970      -4.783  35.458  58.700  1.00 67.89           C
ATOM   4429  CE  LYS A 970      -5.212  35.422  60.136  1.00 69.53           C
ATOM   4430  NZ  LYS A 970      -6.408  36.281  60.313  1.00 72.47           N1+
ATOM   4431  H   LYS A 970      -3.805  33.716  54.529  1.00  0.00           H
ATOM   4432  HA  LYS A 970      -1.990  32.997  56.648  1.00  0.00           H
ATOM   4433  HB2 LYS A 970      -2.807  35.134  56.773  1.00  0.00           H
ATOM   4434  HB3 LYS A 970      -4.421  34.665  56.361  1.00  0.00           H
ATOM   4435  HG2 LYS A 970      -4.542  33.465  58.676  1.00  0.00           H
ATOM   4436  HG3 LYS A 970      -3.019  34.273  58.975  1.00  0.00           H
ATOM   4437  HD2 LYS A 970      -4.275  36.399  58.485  1.00  0.00           H
ATOM   4438  HD3 LYS A 970      -5.671  35.435  58.063  1.00  0.00           H
ATOM   4439  HE2 LYS A 970      -5.489  34.417  60.444  1.00  0.00           H
ATOM   4440  HE3 LYS A 970      -4.408  35.754  60.794  1.00  0.00           H
ATOM   4441  HZ1 LYS A 970      -6.713  36.251  61.275  1.00  0.00           H
ATOM   4442  HZ2 LYS A 970      -6.184  37.232  60.058  1.00  0.00           H
ATOM   4443  HZ3 LYS A 970      -7.153  35.949  59.715  1.00  0.00           H
ATOM   4444  N   MET A 971      -4.941  31.585  56.663  1.00 60.90           N
ATOM   4445  CA  MET A 971      -5.619  30.452  57.228  1.00 60.31           C
ATOM   4446  C   MET A 971      -4.904  29.202  56.832  1.00 60.63           C
ATOM   4447  O   MET A 971      -5.116  28.167  57.387  1.00 60.66           O
ATOM   4448  CB  MET A 971      -7.052  30.384  56.763  1.00 59.85           C
ATOM   4449  CG  MET A 971      -7.806  31.646  56.906  1.00 59.65           C
ATOM   4450  SD  MET A 971      -9.481  31.427  56.389  1.00 61.24           S
ATOM   4451  CE  MET A 971     -10.318  32.361  57.614  1.00 59.11           C
ATOM   4452  H   MET A 971      -5.398  32.136  55.947  1.00  0.00           H
ATOM   4453  HA  MET A 971      -5.590  30.545  58.307  1.00  0.00           H
ATOM   4454  HB2 MET A 971      -7.071  30.118  55.704  1.00  0.00           H
ATOM   4455  HB3 MET A 971      -7.575  29.576  57.272  1.00  0.00           H
ATOM   4456  HG2 MET A 971      -7.789  31.925  57.959  1.00  0.00           H
ATOM   4457  HG3 MET A 971      -7.395  32.482  56.369  1.00  0.00           H
ATOM   4458  HE1 MET A 971     -10.734  31.708  58.370  1.00  0.00           H
ATOM   4459  HE2 MET A 971      -9.683  33.113  58.081  1.00  0.00           H
ATOM   4460  HE3 MET A 971     -11.150  32.881  57.144  1.00  0.00           H
ATOM   4461  N   ALA A 972      -4.097  29.299  55.802  1.00 61.10           N
ATOM   4462  CA  ALA A 972      -3.397  28.155  55.242  1.00 62.32           C
ATOM   4463  C   ALA A 972      -2.446  27.534  56.255  1.00 63.29           C
ATOM   4464  O   ALA A 972      -2.346  26.310  56.379  1.00 63.07           O
ATOM   4465  CB  ALA A 972      -2.657  28.570  53.990  1.00 62.38           C
ATOM   4466  H   ALA A 972      -3.999  30.191  55.337  1.00  0.00           H
ATOM   4467  HA  ALA A 972      -4.142  27.406  54.964  1.00  0.00           H
ATOM   4468  HB1 ALA A 972      -2.328  27.660  53.487  1.00  0.00           H
ATOM   4469  HB2 ALA A 972      -3.233  29.079  53.235  1.00  0.00           H
ATOM   4470  HB3 ALA A 972      -1.731  29.097  54.190  1.00  0.00           H
ATOM   4471  N   ARG A 973      -1.742  28.365  56.986  1.00 64.50           N
ATOM   4472  CA  ARG A 973      -0.788  27.900  57.974  1.00 65.36           C
ATOM   4473  C   ARG A 973      -1.380  27.143  59.127  1.00 65.53           C
ATOM   4474  O   ARG A 973      -0.751  26.264  59.671  1.00 65.46           O
ATOM   4475  CB  ARG A 973       0.031  29.045  58.476  1.00 66.38           C
ATOM   4476  CG  ARG A 973       0.265  30.011  57.422  1.00 67.62           C
ATOM   4477  CD  ARG A 973       0.275  31.351  57.993  1.00 71.44           C
ATOM   4478  NE  ARG A 973       1.630  31.705  58.297  1.00 73.70           N
ATOM   4479  CZ  ARG A 973       2.248  32.718  57.745  1.00 74.06           C
ATOM   4480  NH1 ARG A 973       1.609  33.475  56.876  1.00 73.75           N
ATOM   4481  NH2 ARG A 973       3.498  32.965  58.067  1.00 74.63           N1+
ATOM   4482  H   ARG A 973      -1.877  29.359  56.870  1.00  0.00           H
ATOM   4483  HA  ARG A 973      -0.105  27.222  57.456  1.00  0.00           H
ATOM   4484  HB2 ARG A 973      -0.505  29.484  59.320  1.00  0.00           H
ATOM   4485  HB3 ARG A 973       0.977  28.692  58.891  1.00  0.00           H
ATOM   4486  HG2 ARG A 973       1.221  29.765  56.954  1.00  0.00           H
ATOM   4487  HG3 ARG A 973      -0.385  30.100  56.557  1.00  0.00           H
ATOM   4488  HD2 ARG A 973      -0.191  32.013  57.272  1.00  0.00           H
ATOM   4489  HD3 ARG A 973      -0.340  31.486  58.884  1.00  0.00           H
ATOM   4490  HE  ARG A 973       2.111  31.132  58.976  1.00  0.00           H
ATOM   4491 HH11 ARG A 973       2.071  34.261  56.441  1.00  0.00           H
ATOM   4492 HH12 ARG A 973       0.656  33.262  56.621  1.00  0.00           H
ATOM   4493 HH21 ARG A 973       3.980  32.379  58.733  1.00  0.00           H
ATOM   4494 HH22 ARG A 973       3.989  33.744  57.653  1.00  0.00           H
ATOM   4495  N   ASP A 974      -2.564  27.536  59.550  1.00 65.50           N
ATOM   4496  CA  ASP A 974      -3.205  26.844  60.651  1.00 65.52           C
ATOM   4497  C   ASP A 974      -4.567  26.442  60.177  1.00 64.56           C
ATOM   4498  O   ASP A 974      -5.542  26.976  60.611  1.00 65.54           O
ATOM   4499  CB  ASP A 974      -3.362  27.789  61.833  1.00 65.49           C
ATOM   4500  CG  ASP A 974      -3.719  27.074  63.100  1.00 66.64           C
ATOM   4501  OD1 ASP A 974      -4.230  25.952  63.017  1.00 67.74           O
ATOM   4502  OD2 ASP A 974      -3.496  27.632  64.179  1.00 64.25           O1-
ATOM   4503  H   ASP A 974      -3.060  28.276  59.075  1.00  0.00           H
ATOM   4504  HA  ASP A 974      -2.674  25.952  60.990  1.00  0.00           H
ATOM   4505  HB2 ASP A 974      -2.399  28.269  62.016  1.00  0.00           H
ATOM   4506  HB3 ASP A 974      -4.055  28.612  61.652  1.00  0.00           H
ATOM   4507  N   PRO A 975      -4.629  25.482  59.288  1.00 63.07           N
ATOM   4508  CA  PRO A 975      -5.860  25.149  58.615  1.00 62.91           C
ATOM   4509  C   PRO A 975      -6.938  24.671  59.513  1.00 62.70           C
ATOM   4510  O   PRO A 975      -8.079  24.984  59.301  1.00 62.70           O
ATOM   4511  CB  PRO A 975      -5.442  24.023  57.686  1.00 62.40           C
ATOM   4512  CG  PRO A 975      -4.155  23.661  58.069  1.00 62.16           C
ATOM   4513  CD  PRO A 975      -3.509  24.814  58.650  1.00 62.54           C
ATOM   4514  HA  PRO A 975      -6.230  26.004  58.052  1.00  0.00           H
ATOM   4515  HB2 PRO A 975      -6.139  23.288  57.433  1.00  0.00           H
ATOM   4516  HB3 PRO A 975      -5.299  24.490  56.712  1.00  0.00           H
ATOM   4517  HG2 PRO A 975      -4.220  22.870  58.818  1.00  0.00           H
ATOM   4518  HG3 PRO A 975      -3.579  23.252  57.239  1.00  0.00           H
ATOM   4519  HD2 PRO A 975      -2.659  24.558  59.280  1.00  0.00           H
ATOM   4520  HD3 PRO A 975      -3.332  25.583  58.006  1.00  0.00           H
ATOM   4521  N   GLN A 976      -6.575  23.889  60.496  1.00 62.81           N
ATOM   4522  CA  GLN A 976      -7.533  23.251  61.361  1.00 62.35           C
ATOM   4523  C   GLN A 976      -8.337  24.247  62.120  1.00 60.21           C
ATOM   4524  O   GLN A 976      -9.475  24.021  62.429  1.00 59.40           O
ATOM   4525  CB  GLN A 976      -6.810  22.326  62.294  1.00 63.33           C
ATOM   4526  CG  GLN A 976      -5.723  21.626  61.600  1.00 64.46           C
ATOM   4527  CD  GLN A 976      -5.484  20.298  62.170  1.00 66.11           C
ATOM   4528  OE1 GLN A 976      -6.087  19.930  63.162  1.00 67.15           O
ATOM   4529  NE2 GLN A 976      -4.592  19.552  61.557  1.00 66.90           N
ATOM   4530  H   GLN A 976      -5.598  23.669  60.620  1.00  0.00           H
ATOM   4531  HA  GLN A 976      -8.206  22.658  60.736  1.00  0.00           H
ATOM   4532  HB2 GLN A 976      -6.388  22.866  63.145  1.00  0.00           H
ATOM   4533  HB3 GLN A 976      -7.585  21.672  62.700  1.00  0.00           H
ATOM   4534  HG2 GLN A 976      -5.978  21.438  60.554  1.00  0.00           H
ATOM   4535  HG3 GLN A 976      -4.800  22.209  61.616  1.00  0.00           H
ATOM   4536 HE21 GLN A 976      -4.118  19.894  60.735  1.00  0.00           H
ATOM   4537 HE22 GLN A 976      -4.386  18.630  61.920  1.00  0.00           H
ATOM   4538  N   ARG A 977      -7.719  25.353  62.443  1.00 58.41           N
ATOM   4539  CA  ARG A 977      -8.376  26.382  63.189  1.00 57.47           C
ATOM   4540  C   ARG A 977      -9.539  26.936  62.439  1.00 57.23           C
ATOM   4541  O   ARG A 977     -10.448  27.464  63.032  1.00 56.85           O
ATOM   4542  CB  ARG A 977      -7.413  27.500  63.444  1.00 59.00           C
ATOM   4543  CG  ARG A 977      -7.954  28.543  64.310  1.00 61.56           C
ATOM   4544  CD  ARG A 977      -7.013  29.676  64.423  1.00 63.99           C
ATOM   4545  NE  ARG A 977      -7.608  30.715  65.231  1.00 67.37           N
ATOM   4546  CZ  ARG A 977      -6.974  31.793  65.644  1.00 69.06           C
ATOM   4547  NH1 ARG A 977      -5.718  31.994  65.329  1.00 70.98           N
ATOM   4548  NH2 ARG A 977      -7.611  32.672  66.369  1.00 70.12           N1+
ATOM   4549  H   ARG A 977      -6.754  25.489  62.172  1.00  0.00           H
ATOM   4550  HA  ARG A 977      -8.719  25.969  64.140  1.00  0.00           H
ATOM   4551  HB2 ARG A 977      -6.520  27.092  63.919  1.00  0.00           H
ATOM   4552  HB3 ARG A 977      -7.080  27.933  62.500  1.00  0.00           H
ATOM   4553  HG2 ARG A 977      -8.874  28.983  63.934  1.00  0.00           H
ATOM   4554  HG3 ARG A 977      -8.178  28.132  65.296  1.00  0.00           H
ATOM   4555  HD2 ARG A 977      -6.080  29.344  64.880  1.00  0.00           H
ATOM   4556  HD3 ARG A 977      -6.771  30.086  63.443  1.00  0.00           H
ATOM   4557  HE  ARG A 977      -8.584  30.598  65.462  1.00  0.00           H
ATOM   4558 HH11 ARG A 977      -5.224  31.305  64.780  1.00  0.00           H
ATOM   4559 HH12 ARG A 977      -5.229  32.819  65.645  1.00  0.00           H
ATOM   4560 HH21 ARG A 977      -8.583  32.531  66.603  1.00  0.00           H
ATOM   4561 HH22 ARG A 977      -7.141  33.501  66.702  1.00  0.00           H
ATOM   4562  N   TYR A 978      -9.481  26.894  61.124  1.00 56.10           N
ATOM   4563  CA  TYR A 978     -10.520  27.569  60.310  1.00 54.43           C
ATOM   4564  C   TYR A 978     -11.490  26.672  59.605  1.00 53.51           C
ATOM   4565  O   TYR A 978     -12.617  27.054  59.353  1.00 53.09           O
ATOM   4566  CB  TYR A 978      -9.911  28.476  59.278  1.00 54.83           C
ATOM   4567  CG  TYR A 978      -9.006  29.500  59.867  1.00 56.61           C
ATOM   4568  CD1 TYR A 978      -9.509  30.694  60.383  1.00 56.87           C
ATOM   4569  CD2 TYR A 978      -7.638  29.271  59.924  1.00 56.65           C
ATOM   4570  CE1 TYR A 978      -8.659  31.634  60.923  1.00 57.35           C
ATOM   4571  CE2 TYR A 978      -6.802  30.187  60.454  1.00 57.06           C
ATOM   4572  CZ  TYR A 978      -7.305  31.371  60.946  1.00 57.18           C
ATOM   4573  OH  TYR A 978      -6.430  32.287  61.473  1.00 58.05           O
ATOM   4574  H   TYR A 978      -8.702  26.445  60.662  1.00  0.00           H
ATOM   4575  HA  TYR A 978     -11.129  28.235  60.921  1.00  0.00           H
ATOM   4576  HB2 TYR A 978      -9.358  27.899  58.534  1.00  0.00           H
ATOM   4577  HB3 TYR A 978     -10.682  29.008  58.735  1.00  0.00           H
ATOM   4578  HD1 TYR A 978     -10.572  30.868  60.393  1.00  0.00           H
ATOM   4579  HD2 TYR A 978      -7.240  28.354  59.519  1.00  0.00           H
ATOM   4580  HE1 TYR A 978      -9.052  32.556  61.326  1.00  0.00           H
ATOM   4581  HE2 TYR A 978      -5.742  29.982  60.493  1.00  0.00           H
ATOM   4582  HH  TYR A 978      -5.534  31.989  61.447  1.00  0.00           H
ATOM   4583  N   LEU A 979     -11.042  25.478  59.271  1.00 53.60           N
ATOM   4584  CA  LEU A 979     -11.921  24.508  58.670  1.00 53.04           C
ATOM   4585  C   LEU A 979     -11.916  23.295  59.548  1.00 53.42           C
ATOM   4586  O   LEU A 979     -10.847  22.778  59.937  1.00 52.42           O
ATOM   4587  CB  LEU A 979     -11.459  24.148  57.258  1.00 53.35           C
ATOM   4588  CG  LEU A 979     -11.836  25.087  56.116  1.00 52.06           C
ATOM   4589  CD1 LEU A 979     -11.238  24.606  54.828  1.00 52.05           C
ATOM   4590  CD2 LEU A 979     -13.307  25.164  55.974  1.00 52.79           C
ATOM   4591  H   LEU A 979     -10.095  25.201  59.497  1.00  0.00           H
ATOM   4592  HA  LEU A 979     -12.953  24.848  58.661  1.00  0.00           H
ATOM   4593  HB2 LEU A 979     -10.375  24.049  57.280  1.00  0.00           H
ATOM   4594  HB3 LEU A 979     -11.834  23.155  56.996  1.00  0.00           H
ATOM   4595  HG  LEU A 979     -11.438  26.075  56.352  1.00  0.00           H
ATOM   4596 HD11 LEU A 979     -11.267  25.402  54.095  1.00  0.00           H
ATOM   4597 HD12 LEU A 979     -10.188  24.344  54.957  1.00  0.00           H
ATOM   4598 HD13 LEU A 979     -11.734  23.723  54.424  1.00  0.00           H
ATOM   4599 HD21 LEU A 979     -13.567  26.176  55.662  1.00  0.00           H
ATOM   4600 HD22 LEU A 979     -13.659  24.542  55.156  1.00  0.00           H
ATOM   4601 HD23 LEU A 979     -13.875  24.993  56.874  1.00  0.00           H
ATOM   4602  N   VAL A 980     -13.118  22.847  59.865  1.00 54.36           N
ATOM   4603  CA  VAL A 980     -13.265  21.719  60.734  1.00 56.24           C
ATOM   4604  C   VAL A 980     -13.700  20.535  59.934  1.00 57.91           C
ATOM   4605  O   VAL A 980     -14.833  20.475  59.430  1.00 57.67           O
ATOM   4606  CB  VAL A 980     -14.334  21.962  61.790  1.00 56.44           C
ATOM   4607  CG1 VAL A 980     -15.118  20.643  62.078  1.00 57.07           C
ATOM   4608  CG2 VAL A 980     -13.731  22.543  63.055  1.00 55.09           C
ATOM   4609  H   VAL A 980     -13.949  23.287  59.490  1.00  0.00           H
ATOM   4610  HA  VAL A 980     -12.342  21.456  61.258  1.00  0.00           H
ATOM   4611  HB  VAL A 980     -15.062  22.683  61.413  1.00  0.00           H
ATOM   4612 HG11 VAL A 980     -15.615  20.771  63.040  1.00  0.00           H
ATOM   4613 HG12 VAL A 980     -15.968  20.434  61.429  1.00  0.00           H
ATOM   4614 HG13 VAL A 980     -14.501  19.755  62.236  1.00  0.00           H
ATOM   4615 HG21 VAL A 980     -14.503  22.787  63.785  1.00  0.00           H
ATOM   4616 HG22 VAL A 980     -13.038  21.844  63.525  1.00  0.00           H
ATOM   4617 HG23 VAL A 980     -13.183  23.462  62.841  1.00  0.00           H
ATOM   4618  N   ILE A 981     -12.807  19.567  59.843  1.00 60.25           N
ATOM   4619  CA  ILE A 981     -13.126  18.352  59.135  1.00 62.74           C
ATOM   4620  C   ILE A 981     -12.929  17.208  60.102  1.00 65.45           C
ATOM   4621  O   ILE A 981     -11.931  17.151  60.811  1.00 65.92           O
ATOM   4622  CB  ILE A 981     -12.230  18.165  57.897  1.00 62.33           C
ATOM   4623  CG1 ILE A 981     -12.476  19.280  56.884  1.00 61.09           C
ATOM   4624  CG2 ILE A 981     -12.523  16.819  57.238  1.00 62.93           C
ATOM   4625  CD1 ILE A 981     -11.287  19.536  56.033  1.00 60.00           C
ATOM   4626  H   ILE A 981     -11.901  19.653  60.282  1.00  0.00           H
ATOM   4627  HA  ILE A 981     -14.163  18.311  58.794  1.00  0.00           H
ATOM   4628  HB  ILE A 981     -11.192  18.184  58.225  1.00  0.00           H
ATOM   4629 HG12 ILE A 981     -13.354  19.074  56.271  1.00  0.00           H
ATOM   4630 HG13 ILE A 981     -12.688  20.225  57.379  1.00  0.00           H
ATOM   4631 HG21 ILE A 981     -11.996  16.729  56.288  1.00  0.00           H
ATOM   4632 HG22 ILE A 981     -12.185  15.974  57.838  1.00  0.00           H
ATOM   4633 HG23 ILE A 981     -13.586  16.688  57.032  1.00  0.00           H
ATOM   4634 HD11 ILE A 981     -11.405  20.464  55.478  1.00  0.00           H
ATOM   4635 HD12 ILE A 981     -10.431  19.623  56.689  1.00  0.00           H
ATOM   4636 HD13 ILE A 981     -11.118  18.724  55.327  1.00  0.00           H
ATOM   4637  N   GLN A 982     -13.882  16.291  60.131  1.00 68.48           N
ATOM   4638  CA  GLN A 982     -13.797  15.163  61.049  1.00 71.09           C
ATOM   4639  C   GLN A 982     -12.706  14.163  60.651  1.00 72.74           C
ATOM   4640  O   GLN A 982     -12.795  13.500  59.612  1.00 72.98           O
ATOM   4641  CB  GLN A 982     -15.144  14.467  61.106  1.00 71.17           C
ATOM   4642  CG  GLN A 982     -15.873  14.490  59.756  1.00 71.82           C
ATOM   4643  CD  GLN A 982     -16.903  13.376  59.702  1.00 74.93           C
ATOM   4644  OE1 GLN A 982     -17.438  12.942  60.733  1.00 74.96           O
ATOM   4645  NE2 GLN A 982     -17.180  12.889  58.497  1.00 76.61           N
ATOM   4646  H   GLN A 982     -14.684  16.368  59.524  1.00  0.00           H
ATOM   4647  HA  GLN A 982     -13.581  15.534  62.054  1.00  0.00           H
ATOM   4648  HB2 GLN A 982     -15.017  13.450  61.486  1.00  0.00           H
ATOM   4649  HB3 GLN A 982     -15.772  14.972  61.841  1.00  0.00           H
ATOM   4650  HG2 GLN A 982     -16.374  15.445  59.593  1.00  0.00           H
ATOM   4651  HG3 GLN A 982     -15.180  14.340  58.927  1.00  0.00           H
ATOM   4652 HE21 GLN A 982     -16.716  13.260  57.681  1.00  0.00           H
ATOM   4653 HE22 GLN A 982     -17.850  12.139  58.407  1.00  0.00           H
ATOM   4654  N   GLY A 983     -11.686  14.057  61.500  1.00 74.00           N
ATOM   4655  CA  GLY A 983     -10.598  13.120  61.279  1.00 75.91           C
ATOM   4656  C   GLY A 983      -9.541  13.787  60.448  1.00 77.28           C
ATOM   4657  O   GLY A 983      -8.806  13.134  59.721  1.00 76.46           O
ATOM   4658  H   GLY A 983     -11.671  14.626  62.334  1.00  0.00           H
ATOM   4659  HA2 GLY A 983     -10.167  12.844  62.242  1.00  0.00           H
ATOM   4660  HA3 GLY A 983     -10.934  12.196  60.804  1.00  0.00           H
ATOM   4661  N   ASP A 984      -9.454  15.087  60.574  1.00 79.65           N
ATOM   4662  CA  ASP A 984      -8.501  15.814  59.798  1.00 82.68           C
ATOM   4663  C   ASP A 984      -7.131  15.329  60.138  1.00 85.53           C
ATOM   4664  O   ASP A 984      -6.251  15.299  59.296  1.00 86.66           O
ATOM   4665  CB  ASP A 984      -8.598  17.294  60.052  1.00 80.98           C
ATOM   4666  CG  ASP A 984      -8.323  18.076  58.833  1.00 80.64           C
ATOM   4667  OD1 ASP A 984      -8.708  17.622  57.768  1.00 79.42           O
ATOM   4668  OD2 ASP A 984      -7.702  19.129  58.913  1.00 81.39           O1-
ATOM   4669  H   ASP A 984     -10.102  15.594  61.160  1.00  0.00           H
ATOM   4670  HA  ASP A 984      -8.706  15.534  58.762  1.00  0.00           H
ATOM   4671  HB2 ASP A 984      -9.600  17.576  60.359  1.00  0.00           H
ATOM   4672  HB3 ASP A 984      -7.946  17.623  60.865  1.00  0.00           H
ATOM   4673  N   GLU A 985      -6.922  14.928  61.372  1.00 87.94           N
ATOM   4674  CA  GLU A 985      -5.588  14.517  61.741  1.00 90.40           C
ATOM   4675  C   GLU A 985      -5.230  13.357  60.855  1.00 91.84           C
ATOM   4676  O   GLU A 985      -4.098  13.222  60.432  1.00 92.26           O
ATOM   4677  CB  GLU A 985      -5.491  14.152  63.213  1.00 91.16           C
ATOM   4678  CG  GLU A 985      -5.660  15.341  64.129  1.00 92.23           C
ATOM   4679  CD  GLU A 985      -4.381  16.098  64.356  1.00 93.09           C
ATOM   4680  OE1 GLU A 985      -3.739  16.517  63.382  1.00 93.08           O
ATOM   4681  OE2 GLU A 985      -4.020  16.288  65.525  1.00 93.11           O1-
ATOM   4682  H   GLU A 985      -7.653  14.967  62.067  1.00  0.00           H
ATOM   4683  HA  GLU A 985      -4.890  15.325  61.517  1.00  0.00           H
ATOM   4684  HB2 GLU A 985      -6.255  13.411  63.452  1.00  0.00           H
ATOM   4685  HB3 GLU A 985      -4.537  13.661  63.418  1.00  0.00           H
ATOM   4686  HG2 GLU A 985      -6.424  16.029  63.766  1.00  0.00           H
ATOM   4687  HG3 GLU A 985      -6.015  14.986  65.097  1.00  0.00           H
ATOM   4688  N   ARG A 986      -6.211  12.522  60.568  1.00 93.21           N
ATOM   4689  CA  ARG A 986      -5.985  11.371  59.719  1.00 94.19           C
ATOM   4690  C   ARG A 986      -5.270  11.737  58.441  1.00 94.97           C
ATOM   4691  O   ARG A 986      -4.296  11.120  58.053  1.00 94.41           O
ATOM   4692  CB  ARG A 986      -7.325  10.755  59.359  1.00 93.86           C
ATOM   4693  CG  ARG A 986      -7.219   9.500  58.576  1.00 94.85           C
ATOM   4694  CD  ARG A 986      -8.175   9.437  57.409  1.00 95.04           C
ATOM   4695  NE  ARG A 986      -7.615   8.590  56.375  1.00 97.14           N
ATOM   4696  CZ  ARG A 986      -6.950   9.038  55.324  1.00 98.45           C
ATOM   4697  NH1 ARG A 986      -6.798  10.334  55.145  1.00 98.38           N
ATOM   4698  NH2 ARG A 986      -6.448   8.184  54.450  1.00 99.30           N1+
ATOM   4699  H   ARG A 986      -7.147  12.711  60.897  1.00  0.00           H
ATOM   4700  HA  ARG A 986      -5.386  10.648  60.276  1.00  0.00           H
ATOM   4701  HB2 ARG A 986      -7.950  10.603  60.240  1.00  0.00           H
ATOM   4702  HB3 ARG A 986      -7.852  11.427  58.702  1.00  0.00           H
ATOM   4703  HG2 ARG A 986      -6.204   9.303  58.232  1.00  0.00           H
ATOM   4704  HG3 ARG A 986      -7.427   8.665  59.247  1.00  0.00           H
ATOM   4705  HD2 ARG A 986      -9.083   8.943  57.757  1.00  0.00           H
ATOM   4706  HD3 ARG A 986      -8.550  10.366  57.010  1.00  0.00           H
ATOM   4707  HE  ARG A 986      -7.726   7.594  56.502  1.00  0.00           H
ATOM   4708 HH11 ARG A 986      -7.167  10.976  55.830  1.00  0.00           H
ATOM   4709 HH12 ARG A 986      -6.287  10.695  54.352  1.00  0.00           H
ATOM   4710 HH21 ARG A 986      -6.548   7.189  54.597  1.00  0.00           H
ATOM   4711 HH22 ARG A 986      -5.947   8.514  53.639  1.00  0.00           H
ATOM   4712  N   MET A 987      -5.799  12.729  57.764  1.00 96.43           N
ATOM   4713  CA  MET A 987      -5.372  13.076  56.428  1.00 98.20           C
ATOM   4714  C   MET A 987      -4.105  13.883  56.197  1.00 99.77           C
ATOM   4715  O   MET A 987      -3.621  14.597  57.067  1.00100.20           O
ATOM   4716  CB  MET A 987      -6.537  13.702  55.706  1.00 97.67           C
ATOM   4717  CG  MET A 987      -7.723  12.834  55.755  1.00 97.37           C
ATOM   4718  SD  MET A 987      -9.122  13.830  56.056  1.00 97.66           S
ATOM   4719  CE  MET A 987     -10.412  12.642  55.827  1.00 98.05           C
ATOM   4720  H   MET A 987      -6.563  13.251  58.171  1.00  0.00           H
ATOM   4721  HA  MET A 987      -5.171  12.136  55.913  1.00  0.00           H
ATOM   4722  HB2 MET A 987      -6.729  14.668  56.180  1.00  0.00           H
ATOM   4723  HB3 MET A 987      -6.301  13.930  54.665  1.00  0.00           H
ATOM   4724  HG2 MET A 987      -7.905  12.398  54.775  1.00  0.00           H
ATOM   4725  HG3 MET A 987      -7.744  12.117  56.552  1.00  0.00           H
ATOM   4726  HE1 MET A 987     -11.199  13.108  55.236  1.00  0.00           H
ATOM   4727  HE2 MET A 987     -10.007  11.735  55.386  1.00  0.00           H
ATOM   4728  HE3 MET A 987     -10.832  12.374  56.796  1.00  0.00           H
ATOM   4729  N   HIS A 988      -3.600  13.761  54.978  1.00101.09           N
ATOM   4730  CA  HIS A 988      -2.345  14.371  54.554  1.00102.54           C
ATOM   4731  C   HIS A 988      -2.302  15.886  54.599  1.00102.53           C
ATOM   4732  O   HIS A 988      -1.422  16.492  53.999  1.00102.10           O
ATOM   4733  OXT HIS A 988      -3.271  16.465  55.321  1.00 -1.00           O1-
ATOM   4734  CB  HIS A 988      -2.004  13.889  53.153  1.00103.06           C
ATOM   4735  CG  HIS A 988      -2.558  12.540  52.848  1.00103.64           C
ATOM   4736  ND1 HIS A 988      -3.787  12.020  53.058  1.00103.71           N
ATOM   4737  CD2 HIS A 988      -1.807  11.531  52.291  1.00103.72           C
ATOM   4738  CE1 HIS A 988      -3.759  10.725  52.612  1.00103.83           C
ATOM   4739  NE2 HIS A 988      -2.553  10.454  52.155  1.00103.96           N
ATOM   4740  H   HIS A 988      -4.053  13.142  54.317  1.00  0.00           H
ATOM   4741  HA  HIS A 988      -1.577  13.991  55.230  1.00  0.00           H
ATOM   4742  HB2 HIS A 988      -2.438  14.548  52.401  1.00  0.00           H
ATOM   4743  HB3 HIS A 988      -0.925  13.902  52.991  1.00  0.00           H
ATOM   4744  HD2 HIS A 988      -0.771  11.529  51.984  1.00  0.00           H
ATOM   4745  HE1 HIS A 988      -4.590  10.036  52.636  1.00  0.00           H
ATOM   4746  HE2 HIS A 988      -2.250   9.570  51.771  1.00  0.00           H
ATOM   4747  N   GLU A1004      -4.105   6.488  29.675  1.00117.38           N1+
ATOM   4748  CA  GLU A1004      -4.164   6.502  28.220  1.00117.78           C
ATOM   4749  C   GLU A1004      -3.925   5.123  27.663  1.00117.90           C
ATOM   4750  O   GLU A1004      -4.510   4.154  28.114  1.00117.88           O
ATOM   4751  CB  GLU A1004      -3.114   7.446  27.661  1.00117.68           C
ATOM   4752  CG  GLU A1004      -3.045   7.575  26.131  1.00 -1.00           C
ATOM   4753  CD  GLU A1004      -1.987   8.526  25.581  1.00 -1.00           C
ATOM   4754  OE1 GLU A1004      -0.853   8.058  25.332  1.00 -1.00           O
ATOM   4755  OE2 GLU A1004      -2.335   9.714  25.413  1.00 -1.00           O1-
ATOM   4756  H1  GLU A1004      -4.702   5.763  30.050  1.00  0.00           H
ATOM   4757  H2  GLU A1004      -3.172   6.273  29.999  1.00  0.00           H
ATOM   4758  H3  GLU A1004      -3.194   6.170  29.972  1.00 -1.00           H
ATOM   4759  HA  GLU A1004      -5.158   6.829  27.913  1.00  0.00           H
ATOM   4760  HB2 GLU A1004      -3.315   8.459  28.077  1.00  0.00           H
ATOM   4761  HB3 GLU A1004      -2.120   7.092  28.015  1.00  0.00           H
ATOM   4762  HG2 GLU A1004      -2.843   6.564  25.714  1.00 -1.00           H
ATOM   4763  HG3 GLU A1004      -4.038   7.930  25.775  1.00 -1.00           H
ATOM   4764  N   GLU A1005      -3.047   5.015  26.682  1.00118.05           N
ATOM   4765  CA  GLU A1005      -2.783   3.704  26.136  1.00118.04           C
ATOM   4766  C   GLU A1005      -2.227   2.873  27.252  1.00117.84           C
ATOM   4767  O   GLU A1005      -2.653   1.756  27.491  1.00117.80           O
ATOM   4768  CB  GLU A1005      -1.716   3.811  25.049  1.00117.80           C
ATOM   4769  CG  GLU A1005      -1.731   2.694  24.026  1.00117.80           C
ATOM   4770  CD  GLU A1005      -0.677   2.772  22.926  1.00 -1.00           C
ATOM   4771  OE1 GLU A1005       0.425   2.216  23.133  1.00 -1.00           O
ATOM   4772  OE2 GLU A1005      -0.997   3.387  21.887  1.00 -1.00           O1-
ATOM   4773  H   GLU A1005      -2.557   5.821  26.323  1.00  0.00           H
ATOM   4774  HA  GLU A1005      -3.701   3.268  25.735  1.00  0.00           H
ATOM   4775  HB2 GLU A1005      -1.888   4.732  24.490  1.00  0.00           H
ATOM   4776  HB3 GLU A1005      -0.709   3.930  25.452  1.00  0.00           H
ATOM   4777  HG2 GLU A1005      -1.571   1.739  24.527  1.00  0.00           H
ATOM   4778  HG3 GLU A1005      -2.695   2.680  23.517  1.00  0.00           H
ATOM   4779  N   ASP A1006      -1.280   3.459  27.956  1.00117.67           N
ATOM   4780  CA  ASP A1006      -0.638   2.831  29.090  1.00117.36           C
ATOM   4781  C   ASP A1006      -0.409   3.974  30.044  1.00116.81           C
ATOM   4782  O   ASP A1006      -0.203   5.094  29.608  1.00117.01           O
ATOM   4783  CB  ASP A1006       0.689   2.226  28.653  1.00117.68           C
ATOM   4784  CG  ASP A1006       0.676   1.805  27.204  1.00118.38           C
ATOM   4785  OD1 ASP A1006      -0.420   1.582  26.677  1.00118.82           O
ATOM   4786  OD2 ASP A1006       1.748   1.693  26.586  1.00118.03           O1-
ATOM   4787  H   ASP A1006      -0.989   4.394  27.712  1.00  0.00           H
ATOM   4788  HA  ASP A1006      -1.280   2.084  29.563  1.00  0.00           H
ATOM   4789  HB2 ASP A1006       1.608   2.638  29.025  1.00  0.00           H
ATOM   4790  HB3 ASP A1006       0.725   1.267  29.170  1.00  0.00           H
ATOM   4791  N   MET A1007      -0.432   3.740  31.342  1.00115.90           N
ATOM   4792  CA  MET A1007      -0.267   4.879  32.231  1.00114.91           C
ATOM   4793  C   MET A1007       1.090   5.540  32.005  1.00114.11           C
ATOM   4794  O   MET A1007       1.188   6.760  32.007  1.00114.04           O
ATOM   4795  CB  MET A1007      -0.470   4.497  33.693  1.00115.07           C
ATOM   4796  CG  MET A1007      -1.652   3.595  33.965  1.00114.65           C
ATOM   4797  SD  MET A1007      -1.782   3.318  35.728  1.00114.78           S
ATOM   4798  CE  MET A1007      -1.498   1.565  35.864  1.00113.68           C
ATOM   4799  H   MET A1007      -0.594   2.816  31.714  1.00  0.00           H
ATOM   4800  HA  MET A1007      -1.044   5.610  31.990  1.00  0.00           H
ATOM   4801  HB2 MET A1007       0.426   3.994  34.062  1.00  0.00           H
ATOM   4802  HB3 MET A1007      -0.563   5.410  34.284  1.00  0.00           H
ATOM   4803  HG2 MET A1007      -2.574   4.060  33.615  1.00  0.00           H
ATOM   4804  HG3 MET A1007      -1.558   2.636  33.455  1.00  0.00           H
ATOM   4805  HE1 MET A1007      -1.543   1.257  36.909  1.00  0.00           H
ATOM   4806  HE2 MET A1007      -2.254   1.011  35.307  1.00  0.00           H
ATOM   4807  HE3 MET A1007      -0.515   1.308  35.470  1.00  0.00           H
ATOM   4808  N   ASP A1008       2.132   4.748  31.795  1.00112.81           N
ATOM   4809  CA  ASP A1008       3.432   5.312  31.466  1.00111.51           C
ATOM   4810  C   ASP A1008       4.072   4.583  30.289  1.00110.49           C
ATOM   4811  O   ASP A1008       4.147   3.373  30.297  1.00110.54           O
ATOM   4812  CB  ASP A1008       4.354   5.254  32.686  1.00111.54           C
ATOM   4813  CG  ASP A1008       4.983   6.600  33.022  1.00112.54           C
ATOM   4814  OD1 ASP A1008       6.192   6.779  32.787  1.00113.54           O
ATOM   4815  OD2 ASP A1008       4.271   7.476  33.536  1.00113.54           O1-
ATOM   4816  H   ASP A1008       2.022   3.745  31.785  1.00  0.00           H
ATOM   4817  HA  ASP A1008       3.338   6.348  31.130  1.00  0.00           H
ATOM   4818  HB2 ASP A1008       3.801   4.938  33.572  1.00  0.00           H
ATOM   4819  HB3 ASP A1008       5.149   4.514  32.574  1.00  0.00           H
ATOM   4820  N   ASP A1009       4.539   5.299  29.277  1.00109.19           N
ATOM   4821  CA  ASP A1009       5.214   4.637  28.163  1.00107.56           C
ATOM   4822  C   ASP A1009       6.347   5.452  27.569  1.00106.29           C
ATOM   4823  O   ASP A1009       6.313   5.755  26.392  1.00106.48           O
ATOM   4824  CB  ASP A1009       4.191   4.358  27.076  1.00107.60           C
ATOM   4825  CG  ASP A1009       2.816   4.834  27.460  1.00107.03           C
ATOM   4826  OD1 ASP A1009       2.133   5.428  26.613  1.00105.27           O
ATOM   4827  OD2 ASP A1009       2.436   4.630  28.629  1.00107.16           O
ATOM   4828  H   ASP A1009       4.464   6.306  29.285  1.00  0.00           H
ATOM   4829  HA  ASP A1009       5.682   3.697  28.465  1.00  0.00           H
ATOM   4830  HB2 ASP A1009       4.379   4.667  26.049  1.00  0.00           H
ATOM   4831  HB3 ASP A1009       4.102   3.274  26.993  1.00  0.00           H
ATOM   4832  HD2 ASP A1009       1.563   4.959  28.792  1.00  0.00           H
ATOM   4833  N   VAL A1010       7.363   5.787  28.352  1.00104.34           N
ATOM   4834  CA  VAL A1010       8.456   6.603  27.836  1.00102.25           C
ATOM   4835  C   VAL A1010       7.864   7.895  27.363  1.00100.70           C
ATOM   4836  O   VAL A1010       8.297   8.474  26.384  1.00 99.96           O
ATOM   4837  CB  VAL A1010       9.115   5.954  26.631  1.00102.51           C
ATOM   4838  CG1 VAL A1010      10.249   6.854  26.138  1.00 -1.00           C
ATOM   4839  CG2 VAL A1010       9.688   4.568  26.958  1.00 -1.00           C
ATOM   4840  H   VAL A1010       7.371   5.513  29.325  1.00  0.00           H
ATOM   4841  HA  VAL A1010       9.179   6.784  28.632  1.00  0.00           H
ATOM   4842  HB  VAL A1010       8.375   5.813  25.843  1.00 -1.00           H
ATOM   4843 HG11 VAL A1010      10.728   6.396  25.272  1.00 -1.00           H
ATOM   4844 HG12 VAL A1010       9.845   7.827  25.856  1.00 -1.00           H
ATOM   4845 HG13 VAL A1010      10.984   6.983  26.933  1.00 -1.00           H
ATOM   4846 HG21 VAL A1010      10.149   4.145  26.066  1.00 -1.00           H
ATOM   4847 HG22 VAL A1010      10.438   4.661  27.744  1.00 -1.00           H
ATOM   4848 HG23 VAL A1010       8.885   3.913  27.298  1.00 -1.00           H
ATOM   4849  N   VAL A1011       6.849   8.330  28.081  1.00 98.81           N
ATOM   4850  CA  VAL A1011       6.110   9.507  27.734  1.00 96.74           C
ATOM   4851  C   VAL A1011       6.006  10.322  28.951  1.00 96.10           C
ATOM   4852  O   VAL A1011       4.961  10.412  29.521  1.00 95.94           O
ATOM   4853  CB  VAL A1011       4.686   9.147  27.417  1.00 96.41           C
ATOM   4854  CG1 VAL A1011       3.920  10.419  27.050  1.00 -1.00           C
ATOM   4855  CG2 VAL A1011       4.583   8.153  26.252  1.00 -1.00           C
ATOM   4856  H   VAL A1011       6.565   7.812  28.900  1.00  0.00           H
ATOM   4857  HA  VAL A1011       6.543  10.105  26.929  1.00  0.00           H
ATOM   4858  HB  VAL A1011       4.230   8.668  28.284  1.00 -1.00           H
ATOM   4859 HG11 VAL A1011       2.885  10.167  26.819  1.00 -1.00           H
ATOM   4860 HG12 VAL A1011       3.945  11.114  27.890  1.00 -1.00           H
ATOM   4861 HG13 VAL A1011       4.383  10.885  26.180  1.00 -1.00           H
ATOM   4862 HG21 VAL A1011       3.535   7.923  26.061  1.00 -1.00           H
ATOM   4863 HG22 VAL A1011       5.028   8.592  25.359  1.00 -1.00           H
ATOM   4864 HG23 VAL A1011       5.114   7.236  26.508  1.00 -1.00           H
ATOM   4865  N   ASP A1012       7.108  10.904  29.358  1.00 95.37           N
ATOM   4866  CA  ASP A1012       7.152  11.730  30.529  1.00 94.81           C
ATOM   4867  C   ASP A1012       7.028  13.104  29.955  1.00 95.09           C
ATOM   4868  O   ASP A1012       7.899  13.554  29.253  1.00 95.11           O
ATOM   4869  CB  ASP A1012       8.529  11.585  31.174  1.00 96.11           C
ATOM   4870  CG  ASP A1012       8.582  10.509  32.231  1.00 97.11           C
ATOM   4871  OD1 ASP A1012       8.653   9.316  31.884  1.00 99.11           O
ATOM   4872  OD2 ASP A1012       8.581  10.861  33.420  1.00 99.11           O1-
ATOM   4873  H   ASP A1012       7.962  10.775  28.836  1.00  0.00           H
ATOM   4874  HA  ASP A1012       6.354  11.539  31.252  1.00  0.00           H
ATOM   4875  HB2 ASP A1012       9.306  11.394  30.432  1.00  0.00           H
ATOM   4876  HB3 ASP A1012       8.820  12.516  31.667  1.00  0.00           H
ATOM   4877  N   ALA A1013       5.962  13.818  30.214  1.00 95.39           N
ATOM   4878  CA  ALA A1013       5.983  15.087  29.564  1.00 96.06           C
ATOM   4879  C   ALA A1013       4.994  16.148  29.953  1.00 96.52           C
ATOM   4880  O   ALA A1013       4.086  15.925  30.710  1.00 97.57           O
ATOM   4881  CB  ALA A1013       5.932  14.851  28.110  1.00 96.68           C
ATOM   4882  H   ALA A1013       5.191  13.513  30.790  1.00  0.00           H
ATOM   4883  HA  ALA A1013       6.922  15.593  29.819  1.00  0.00           H
ATOM   4884  HB1 ALA A1013       6.647  15.502  27.604  1.00  0.00           H
ATOM   4885  HB2 ALA A1013       6.051  13.842  27.716  1.00  0.00           H
ATOM   4886  HB3 ALA A1013       4.930  15.115  27.865  1.00  0.00           H
ATOM   4887  N   ASP A1014       5.233  17.331  29.417  1.00 97.00           N
ATOM   4888  CA  ASP A1014       4.362  18.455  29.591  1.00 97.00           C
ATOM   4889  C   ASP A1014       5.139  19.595  30.165  1.00 97.00           C
ATOM   4890  O   ASP A1014       6.100  20.056  29.580  1.00 97.00           O
ATOM   4891  CB  ASP A1014       3.233  18.079  30.511  1.00 97.00           C
ATOM   4892  CG  ASP A1014       2.012  17.628  29.761  1.00 97.00           C
ATOM   4893  OD1 ASP A1014       1.919  16.406  29.502  1.00 -1.00           O
ATOM   4894  OD2 ASP A1014       1.201  18.512  29.416  1.00 -1.00           O1-
ATOM   4895  H   ASP A1014       6.029  17.443  28.806  1.00  0.00           H
ATOM   4896  HA  ASP A1014       3.993  18.764  28.612  1.00  0.00           H
ATOM   4897  HB2 ASP A1014       3.387  17.816  31.564  1.00  0.00           H
ATOM   4898  HB3 ASP A1014       2.741  19.021  30.712  1.00  0.00           H
ATOM   4899  N   GLU A1015       4.677  20.095  31.288  1.00 96.86           N
ATOM   4900  CA  GLU A1015       5.317  21.225  31.879  1.00 97.18           C
ATOM   4901  C   GLU A1015       6.806  21.000  31.846  1.00 97.86           C
ATOM   4902  O   GLU A1015       7.575  21.920  31.674  1.00 97.98           O
ATOM   4903  CB  GLU A1015       4.811  21.416  33.285  1.00 97.98           C
ATOM   4904  CG  GLU A1015       3.653  22.357  33.330  1.00 97.98           C
ATOM   4905  CD  GLU A1015       2.871  22.279  34.603  1.00 97.98           C
ATOM   4906  OE1 GLU A1015       2.750  21.193  35.192  1.00 97.98           O
ATOM   4907  OE2 GLU A1015       2.359  23.322  35.016  1.00 97.98           O1-
ATOM   4908  H   GLU A1015       3.863  19.698  31.736  1.00  0.00           H
ATOM   4909  HA  GLU A1015       5.107  22.111  31.275  1.00  0.00           H
ATOM   4910  HB2 GLU A1015       4.580  20.442  33.722  1.00  0.00           H
ATOM   4911  HB3 GLU A1015       5.593  21.836  33.922  1.00  0.00           H
ATOM   4912  HG2 GLU A1015       3.995  23.380  33.165  1.00  0.00           H
ATOM   4913  HG3 GLU A1015       2.960  22.130  32.521  1.00  0.00           H
ATOM   4914  N   TYR A1016       7.224  19.765  32.020  1.00 98.11           N
ATOM   4915  CA  TYR A1016       8.630  19.463  31.974  1.00 98.48           C
ATOM   4916  C   TYR A1016       9.282  19.670  30.621  1.00 99.01           C
ATOM   4917  O   TYR A1016      10.411  20.103  30.547  1.00 99.31           O
ATOM   4918  CB  TYR A1016       8.891  18.066  32.482  1.00100.31           C
ATOM   4919  CG  TYR A1016      10.331  17.591  32.499  1.00 -1.00           C
ATOM   4920  CD1 TYR A1016      10.862  16.918  31.383  1.00 -1.00           C
ATOM   4921  CD2 TYR A1016      11.134  17.803  33.633  1.00 -1.00           C
ATOM   4922  CE1 TYR A1016      12.196  16.473  31.396  1.00 -1.00           C
ATOM   4923  CE2 TYR A1016      12.468  17.360  33.646  1.00 -1.00           C
ATOM   4924  CZ  TYR A1016      13.001  16.697  32.526  1.00 -1.00           C
ATOM   4925  OH  TYR A1016      14.296  16.268  32.534  1.00 -1.00           O
ATOM   4926  H   TYR A1016       6.560  19.019  32.169  1.00  0.00           H
ATOM   4927  HA  TYR A1016       9.137  20.134  32.672  1.00  0.00           H
ATOM   4928  HB2 TYR A1016       8.546  17.983  33.513  1.00  0.00           H
ATOM   4929  HB3 TYR A1016       8.356  17.347  31.861  1.00  0.00           H
ATOM   4930  HD1 TYR A1016      10.245  16.742  30.515  1.00 -1.00           H
ATOM   4931  HD2 TYR A1016      10.726  18.307  34.497  1.00 -1.00           H
ATOM   4932  HE1 TYR A1016      12.602  15.959  30.537  1.00 -1.00           H
ATOM   4933  HE2 TYR A1016      13.085  17.530  34.517  1.00 -1.00           H
ATOM   4934  HH  TYR A1016      14.705  16.497  33.372  1.00 -1.00           H
ATOM   4935  N   LEU A1017       8.611  19.333  29.536  1.00 99.26           N
ATOM   4936  CA  LEU A1017       9.275  19.481  28.251  1.00 99.60           C
ATOM   4937  C   LEU A1017       9.727  20.881  27.941  1.00 99.60           C
ATOM   4938  O   LEU A1017      10.769  21.078  27.369  1.00100.10           O
ATOM   4939  CB  LEU A1017       8.412  18.988  27.104  1.00102.10           C
ATOM   4940  CG  LEU A1017       8.913  19.422  25.724  1.00104.10           C
ATOM   4941  CD1 LEU A1017       9.848  18.427  25.113  1.00103.10           C
ATOM   4942  CD2 LEU A1017       7.799  19.704  24.764  1.00103.10           C
ATOM   4943  H   LEU A1017       7.643  19.047  29.585  1.00  0.00           H
ATOM   4944  HA  LEU A1017      10.169  18.852  28.263  1.00  0.00           H
ATOM   4945  HB2 LEU A1017       8.293  17.904  27.150  1.00  0.00           H
ATOM   4946  HB3 LEU A1017       7.408  19.390  27.249  1.00  0.00           H
ATOM   4947  HG  LEU A1017       9.414  20.375  25.623  1.00  0.00           H
ATOM   4948 HD11 LEU A1017      10.274  18.801  24.184  1.00  0.00           H
ATOM   4949 HD12 LEU A1017      10.684  18.219  25.781  1.00  0.00           H
ATOM   4950 HD13 LEU A1017       9.350  17.480  24.901  1.00  0.00           H
ATOM   4951 HD21 LEU A1017       8.179  20.055  23.803  1.00  0.00           H
ATOM   4952 HD22 LEU A1017       7.207  18.824  24.563  1.00  0.00           H
ATOM   4953 HD23 LEU A1017       7.129  20.475  25.145  1.00  0.00           H
ATOM   4954  N   ILE A1018       8.935  21.863  28.295  1.00 99.42           N
ATOM   4955  CA  ILE A1018       9.298  23.218  27.985  1.00 99.19           C
ATOM   4956  C   ILE A1018      10.549  23.714  28.655  1.00 99.30           C
ATOM   4957  O   ILE A1018      11.294  24.484  28.071  1.00 99.58           O
ATOM   4958  CB  ILE A1018       8.216  24.174  28.356  1.00 99.58           C
ATOM   4959  CG1 ILE A1018       7.144  24.161  27.282  1.00 99.58           C
ATOM   4960  CG2 ILE A1018       8.798  25.562  28.563  1.00 99.58           C
ATOM   4961  CD1 ILE A1018       6.248  23.000  27.391  1.00 99.58           C
ATOM   4962  H   ILE A1018       8.069  21.675  28.780  1.00  0.00           H
ATOM   4963  HA  ILE A1018       9.485  23.287  26.910  1.00  0.00           H
ATOM   4964  HB  ILE A1018       7.772  23.886  29.312  1.00  0.00           H
ATOM   4965 HG12 ILE A1018       6.520  25.048  27.398  1.00  0.00           H
ATOM   4966 HG13 ILE A1018       7.565  24.234  26.278  1.00  0.00           H
ATOM   4967 HG21 ILE A1018       7.966  26.261  28.654  1.00  0.00           H
ATOM   4968 HG22 ILE A1018       9.324  25.729  29.501  1.00  0.00           H
ATOM   4969 HG23 ILE A1018       9.361  25.944  27.709  1.00  0.00           H
ATOM   4970 HD11 ILE A1018       5.370  23.142  26.761  1.00  0.00           H
ATOM   4971 HD12 ILE A1018       6.716  22.077  27.054  1.00  0.00           H
ATOM   4972 HD13 ILE A1018       5.890  22.850  28.410  1.00  0.00           H
ATOM   4973  N   PRO A1019      10.792  23.331  29.892  1.00 99.01           N
ATOM   4974  CA  PRO A1019      11.975  23.895  30.528  1.00 98.50           C
ATOM   4975  C   PRO A1019      12.933  22.978  31.270  1.00 98.49           C
ATOM   4976  O   PRO A1019      12.627  21.855  31.628  1.00 98.37           O
ATOM   4977  CB  PRO A1019      11.378  24.914  31.479  1.00 99.37           C
ATOM   4978  CG  PRO A1019      10.012  24.336  31.852  1.00 -1.00           C
ATOM   4979  CD  PRO A1019      10.039  22.319  30.668  1.00 -1.00           C
ATOM   4980  HA  PRO A1019      12.641  24.453  29.867  1.00  0.00           H
ATOM   4981  HB2 PRO A1019      12.010  25.037  32.358  1.00  0.00           H
ATOM   4982  HB3 PRO A1019      11.279  25.884  30.992  1.00  0.00           H
ATOM   4983  HG2 PRO A1019      10.090  23.701  32.734  1.00 -1.00           H
ATOM   4984  HG3 PRO A1019       9.302  25.134  32.067  1.00 -1.00           H
ATOM   4985  HD2 PRO A1019      10.509  21.369  30.924  1.00 -1.00           H
ATOM   4986  HD3 PRO A1019       9.202  22.116  30.001  1.00 -1.00           H
ATOM   4987  N   GLN A1020      14.132  23.512  31.468  1.00 98.56           N
ATOM   4988  CA  GLN A1020      15.206  22.855  32.189  1.00 98.56           C
ATOM   4989  C   GLN A1020      14.678  22.264  33.484  1.00 98.56           C
ATOM   4990  O   GLN A1020      13.475  22.271  33.724  1.00 98.56           O
ATOM   4991  OXT GLN A1020      15.607  21.756  34.305  1.00 -1.00           O1-
ATOM   4992  CB  GLN A1020      16.311  23.867  32.496  1.00 98.56           C
ATOM   4993  CG  GLN A1020      16.681  24.761  31.318  1.00 98.56           C
ATOM   4994  CD  GLN A1020      17.844  25.690  31.619  1.00 98.56           C
ATOM   4995  OE1 GLN A1020      17.647  26.812  32.065  1.00 98.56           O
ATOM   4996  NE2 GLN A1020      19.057  25.225  31.373  1.00 98.56           N
ATOM   4997  H   GLN A1020      14.303  24.448  31.131  1.00  0.00           H
ATOM   4998  HA  GLN A1020      15.602  22.056  31.560  1.00  0.00           H
ATOM   4999  HB2 GLN A1020      16.004  24.511  33.323  1.00  0.00           H
ATOM   5000  HB3 GLN A1020      17.196  23.332  32.845  1.00  0.00           H
ATOM   5001  HG2 GLN A1020      16.927  24.149  30.448  1.00  0.00           H
ATOM   5002  HG3 GLN A1020      15.839  25.388  31.023  1.00  0.00           H
ATOM   5003 HE21 GLN A1020      19.179  24.294  31.004  1.00  0.00           H
ATOM   5004 HE22 GLN A1020      19.859  25.810  31.556  1.00  0.00           H
TER    5005      GLN A1020
HETATM 5006  C26 UNK   900     -15.940  18.956  36.167  1.00  0.00           C
HETATM 5007  C25 UNK   900     -15.839  19.723  34.844  1.00  0.00           C
HETATM 5008  C24 UNK   900     -15.232  18.974  33.666  1.00  0.00           C
HETATM 5009  O4  UNK   900     -15.357  17.754  33.564  1.00  0.00           O
HETATM 5010  N8  UNK   900     -14.584  19.752  32.784  1.00  0.00           N
HETATM 5011  C16 UNK   900     -13.935  19.353  31.592  1.00  0.00           C
HETATM 5012  C17 UNK   900     -12.795  20.075  31.189  1.00  0.00           C
HETATM 5013  C12 UNK   900     -12.056  19.667  30.057  1.00  0.00           C
HETATM 5014  N4  UNK   900     -10.780  20.249  29.796  1.00  0.00           N
HETATM 5015  C13 UNK   900     -12.511  18.576  29.283  1.00  0.00           C
HETATM 5016  C30 UNK   900      -9.668  19.492  30.272  1.00  0.00           C
HETATM 5017  C14 UNK   900     -13.680  17.892  29.655  1.00  0.00           C
HETATM 5018  C23 UNK   900     -10.645  21.455  29.202  1.00  0.00           C
[truncated: 7,314 more chars]
